# Supplementary material for: Linking Genomic and Physiological Characteristics of Psychrophilic Arthrobacter to Metagenomic Data to Explain Global Environmental Distribution
Source: Research Square preprint supplement (doi:10.21203/rs.3.rs-119482/v1), 2020-12-07
Supplement: Supplementary file 1 [file 2fbd11b6efb60be530b8b3df.xlsx]

## Sheet: summary
Table S2 Proteins and stability equations used for stability predictions
Category	Subcategory	Subsystem	Functional role	Gene	Stability curves	GCA_000014925	GCA_000022025	GCA_000189535	GCA_000196235	GCA_000238915	GCA_000281065	GCA_000294595	GCA_000294695	GCA_000332815	GCA_000374865	GCA_000374905	GCA_000374925	GCA_000374945	GCA_000468215	GCA_000482545	GCA_000514015	GCA_000514155	GCA_000517125	GCA_000520555	GCA_000520575	GCA_000520595	GCA_000620385	GCA_000685965	GCA_000755585	GCA_000785535	GCA_000813845	GCA_000816565	GCA_000876655	GCA_000962805	GCA_001046895	GCA_001187915	GCA_001238605	GCA_001281315	GCA_001294625	GCA_001307035	GCA_001373495	GCA_001422645	GCA_001422665	GCA_001423525	GCA_001423745	GCA_001424565	GCA_001428005	GCA_001428075	GCA_001428325
Amino Acids and Derivatives	Histidine Metabolism	Histidine Biosynthesis	Imidazole glycerol phosphate synthase cyclase subunit (EC 4.1.3.-)	hisF	Identical curves	1	1	1	1	1	1	1	1	1	1	1	1	1	1	1	1	1	1	1	1	1	1	1	1	1	1	1	1	1	1	1	1	1	1	1	1	1	1	1	1	1	1	1	1
Amino Acids and Derivatives	Histidine Metabolism	Histidine Biosynthesis	Imidazole glycerol phosphate synthase amidotransferase subunit (EC 2.4.2.-)	hisH	Identical curves	1	1	1	1	1	1	1	1	1	1	1	1	1	1	1	1	1	1	1	1	1	1	1	1	1	1	1	1	1	1	1	1	1	1	1	1	1	1	1	1	1	1	1	1
Amino Acids and Derivatives	Histidine Metabolism	Histidine Biosynthesis	Histidinol-phosphatase [alternative form] (EC 3.1.3.15)	hisN	Identical curves	1	1	1	1	1	1	1	1	1	1	1	1	1	1	1	1	1	1	1	1	1	1	1	1	1	1	2	1	1	1	1	1	1	1	1	1	1	1	1	1	1	1	1	1
Amino Acids and Derivatives	Histidine Metabolism	Histidine Degradation	Imidazolonepropionase (EC 3.5.2.7)	hutI	Identical curves	1	1	1	1	1	1	1	1	1	1	1	1	1	1	1	1	1	1	0	0	1	1	1	1	1	1	1	1	1	1	0	1	1	1	1	1	1	1	1	1	1	1	1	1
Amino Acids and Derivatives	Histidine Metabolism	Histidine Biosynthesis	ATP phosphoribosyltransferase (EC 2.4.2.17)	hisG	not well fitted	1	1	1	1	1	1	1	1	2	1	1	1	1	1	1	1	1	1	1	1	1	1	1	1	1	1	1	1	1	1	1	1	1	1	1	1	1	1	1	1	1	1	1	1
Amino Acids and Derivatives	Histidine Metabolism	Histidine Biosynthesis	Phosphoribosyl-ATP pyrophosphatase (EC 3.6.1.31)	hisI	not well fitted	1	1	1	1	1	1	1	1	1	1	1	1	1	1	1	1	1	1	1	1	1	1	1	1	1	1	1	1	1	1	1	1	1	1	1	1	1	1	1	1	1	1	1	1
Amino Acids and Derivatives	Aromatic amino acids and derivatives	Tryptophan synthesis	Acting phosphoribosylanthranilate isomerase (EC 5.3.1.24)	trpF	not well fitted	1	1	1	1	1	1	1	1	1	1	1	1	1	1	1	1	1	1	1	1	1	1	1	1	1	1	1	1	1	1	1	1	1	1	1	1	1	1	1	1	1	1	1	1
Amino Acids and Derivatives	Proline and 4-hydroxyproline	Proline Synthesis	Gamma-glutamyl phosphate reductase (EC 1.2.1.41)	proA	ΔG increased	1	1	1	1	1	1	1	1	1	1	1	1	1	1	1	1	1	1	1	1	1	1	1	1	1	1	1	1	1	1	1	1	1	1	1	1	1	1	1	1	1	1	1	1
Amino Acids and Derivatives	Proline and 4-hydroxyproline	Proline Synthesis	Glutamate 5-kinase (EC 2.7.2.11)	proB	ΔG increased	1	1	1	1	1	1	1	1	1	1	1	1	1	1	1	1	1	1	1	1	1	1	1	1	1	1	1	1	1	1	1	1	0	1	1	1	1	1	1	1	1	1	1	1
Amino Acids and Derivatives	Proline and 4-hydroxyproline	A Hypothetical Protein Related to Proline Metabolism	Hypothetical protein YggS, proline synthase co-transcribed bacterial homolog PROSC	yggS	ΔG increased	1	1	1	1	1	1	1	1	1	1	1	1	1	1	1	1	1	1	1	1	1	1	1	1	2	1	1	1	1	1	1	1	1	1	1	1	1	1	1	1	1	1	1	1
Carbohydrates	Central carbohydrate metabolism	Dihydroxyacetone kinases	Phosphoenolpyruvate-dihydroxyacetone phosphotransferase (EC 2.7.1.121), ADP-binding subunit DhaL	dhaL	Identical curves	1	1	1	1	2	1	1	1	1	1	1	1	1	1	1	1	1	1	1	1	1	1	1	1	1	1	1	1	1	1	1	1	1	1	1	1	1	1	1	1	1	3	1	1
Carbohydrates	Polysaccharides	Glycogen metabolism	Predicted glycogen synthase, ADP-glucose transglucosylase (EC 2.4.1.21), Actinobacterial type	glgA	Identical curves	1	1	1	1	1	1	1	1	1	1	1	1	1	1	1	1	1	1	1	1	1	1	1	1	1	1	1	1	1	1	1	1	1	1	1	1	1	1	1	1	1	1	1	1
Carbohydrates	Central carbohydrate metabolism	Glycolysis and Gluconeogenesis	Fructose-1,6-bisphosphatase, GlpX type (EC 3.1.3.11)	glpX	Identical curves	1	1	1	1	1	1	1	1	0	1	1	1	1	1	1	1	1	1	1	1	1	1	1	1	1	1	1	1	1	1	2	1	1	1	1	1	1	1	1	1	1	1	2	1
Carbohydrates	Monosaccharides	Mannose Metabolism	Mannose-1-phosphate guanylyltransferase (GDP) (EC 2.7.7.22)	manC	Identical curves	1	1	1	1	1	1	1	1	1	1	1	1	1	1	1	1	1	1	1	1	1	1	1	2	1	1	1	1	1	1	1	1	1	1	1	1	1	1	1	1	1	1	1	1
Carbohydrates	Central carbohydrate metabolism	Pyruvate metabolism I: anaplerotic reactions, PEP	Phosphoenolpyruvate carboxykinase [GTP] (EC 4.1.1.32)	pckG	Identical curves	1	1	1	1	1	1	1	1	1	1	1	2	1	1	1	1	1	1	1	1	1	1	1	1	1	1	1	1	1	1	1	1	1	1	1	1	1	1	1	1	1	1	1	1
Carbohydrates	Di- and oligosaccharides	Trehalose Biosynthesis	Alpha,alpha-trehalose-phosphate synthase [UDP-forming] (EC 2.4.1.15)	TPS1	Identical curves	1	1	1	1	1	1	1	1	1	1	1	1	1	1	1	1	1	1	1	1	1	1	1	1	1	1	1	1	1	1	1	1	1	1	1	1	1	1	1	1	1	1	1	1
Carbohydrates	Di- and oligosaccharides	Trehalose Biosynthesis	Trehalose-6-phosphate phosphatase (EC 3.1.3.12)	ostA	Identical curves	2	4	3	3	2	2	3	2	4	3	3	3	2	3	2	2	2	3	1	1	2	3	3	1	1	2	2	3	2	3	2	2	1	2	1	1	3	3	3	3	2	3	2	3
Carbohydrates	Central carbohydrate metabolism	Dihydroxyacetone kinases	DHA-specific IIA component	dhaM	not well fitted	1	1	1	1	1	1	1	1	1	1	1	1	1	1	1	1	1	1	1	1	1	1	1	1	1	1	1	1	1	1	1	1	1	1	1	1	1	1	1	1	1	2	1	1
Carbohydrates	Central carbohydrate metabolism	Glycolysis and Gluconeogenesis	Glucose-6-phosphate isomerase (EC 5.3.1.9)	pgi	not well fitted	1	1	1	1	1	1	1	1	0	1	1	1	1	1	2	2	1	1	1	1	1	1	1	1	1	1	1	1	1	1	1	1	3	1	1	1	1	1	1	1	1	1	1	1
Carbohydrates	Di- and oligosaccharides	Trehalose Biosynthesis	Alpha-amylase (EC 3.2.1.1)	amylase	ΔG increased	2	2	2	2	2	2	2	2	2	2	2	2	2	2	2	2	2	2	2	2	2	2	2	2	2	2	2	2	2	2	2	2	2	2	2	2	2	2	2	2	2	2	2	2
Cell Division and Cell Cycle	Cell Division and Cell Cycle - no subcategory	Bacterial Cytoskeleton	Cell division protein FtsZ (EC 3.4.24.-)	ftsZ	Identical curves	1	1	1	1	1	1	1	1	0	1	1	1	1	1	1	1	1	1	1	1	1	1	1	1	1	1	2	1	1	1	1	1	1	1	1	1	1	1	1	1	1	1	1	1
Cell Division and Cell Cycle	Cell Division and Cell Cycle - no subcategory	Bacterial Cytoskeleton	Cell division protein FtsQ	ftsQ	not well fitted	1	1	1	1	1	1	1	1	0	1	1	1	1	1	1	1	1	1	1	1	1	1	1	1	1	1	1	1	1	1	1	1	1	1	1	1	1	1	1	1	1	1	1	1
Cell Division and Cell Cycle	Cell Division and Cell Cycle - no subcategory	Bacterial Cytoskeleton	Septum formation protein Maf	maf	ΔG increased	1	1	1	1	1	1	1	1	0	1	1	1	1	1	1	1	1	1	1	1	1	1	1	1	1	1	1	1	1	1	1	1	1	1	1	1	1	1	1	1	1	1	1	1
Cell Wall and Capsule	Cell Wall and Capsule - no subcategory	Peptidoglycan Biosynthesis	Phospho-N-acetylmuramoyl-pentapeptide-transferase (EC 2.7.8.13)	mraY	Identical curves	1	1	1	1	1	1	1	1	1	1	1	1	1	1	1	1	1	1	1	1	1	1	1	1	1	1	1	1	1	1	1	1	1	1	1	1	1	1	1	1	1	1	1	1
Cell Wall and Capsule	Cell Wall and Capsule - no subcategory	YjeE	TsaE protein, required for threonylcarbamoyladenosine t(6)A37 formation in tRNA	tsaE	not well fitted	1	1	1	1	1	1	1	1	1	1	1	1	1	1	1	1	1	1	1	1	1	1	1	1	1	1	1	1	1	1	1	1	1	1	1	1	1	1	1	1	1	1	1	1
Cofactors, Vitamins, Prosthetic Groups, Pigments	Folate and pterines	Folate Biosynthesis	Dihydrofolate synthase (EC 6.3.2.12)	folC	Identical curves	1	1	1	1	1	1	1	1	1	1	1	1	1	1	1	1	1	1	1	1	1	1	1	1	1	1	1	1	1	1	1	1	1	1	1	1	1	1	1	1	1	1	1	1
Cofactors, Vitamins, Prosthetic Groups, Pigments	Tetrapyrroles	Heme and Siroheme Biosynthesis	Porphobilinogen deaminase (EC 2.5.1.61)	hemC	Identical curves	1	1	1	1	1	1	1	1	2	1	1	1	1	1	1	1	1	1	1	1	1	1	1	1	1	1	1	1	1	1	1	1	1	1	1	1	1	1	1	1	1	1	1	1
Cofactors, Vitamins, Prosthetic Groups, Pigments	Tetrapyrroles	Heme and Siroheme Biosynthesis	Uroporphyrinogen III decarboxylase (EC 4.1.1.37)	hemE	Identical curves	1	1	1	1	1	1	1	1	2	1	1	1	1	1	1	1	1	1	1	1	1	1	1	1	1	1	1	1	1	1	1	1	2	1	1	1	1	1	1	1	1	1	1	1
Cofactors, Vitamins, Prosthetic Groups, Pigments	NAD and NADP	NAD and NADP cofactor biosynthesis global	Kynureninase (EC 3.7.1.3)	kynU	Identical curves	1	1	1	1	1	1	1	1	1	1	1	1	1	1	1	1	1	1	1	1	1	1	1	1	0	1	1	1	1	1	1	1	3	2	1	1	1	1	1	1	1	1	1	1
Cofactors, Vitamins, Prosthetic Groups, Pigments	Folate and pterines	Molybdenum cofactor biosynthesis	Molybdenum cofactor biosynthesis protein MoaB	moaB	Identical curves	1	1	1	1	1	1	1	1	1	1	1	1	1	1	1	1	1	1	1	1	1	1	1	1	1	1	1	1	1	1	1	1	1	1	1	1	1	1	1	1	1	1	1	1
Cofactors, Vitamins, Prosthetic Groups, Pigments	Folate and pterines	Molybdenum cofactor biosynthesis	Molybdenum ABC transporter, periplasmic molybdenum-binding protein ModA (TC 3.A.1.8.1)	modA	Identical curves	1	1	1	1	1	2	0	1	2	1	1	1	1	1	1	1	1	1	1	1	1	1	1	1	1	1	1	1	1	1	1	1	1	1	1	1	1	1	1	1	1	1	1	1
Cofactors, Vitamins, Prosthetic Groups, Pigments	NAD and NADP	NAD and NADP cofactor biosynthesis global	Nicotinate-nucleotide adenylyltransferase (EC 2.7.7.18)	nadD	Identical curves	1	1	1	1	1	1	1	1	1	1	1	1	1	1	1	1	1	1	1	1	1	1	1	1	1	1	1	1	1	1	1	1	1	1	1	1	1	1	1	1	1	1	1	1
Cofactors, Vitamins, Prosthetic Groups, Pigments	NAD and NADP	NAD and NADP cofactor biosynthesis global	NAD synthetase (EC 6.3.1.5)	nadE	Identical curves	1	1	1	1	1	1	1	1	1	1	1	1	1	1	1	1	1	1	1	1	1	1	1	1	1	1	1	1	1	1	1	1	1	1	1	1	1	1	1	1	1	1	1	1
Cofactors, Vitamins, Prosthetic Groups, Pigments	NAD and NADP	NAD and NADP cofactor biosynthesis global	NAD kinase (EC 2.7.1.23)	nadK	Identical curves	1	1	1	1	1	1	1	1	1	1	1	1	1	1	1	1	1	1	1	1	1	1	1	1	1	1	1	1	1	1	1	1	1	1	1	1	1	1	1	1	1	1	1	1
Cofactors, Vitamins, Prosthetic Groups, Pigments	Biotin	Biotin synthesis cluster	Competence protein F homolog, phosphoribosyltransferase domain	gntX	not well fitted	2	1	1	1	2	2	1	2	1	2	1	1	1	0	2	1	1	2	1	1	1	1	1	2	2	1	1	1	1	2	0	1	2	2	1	1	1	1	1	2	1	2	1	1
Cofactors, Vitamins, Prosthetic Groups, Pigments	Biotin	Biotin synthesis cluster	tRNA (cytidine(34)-2@1-O)-methyltransferase (EC 2.1.1.207)	trmL	not well fitted	2	1	1	1	2	2	1	2	1	2	1	1	1	1	2	1	1	2	1	1	1	1	1	2	2	1	1	1	1	2	1	1	2	2	1	1	1	1	1	2	1	2	1	1
Cofactors, Vitamins, Prosthetic Groups, Pigments	Coenzyme A	Coenzyme A Biosynthesis	Phosphopantetheine adenylyltransferase (EC 2.7.7.3)	coaD	not well fitted	1	1	1	1	1	1	1	1	1	1	1	1	1	1	1	1	1	1	1	1	1	1	1	1	1	1	1	1	1	1	1	1	1	1	1	1	1	1	1	1	1	1	1	1
Cofactors, Vitamins, Prosthetic Groups, Pigments	Coenzyme A	Coenzyme A Biosynthesis	Dephospho-CoA kinase (EC 2.7.1.24)	coaE	not well fitted	1	1	1	1	1	1	1	1	1	1	1	1	1	2	1	1	1	1	1	1	1	1	1	1	1	1	1	1	1	1	1	1	1	1	1	1	1	1	1	1	1	1	1	1
Cofactors, Vitamins, Prosthetic Groups, Pigments	Tetrapyrroles	Heme and Siroheme Biosynthesis	Hemoprotein HemQ, essential component of heme biosynthetic pathway in Gram-positive bacteria	hemQ	not well fitted	1	1	1	1	1	1	1	1	1	1	1	1	1	1	1	1	1	1	1	1	1	1	1	1	1	1	1	1	1	1	1	1	1	1	1	1	1	1	1	1	1	1	1	1
Cofactors, Vitamins, Prosthetic Groups, Pigments	Folate and pterines	Molybdenum cofactor biosynthesis	Molybdenum cofactor biosynthesis protein MoaC	moaC	not well fitted	1	1	1	1	1	2	1	1	2	1	1	1	1	1	1	1	1	1	1	1	1	1	1	1	1	1	1	1	1	1	1	1	1	1	1	1	1	1	1	1	1	1	1	1
Cofactors, Vitamins, Prosthetic Groups, Pigments	Folate and pterines	Molybdenum cofactor biosynthesis	Molybdenum cofactor biosynthesis protein MoaE	moaE	not well fitted	1	1	1	1	1	2	1	2	1	1	1	1	1	1	1	1	1	1	1	1	1	1	2	1	1	1	1	1	1	1	1	1	1	1	1	1	1	1	1	1	1	1	1	1
Cofactors, Vitamins, Prosthetic Groups, Pigments	Tetrapyrroles	Heme and Siroheme Biosynthesis	Glutamyl-tRNA reductase (EC 1.2.1.70)	hemA	ΔG increased	1	1	1	1	2	1	1	1	1	1	1	1	1	2	1	1	1	1	1	1	1	1	1	1	1	1	1	1	1	1	1	1	1	1	1	1	2	1	1	1	1	2	1	1
Cofactors, Vitamins, Prosthetic Groups, Pigments	Tetrapyrroles	Heme and Siroheme Biosynthesis	Ferrochelatase, protoheme ferro-lyase (EC 4.99.1.1)	hemH	ΔG increased	1	1	1	1	1	1	1	1	1	1	1	1	1	1	1	1	1	1	1	1	1	1	1	1	1	1	1	1	1	1	1	1	1	1	1	1	1	1	1	1	1	1	1	1
Cofactors, Vitamins, Prosthetic Groups, Pigments	Coenzyme A	Coenzyme A Biosynthesis	Phosphopantothenoylcysteine synthetase (EC 6.3.2.5)	coaB	ΔG increased	2	1	1	1	1	1	1	2	1	1	1	1	1	2	1	1	1	1	1	1	1	1	1	1	1	1	1	1	1	1	1	1	1	1	1	1	1	1	1	1	1	1	1	1
Cofactors, Vitamins, Prosthetic Groups, Pigments	Coenzyme A	Coenzyme A Biosynthesis	Phosphopantothenoylcysteine decarboxylase (EC 4.1.1.36)	coaC	ΔG increased	2	1	1	1	1	1	1	2	1	1	1	1	1	2	1	1	1	1	1	1	1	1	1	1	1	1	1	1	1	1	1	1	1	1	1	1	1	1	1	1	1	1	1	1
Cofactors, Vitamins, Prosthetic Groups, Pigments	Quinone cofactors	Menaquinone and Phylloquinone Biosynthesis	Menaquinone-specific isochorismate synthase (EC 5.4.4.2)	menF	ΔG increased	2	2	2	2	2	2	2	2	2	2	2	2	2	2	2	2	2	2	2	2	2	2	2	2	2	2	2	2	2	2	2	2	2	2	2	2	2	2	2	2	2	2	2	2
DNA Metabolism	DNA repair	DNA repair, bacterial	DNA repair protein RecN	recN	Identical curves	1	1	1	1	1	1	1	1	1	1	1	1	1	1	1	2	1	1	1	1	1	1	1	1	1	1	1	1	1	1	1	1	1	1	1	1	1	1	1	1	1	1	1	1
DNA Metabolism	DNA recombination	RuvABC plus a hypothetical	Holliday junction DNA helicase RuvA	ruvA	not well fitted	1	1	1	1	1	1	1	1	1	1	1	1	1	1	1	1	1	1	1	1	1	1	1	1	1	1	1	1	1	1	1	1	1	1	1	1	1	1	1	1	1	1	1	1
DNA Metabolism	DNA repair	DNA Repair Base Excision	Endonuclease III (EC 4.2.99.18)	apn1	not well fitted	1	1	1	1	1	1	1	1	1	1	1	1	1	1	1	1	1	1	1	1	1	1	1	1	1	1	1	1	1	1	1	1	1	1	1	1	1	1	1	1	1	1	1	1
DNA Metabolism	DNA repair	DNA repair, bacterial	DNA polymerase IV (EC 2.7.7.7)	dinB	not well fitted	1	1	1	1	1	1	1	1	1	1	1	1	1	1	1	1	1	1	1	1	1	1	1	1	1	1	1	1	1	1	1	1	1	1	1	1	1	1	1	1	1	1	1	1
DNA Metabolism	DNA repair	DNA Repair Base Excision	DNA ligase (EC 6.5.1.2)	ligA	not well fitted	1	2	1	1	1	1	1	1	1	1	1	1	1	1	1	1	1	1	1	1	1	1	1	1	1	1	1	1	1	1	1	1	1	1	1	1	1	1	1	1	1	1	1	1
DNA Metabolism	DNA repair	DNA repair, bacterial RecFOR pathway	DNA recombination and repair protein RecF	recF	not well fitted	1	1	1	1	1	1	1	1	1	1	1	1	1	1	1	1	1	1	1	1	1	1	2	1	1	1	1	1	1	1	1	1	1	1	1	1	1	1	1	1	1	1	1	1
DNA Metabolism	DNA recombination	RuvABC plus a hypothetical	Holliday junction DNA helicase RuvB	ruvB	not well fitted	1	1	1	1	1	1	1	1	1	1	1	1	1	1	1	1	1	1	1	1	1	1	1	1	2	1	1	1	1	1	1	1	1	1	1	1	1	1	1	1	1	1	1	1
DNA Metabolism	DNA recombination	RuvABC plus a hypothetical	Crossover junction endodeoxyribonuclease RuvC (EC 3.1.22.4)	ruvC	not well fitted	1	1	1	1	1	1	1	1	1	1	1	1	1	0	1	1	1	1	1	1	1	1	1	1	1	1	1	1	1	1	1	1	1	1	1	1	1	1	1	1	1	1	1	1
DNA Metabolism	DNA repair	DNA repair, bacterial	Exonuclease SbcC	sbcC	not well fitted	1	1	1	1	1	1	1	1	1	2	1	1	1	1	1	1	1	1	1	1	1	1	1	1	1	1	1	1	1	1	2	1	1	1	1	1	1	1	1	1	1	1	2	1
DNA Metabolism	DNA repair	DNA repair, bacterial	Exonuclease SbcD	sbcD	not well fitted	1	1	1	1	1	1	1	1	1	1	1	1	1	2	1	1	1	1	1	1	1	1	1	1	1	1	1	1	1	1	1	1	1	1	1	1	1	1	1	1	1	1	1	1
DNA Metabolism	DNA repair	DNA repair, bacterial RecBCD pathway	ATP-dependent DNA helicase SCO5183	sco5183	not well fitted	1	1	1	1	1	1	1	1	2	1	1	1	1	2	1	1	1	1	1	1	0	1	1	1	1	1	1	1	1	1	1	1	1	1	1	1	1	1	1	1	1	1	1	1
DNA Metabolism	DNA repair	DNA repair, bacterial RecBCD pathway	ATP-dependent DNA helicase SCO5184	SCO5184	not well fitted	1	1	1	1	1	1	1	1	2	1	1	1	1	2	1	1	1	1	1	1	0	1	1	1	1	1	1	1	1	1	1	1	1	1	1	1	1	1	1	1	1	1	1	1
DNA Metabolism	DNA Metabolism - no subcategory	DNA structural proteins, bacterial	Chromosome partition protein smc	smc	not well fitted	1	1	1	1	1	1	1	1	2	1	1	1	1	1	1	1	1	1	1	1	1	1	1	1	1	1	2	1	1	1	1	1	1	1	1	1	1	1	1	1	1	1	1	1
DNA Metabolism	DNA repair	DNA Repair Base Excision	DNA-3-methyladenine glycosylase (EC 3.2.2.20)	tag	not well fitted	1	1	1	1	1	1	1	1	1	1	1	1	1	1	1	1	1	1	1	1	1	1	1	1	1	1	1	1	1	1	1	1	1	1	1	1	1	1	1	1	1	1	1	1
DNA Metabolism	DNA replication	DNA topoisomerases, Type I, ATP-independent	DNA topoisomerase I (EC 5.99.1.2)	topA	not well fitted	1	1	1	1	1	1	1	1	1	1	1	1	1	1	1	1	2	1	1	1	1	1	1	1	1	1	1	1	1	1	1	1	2	1	1	1	1	1	1	1	1	1	1	1
DNA Metabolism	DNA repair	DNA repair, UvrABC system	Excinuclease ABC subunit B	uvrB	not well fitted	1	1	1	1	1	1	1	1	1	1	1	1	1	2	1	1	1	1	1	1	1	1	1	1	1	1	1	1	1	1	1	1	1	1	1	1	1	1	1	1	1	1	1	1
DNA Metabolism	DNA repair	DNA repair, UvrABC system	Excinuclease ABC subunit C	uvrC	not well fitted	1	1	1	1	1	1	1	1	1	1	1	1	1	1	1	1	1	1	1	1	1	1	1	1	1	1	1	1	1	1	1	1	1	1	1	1	1	1	1	1	1	1	1	1
DNA Metabolism	DNA repair	DNA repair, bacterial	Exodeoxyribonuclease VII large subunit (EC 3.1.11.6)	xseA	not well fitted	1	1	1	1	1	1	1	1	1	1	1	1	1	1	1	1	1	1	1	1	1	1	1	1	1	1	1	1	1	1	1	2	1	1	1	1	1	1	1	1	1	1	1	1
DNA Metabolism	DNA repair	DNA repair, bacterial	Exodeoxyribonuclease VII small subunit (EC 3.1.11.6)	xseB	not well fitted	1	1	1	1	1	1	1	1	0	1	1	1	1	1	1	1	1	1	0	0	1	1	1	1	1	1	1	1	1	1	1	1	1	1	1	1	1	1	1	1	1	1	1	1
DNA Metabolism	DNA repair	DNA repair, bacterial	A/G-specific adenine glycosylase (EC 3.2.2.-)	mutY	ΔG increased	1	1	1	1	1	1	1	1	1	1	1	1	1	1	1	1	1	1	1	1	1	1	1	1	1	1	1	2	1	1	0	1	1	1	1	1	1	1	1	1	1	1	1	1
DNA Metabolism	DNA repair	DNA repair, UvrABC system	Excinuclease ABC subunit A	uvrA	ΔG increased	1	1	1	1	1	1	1	1	1	1	1	1	1	1	1	1	1	1	1	1	1	1	1	1	1	1	1	1	1	1	1	1	1	1	1	1	1	1	1	1	1	1	1	1
DNA Metabolism	DNA repair	DNA repair, bacterial UvrD and related helicases	ATP-dependent DNA helicase UvrD/PcrA, actinomycete paralog	uvrD	ΔG increased	1	1	1	1	1	1	1	1	1	1	1	1	1	2	1	1	1	1	1	1	1	1	1	1	1	1	1	1	1	1	1	1	1	1	1	1	1	1	1	1	1	1	1	1
DNA Metabolism	DNA Metabolism - no subcategory	YcfH	Putative deoxyribonuclease YcfH	ycfH	ΔG increased	1	1	1	1	1	1	1	1	1	1	1	1	1	1	1	1	1	1	1	1	1	1	1	1	1	1	1	1	1	1	1	1	1	1	1	1	1	1	1	1	1	1	1	1
DNA Metabolism	DNA repair	DNA repair, bacterial DinG and relatives	DinG family ATP-dependent helicase YoaA	yoaA	ΔG increased	1	2	1	1	1	1	1	1	1	1	1	1	1	1	1	1	1	1	1	1	0	1	1	1	1	1	1	1	1	1	1	1	1	1	1	1	1	1	1	1	1	1	1	1
Fatty Acids, Lipids, and Isoprenoids	Fatty acids	Fatty Acid Biosynthesis FASII	Malonyl CoA-acyl carrier protein transacylase (EC 2.3.1.39)	fabD	Identical curves	2	1	1	1	1	1	1	2	1	1	1	1	1	1	1	1	1	1	1	1	1	1	1	1	1	1	1	1	1	1	1	1	1	1	1	2	1	1	2	1	1	1	1	1
Fatty Acids, Lipids, and Isoprenoids	Fatty acids	Fatty Acid Biosynthesis FASII	Holo-[acyl-carrier protein] synthase (EC 2.7.8.7)	acpS	not well fitted	1	1	1	1	1	1	1	1	1	1	1	1	1	1	1	1	1	1	1	1	1	1	1	1	1	1	1	1	1	1	1	1	1	1	1	1	1	1	1	1	1	1	1	1
Fatty Acids, Lipids, and Isoprenoids	Phospholipids	Glycerolipid and Glycerophospholipid Metabolism in Bacteria	Phosphatidate cytidylyltransferase (EC 2.7.7.41)	cdsA	ΔG increased	1	1	1	1	1	1	1	1	1	1	1	1	1	1	1	1	1	1	0	0	1	1	1	1	1	1	1	1	1	1	1	1	1	1	2	1	1	1	1	1	1	1	1	1
Membrane Transport	Uni- Sym- and Antiporters	Multi-subunit cation antiporter	Na(+) H(+) antiporter subunit A	mrpA	not well fitted	1	1	1	1	1	1	1	1	1	1	1	1	1	1	1	1	1	1	1	1	1	1	1	1	1	1	1	1	1	1	2	1	1	1	1	1	1	1	1	1	1	1	1	1
Membrane Transport	Uni- Sym- and Antiporters	Multi-subunit cation antiporter	Na(+) H(+) antiporter subunit G	mrpG	not well fitted	1	1	1	1	1	1	1	1	1	1	1	1	1	1	1	1	1	1	1	1	1	1	1	1	1	1	1	1	1	1	2	1	1	1	1	1	1	1	1	1	1	1	1	1
Membrane Transport	Protein translocation across cytoplasmic membrane	Twin-arginine translocation system	Twin-arginine translocation protein TatA	tatA	not well fitted	1	1	1	1	1	1	1	1	1	1	1	1	1	1	1	1	1	1	2	2	1	1	1	1	2	1	1	1	1	1	4	1	1	1	2	2	1	1	1	1	1	1	1	1
Membrane Transport	Protein translocation across cytoplasmic membrane	Twin-arginine translocation system	Twin-arginine translocation protein TatB	tatB	not well fitted	1	1	1	1	1	1	1	2	1	1	1	1	1	1	1	1	1	2	2	2	0	1	1	2	1	1	1	1	1	1	2	1	1	1	1	1	1	1	1	1	1	1	1	1
Membrane Transport	Membrane Transport - no subcategory	ECF class transporters	Duplicated ATPase component YkoD of energizing module of thiamin-regulated ECF transporter for HydroxyMethylPyrimidine	ykoD	not well fitted	1	1	1	1	1	1	1	1	1	1	1	1	1	1	1	1	1	1	1	1	1	1	1	1	1	1	1	2	1	1	1	1	1	1	1	1	1	1	1	1	1	1	1	1
Miscellaneous	Plant-Prokaryote DOE project	Iron-sulfur cluster assembly	Putative iron-sulfur cluster assembly scaffold protein for SUF system, SufE2	nifU	Identical curves	1	1	1	1	1	1	1	1	1	1	1	1	1	1	1	1	1	1	1	1	2	1	1	1	1	1	1	1	1	1	1	1	1	1	1	1	1	1	1	1	1	1	1	1
Miscellaneous	Plant-Prokaryote DOE project	Iron-sulfur cluster assembly	probable iron binding protein from the HesB_IscA_SufA family	erpA	not well fitted	1	1	1	1	1	1	1	1	1	1	1	1	1	1	1	1	1	1	1	1	2	1	1	1	1	1	1	1	1	1	1	1	1	1	1	1	1	1	1	1	1	1	1	1
Miscellaneous	Plant-Prokaryote DOE project	Iron-sulfur cluster assembly	DUF1794	orfB	not well fitted	1	1	1	1	1	1	1	1	1	1	1	1	1	1	1	1	1	1	1	1	1	1	1	1	1	1	1	1	1	1	1	1	1	1	1	1	1	1	1	1	1	1	1	1
Miscellaneous	Plant-Prokaryote DOE project	Iron-sulfur cluster assembly	PaaD-like protein (DUF59) involved in Fe-S cluster assembly	paaD	not well fitted	1	1	1	1	1	1	1	1	1	1	1	1	1	1	1	1	1	1	1	1	2	1	1	1	1	1	1	1	1	1	1	1	1	1	1	1	1	1	1	1	1	1	1	1
Miscellaneous	Plant-Prokaryote DOE project	Iron-sulfur cluster assembly	Sulfur acceptor protein SufE for iron-sulfur cluster assembly	sufE	not well fitted	1	1	0	1	1	1	1	1	1	1	1	1	1	1	1	1	1	1	2	2	1	1	1	1	1	1	1	1	1	1	1	1	1	1	1	1	1	1	1	1	1	1	1	1
Miscellaneous	Plant-Prokaryote DOE project	Iron-sulfur cluster assembly	Iron-sulfur cluster regulator SufR	sufR	not well fitted	1	1	1	1	1	1	1	1	1	1	1	1	1	1	1	1	1	1	1	1	2	1	1	1	1	1	1	1	1	1	1	1	1	1	1	1	1	1	1	1	1	1	1	1
Miscellaneous	Miscellaneous - no subcategory	Broadly distributed proteins not in subsystems	FIG001943: hypothetical protein YajQ	yajQ	not well fitted	1	1	1	1	1	1	1	1	1	1	1	1	1	1	1	1	1	1	1	1	1	1	1	1	1	1	1	1	1	1	1	1	1	1	1	1	1	0	1	1	1	1	1	1
Nitrogen Metabolism	Nitrogen Metabolism - no subcategory	Ammonia assimilation	Glutamate-ammonia-ligase adenylyltransferase (EC 2.7.7.42)	glnE	not well fitted	1	1	1	1	1	1	1	1	2	1	1	1	1	2	1	2	1	1	1	1	1	1	1	1	1	1	1	1	1	1	1	1	1	1	1	1	1	1	1	1	1	1	1	1
Nucleosides and Nucleotides	Detoxification	Nucleoside triphosphate pyrophosphohydrolase MazG	Nucleoside triphosphate pyrophosphohydrolase MazG (EC 3.6.1.8)	mazG	Identical curves	1	1	1	1	1	1	1	1	1	1	1	1	1	1	1	1	1	1	1	1	1	1	1	1	1	1	1	1	1	1	1	1	1	1	1	1	1	1	1	1	1	1	1	1
Nucleosides and Nucleotides	Nucleosides and Nucleotides - no subcategory	Ribonucleotide reduction	Ribonucleotide reductase of class Ib (aerobic), alpha subunit (EC 1.17.4.1)	nrdB	Identical curves	1	2	1	1	1	1	1	1	1	1	1	1	1	1	1	1	1	1	1	1	1	1	1	1	2	1	1	1	1	1	1	1	1	1	1	1	1	1	1	1	1	1	1	1
Nucleosides and Nucleotides	Purines	Purine conversions	Adenylosuccinate synthetase (EC 6.3.4.4)	purA	Identical curves	1	1	1	1	1	1	1	1	1	1	1	1	1	1	1	1	1	1	1	1	1	1	1	1	1	1	1	1	2	1	1	1	1	1	1	1	1	1	1	1	1	1	1	1
Nucleosides and Nucleotides	Purines	De Novo Purine Biosynthesis	Phosphoribosylamine--glycine ligase (EC 6.3.4.13)	purD	Identical curves	1	1	1	1	1	1	1	1	1	1	1	1	1	1	1	1	1	1	0	0	1	1	1	1	1	1	1	1	1	1	1	1	1	1	1	1	1	1	1	1	1	1	1	1
Nucleosides and Nucleotides	Purines	De Novo Purine Biosynthesis	Amidophosphoribosyltransferase (EC 2.4.2.14)	purF	Identical curves	1	1	1	1	1	1	1	1	1	1	1	1	1	1	1	1	1	1	0	0	1	1	1	1	1	1	1	1	1	1	1	1	1	1	1	1	1	1	1	1	1	1	1	1
Nucleosides and Nucleotides	Purines	De Novo Purine Biosynthesis	Phosphoribosylformylglycinamidine synthase, glutamine amidotransferase subunit (EC 6.3.5.3)	purL	Identical curves	1	1	1	1	1	1	1	1	1	1	1	1	1	1	1	1	1	1	0	0	1	1	1	1	1	1	1	1	1	1	1	1	1	1	1	1	1	1	1	1	1	1	1	1
Nucleosides and Nucleotides	Purines	De Novo Purine Biosynthesis	Phosphoribosylformylglycinamidine cyclo-ligase (EC 6.3.3.1)	purM	Identical curves	1	1	1	1	1	1	1	1	2	1	1	1	1	1	1	1	1	1	0	0	1	1	1	1	1	1	1	1	1	1	1	1	1	1	1	1	1	1	1	1	1	1	1	1
Nucleosides and Nucleotides	Pyrimidines	De Novo Pyrimidine Synthesis	Aspartate carbamoyltransferase (EC 2.1.3.2)	pyrB	Identical curves	1	1	1	1	1	1	1	1	1	1	1	1	1	1	1	1	1	1	1	1	1	1	1	1	1	1	1	1	1	1	1	1	1	1	1	1	1	1	1	1	1	1	1	1
Nucleosides and Nucleotides	Pyrimidines	De Novo Pyrimidine Synthesis	Dihydroorotate dehydrogenase (EC 1.3.3.1)	pyrD	Identical curves	1	1	1	1	1	1	1	1	1	1	1	1	1	1	1	1	1	1	1	1	1	1	1	1	1	1	1	1	1	1	1	1	1	1	1	1	1	1	1	1	1	1	1	1
Nucleosides and Nucleotides	Pyrimidines	De Novo Pyrimidine Synthesis	Orotidine 5@1-phosphate decarboxylase (EC 4.1.1.23)	pyrF	Identical curves	1	1	1	1	1	1	1	1	1	1	1	1	1	1	1	1	1	1	1	1	1	1	1	1	1	1	1	1	1	1	1	1	1	1	1	1	1	1	1	1	1	1	1	1
Nucleosides and Nucleotides	Pyrimidines	De Novo Pyrimidine Synthesis	Pyrimidine operon regulatory protein PyrR	pyrR	Identical curves	1	1	1	1	1	1	1	1	1	1	1	1	1	1	1	1	1	1	1	1	1	1	1	1	1	1	1	1	1	1	1	1	1	1	1	1	1	1	1	1	1	1	1	1
Nucleosides and Nucleotides	Pyrimidines	pyrimidine conversions	Cytidylate kinase (EC 2.7.4.25)	cmk	not well fitted	1	1	1	1	1	1	1	1	1	1	1	1	1	1	1	1	1	1	1	1	1	1	1	1	1	1	1	1	1	1	1	1	1	1	1	1	1	1	1	1	1	1	1	1
Nucleosides and Nucleotides	Pyrimidines	pyrimidine conversions	Deoxycytidine triphosphate deaminase (EC 3.5.4.13)	dcd	not well fitted	1	1	1	1	1	2	1	1	1	1	1	1	1	1	1	1	1	1	1	1	1	1	1	1	1	1	1	1	1	1	1	1	1	1	1	1	1	1	1	1	1	1	1	1
Nucleosides and Nucleotides	Purines	Purine conversions	Guanylate kinase (EC 2.7.4.8)	gmk	not well fitted	1	1	1	1	1	1	1	1	1	1	1	1	1	1	1	1	1	2	1	1	1	1	1	1	1	1	1	1	1	1	1	1	1	1	1	1	1	1	1	1	1	1	1	1
Nucleosides and Nucleotides	Nucleosides and Nucleotides - no subcategory	Ribonucleotide reduction	Ribonucleotide reduction protein NrdI	nrdL	not well fitted	1	2	1	1	1	1	1	1	1	1	1	1	1	1	1	1	1	1	1	1	1	1	1	1	2	1	1	1	1	1	1	1	1	1	1	1	1	1	1	1	1	1	1	1
Nucleosides and Nucleotides	Nucleosides and Nucleotides - no subcategory	Ribonucleotide reduction	Ribonucleotide reductase transcriptional regulator NrdR	nrdR	not well fitted	1	1	1	1	1	1	1	1	1	1	1	1	1	1	1	1	1	1	1	1	1	1	1	1	1	1	1	1	1	1	1	1	1	1	1	1	1	1	1	1	1	1	1	1
Nucleosides and Nucleotides	Detoxification	Nudix proteins (nucleoside triphosphate hydrolases)	NADH pyrophosphatase (EC 3.6.1.22)	nudC	not well fitted	1	1	1	1	1	1	1	1	1	1	1	1	1	2	1	1	1	1	1	1	1	1	1	1	1	1	1	1	1	1	1	1	1	1	1	1	1	1	1	1	1	1	1	1
Nucleosides and Nucleotides	Purines	De Novo Purine Biosynthesis	Phosphoribosylaminoimidazole-succinocarboxamide synthase (EC 6.3.2.6)	purC	not well fitted	1	1	1	1	1	1	1	1	1	1	1	1	1	1	1	1	1	1	0	0	1	1	1	1	1	1	1	1	1	1	1	1	1	1	1	1	1	1	1	1	1	1	1	1
Nucleosides and Nucleotides	Purines	De Novo Purine Biosynthesis	Phosphoribosylaminoimidazole carboxylase catalytic subunit (EC 4.1.1.21)	purE	not well fitted	1	1	1	1	1	1	1	1	1	1	1	1	1	1	1	1	1	1	0	0	1	1	1	1	1	1	1	1	1	1	1	1	1	1	1	1	1	1	1	1	1	1	1	1
Nucleosides and Nucleotides	Pyrimidines	De Novo Pyrimidine Synthesis	Orotate phosphoribosyltransferase (EC 2.4.2.10)	pyrE	not well fitted	1	1	1	1	1	1	1	1	1	1	1	1	1	1	1	1	1	1	1	1	1	1	2	1	1	1	1	1	1	1	1	1	1	1	1	1	1	1	1	1	1	1	1	1
Nucleosides and Nucleotides	Pyrimidines	pyrimidine conversions	Thymidine kinase (EC 2.7.1.21)	tdk	not well fitted	1	1	1	1	1	1	1	1	1	1	1	2	1	1	1	1	1	1	1	1	1	1	1	1	2	1	1	1	1	1	1	1	1	1	1	1	1	1	1	1	1	1	1	1
Nucleosides and Nucleotides	Purines	Purine conversions	Nucleotide pyrophosphatase (EC 3.6.1.9)	yhdE	not well fitted	1	1	1	1	1	1	1	1	1	1	1	1	1	1	1	1	1	1	1	1	1	1	1	1	1	1	1	1	1	1	1	1	1	1	1	1	1	1	1	1	1	1	1	1
Nucleosides and Nucleotides	Purines	De Novo Purine Biosynthesis	Phosphoribosylaminoimidazole carboxylase ATPase subunit (EC 4.1.1.21)	purK	ΔG increased	1	1	1	1	1	1	1	1	2	1	1	1	1	1	1	1	1	1	0	0	1	1	1	1	1	1	1	1	1	1	1	1	1	1	1	1	1	1	1	1	1	1	1	1
Phosphorus Metabolism	Phosphorus Metabolism - no subcategory	Phosphate metabolism	Phosphate transport regulator (distant homolog of PhoU)	phoU	Identical curves	1	1	1	1	1	1	1	1	1	1	1	1	1	1	1	1	1	1	1	1	1	1	1	1	1	1	1	1	1	1	1	1	1	1	1	1	1	1	1	1	1	1	1	1
Phosphorus Metabolism	Phosphorus Metabolism - no subcategory	Phosphate metabolism	Predicted ATPase related to phosphate starvation-inducible protein PhoH	phoH	ΔG increased	1	1	1	1	1	1	1	1	1	1	1	1	1	1	1	1	1	1	1	1	1	1	1	1	1	1	1	1	1	1	1	1	1	1	1	1	1	1	1	1	1	1	1	1
Phosphorus Metabolism	Phosphorus Metabolism - no subcategory	Phosphate metabolism	Inorganic pyrophosphatase (EC 3.6.1.1)	ppa	ΔG increased	1	1	1	1	1	1	1	1	1	1	1	1	1	1	1	1	1	1	1	1	1	1	1	1	1	1	1	1	1	1	1	1	1	1	1	1	1	1	1	1	1	1	1	1
Protein Metabolism	Protein biosynthesis	Universal GTPases	GTP-binding protein Era	era	Identical curves	1	1	1	1	1	1	1	1	1	1	1	1	1	1	1	1	1	1	1	1	1	1	1	1	1	1	1	1	1	1	1	1	1	1	1	1	1	1	1	1	1	1	1	1
Protein Metabolism	Protein biosynthesis	tRNA aminoacylation, Asp and Asn	Aspartyl-tRNA(Asn) amidotransferase subunit C (EC 6.3.5.6)	gatC	Identical curves	1	1	1	1	1	1	1	1	1	1	1	1	1	1	1	1	1	1	1	1	1	1	1	1	1	1	1	1	1	1	1	1	1	1	1	1	1	1	1	1	1	1	1	1
Protein Metabolism	Protein biosynthesis	tRNA aminoacylation, Ile	Isoleucyl-tRNA synthetase (EC 6.1.1.5)	ileS	Identical curves	1	1	1	1	1	1	1	1	2	1	1	1	1	2	1	1	1	1	1	1	1	1	1	1	1	1	1	1	1	1	1	1	1	1	1	1	1	1	1	1	0	1	1	1
Protein Metabolism	Protein biosynthesis	tRNA aminoacylation, Leu	Leucyl-tRNA synthetase (EC 6.1.1.4)	leuS	Identical curves	1	1	1	1	1	1	1	1	1	1	1	1	1	1	1	1	1	1	1	1	1	1	1	1	1	1	1	1	1	1	1	1	1	1	1	1	1	1	1	1	1	1	1	1
Protein Metabolism	Protein biosynthesis	tRNA aminoacylation, Met	Methionyl-tRNA synthetase (EC 6.1.1.10)	metG	Identical curves	1	1	1	1	1	1	1	1	1	1	1	1	1	1	1	1	1	1	1	1	1	1	1	1	1	1	1	1	1	1	1	1	1	1	1	1	1	1	1	1	1	1	1	1
Protein Metabolism	Protein biosynthesis	Translation termination factors bacterial	Peptide chain release factor 1	MRF1	Identical curves	1	1	1	1	1	1	1	1	1	1	1	1	1	1	1	1	1	1	1	1	1	1	1	1	1	1	1	1	1	1	1	1	1	1	1	1	1	1	1	1	1	1	1	1
Protein Metabolism	Protein degradation	Proteasome archaeal	Pup ligase PafA, possible component of postulated heterodimer PafA-PafA@1	pafA	Identical curves	1	1	1	1	1	1	1	1	1	1	1	1	1	1	1	1	1	1	1	1	1	1	1	1	1	1	1	1	1	1	1	1	1	1	1	1	1	1	1	1	1	1	1	1
Protein Metabolism	Protein degradation	Proteasome archaeal	Proteasome subunit beta (EC 3.4.25.1), bacterial	prcB	Identical curves	1	1	1	1	1	1	1	1	1	1	1	1	1	1	1	1	1	1	1	1	1	1	1	1	1	1	1	1	1	1	1	1	1	1	1	1	1	1	1	1	1	1	1	1
Protein Metabolism	Protein biosynthesis	Universal GTPases	GTP-binding and nucleic acid-binding protein YchF	ychF	Identical curves	1	1	1	1	1	1	1	1	1	1	1	1	1	1	1	1	1	1	1	1	1	1	1	1	1	1	1	1	1	1	1	1	1	1	1	1	1	1	1	1	1	1	1	1
Protein Metabolism	Protein biosynthesis	tRNA aminoacylation, Asp and Asn	Aspartyl-tRNA(Asn) synthetase (EC 6.1.1.23)	aspS2	not well fitted	1	1	1	1	1	1	1	1	1	1	1	1	1	1	1	1	1	1	1	1	1	1	1	1	1	1	1	1	1	1	1	1	1	1	1	1	1	1	1	1	1	1	1	1
Protein Metabolism	Protein degradation	Proteolysis in bacteria, ATP-dependent	ATP-dependent Clp protease adaptor protein ClpS	clpS	not well fitted	1	1	1	2	1	1	1	1	1	1	1	1	1	1	1	1	1	1	1	1	1	1	2	1	1	1	1	2	1	1	1	1	1	1	1	1	1	1	1	2	1	1	1	1
Protein Metabolism	Protein biosynthesis	Translation elongation factors bacterial	Translation elongation factor P	efp	not well fitted	1	1	1	1	1	1	1	1	1	1	1	1	1	1	1	1	1	1	1	1	1	1	1	1	1	1	1	1	1	1	1	1	1	1	1	1	1	1	1	1	1	1	1	1
Protein Metabolism	Protein biosynthesis	Universal GTPases	GTP-binding protein EngA	engA	not well fitted	1	1	1	1	1	1	1	1	1	1	1	1	1	2	1	1	1	1	1	1	1	1	1	1	1	1	1	1	1	1	1	1	1	1	1	1	1	1	1	1	1	1	1	1
Protein Metabolism	Protein biosynthesis	Universal GTPases	Ribosome small subunit-stimulated GTPase EngC	engC	not well fitted	1	1	1	1	1	1	1	1	1	1	1	1	1	1	1	1	1	1	1	1	1	1	1	1	1	1	1	1	1	1	1	1	1	1	1	1	1	1	1	1	1	1	1	1
Protein Metabolism	Protein biosynthesis	tRNA aminoacylation, Asp and Asn	Aspartyl-tRNA(Asn) amidotransferase subunit B (EC 6.3.5.6)	gatB	not well fitted	1	1	1	1	1	1	1	1	1	1	1	1	1	1	1	1	1	1	1	1	1	1	1	1	1	1	1	1	1	1	1	1	1	1	1	1	1	1	1	1	1	1	1	1
Protein Metabolism	Protein biosynthesis	tRNA aminoacylation, Glu and Gln	Glutamyl-tRNA(Gln) synthetase (EC 6.1.1.24)	gltX	not well fitted	1	1	1	1	1	1	1	1	1	1	1	1	1	1	1	1	1	1	1	1	1	1	1	1	1	1	1	1	1	1	1	1	1	1	1	1	1	1	1	1	1	1	1	1
Protein Metabolism	Protein biosynthesis	tRNA aminoacylation, Gly	Glycyl-tRNA synthetase (EC 6.1.1.14)	glyQS	not well fitted	1	1	1	1	1	1	1	1	1	1	1	1	1	1	1	1	1	1	1	1	1	1	1	1	1	1	1	1	1	1	1	1	1	1	1	1	1	1	1	1	1	1	1	1
Protein Metabolism	Protein folding	GroEL GroES	Heat shock protein 60 family co-chaperone GroES	groES	not well fitted	1	1	1	1	1	1	1	1	1	1	1	1	1	1	1	1	1	1	1	1	2	1	1	1	1	1	1	1	1	1	1	1	1	1	1	1	1	1	1	1	1	1	1	1
Protein Metabolism	Protein biosynthesis	tRNA aminoacylation, Lys	Lysyl-tRNA synthetase (class II) (EC 6.1.1.6)	lysU	not well fitted	1	1	1	1	1	1	1	1	1	1	1	1	1	1	1	1	1	1	1	1	1	1	1	1	1	1	1	1	1	1	1	1	1	1	1	1	1	1	1	1	1	1	1	1
Protein Metabolism	Protein processing and modification	Peptide methionine sulfoxide reductase	Peptide methionine sulfoxide reductase MsrA (EC 1.8.4.11)	msrA	not well fitted	1	1	1	1	1	1	1	1	1	1	1	1	1	1	1	1	1	1	1	1	1	1	1	1	1	1	0	1	1	1	1	1	1	1	1	1	1	1	1	1	1	2	1	1
Protein Metabolism	Protein processing and modification	Peptide methionine sulfoxide reductase	Peptide methionine sulfoxide reductase MsrB (EC 1.8.4.12)	msrB	not well fitted	1	1	1	1	1	1	1	1	1	1	1	1	1	1	1	1	1	1	1	1	1	1	1	1	1	1	1	1	1	1	1	1	1	1	1	1	1	1	1	1	1	2	1	1
Protein Metabolism	Protein biosynthesis	Universal GTPases	GTP-binding protein Obg	obg	not well fitted	1	1	1	1	1	1	1	1	2	1	1	1	1	1	1	1	1	1	1	1	1	1	1	1	1	1	1	1	1	1	1	1	1	1	1	1	1	1	1	1	1	1	1	1
Protein Metabolism	Protein biosynthesis	tRNA aminoacylation, Phe	Phenylalanyl-tRNA synthetase beta chain (EC 6.1.1.20)	pheT	not well fitted	1	1	1	1	1	1	1	1	2	1	1	1	1	0	1	1	1	1	1	1	1	1	1	1	1	1	1	1	1	1	1	1	1	1	1	1	1	1	1	1	1	1	1	1
Protein Metabolism	Protein degradation	Proteasome archaeal	Proteasome subunit alpha (EC 3.4.25.1), bacterial	prcA	not well fitted	1	1	1	1	1	1	1	1	1	1	1	1	1	1	1	1	1	1	1	1	1	1	1	1	1	1	1	1	1	1	1	1	1	1	1	1	1	1	1	1	1	1	1	1
Protein Metabolism	Protein biosynthesis	tRNA aminoacylation, Pro	Prolyl-tRNA synthetase (EC 6.1.1.15), bacterial type	proS	not well fitted	1	1	1	1	1	1	1	1	1	1	1	1	1	1	1	1	1	1	1	1	1	1	1	1	1	1	1	1	1	1	1	1	1	1	1	1	1	1	1	1	1	1	1	1
Protein Metabolism	Protein biosynthesis	Translation initiation factors bacterial	Ribosome-binding factor A	rbfA	not well fitted	1	1	1	1	1	1	1	1	1	1	1	1	1	1	1	1	1	1	0	0	0	1	1	1	1	1	1	1	1	1	1	1	1	1	1	1	1	1	1	1	1	1	1	1
Protein Metabolism	Protein biosynthesis	Ribosome biogenesis bacterial	Ribosomal-protein-S18p-alanine acetyltransferase (EC 2.3.1.-)	rimI	not well fitted	1	1	1	1	1	1	1	1	1	1	1	1	1	1	1	1	1	1	1	1	1	1	1	1	1	1	1	1	1	1	1	1	1	1	1	1	1	1	1	1	1	1	1	1
Protein Metabolism	Protein biosynthesis	Ribosome biogenesis bacterial	16S rRNA processing protein RimM	rimM	not well fitted	1	1	1	1	1	1	1	1	2	1	1	1	1	0	1	1	1	1	1	1	1	1	1	1	1	1	1	1	1	1	1	1	2	1	1	1	1	1	1	1	1	1	1	1
Protein Metabolism	Protein biosynthesis	Translation elongation factors bacterial	Translation elongation factor Ts	tsf	not well fitted	1	1	1	1	1	1	1	1	1	1	1	1	1	1	1	1	1	1	1	1	1	1	1	1	1	1	1	1	1	1	1	1	1	1	1	1	1	1	1	1	1	1	1	1
Protein Metabolism	Protein biosynthesis	Universal GTPases	GTP-binding protein TypA/BipA	typA	not well fitted	1	1	1	1	1	1	1	1	1	1	1	1	1	1	1	1	1	1	1	1	1	1	1	1	1	1	1	1	1	1	1	1	1	1	1	1	1	1	1	1	1	1	1	1
Protein Metabolism	Protein biosynthesis	tRNA aminoacylation, Val	Valyl-tRNA synthetase (EC 6.1.1.9)	valS	not well fitted	1	1	1	1	1	1	1	1	2	1	1	1	1	1	1	1	1	1	1	1	1	1	1	1	1	1	1	1	1	1	1	1	2	1	1	1	1	1	1	1	1	1	1	1
Protein Metabolism	Protein biosynthesis	tRNA aminoacylation, Asp and Asn	Aspartyl-tRNA synthetase (EC 6.1.1.12)	aspS	ΔG increased	1	1	1	1	1	1	1	1	1	1	1	1	1	1	1	1	1	1	1	1	1	1	1	1	1	1	1	1	1	1	1	1	1	1	1	1	1	1	1	1	1	1	1	1
Protein Metabolism	Protein degradation	Serine endopeptidase (EC 3.4.21.-)	Prolyl endopeptidase (EC 3.4.21.26)	f1pep1	ΔG increased	1	1	1	1	1	1	1	1	1	1	1	1	1	1	1	1	1	1	1	1	1	1	1	1	1	1	1	1	1	1	1	1	2	1	1	1	1	1	1	1	1	1	1	1
Protein Metabolism	Protein biosynthesis	Translation initiation factors bacterial	Methionyl-tRNA formyltransferase (EC 2.1.2.9)	fmt	ΔG increased	1	1	1	1	1	1	1	1	1	1	1	1	1	1	1	1	1	1	0	0	0	1	1	1	1	1	1	1	1	1	1	1	1	1	1	1	1	1	1	1	1	1	1	1
Protein Metabolism	Protein degradation	Proteasome archaeal	Prokaryotic ubiquitin-like protein Pup	pup	ΔG increased	1	1	1	1	1	1	1	1	1	1	1	1	1	1	1	1	1	1	1	1	1	1	1	1	1	1	1	1	1	1	1	1	1	1	1	1	1	1	1	1	1	1	1	1
Protein Metabolism	Protein biosynthesis	tRNA aminoacylation, Thr	Threonyl-tRNA synthetase (EC 6.1.1.3)	thrS	ΔG increased	1	1	1	1	1	1	1	1	1	1	1	1	1	1	1	1	1	1	1	1	1	1	1	1	1	1	1	1	1	1	1	1	1	1	1	1	1	1	1	1	1	1	1	1
Respiration	Electron accepting reactions	Terminal cytochrome C oxidases	Cytochrome c oxidase polypeptide III (EC 1.9.3.1)	COX3	not well fitted	2	1	1	1	1	1	1	1	1	1	1	1	1	1	1	1	1	1	1	1	1	1	1	1	1	1	1	1	1	1	1	1	1	1	1	1	1	1	1	1	1	1	1	1
Respiration	Electron accepting reactions	Ubiquinone Menaquinone-cytochrome c reductase complexes	ubiquinol cytochrome C oxidoreductase, cytochrome C1 subunit	adhB	not well fitted	1	1	1	1	1	1	1	1	1	1	1	1	1	1	1	1	1	1	1	1	1	1	1	1	1	1	1	1	1	1	1	1	1	1	1	1	1	1	1	1	1	1	1	1
Respiration	Electron accepting reactions	Ubiquinone Menaquinone-cytochrome c reductase complexes	Ubiquinol-cytochrome C reductase iron-sulfur subunit (EC 1.10.2.2)	petA	not well fitted	1	1	1	1	1	1	1	1	1	1	1	1	1	1	1	1	1	1	1	1	1	1	1	1	1	1	1	1	1	1	1	1	1	1	1	1	1	1	1	1	1	1	1	1
Respiration	Electron donating reactions	Succinate dehydrogenase	Succinate dehydrogenase cytochrome b-556 subunit	sdhC_2	not well fitted	1	1	1	1	1	1	1	1	1	1	1	1	1	1	1	1	1	1	1	1	1	1	1	1	1	1	1	1	1	1	1	1	1	1	1	1	1	1	1	1	1	1	1	1
Respiration	Respiration - no subcategory	Biogenesis of cytochrome c oxidases	Heme O synthase, protoheme IX farnesyltransferase (EC 2.5.1.-) COX10-CtaB	ctaB	ΔG increased	1	1	1	1	1	1	1	1	1	1	1	1	1	1	1	1	1	1	1	1	1	1	1	1	2	1	1	1	1	1	1	1	1	1	1	1	1	1	1	1	1	1	1	1
RNA Metabolism	RNA processing and modification	RNA methylation	rRNA small subunit 7-methylguanosine (m7G) methyltransferase GidB	gidB	Identical curves	1	1	1	1	1	1	1	1	1	1	1	1	1	1	1	1	1	1	1	1	1	1	1	1	1	1	1	1	1	1	1	1	1	1	1	1	1	1	1	1	1	1	1	1
RNA Metabolism	Transcription	Transcription factors bacterial	Transcription-repair coupling factor	mfd	Identical curves	1	1	1	1	1	1	1	1	2	1	1	1	1	1	1	1	1	1	1	1	1	1	1	1	1	1	1	1	1	1	1	1	1	1	1	1	1	1	1	1	1	1	1	1
RNA Metabolism	Transcription	Transcription factors bacterial	Transcription termination protein NusA	nusA	Identical curves	1	1	1	1	1	1	1	1	1	1	1	1	1	1	1	1	1	1	1	1	1	1	1	1	1	1	1	1	1	1	1	1	1	1	1	1	1	1	1	1	1	1	1	1
RNA Metabolism	Transcription	Transcription factors bacterial	Transcription antitermination protein NusG	nusG	Identical curves	1	1	1	1	1	1	1	1	1	1	1	1	1	1	1	1	1	1	1	1	1	1	1	1	1	1	1	1	1	1	1	1	1	1	1	1	1	1	1	1	1	1	1	1
RNA Metabolism	RNA processing and modification	Ribonucleases in Bacillus	Ribonuclease J2 (endoribonuclease in RNA processing)	rnj2	Identical curves	1	1	1	1	1	1	2	1	2	1	1	1	1	2	1	1	1	2	2	2	2	1	1	2	2	1	2	1	1	1	2	1	2	2	1	1	1	2	1	1	1	1	1	1
RNA Metabolism	Transcription	Transcription factors bacterial	Transcription elongation factor GreA	greA	not well fitted	1	1	1	1	1	1	0	1	1	1	1	1	1	1	1	1	1	1	1	1	1	1	1	1	1	1	1	1	1	1	1	1	1	1	1	1	1	1	1	1	1	1	1	1
RNA Metabolism	Transcription	Transcription factors bacterial	Transcription termination protein NusB	nusB	not well fitted	1	1	1	1	1	1	1	1	1	1	1	1	1	1	1	1	1	1	1	1	1	1	1	1	1	1	1	1	1	1	1	1	1	1	1	1	1	1	1	1	1	1	1	1
RNA Metabolism	RNA processing and modification	RNA processing and degradation, bacterial	3@1-to-5@1 oligoribonuclease (orn)	orn	not well fitted	1	2	1	1	1	1	1	1	1	1	1	1	1	1	1	1	1	1	1	1	1	1	1	1	1	1	2	1	1	1	1	1	1	1	1	1	1	1	1	1	1	1	1	1
RNA Metabolism	Transcription	Transcription factors bacterial	Transcription termination factor Rho	rho	not well fitted	1	1	1	1	1	1	1	1	1	1	1	1	1	1	1	1	1	1	1	1	1	1	1	1	1	1	1	1	1	1	1	1	1	1	1	1	1	1	1	1	1	1	1	1
RNA Metabolism	RNA processing and modification	tRNA processing	Ribonuclease D (EC 3.1.26.3)	rnc	not well fitted	1	1	1	1	1	1	1	1	1	1	1	1	1	1	1	1	1	1	1	1	1	1	1	1	1	1	1	1	1	1	1	1	1	1	1	1	1	1	1	1	1	1	1	1
RNA Metabolism	Transcription	RNA polymerase bacterial	DNA-directed RNA polymerase alpha subunit (EC 2.7.7.6)	rpoA	not well fitted	1	1	1	1	1	1	1	1	1	1	1	1	1	1	1	1	1	1	1	1	1	1	1	1	1	1	1	1	1	1	1	1	1	1	1	1	1	1	1	1	1	1	1	1
RNA Metabolism	Transcription	RNA polymerase bacterial	DNA-directed RNA polymerase omega subunit (EC 2.7.7.6)	rpoZ	not well fitted	1	1	1	1	1	1	1	1	1	1	1	1	1	1	1	1	1	1	1	1	1	1	1	1	1	1	1	1	1	1	1	1	1	1	1	1	1	1	1	1	1	1	1	1
RNA Metabolism	RNA processing and modification	RNA processing orphans	2H phosphoesterase superfamily protein Bsu1186 (yjcG)	yjcG	not well fitted	1	1	1	1	1	1	1	1	1	1	1	1	1	1	1	1	1	1	1	1	1	1	1	1	1	1	1	1	1	1	1	1	1	1	1	1	1	1	1	1	1	1	1	1
RNA Metabolism	RNA processing and modification	tRNA nucleotidyltransferase	tRNA nucleotidyltransferase (EC 2.7.7.21) (EC 2.7.7.25)	papS	ΔG increased	1	2	1	1	1	1	1	1	1	1	1	1	1	1	1	2	2	1	1	1	1	1	1	1	1	1	1	1	1	1	1	1	1	1	1	1	1	1	1	1	1	1	1	1
RNA Metabolism	RNA processing and modification	Queuosine-Archaeosine Biosynthesis	Peptidyl-prolyl cis-trans isomerase (EC 5.2.1.8)	PPIA	ΔG increased	1	1	1	1	1	1	1	1	1	1	1	1	1	1	1	1	1	1	1	1	0	1	2	1	2	1	1	2	2	2	1	1	1	1	1	1	2	1	1	1	1	2	1	1
RNA Metabolism	RNA processing and modification	RNA methylation	23S rRNA (guanosine-2@1-O-) -methyltransferase rlmB (EC 2.1.1.-)	rlmB	ΔG increased	1	1	1	1	1	1	1	1	1	1	1	1	1	1	1	1	1	1	1	1	1	1	1	1	1	1	1	1	1	1	1	1	1	1	1	1	1	1	1	1	1	1	1	1
RNA Metabolism	RNA processing and modification	RNA methylation	Ribosomal RNA large subunit methyltransferase A (EC 2.1.1.51)	rrmA	ΔG increased	1	1	1	1	1	1	1	1	1	1	1	1	1	1	1	1	1	1	1	1	1	1	1	1	1	1	1	1	1	1	1	1	1	1	1	1	1	1	1	1	1	1	1	1
RNA Metabolism	RNA processing and modification	16S rRNA modification within P site of ribosome	rRNA small subunit methyltransferase H	rsmH	ΔG increased	1	1	1	1	1	1	1	1	1	1	1	1	1	1	1	1	1	1	1	1	1	1	1	1	1	1	1	1	1	1	1	1	1	1	1	1	1	1	1	1	1	1	1	1
Stress Response	Stress Response - no subcategory	Bacterial hemoglobins	Hemoglobin-like protein HbO	hbO	Identical curves	1	1	1	1	1	1	1	1	1	1	1	1	1	1	1	1	1	1	1	1	1	1	1	1	1	1	1	1	1	1	1	1	1	1	1	1	1	1	1	1	1	1	1	1
Stress Response	Oxidative stress	Oxidative stress	Transcriptional regulator, FUR family	furA	not well fitted	1	1	1	1	1	1	2	1	1	1	1	1	1	2	1	1	1	1	2	2	2	1	1	2	2	1	2	1	1	1	1	1	1	2	1	1	1	1	1	1	1	1	1	1
Stress Response	Osmotic stress	Choline and Betaine Uptake and Betaine Biosynthesis	Glycine betaine ABC transport system permease protein	proW	not well fitted	1	1	1	1	1	2	1	2	1	1	1	1	1	1	1	1	1	1	1	1	1	1	1	1	1	1	1	1	1	1	1	1	1	1	1	1	1	1	1	1	1	2	1	1
Stress Response	Oxidative stress	Oxidative stress	Redox-sensitive transcriptional regulator (AT-rich DNA-binding protein)	rex_1	not well fitted	1	1	1	1	1	1	1	1	1	1	1	1	1	1	1	1	1	1	1	1	1	1	1	1	1	1	1	1	1	1	1	1	1	1	1	1	1	1	1	1	1	1	1	1
Stress Response	Cold shock	Cold shock, CspA family of proteins	Cold shock protein CspC	cspC	ΔG increased	1	1	1	1	1	1	1	2	1	1	1	1	1	1	1	1	1	1	1	1	1	1	1	1	1	1	1	1	1	1	1	1	1	1	1	1	1	1	1	1	1	1	1	1
Stress Response	Osmotic stress	Choline and Betaine Uptake and Betaine Biosynthesis	L-proline glycine betaine binding ABC transporter protein ProX (TC 3.A.1.12.1)	proX	ΔG increased	1	1	1	1	1	2	1	2	1	1	1	1	1	1	2	1	1	1	2	2	2	1	1	2	2	1	1	1	1	1	1	1	2	2	1	1	1	1	1	1	1	2	1	1
Virulence, Disease and Defense	Resistance to antibiotics and toxic compounds	Resistance to fluoroquinolones	DNA gyrase subunit A (EC 5.99.1.3)	gyrA	Identical curves	2	2	2	2	2	2	2	2	4	2	2	2	2	2	2	2	2	2	2	2	2	2	4	2	2	2	2	2	2	2	2	2	2	2	2	2	2	2	2	2	2	2	2	2
Virulence, Disease and Defense	Invasion and intracellular resistance	Mycobacterium virulence operon involved in protein synthesis (SSU ribosomal proteins)	Translation elongation factor G	EF-G	Identical curves	4	4	4	4	4	4	4	4	4	4	4	4	4	4	4	4	4	4	4	4	6	4	4	4	4	4	4	4	4	4	4	4	4	4	4	4	4	4	4	4	4	4	4	4
Virulence, Disease and Defense	Invasion and intracellular resistance	Mycobacterium virulence operon involved in an unknown function with a Jag Protein and YidC and YidD	RNA-binding protein Jag	jag	not well fitted	1	1	1	1	1	1	1	1	1	1	1	1	1	1	1	1	1	1	1	1	1	1	1	1	1	1	1	1	1	1	1	1	1	1	1	1	1	1	1	1	1	1	1	1
[truncated: 62 more columns]

## Sheet: stability equations
GCA_000014925.betaGalactosidase:Delta G(T) = -281.7 *(1-(T+273.15)/ 331.11 )+ 5.58 *( 58 -T)+ 5.58 *(T+273.15)*log((T+273.15)/ 331.11 )
GCA_000022025.betaGalactosidase:Delta G(T) = -267.9 *(1-(T+273.15)/ 342.07 )+ 5.37 *( 68.9 -T)+ 5.37 *(T+273.15)*log((T+273.15)/ 342.07 )
GCA_000189535.betaGalactosidase:Delta G(T) = -197.4 *(1-(T+273.15)/ 336.7 )+ 5.03 *( 63.5 -T)+ 5.03 *(T+273.15)*log((T+273.15)/ 336.7 )
GCA_000196235.betaGalactosidase:Delta G(T) = -221.4 *(1-(T+273.15)/ 347.31 )+ 5.53 *( 74.2 -T)+ 5.53 *(T+273.15)*log((T+273.15)/ 347.31 )
GCA_000238915.betaGalactosidase:Delta G(T) = -196.6 *(1-(T+273.15)/ 336.05 )+ 3.84 *( 62.9 -T)+ 3.84 *(T+273.15)*log((T+273.15)/ 336.05 )
GCA_000281065.betaGalactosidase:Delta G(T) = -245.6 *(1-(T+273.15)/ 335.35 )+ 5.78 *( 62.2 -T)+ 5.78 *(T+273.15)*log((T+273.15)/ 335.35 )
GCA_000294695.betaGalactosidase:Delta G(T) = -273.5 *(1-(T+273.15)/ 333.7 )+ 6.07 *( 60.6 -T)+ 6.07 *(T+273.15)*log((T+273.15)/ 333.7 )
GCA_000332815.betaGalactosidase:Delta G(T) = -231.8 *(1-(T+273.15)/ 336.75 )+ 4.52 *( 63.6 -T)+ 4.52 *(T+273.15)*log((T+273.15)/ 336.75 )
GCA_000374865.betaGalactosidase:Delta G(T) = -255.4 *(1-(T+273.15)/ 340.89 )+ 5.24 *( 67.7 -T)+ 5.24 *(T+273.15)*log((T+273.15)/ 340.89 )
GCA_000374905.betaGalactosidase:Delta G(T) = -231.2 *(1-(T+273.15)/ 340.19 )+ 5.09 *( 67 -T)+ 5.09 *(T+273.15)*log((T+273.15)/ 340.19 )
GCA_000374945.betaGalactosidase:Delta G(T) = -245.6 *(1-(T+273.15)/ 337.69 )+ 6.02 *( 64.5 -T)+ 6.02 *(T+273.15)*log((T+273.15)/ 337.69 )
GCA_000482545.betaGalactosidase:Delta G(T) = -199.1 *(1-(T+273.15)/ 349.02 )+ 4.85 *( 75.9 -T)+ 4.85 *(T+273.15)*log((T+273.15)/ 349.02 )
GCA_000514015.betaGalactosidase:Delta G(T) = -166.9 *(1-(T+273.15)/ 347.92 )+ 4.13 *( 74.8 -T)+ 4.13 *(T+273.15)*log((T+273.15)/ 347.92 )
GCA_000514155.betaGalactosidase:Delta G(T) = -245.2 *(1-(T+273.15)/ 341.53 )+ 5.15 *( 68.4 -T)+ 5.15 *(T+273.15)*log((T+273.15)/ 341.53 )
GCA_000520555.betaGalactosidase:Delta G(T) = -218.6 *(1-(T+273.15)/ 339.02 )+ 5.02 *( 65.9 -T)+ 5.02 *(T+273.15)*log((T+273.15)/ 339.02 )
GCA_000520575.betaGalactosidase:Delta G(T) = -218.6 *(1-(T+273.15)/ 339.02 )+ 5.02 *( 65.9 -T)+ 5.02 *(T+273.15)*log((T+273.15)/ 339.02 )
GCA_000520595.betaGalactosidase:Delta G(T) = -219 *(1-(T+273.15)/ 345.86 )+ 3.96 *( 72.7 -T)+ 3.96 *(T+273.15)*log((T+273.15)/ 345.86 )
GCA_000685965.betaGalactosidase:Delta G(T) = -226.6 *(1-(T+273.15)/ 341.78 )+ 5.6 *( 68.6 -T)+ 5.6 *(T+273.15)*log((T+273.15)/ 341.78 )
GCA_000755585.betaGalactosidase:Delta G(T) = -168.4 *(1-(T+273.15)/ 342.31 )+ 3.81 *( 69.2 -T)+ 3.81 *(T+273.15)*log((T+273.15)/ 342.31 )
GCA_000785535.betaGalactosidase:Delta G(T) = -158.9 *(1-(T+273.15)/ 339.88 )+ 3.34 *( 66.7 -T)+ 3.34 *(T+273.15)*log((T+273.15)/ 339.88 )
GCA_000813845.betaGalactosidase:Delta G(T) = -229.5 *(1-(T+273.15)/ 343.34 )+ 5.81 *( 70.2 -T)+ 5.81 *(T+273.15)*log((T+273.15)/ 343.34 )
GCA_000816565.betaGalactosidase:Delta G(T) = -204.3 *(1-(T+273.15)/ 340.95 )+ 4.82 *( 67.8 -T)+ 4.82 *(T+273.15)*log((T+273.15)/ 340.95 )
GCA_000876655.betaGalactosidase:Delta G(T) = -220.3 *(1-(T+273.15)/ 345.23 )+ 5.66 *( 72.1 -T)+ 5.66 *(T+273.15)*log((T+273.15)/ 345.23 )
GCA_000962805.betaGalactosidase:Delta G(T) = -253.6 *(1-(T+273.15)/ 337.24 )+ 5.41 *( 64.1 -T)+ 5.41 *(T+273.15)*log((T+273.15)/ 337.24 )
GCA_001046895.betaGalactosidase:Delta G(T) = -231.7 *(1-(T+273.15)/ 339.59 )+ 5.11 *( 66.4 -T)+ 5.11 *(T+273.15)*log((T+273.15)/ 339.59 )
GCA_001187915.betaGalactosidase:Delta G(T) = -129.9 *(1-(T+273.15)/ 334.37 )+ 2.72 *( 61.2 -T)+ 2.72 *(T+273.15)*log((T+273.15)/ 334.37 )
GCA_001238605.betaGalactosidase:Delta G(T) = -256.1 *(1-(T+273.15)/ 344.75 )+ 6.19 *( 71.6 -T)+ 6.19 *(T+273.15)*log((T+273.15)/ 344.75 )
GCA_001281315.betaGalactosidase:Delta G(T) = -187.4 *(1-(T+273.15)/ 342.73 )+ 4.41 *( 69.6 -T)+ 4.41 *(T+273.15)*log((T+273.15)/ 342.73 )
GCA_001294625.betaGalactosidase:Delta G(T) = -187.6 *(1-(T+273.15)/ 334.5 )+ 2.69 *( 61.3 -T)+ 2.69 *(T+273.15)*log((T+273.15)/ 334.5 )
GCA_001307035.betaGalactosidase:Delta G(T) = -231.5 *(1-(T+273.15)/ 336.53 )+ 2.88 *( 63.4 -T)+ 2.88 *(T+273.15)*log((T+273.15)/ 336.53 )
GCA_001373495.betaGalactosidase:Delta G(T) = -264.2 *(1-(T+273.15)/ 339.21 )+ 1.71 *( 66.1 -T)+ 1.71 *(T+273.15)*log((T+273.15)/ 339.21 )
GCA_001422665.betaGalactosidase:Delta G(T) = -225.5 *(1-(T+273.15)/ 338.27 )+ 4.04 *( 65.1 -T)+ 4.04 *(T+273.15)*log((T+273.15)/ 338.27 )
GCA_001423525.betaGalactosidase:Delta G(T) = -246.6 *(1-(T+273.15)/ 333.85 )+ 4.99 *( 60.7 -T)+ 4.99 *(T+273.15)*log((T+273.15)/ 333.85 )
GCA_001423745.betaGalactosidase:Delta G(T) = -243.8 *(1-(T+273.15)/ 339.64 )+ 5.32 *( 66.5 -T)+ 5.32 *(T+273.15)*log((T+273.15)/ 339.64 )
GCA_001424565.betaGalactosidase:Delta G(T) = -262.8 *(1-(T+273.15)/ 342.9 )+ 5.89 *( 69.7 -T)+ 5.89 *(T+273.15)*log((T+273.15)/ 342.9 )
GCA_001428075.betaGalactosidase:Delta G(T) = -226.5 *(1-(T+273.15)/ 343.55 )+ 5.24 *( 70.4 -T)+ 5.24 *(T+273.15)*log((T+273.15)/ 343.55 )
GCA_001428325.betaGalactosidase:Delta G(T) = -248 *(1-(T+273.15)/ 338.43 )+ 4.91 *( 65.3 -T)+ 4.91 *(T+273.15)*log((T+273.15)/ 338.43 )
GCA_001428335.betaGalactosidase:Delta G(T) = -228.3 *(1-(T+273.15)/ 340.45 )+ 5.02 *( 67.3 -T)+ 5.02 *(T+273.15)*log((T+273.15)/ 340.45 )
GCA_001428435.betaGalactosidase:Delta G(T) = -174.5 *(1-(T+273.15)/ 344.26 )+ 4.56 *( 71.1 -T)+ 4.56 *(T+273.15)*log((T+273.15)/ 344.26 )
GCA_001445575.betaGalactosidase:Delta G(T) = -175.2 *(1-(T+273.15)/ 335.7 )+ 2.13 *( 62.6 -T)+ 2.13 *(T+273.15)*log((T+273.15)/ 335.7 )
GCA_001457025.betaGalactosidase:Delta G(T) = -273.2 *(1-(T+273.15)/ 342.71 )+ 5.87 *( 69.6 -T)+ 5.87 *(T+273.15)*log((T+273.15)/ 342.71 )
GCA_001512285.betaGalactosidase:Delta G(T) = -229.7 *(1-(T+273.15)/ 338.22 )+ 4.64 *( 65.1 -T)+ 4.64 *(T+273.15)*log((T+273.15)/ 338.22 )
GCA_001542565.betaGalactosidase:Delta G(T) = -229.3 *(1-(T+273.15)/ 329.94 )+ 5.04 *( 56.8 -T)+ 5.04 *(T+273.15)*log((T+273.15)/ 329.94 )
GCA_001552075.betaGalactosidase:Delta G(T) = -256.8 *(1-(T+273.15)/ 339.96 )+ 3.87 *( 66.8 -T)+ 3.87 *(T+273.15)*log((T+273.15)/ 339.96 )
GCA_001641125.betaGalactosidase:Delta G(T) = -212.2 *(1-(T+273.15)/ 341.45 )+ 4.35 *( 68.3 -T)+ 4.35 *(T+273.15)*log((T+273.15)/ 341.45 )
GCA_001663775.betaGalactosidase:Delta G(T) = -159.9 *(1-(T+273.15)/ 322.92 )+ 6.08 *( 49.8 -T)+ 6.08 *(T+273.15)*log((T+273.15)/ 322.92 )
GCA_001766675.betaGalactosidase:Delta G(T) = -220.6 *(1-(T+273.15)/ 329.17 )+ 4.65 *( 56 -T)+ 4.65 *(T+273.15)*log((T+273.15)/ 329.17 )
GCA_001854365.betaGalactosidase:Delta G(T) = -237.8 *(1-(T+273.15)/ 331.32 )+ 5.37 *( 58.2 -T)+ 5.37 *(T+273.15)*log((T+273.15)/ 331.32 )
GCA_001969265.betaGalactosidase:Delta G(T) = -213 *(1-(T+273.15)/ 337.7 )+ 4.16 *( 64.6 -T)+ 4.16 *(T+273.15)*log((T+273.15)/ 337.7 )
GCA_002157505.betaGalactosidase:Delta G(T) = -200.4 *(1-(T+273.15)/ 340.58 )+ 4.23 *( 67.4 -T)+ 4.23 *(T+273.15)*log((T+273.15)/ 340.58 )
GCA_002157565.betaGalactosidase:Delta G(T) = -213.3 *(1-(T+273.15)/ 347.11 )+ 5.25 *( 74 -T)+ 5.25 *(T+273.15)*log((T+273.15)/ 347.11 )
GCA_002224285.betaGalactosidase:Delta G(T) = -217.1 *(1-(T+273.15)/ 342.52 )+ 5.02 *( 69.4 -T)+ 5.02 *(T+273.15)*log((T+273.15)/ 342.52 )
GCA_002892795.betaGalactosidase:Delta G(T) = -231.6 *(1-(T+273.15)/ 341.11 )+ 4.31 *( 68 -T)+ 4.31 *(T+273.15)*log((T+273.15)/ 341.11 )
GCA_002892835.betaGalactosidase:Delta G(T) = -205.8 *(1-(T+273.15)/ 341 )+ 3.93 *( 67.9 -T)+ 3.93 *(T+273.15)*log((T+273.15)/ 341 )
GCA_002909415.betaGalactosidase:Delta G(T) = -186.8 *(1-(T+273.15)/ 341.75 )+ 4.13 *( 68.6 -T)+ 4.13 *(T+273.15)*log((T+273.15)/ 341.75 )
GCA_002929215.betaGalactosidase:Delta G(T) = -239 *(1-(T+273.15)/ 338.79 )+ 5.46 *( 65.6 -T)+ 5.46 *(T+273.15)*log((T+273.15)/ 338.79 )
GCA_002929255.betaGalactosidase:Delta G(T) = -208 *(1-(T+273.15)/ 343.32 )+ 3.74 *( 70.2 -T)+ 3.74 *(T+273.15)*log((T+273.15)/ 343.32 )
GCA_002929275.betaGalactosidase:Delta G(T) = -208 *(1-(T+273.15)/ 343.32 )+ 3.74 *( 70.2 -T)+ 3.74 *(T+273.15)*log((T+273.15)/ 343.32 )
GCA_002929295.betaGalactosidase:Delta G(T) = -206.8 *(1-(T+273.15)/ 339.33 )+ 4.19 *( 66.2 -T)+ 4.19 *(T+273.15)*log((T+273.15)/ 339.33 )
GCA_002929305.betaGalactosidase:Delta G(T) = -222.8 *(1-(T+273.15)/ 344.39 )+ 5.74 *( 71.2 -T)+ 5.74 *(T+273.15)*log((T+273.15)/ 344.39 )
GCA_002929335.betaGalactosidase:Delta G(T) = -208.1 *(1-(T+273.15)/ 341.02 )+ 5.71 *( 67.9 -T)+ 5.71 *(T+273.15)*log((T+273.15)/ 341.02 )
GCA_002929355.betaGalactosidase:Delta G(T) = -190.6 *(1-(T+273.15)/ 342.84 )+ 5.08 *( 69.7 -T)+ 5.08 *(T+273.15)*log((T+273.15)/ 342.84 )
GCA_002929375.betaGalactosidase:Delta G(T) = -255.9 *(1-(T+273.15)/ 332.29 )+ 3.74 *( 59.1 -T)+ 3.74 *(T+273.15)*log((T+273.15)/ 332.29 )
GCA_002929385.betaGalactosidase:Delta G(T) = -214.7 *(1-(T+273.15)/ 342.81 )+ 3.35 *( 69.7 -T)+ 3.35 *(T+273.15)*log((T+273.15)/ 342.81 )
GCA_002929455.betaGalactosidase:Delta G(T) = -206.5 *(1-(T+273.15)/ 342 )+ 2.96 *( 68.8 -T)+ 2.96 *(T+273.15)*log((T+273.15)/ 342 )
GCA_002929705.betaGalactosidase:Delta G(T) = -226.5 *(1-(T+273.15)/ 339.28 )+ 6.14 *( 66.1 -T)+ 6.14 *(T+273.15)*log((T+273.15)/ 339.28 )
GCA_002929745.betaGalactosidase:Delta G(T) = -185.4 *(1-(T+273.15)/ 341.67 )+ 4.58 *( 68.5 -T)+ 4.58 *(T+273.15)*log((T+273.15)/ 341.67 )
GCA_002929755.betaGalactosidase:Delta G(T) = -233.2 *(1-(T+273.15)/ 335.72 )+ 4.71 *( 62.6 -T)+ 4.71 *(T+273.15)*log((T+273.15)/ 335.72 )
GCA_002934405.betaGalactosidase:Delta G(T) = -246.6 *(1-(T+273.15)/ 337.36 )+ 5.21 *( 64.2 -T)+ 5.21 *(T+273.15)*log((T+273.15)/ 337.36 )
GCA_002953935.betaGalactosidase:Delta G(T) = -214.5 *(1-(T+273.15)/ 337.52 )+ 5.02 *( 64.4 -T)+ 5.02 *(T+273.15)*log((T+273.15)/ 337.52 )
GCA_002954225.betaGalactosidase:Delta G(T) = -186.5 *(1-(T+273.15)/ 343.68 )+ 4.91 *( 70.5 -T)+ 4.91 *(T+273.15)*log((T+273.15)/ 343.68 )
GCA_003116525.betaGalactosidase:Delta G(T) = -241.1 *(1-(T+273.15)/ 336.65 )+ 5.03 *( 63.5 -T)+ 5.03 *(T+273.15)*log((T+273.15)/ 336.65 )
GCA_003185915.betaGalactosidase:Delta G(T) = -265.3 *(1-(T+273.15)/ 339.35 )+ 6.75 *( 66.2 -T)+ 6.75 *(T+273.15)*log((T+273.15)/ 339.35 )
GCA_003208335.betaGalactosidase:Delta G(T) = -202.8 *(1-(T+273.15)/ 342.85 )+ 5.2 *( 69.7 -T)+ 5.2 *(T+273.15)*log((T+273.15)/ 342.85 )
GCA_003219795.betaGalactosidase:Delta G(T) = -175.6 *(1-(T+273.15)/ 345.25 )+ 3.55 *( 72.1 -T)+ 3.55 *(T+273.15)*log((T+273.15)/ 345.25 )
GCA_003219815.betaGalactosidase:Delta G(T) = -237.4 *(1-(T+273.15)/ 338.28 )+ 4.97 *( 65.1 -T)+ 4.97 *(T+273.15)*log((T+273.15)/ 338.28 )
GCA_003268655.betaGalactosidase:Delta G(T) = -247.4 *(1-(T+273.15)/ 336.74 )+ 5.29 *( 63.6 -T)+ 5.29 *(T+273.15)*log((T+273.15)/ 336.74 )
GCA_900016675.betaGalactosidase:Delta G(T) = -225.9 *(1-(T+273.15)/ 332.06 )+ 3 *( 58.9 -T)+ 3 *(T+273.15)*log((T+273.15)/ 332.06 )
GCA_900099735.betaGalactosidase:Delta G(T) = -174.7 *(1-(T+273.15)/ 341.97 )+ 4.2 *( 68.8 -T)+ 4.2 *(T+273.15)*log((T+273.15)/ 341.97 )
GCA_900099975.betaGalactosidase:Delta G(T) = -238.7 *(1-(T+273.15)/ 330.47 )+ 5.62 *( 57.3 -T)+ 5.62 *(T+273.15)*log((T+273.15)/ 330.47 )
GCA_900102805.betaGalactosidase:Delta G(T) = -232.8 *(1-(T+273.15)/ 334.4 )+ 5.04 *( 61.3 -T)+ 5.04 *(T+273.15)*log((T+273.15)/ 334.4 )
GCA_900105345.betaGalactosidase:Delta G(T) = -259.2 *(1-(T+273.15)/ 336.51 )+ 4.41 *( 63.4 -T)+ 4.41 *(T+273.15)*log((T+273.15)/ 336.51 )
GCA_900105535.betaGalactosidase:Delta G(T) = -252.9 *(1-(T+273.15)/ 338.89 )+ 5.48 *( 65.7 -T)+ 5.48 *(T+273.15)*log((T+273.15)/ 338.89 )
GCA_900105965.betaGalactosidase:Delta G(T) = -165.4 *(1-(T+273.15)/ 340.42 )+ 3.65 *( 67.3 -T)+ 3.65 *(T+273.15)*log((T+273.15)/ 340.42 )
GCA_900106835.betaGalactosidase:Delta G(T) = -250.1 *(1-(T+273.15)/ 341.15 )+ 5.2 *( 68 -T)+ 5.2 *(T+273.15)*log((T+273.15)/ 341.15 )
GCA_900110595.betaGalactosidase:Delta G(T) = -251.7 *(1-(T+273.15)/ 333.17 )+ 3.95 *( 60 -T)+ 3.95 *(T+273.15)*log((T+273.15)/ 333.17 )
GCA_900168225.betaGalactosidase:Delta G(T) = -167.6 *(1-(T+273.15)/ 344.99 )+ 4.33 *( 71.8 -T)+ 4.33 *(T+273.15)*log((T+273.15)/ 344.99 )
GCA_000014925.faa_COX3.pdbA:Delta G(T) = -82.7 *(1-(T+273.15)/ 339.88 )+ 1.45 *( 66.7 -T)+ 1.45 *(T+273.15)*log((T+273.15)/ 339.88 )
GCA_000022025.faa_COX3.pdbA:Delta G(T) = -77.4 *(1-(T+273.15)/ 340.65 )+ 1.45 *( 67.5 -T)+ 1.45 *(T+273.15)*log((T+273.15)/ 340.65 )
GCA_000189535.faa_COX3.pdbA:Delta G(T) = -85.2 *(1-(T+273.15)/ 341.32 )+ 1.63 *( 68.2 -T)+ 1.63 *(T+273.15)*log((T+273.15)/ 341.32 )
GCA_000196235.faa_COX3.pdbA:Delta G(T) = -87.7 *(1-(T+273.15)/ 339.3 )+ 1.81 *( 66.2 -T)+ 1.81 *(T+273.15)*log((T+273.15)/ 339.3 )
GCA_000238915.faa_COX3.pdbA:Delta G(T) = -83.5 *(1-(T+273.15)/ 340.84 )+ 1.67 *( 67.7 -T)+ 1.67 *(T+273.15)*log((T+273.15)/ 340.84 )
GCA_000281065.faa_COX3.pdbA:Delta G(T) = -82.3 *(1-(T+273.15)/ 340.52 )+ 1.28 *( 67.4 -T)+ 1.28 *(T+273.15)*log((T+273.15)/ 340.52 )
GCA_000294595.faa_COX3.pdbA:Delta G(T) = -74.4 *(1-(T+273.15)/ 346.02 )+ 1.02 *( 72.9 -T)+ 1.02 *(T+273.15)*log((T+273.15)/ 346.02 )
GCA_000294695.faa_COX3.pdbA:Delta G(T) = -85.6 *(1-(T+273.15)/ 340.04 )+ 1.43 *( 66.9 -T)+ 1.43 *(T+273.15)*log((T+273.15)/ 340.04 )
GCA_000332815.faa_COX3.pdbA:Delta G(T) = -84.7 *(1-(T+273.15)/ 340.7 )+ 1.2 *( 67.6 -T)+ 1.2 *(T+273.15)*log((T+273.15)/ 340.7 )
GCA_000374865.faa_COX3.pdbA:Delta G(T) = -80.8 *(1-(T+273.15)/ 341.39 )+ 1.61 *( 68.2 -T)+ 1.61 *(T+273.15)*log((T+273.15)/ 341.39 )
GCA_000374905.faa_COX3.pdbA:Delta G(T) = -79.5 *(1-(T+273.15)/ 341 )+ 1.47 *( 67.9 -T)+ 1.47 *(T+273.15)*log((T+273.15)/ 341 )
GCA_000374925.faa_COX3.pdbA:Delta G(T) = -81.8 *(1-(T+273.15)/ 340.52 )+ 1.55 *( 67.4 -T)+ 1.55 *(T+273.15)*log((T+273.15)/ 340.52 )
GCA_000374945.faa_COX3.pdbA:Delta G(T) = -85.9 *(1-(T+273.15)/ 338.88 )+ 1.57 *( 65.7 -T)+ 1.57 *(T+273.15)*log((T+273.15)/ 338.88 )
GCA_000468215.faa_COX3.pdbA:Delta G(T) = -74.4 *(1-(T+273.15)/ 346.02 )+ 1.02 *( 72.9 -T)+ 1.02 *(T+273.15)*log((T+273.15)/ 346.02 )
GCA_000482545.faa_COX3.pdbA:Delta G(T) = -86.3 *(1-(T+273.15)/ 340.65 )+ 1.22 *( 67.5 -T)+ 1.22 *(T+273.15)*log((T+273.15)/ 340.65 )
GCA_000514015.faa_COX3.pdbA:Delta G(T) = -81.7 *(1-(T+273.15)/ 341.32 )+ 1.18 *( 68.2 -T)+ 1.18 *(T+273.15)*log((T+273.15)/ 341.32 )
GCA_000514155.faa_COX3.pdbA:Delta G(T) = -81.7 *(1-(T+273.15)/ 341.32 )+ 1.18 *( 68.2 -T)+ 1.18 *(T+273.15)*log((T+273.15)/ 341.32 )
GCA_000517125.faa_COX3.pdbA:Delta G(T) = -74 *(1-(T+273.15)/ 341.38 )+ 1.49 *( 68.2 -T)+ 1.49 *(T+273.15)*log((T+273.15)/ 341.38 )
GCA_000520555.faa_COX3.pdbA:Delta G(T) = -90.3 *(1-(T+273.15)/ 340.75 )+ 1.33 *( 67.6 -T)+ 1.33 *(T+273.15)*log((T+273.15)/ 340.75 )
GCA_000520575.faa_COX3.pdbA:Delta G(T) = -90.3 *(1-(T+273.15)/ 340.75 )+ 1.33 *( 67.6 -T)+ 1.33 *(T+273.15)*log((T+273.15)/ 340.75 )
GCA_000520595.faa_COX3.pdbA:Delta G(T) = -84.1 *(1-(T+273.15)/ 342.69 )+ 1.56 *( 69.5 -T)+ 1.56 *(T+273.15)*log((T+273.15)/ 342.69 )
GCA_000620385.faa_COX3.pdbA:Delta G(T) = -81.8 *(1-(T+273.15)/ 340.52 )+ 1.55 *( 67.4 -T)+ 1.55 *(T+273.15)*log((T+273.15)/ 340.52 )
GCA_000685965.faa_COX3.pdbA:Delta G(T) = -87.7 *(1-(T+273.15)/ 339.3 )+ 1.81 *( 66.2 -T)+ 1.81 *(T+273.15)*log((T+273.15)/ 339.3 )
GCA_000755585.faa_COX3.pdbA:Delta G(T) = -91.6 *(1-(T+273.15)/ 337.73 )+ 1.73 *( 64.6 -T)+ 1.73 *(T+273.15)*log((T+273.15)/ 337.73 )
GCA_000785535.faa_COX3.pdbA:Delta G(T) = -85.4 *(1-(T+273.15)/ 340.01 )+ 1.26 *( 66.9 -T)+ 1.26 *(T+273.15)*log((T+273.15)/ 340.01 )
GCA_000813845.faa_COX3.pdbA:Delta G(T) = -79.8 *(1-(T+273.15)/ 341.23 )+ 1.45 *( 68.1 -T)+ 1.45 *(T+273.15)*log((T+273.15)/ 341.23 )
GCA_000816565.faa_COX3.pdbA:Delta G(T) = -88.2 *(1-(T+273.15)/ 341.08 )+ 1.41 *( 67.9 -T)+ 1.41 *(T+273.15)*log((T+273.15)/ 341.08 )
GCA_000876655.faa_COX3.pdbA:Delta G(T) = -87.7 *(1-(T+273.15)/ 339.3 )+ 1.81 *( 66.2 -T)+ 1.81 *(T+273.15)*log((T+273.15)/ 339.3 )
GCA_000962805.faa_COX3.pdbA:Delta G(T) = -77.4 *(1-(T+273.15)/ 340.65 )+ 1.45 *( 67.5 -T)+ 1.45 *(T+273.15)*log((T+273.15)/ 340.65 )
GCA_001046895.faa_COX3.pdbA:Delta G(T) = -84.4 *(1-(T+273.15)/ 340.37 )+ 1.78 *( 67.2 -T)+ 1.78 *(T+273.15)*log((T+273.15)/ 340.37 )
GCA_001187915.faa_COX3.pdbA:Delta G(T) = -89.7 *(1-(T+273.15)/ 342.94 )+ 1.43 *( 69.8 -T)+ 1.43 *(T+273.15)*log((T+273.15)/ 342.94 )
GCA_001238605.faa_COX3.pdbA:Delta G(T) = -80.5 *(1-(T+273.15)/ 343.84 )+ 1.42 *( 70.7 -T)+ 1.42 *(T+273.15)*log((T+273.15)/ 343.84 )
GCA_001281315.faa_COX3.pdbA:Delta G(T) = -83.9 *(1-(T+273.15)/ 341.73 )+ 1.27 *( 68.6 -T)+ 1.27 *(T+273.15)*log((T+273.15)/ 341.73 )
GCA_001294625.faa_COX3.pdbA:Delta G(T) = -83.6 *(1-(T+273.15)/ 340.2 )+ 1.31 *( 67 -T)+ 1.31 *(T+273.15)*log((T+273.15)/ 340.2 )
GCA_001307035.faa_COX3.pdbA:Delta G(T) = -91.1 *(1-(T+273.15)/ 341 )+ 1.37 *( 67.8 -T)+ 1.37 *(T+273.15)*log((T+273.15)/ 341 )
GCA_001373495.faa_COX3.pdbA:Delta G(T) = -90.1 *(1-(T+273.15)/ 341.93 )+ 1.38 *( 68.8 -T)+ 1.38 *(T+273.15)*log((T+273.15)/ 341.93 )
GCA_001422645.faa_COX3.pdbA:Delta G(T) = -85.9 *(1-(T+273.15)/ 340.63 )+ 1.65 *( 67.5 -T)+ 1.65 *(T+273.15)*log((T+273.15)/ 340.63 )
GCA_001422665.faa_COX3.pdbA:Delta G(T) = -90.1 *(1-(T+273.15)/ 342.66 )+ 1.54 *( 69.5 -T)+ 1.54 *(T+273.15)*log((T+273.15)/ 342.66 )
GCA_001423525.faa_COX3.pdbA:Delta G(T) = -80.5 *(1-(T+273.15)/ 341.01 )+ 1.36 *( 67.9 -T)+ 1.36 *(T+273.15)*log((T+273.15)/ 341.01 )
GCA_001423745.faa_COX3.pdbA:Delta G(T) = -87.7 *(1-(T+273.15)/ 339.3 )+ 1.81 *( 66.2 -T)+ 1.81 *(T+273.15)*log((T+273.15)/ 339.3 )
GCA_001424565.faa_COX3.pdbA:Delta G(T) = -85.1 *(1-(T+273.15)/ 342.36 )+ 1.6 *( 69.2 -T)+ 1.6 *(T+273.15)*log((T+273.15)/ 342.36 )
GCA_001428005.faa_COX3.pdbA:Delta G(T) = -82.6 *(1-(T+273.15)/ 342.39 )+ 1.56 *( 69.2 -T)+ 1.56 *(T+273.15)*log((T+273.15)/ 342.39 )
GCA_001428075.faa_COX3.pdbA:Delta G(T) = -80.1 *(1-(T+273.15)/ 340.34 )+ 1.52 *( 67.2 -T)+ 1.52 *(T+273.15)*log((T+273.15)/ 340.34 )
GCA_001428325.faa_COX3.pdbA:Delta G(T) = -79.5 *(1-(T+273.15)/ 341 )+ 1.47 *( 67.9 -T)+ 1.47 *(T+273.15)*log((T+273.15)/ 341 )
GCA_001428335.faa_COX3.pdbA:Delta G(T) = -80.8 *(1-(T+273.15)/ 342.24 )+ 1.68 *( 69.1 -T)+ 1.68 *(T+273.15)*log((T+273.15)/ 342.24 )
GCA_001428365.faa_COX3.pdbA:Delta G(T) = -83.7 *(1-(T+273.15)/ 338.88 )+ 1.73 *( 65.7 -T)+ 1.73 *(T+273.15)*log((T+273.15)/ 338.88 )
GCA_001428435.faa_COX3.pdbA:Delta G(T) = -89.4 *(1-(T+273.15)/ 343.95 )+ 1.39 *( 70.8 -T)+ 1.39 *(T+273.15)*log((T+273.15)/ 343.95 )
GCA_001445575.faa_COX3.pdbA:Delta G(T) = -86.1 *(1-(T+273.15)/ 339.46 )+ 1.27 *( 66.3 -T)+ 1.27 *(T+273.15)*log((T+273.15)/ 339.46 )
GCA_001457025.faa_COX3.pdbA:Delta G(T) = -82.8 *(1-(T+273.15)/ 341.42 )+ 1.17 *( 68.3 -T)+ 1.17 *(T+273.15)*log((T+273.15)/ 341.42 )
GCA_001512285.faa_COX3.pdbA:Delta G(T) = -85.6 *(1-(T+273.15)/ 340.04 )+ 1.43 *( 66.9 -T)+ 1.43 *(T+273.15)*log((T+273.15)/ 340.04 )
GCA_001512305.faa_COX3.pdbA:Delta G(T) = -81.7 *(1-(T+273.15)/ 339.87 )+ 1.79 *( 66.7 -T)+ 1.79 *(T+273.15)*log((T+273.15)/ 339.87 )
GCA_001542565.faa_COX3.pdbA:Delta G(T) = -86.5 *(1-(T+273.15)/ 339.43 )+ 1.43 *( 66.3 -T)+ 1.43 *(T+273.15)*log((T+273.15)/ 339.43 )
GCA_001552075.faa_COX3.pdbA:Delta G(T) = -90.9 *(1-(T+273.15)/ 339.93 )+ 1.38 *( 66.8 -T)+ 1.38 *(T+273.15)*log((T+273.15)/ 339.93 )
GCA_001641125.faa_COX3.pdbA:Delta G(T) = -81.1 *(1-(T+273.15)/ 340.71 )+ 1.51 *( 67.6 -T)+ 1.51 *(T+273.15)*log((T+273.15)/ 340.71 )
GCA_001663775.faa_COX3.pdbA:Delta G(T) = -83.1 *(1-(T+273.15)/ 340.51 )+ 1.61 *( 67.4 -T)+ 1.61 *(T+273.15)*log((T+273.15)/ 340.51 )
GCA_001766675.faa_COX3.pdbA:Delta G(T) = -83.7 *(1-(T+273.15)/ 340.21 )+ 1.48 *( 67.1 -T)+ 1.48 *(T+273.15)*log((T+273.15)/ 340.21 )
GCA_001854365.faa_COX3.pdbA:Delta G(T) = -86.5 *(1-(T+273.15)/ 339.43 )+ 1.43 *( 66.3 -T)+ 1.43 *(T+273.15)*log((T+273.15)/ 339.43 )
GCA_001969265.faa_COX3.pdbA:Delta G(T) = -80.1 *(1-(T+273.15)/ 339.93 )+ 1.49 *( 66.8 -T)+ 1.49 *(T+273.15)*log((T+273.15)/ 339.93 )
GCA_002008315.faa_COX3.pdbA:Delta G(T) = -83.2 *(1-(T+273.15)/ 341.11 )+ 1.48 *( 68 -T)+ 1.48 *(T+273.15)*log((T+273.15)/ 341.11 )
GCA_002157505.faa_COX3.pdbA:Delta G(T) = -84.2 *(1-(T+273.15)/ 341.02 )+ 0.97 *( 67.9 -T)+ 0.97 *(T+273.15)*log((T+273.15)/ 341.02 )
GCA_002157565.faa_COX3.pdbA:Delta G(T) = -79.8 *(1-(T+273.15)/ 342.49 )+ 1.35 *( 69.3 -T)+ 1.35 *(T+273.15)*log((T+273.15)/ 342.49 )
GCA_002224285.faa_COX3.pdbA:Delta G(T) = -83.3 *(1-(T+273.15)/ 343.14 )+ 1.27 *( 70 -T)+ 1.27 *(T+273.15)*log((T+273.15)/ 343.14 )
GCA_002849715.faa_COX3.pdbA:Delta G(T) = -83.2 *(1-(T+273.15)/ 342.55 )+ 1.34 *( 69.4 -T)+ 1.34 *(T+273.15)*log((T+273.15)/ 342.55 )
GCA_002892795.faa_COX3.pdbA:Delta G(T) = -82.4 *(1-(T+273.15)/ 340.8 )+ 1.66 *( 67.6 -T)+ 1.66 *(T+273.15)*log((T+273.15)/ 340.8 )
GCA_002892835.faa_COX3.pdbA:Delta G(T) = -82.2 *(1-(T+273.15)/ 341.74 )+ 1.59 *( 68.6 -T)+ 1.59 *(T+273.15)*log((T+273.15)/ 341.74 )
GCA_002909415.faa_COX3.pdbA:Delta G(T) = -83.1 *(1-(T+273.15)/ 338.32 )+ 0.99 *( 65.2 -T)+ 0.99 *(T+273.15)*log((T+273.15)/ 338.32 )
GCA_002929215.faa_COX3.pdbA:Delta G(T) = -84.6 *(1-(T+273.15)/ 339.46 )+ 1.61 *( 66.3 -T)+ 1.61 *(T+273.15)*log((T+273.15)/ 339.46 )
GCA_002929255.faa_COX3.pdbA:Delta G(T) = -90.1 *(1-(T+273.15)/ 338.09 )+ 1.61 *( 64.9 -T)+ 1.61 *(T+273.15)*log((T+273.15)/ 338.09 )
GCA_002929275.faa_COX3.pdbA:Delta G(T) = -90.1 *(1-(T+273.15)/ 338.09 )+ 1.61 *( 64.9 -T)+ 1.61 *(T+273.15)*log((T+273.15)/ 338.09 )
GCA_002929295.faa_COX3.pdbA:Delta G(T) = -82.6 *(1-(T+273.15)/ 341.93 )+ 1.05 *( 68.8 -T)+ 1.05 *(T+273.15)*log((T+273.15)/ 341.93 )
GCA_002929305.faa_COX3.pdbA:Delta G(T) = -86.5 *(1-(T+273.15)/ 339.52 )+ 1.06 *( 66.4 -T)+ 1.06 *(T+273.15)*log((T+273.15)/ 339.52 )
GCA_002929335.faa_COX3.pdbA:Delta G(T) = -87.7 *(1-(T+273.15)/ 339.3 )+ 1.81 *( 66.2 -T)+ 1.81 *(T+273.15)*log((T+273.15)/ 339.3 )
GCA_002929355.faa_COX3.pdbA:Delta G(T) = -88.2 *(1-(T+273.15)/ 341.71 )+ 1.32 *( 68.6 -T)+ 1.32 *(T+273.15)*log((T+273.15)/ 341.71 )
GCA_002929375.faa_COX3.pdbA:Delta G(T) = -88.6 *(1-(T+273.15)/ 342.03 )+ 1.28 *( 68.9 -T)+ 1.28 *(T+273.15)*log((T+273.15)/ 342.03 )
GCA_002929385.faa_COX3.pdbA:Delta G(T) = -83 *(1-(T+273.15)/ 339.98 )+ 1.2 *( 66.8 -T)+ 1.2 *(T+273.15)*log((T+273.15)/ 339.98 )
GCA_002929455.faa_COX3.pdbA:Delta G(T) = -90.1 *(1-(T+273.15)/ 338.09 )+ 1.61 *( 64.9 -T)+ 1.61 *(T+273.15)*log((T+273.15)/ 338.09 )
GCA_002929705.faa_COX3.pdbA:Delta G(T) = -87.2 *(1-(T+273.15)/ 339.77 )+ 1.37 *( 66.6 -T)+ 1.37 *(T+273.15)*log((T+273.15)/ 339.77 )
GCA_002929745.faa_COX3.pdbA:Delta G(T) = -87.7 *(1-(T+273.15)/ 344.59 )+ 1.4 *( 71.4 -T)+ 1.4 *(T+273.15)*log((T+273.15)/ 344.59 )
GCA_002929755.faa_COX3.pdbA:Delta G(T) = -81.2 *(1-(T+273.15)/ 342.09 )+ 1.69 *( 68.9 -T)+ 1.69 *(T+273.15)*log((T+273.15)/ 342.09 )
GCA_002934405.faa_COX3.pdbA:Delta G(T) = -85.6 *(1-(T+273.15)/ 341.91 )+ 1.58 *( 68.8 -T)+ 1.58 *(T+273.15)*log((T+273.15)/ 341.91 )
GCA_002953935.faa_COX3.pdbA:Delta G(T) = -83.6 *(1-(T+273.15)/ 343.07 )+ 1.4 *( 69.9 -T)+ 1.4 *(T+273.15)*log((T+273.15)/ 343.07 )
GCA_002954225.faa_COX3.pdbA:Delta G(T) = -80.3 *(1-(T+273.15)/ 342.49 )+ 1.1 *( 69.3 -T)+ 1.1 *(T+273.15)*log((T+273.15)/ 342.49 )
GCA_003116525.faa_COX3.pdbA:Delta G(T) = -76.9 *(1-(T+273.15)/ 342.15 )+ 1.24 *( 69 -T)+ 1.24 *(T+273.15)*log((T+273.15)/ 342.15 )
GCA_003185915.faa_COX3.pdbA:Delta G(T) = -83.3 *(1-(T+273.15)/ 342.84 )+ 1.2 *( 69.7 -T)+ 1.2 *(T+273.15)*log((T+273.15)/ 342.84 )
GCA_003208335.faa_COX3.pdbA:Delta G(T) = -79.8 *(1-(T+273.15)/ 341.23 )+ 1.45 *( 68.1 -T)+ 1.45 *(T+273.15)*log((T+273.15)/ 341.23 )
GCA_003219795.faa_COX3.pdbA:Delta G(T) = -85.6 *(1-(T+273.15)/ 339.5 )+ 1.28 *( 66.3 -T)+ 1.28 *(T+273.15)*log((T+273.15)/ 339.5 )
GCA_003219815.faa_COX3.pdbA:Delta G(T) = -91.1 *(1-(T+273.15)/ 340.44 )+ 1.66 *( 67.3 -T)+ 1.66 *(T+273.15)*log((T+273.15)/ 340.44 )
GCA_003268655.faa_COX3.pdbA:Delta G(T) = -95.3 *(1-(T+273.15)/ 339.63 )+ 1.71 *( 66.5 -T)+ 1.71 *(T+273.15)*log((T+273.15)/ 339.63 )
GCA_003287955.faa_COX3.pdbA:Delta G(T) = -80.8 *(1-(T+273.15)/ 342.49 )+ 1.75 *( 69.3 -T)+ 1.75 *(T+273.15)*log((T+273.15)/ 342.49 )
GCA_900016675.faa_COX3.pdbA:Delta G(T) = -88.7 *(1-(T+273.15)/ 341.68 )+ 1.7 *( 68.5 -T)+ 1.7 *(T+273.15)*log((T+273.15)/ 341.68 )
GCA_900099735.faa_COX3.pdbA:Delta G(T) = -87.1 *(1-(T+273.15)/ 340.54 )+ 1.4 *( 67.4 -T)+ 1.4 *(T+273.15)*log((T+273.15)/ 340.54 )
GCA_900099975.faa_COX3.pdbA:Delta G(T) = -83.7 *(1-(T+273.15)/ 340.04 )+ 1.68 *( 66.9 -T)+ 1.68 *(T+273.15)*log((T+273.15)/ 340.04 )
GCA_900102785.faa_COX3.pdbA:Delta G(T) = -86.3 *(1-(T+273.15)/ 341.07 )+ 1.68 *( 67.9 -T)+ 1.68 *(T+273.15)*log((T+273.15)/ 341.07 )
GCA_900102805.faa_COX3.pdbA:Delta G(T) = -81.7 *(1-(T+273.15)/ 341.32 )+ 1.18 *( 68.2 -T)+ 1.18 *(T+273.15)*log((T+273.15)/ 341.32 )
GCA_900102895.faa_COX3.pdbA:Delta G(T) = -77.3 *(1-(T+273.15)/ 340.95 )+ 1.31 *( 67.8 -T)+ 1.31 *(T+273.15)*log((T+273.15)/ 340.95 )
GCA_900104405.faa_COX3.pdbA:Delta G(T) = -81.8 *(1-(T+273.15)/ 341.5 )+ 1.69 *( 68.3 -T)+ 1.69 *(T+273.15)*log((T+273.15)/ 341.5 )
GCA_900105345.faa_COX3.pdbA:Delta G(T) = -82 *(1-(T+273.15)/ 339.18 )+ 1.1 *( 66 -T)+ 1.1 *(T+273.15)*log((T+273.15)/ 339.18 )
GCA_900105535.faa_COX3.pdbA:Delta G(T) = -80.5 *(1-(T+273.15)/ 341.01 )+ 1.36 *( 67.9 -T)+ 1.36 *(T+273.15)*log((T+273.15)/ 341.01 )
GCA_900105965.faa_COX3.pdbA:Delta G(T) = -84.3 *(1-(T+273.15)/ 340.71 )+ 1.11 *( 67.6 -T)+ 1.11 *(T+273.15)*log((T+273.15)/ 340.71 )
GCA_900106835.faa_COX3.pdbA:Delta G(T) = -85.4 *(1-(T+273.15)/ 340.17 )+ 1.48 *( 67 -T)+ 1.48 *(T+273.15)*log((T+273.15)/ 340.17 )
GCA_900110595.faa_COX3.pdbA:Delta G(T) = -86.6 *(1-(T+273.15)/ 341.01 )+ 1.79 *( 67.9 -T)+ 1.79 *(T+273.15)*log((T+273.15)/ 341.01 )
GCA_900116495.faa_COX3.pdbA:Delta G(T) = -81.8 *(1-(T+273.15)/ 341.22 )+ 1.71 *( 68.1 -T)+ 1.71 *(T+273.15)*log((T+273.15)/ 341.22 )
GCA_900168135.faa_COX3.pdbA:Delta G(T) = -82.1 *(1-(T+273.15)/ 340.35 )+ 1.6 *( 67.2 -T)+ 1.6 *(T+273.15)*log((T+273.15)/ 340.35 )
GCA_900168225.faa_COX3.pdbA:Delta G(T) = -85.9 *(1-(T+273.15)/ 338.88 )+ 1.57 *( 65.7 -T)+ 1.57 *(T+273.15)*log((T+273.15)/ 338.88 )
GCA_000014925.EFG:Delta G(T) = -189.4 *(1-(T+273.15)/ 343.24 )+ 5.02 *( 70.1 -T)+ 5.02 *(T+273.15)*log((T+273.15)/ 343.24 )
GCA_000022025.EFG:Delta G(T) = -202.7 *(1-(T+273.15)/ 343.46 )+ 5.36 *( 70.3 -T)+ 5.36 *(T+273.15)*log((T+273.15)/ 343.46 )
GCA_000189535.EFG:Delta G(T) = -185.5 *(1-(T+273.15)/ 335.15 )+ 5.13 *( 62 -T)+ 5.13 *(T+273.15)*log((T+273.15)/ 335.15 )
GCA_000196235.EFG:Delta G(T) = -131.6 *(1-(T+273.15)/ 339.78 )+ 3.68 *( 66.6 -T)+ 3.68 *(T+273.15)*log((T+273.15)/ 339.78 )
GCA_000238915.EFG:Delta G(T) = -204.4 *(1-(T+273.15)/ 344.61 )+ 5.31 *( 71.5 -T)+ 5.31 *(T+273.15)*log((T+273.15)/ 344.61 )
GCA_000281065.EFG:Delta G(T) = -189.4 *(1-(T+273.15)/ 343.24 )+ 5.02 *( 70.1 -T)+ 5.02 *(T+273.15)*log((T+273.15)/ 343.24 )
GCA_000294595.EFG:Delta G(T) = -197.7 *(1-(T+273.15)/ 344.29 )+ 5.16 *( 71.1 -T)+ 5.16 *(T+273.15)*log((T+273.15)/ 344.29 )
GCA_000294695.EFG:Delta G(T) = -189.4 *(1-(T+273.15)/ 343.24 )+ 5.02 *( 70.1 -T)+ 5.02 *(T+273.15)*log((T+273.15)/ 343.24 )
GCA_000332815.EFG:Delta G(T) = -178.4 *(1-(T+273.15)/ 337.69 )+ 4.94 *( 64.5 -T)+ 4.94 *(T+273.15)*log((T+273.15)/ 337.69 )
GCA_000374865.EFG:Delta G(T) = -184.5 *(1-(T+273.15)/ 345.01 )+ 4.76 *( 71.9 -T)+ 4.76 *(T+273.15)*log((T+273.15)/ 345.01 )
GCA_000374905.EFG:Delta G(T) = -194 *(1-(T+273.15)/ 344.44 )+ 5.05 *( 71.3 -T)+ 5.05 *(T+273.15)*log((T+273.15)/ 344.44 )
GCA_000374925.EFG:Delta G(T) = -125.6 *(1-(T+273.15)/ 343.53 )+ 3.32 *( 70.4 -T)+ 3.32 *(T+273.15)*log((T+273.15)/ 343.53 )
GCA_000374945.EFG:Delta G(T) = -186.7 *(1-(T+273.15)/ 342.85 )+ 4.98 *( 69.7 -T)+ 4.98 *(T+273.15)*log((T+273.15)/ 342.85 )
GCA_000468215.EFG:Delta G(T) = -197.7 *(1-(T+273.15)/ 344.29 )+ 5.16 *( 71.1 -T)+ 5.16 *(T+273.15)*log((T+273.15)/ 344.29 )
GCA_000482545.EFG:Delta G(T) = -185 *(1-(T+273.15)/ 343.51 )+ 4.88 *( 70.4 -T)+ 4.88 *(T+273.15)*log((T+273.15)/ 343.51 )
GCA_000514015.EFG:Delta G(T) = -127.8 *(1-(T+273.15)/ 336.7 )+ 3.76 *( 63.5 -T)+ 3.76 *(T+273.15)*log((T+273.15)/ 336.7 )
GCA_000514155.EFG:Delta G(T) = -127.8 *(1-(T+273.15)/ 336.7 )+ 3.76 *( 63.5 -T)+ 3.76 *(T+273.15)*log((T+273.15)/ 336.7 )
GCA_000517125.EFG:Delta G(T) = -190.4 *(1-(T+273.15)/ 340.54 )+ 5.26 *( 67.4 -T)+ 5.26 *(T+273.15)*log((T+273.15)/ 340.54 )
GCA_000520555.EFG:Delta G(T) = -212.6 *(1-(T+273.15)/ 339.66 )+ 4.91 *( 66.5 -T)+ 4.91 *(T+273.15)*log((T+273.15)/ 339.66 )
GCA_000520575.EFG:Delta G(T) = -212.6 *(1-(T+273.15)/ 339.66 )+ 4.91 *( 66.5 -T)+ 4.91 *(T+273.15)*log((T+273.15)/ 339.66 )
GCA_000520595.EFG:Delta G(T) = -137.8 *(1-(T+273.15)/ 342.53 )+ 3.69 *( 69.4 -T)+ 3.69 *(T+273.15)*log((T+273.15)/ 342.53 )
GCA_000620385.EFG:Delta G(T) = -189.1 *(1-(T+273.15)/ 345.69 )+ 4.84 *( 72.5 -T)+ 4.84 *(T+273.15)*log((T+273.15)/ 345.69 )
GCA_000685965.EFG:Delta G(T) = -118.1 *(1-(T+273.15)/ 338.19 )+ 3.39 *( 65 -T)+ 3.39 *(T+273.15)*log((T+273.15)/ 338.19 )
GCA_000755585.EFG:Delta G(T) = -190.8 *(1-(T+273.15)/ 341.94 )+ 4.9 *( 68.8 -T)+ 4.9 *(T+273.15)*log((T+273.15)/ 341.94 )
GCA_000785535.EFG:Delta G(T) = -189.7 *(1-(T+273.15)/ 340 )+ 4.8 *( 66.8 -T)+ 4.8 *(T+273.15)*log((T+273.15)/ 340 )
GCA_000813845.EFG:Delta G(T) = -197.3 *(1-(T+273.15)/ 344.38 )+ 5.14 *( 71.2 -T)+ 5.14 *(T+273.15)*log((T+273.15)/ 344.38 )
GCA_000816565.EFG:Delta G(T) = -138.3 *(1-(T+273.15)/ 340.99 )+ 3.8 *( 67.8 -T)+ 3.8 *(T+273.15)*log((T+273.15)/ 340.99 )
GCA_000876655.EFG:Delta G(T) = -183.7 *(1-(T+273.15)/ 341.44 )+ 5.01 *( 68.3 -T)+ 5.01 *(T+273.15)*log((T+273.15)/ 341.44 )
GCA_000962805.EFG:Delta G(T) = -180.2 *(1-(T+273.15)/ 336.79 )+ 5.3 *( 63.6 -T)+ 5.3 *(T+273.15)*log((T+273.15)/ 336.79 )
GCA_001046895.EFG:Delta G(T) = -180.6 *(1-(T+273.15)/ 335.3 )+ 5.1 *( 62.1 -T)+ 5.1 *(T+273.15)*log((T+273.15)/ 335.3 )
GCA_001187915.EFG:Delta G(T) = -188.8 *(1-(T+273.15)/ 342.16 )+ 5.09 *( 69 -T)+ 5.09 *(T+273.15)*log((T+273.15)/ 342.16 )
GCA_001238605.EFG:Delta G(T) = -191.2 *(1-(T+273.15)/ 344.31 )+ 4.99 *( 71.2 -T)+ 4.99 *(T+273.15)*log((T+273.15)/ 344.31 )
GCA_001281315.EFG:Delta G(T) = -126.6 *(1-(T+273.15)/ 333.62 )+ 3.63 *( 60.5 -T)+ 3.63 *(T+273.15)*log((T+273.15)/ 333.62 )
GCA_001294625.EFG:Delta G(T) = -146.9 *(1-(T+273.15)/ 336.95 )+ 4.31 *( 63.8 -T)+ 4.31 *(T+273.15)*log((T+273.15)/ 336.95 )
GCA_001307035.EFG:Delta G(T) = -179.2 *(1-(T+273.15)/ 338.91 )+ 5.08 *( 65.8 -T)+ 5.08 *(T+273.15)*log((T+273.15)/ 338.91 )
GCA_001373495.EFG:Delta G(T) = -184 *(1-(T+273.15)/ 337.09 )+ 5.08 *( 63.9 -T)+ 5.08 *(T+273.15)*log((T+273.15)/ 337.09 )
GCA_001422645.EFG:Delta G(T) = -184 *(1-(T+273.15)/ 341.76 )+ 4.99 *( 68.6 -T)+ 4.99 *(T+273.15)*log((T+273.15)/ 341.76 )
GCA_001422665.EFG:Delta G(T) = -193.1 *(1-(T+273.15)/ 342.44 )+ 4.93 *( 69.3 -T)+ 4.93 *(T+273.15)*log((T+273.15)/ 342.44 )
GCA_001423525.EFG:Delta G(T) = -194.9 *(1-(T+273.15)/ 343.97 )+ 5.11 *( 70.8 -T)+ 5.11 *(T+273.15)*log((T+273.15)/ 343.97 )
GCA_001423745.EFG:Delta G(T) = -132.6 *(1-(T+273.15)/ 340.17 )+ 3.69 *( 67 -T)+ 3.69 *(T+273.15)*log((T+273.15)/ 340.17 )
GCA_001424565.EFG:Delta G(T) = -191.2 *(1-(T+273.15)/ 344.31 )+ 4.99 *( 71.2 -T)+ 4.99 *(T+273.15)*log((T+273.15)/ 344.31 )
GCA_001428005.EFG:Delta G(T) = -185.1 *(1-(T+273.15)/ 342.39 )+ 4.97 *( 69.2 -T)+ 4.97 *(T+273.15)*log((T+273.15)/ 342.39 )
GCA_001428075.EFG:Delta G(T) = -171.2 *(1-(T+273.15)/ 336.89 )+ 4.76 *( 63.7 -T)+ 4.76 *(T+273.15)*log((T+273.15)/ 336.89 )
GCA_001428325.EFG:Delta G(T) = -196.9 *(1-(T+273.15)/ 345.25 )+ 5.07 *( 72.1 -T)+ 5.07 *(T+273.15)*log((T+273.15)/ 345.25 )
GCA_001428335.EFG:Delta G(T) = -133.2 *(1-(T+273.15)/ 334.69 )+ 3.94 *( 61.5 -T)+ 3.94 *(T+273.15)*log((T+273.15)/ 334.69 )
GCA_001428365.EFG:Delta G(T) = -131.9 *(1-(T+273.15)/ 336.28 )+ 3.91 *( 63.1 -T)+ 3.91 *(T+273.15)*log((T+273.15)/ 336.28 )
GCA_001428435.EFG:Delta G(T) = -198.5 *(1-(T+273.15)/ 334.21 )+ 4.53 *( 61.1 -T)+ 4.53 *(T+273.15)*log((T+273.15)/ 334.21 )
GCA_001445575.EFG:Delta G(T) = -173.8 *(1-(T+273.15)/ 341.75 )+ 4.72 *( 68.6 -T)+ 4.72 *(T+273.15)*log((T+273.15)/ 341.75 )
GCA_001457025.EFG:Delta G(T) = -192.4 *(1-(T+273.15)/ 345.42 )+ 4.94 *( 72.3 -T)+ 4.94 *(T+273.15)*log((T+273.15)/ 345.42 )
GCA_001512285.EFG:Delta G(T) = -183.3 *(1-(T+273.15)/ 344.01 )+ 4.8 *( 70.9 -T)+ 4.8 *(T+273.15)*log((T+273.15)/ 344.01 )
GCA_001512305.EFG:Delta G(T) = -175.8 *(1-(T+273.15)/ 333.67 )+ 5.05 *( 60.5 -T)+ 5.05 *(T+273.15)*log((T+273.15)/ 333.67 )
GCA_001542565.EFG:Delta G(T) = -139.2 *(1-(T+273.15)/ 338.21 )+ 4 *( 65.1 -T)+ 4 *(T+273.15)*log((T+273.15)/ 338.21 )
GCA_001552075.EFG:Delta G(T) = -155.6 *(1-(T+273.15)/ 341.34 )+ 4.25 *( 68.2 -T)+ 4.25 *(T+273.15)*log((T+273.15)/ 341.34 )
GCA_001641125.EFG:Delta G(T) = -172.1 *(1-(T+273.15)/ 344.78 )+ 4.46 *( 71.6 -T)+ 4.46 *(T+273.15)*log((T+273.15)/ 344.78 )
GCA_001663775.EFG:Delta G(T) = -182.5 *(1-(T+273.15)/ 334.73 )+ 4.94 *( 61.6 -T)+ 4.94 *(T+273.15)*log((T+273.15)/ 334.73 )
GCA_001750145.EFG:Delta G(T) = -180.7 *(1-(T+273.15)/ 342.75 )+ 4.83 *( 69.6 -T)+ 4.83 *(T+273.15)*log((T+273.15)/ 342.75 )
GCA_001766675.EFG:Delta G(T) = -127.7 *(1-(T+273.15)/ 340.62 )+ 3.53 *( 67.5 -T)+ 3.53 *(T+273.15)*log((T+273.15)/ 340.62 )
GCA_001854365.EFG:Delta G(T) = -139.2 *(1-(T+273.15)/ 338.21 )+ 4 *( 65.1 -T)+ 4 *(T+273.15)*log((T+273.15)/ 338.21 )
GCA_001969265.EFG:Delta G(T) = -197.6 *(1-(T+273.15)/ 341.89 )+ 5.35 *( 68.7 -T)+ 5.35 *(T+273.15)*log((T+273.15)/ 341.89 )
GCA_002008315.EFG:Delta G(T) = -187.5 *(1-(T+273.15)/ 346.5 )+ 4.74 *( 73.4 -T)+ 4.74 *(T+273.15)*log((T+273.15)/ 346.5 )
GCA_002157505.EFG:Delta G(T) = -180.8 *(1-(T+273.15)/ 342.37 )+ 4.48 *( 69.2 -T)+ 4.48 *(T+273.15)*log((T+273.15)/ 342.37 )
GCA_002157565.EFG:Delta G(T) = -186.6 *(1-(T+273.15)/ 344.65 )+ 4.84 *( 71.5 -T)+ 4.84 *(T+273.15)*log((T+273.15)/ 344.65 )
GCA_002224285.EFG:Delta G(T) = -179.3 *(1-(T+273.15)/ 338.32 )+ 5.14 *( 65.2 -T)+ 5.14 *(T+273.15)*log((T+273.15)/ 338.32 )
GCA_002849715.EFG:Delta G(T) = -146.2 *(1-(T+273.15)/ 338.1 )+ 3.39 *( 64.9 -T)+ 3.39 *(T+273.15)*log((T+273.15)/ 338.1 )
GCA_002892795.EFG:Delta G(T) = -187.5 *(1-(T+273.15)/ 342.5 )+ 5.03 *( 69.4 -T)+ 5.03 *(T+273.15)*log((T+273.15)/ 342.5 )
GCA_002892835.EFG:Delta G(T) = -193.1 *(1-(T+273.15)/ 345.13 )+ 4.98 *( 72 -T)+ 4.98 *(T+273.15)*log((T+273.15)/ 345.13 )
GCA_002909415.EFG:Delta G(T) = -196.2 *(1-(T+273.15)/ 341.17 )+ 4.82 *( 68 -T)+ 4.82 *(T+273.15)*log((T+273.15)/ 341.17 )
GCA_002929215.EFG:Delta G(T) = -112 *(1-(T+273.15)/ 341.68 )+ 3.04 *( 68.5 -T)+ 3.04 *(T+273.15)*log((T+273.15)/ 341.68 )
GCA_002929255.EFG:Delta G(T) = -166 *(1-(T+273.15)/ 339.81 )+ 4.64 *( 66.7 -T)+ 4.64 *(T+273.15)*log((T+273.15)/ 339.81 )
GCA_002929275.EFG:Delta G(T) = -166 *(1-(T+273.15)/ 339.81 )+ 4.64 *( 66.7 -T)+ 4.64 *(T+273.15)*log((T+273.15)/ 339.81 )
GCA_002929295.EFG:Delta G(T) = -192.5 *(1-(T+273.15)/ 344.05 )+ 5.04 *( 70.9 -T)+ 5.04 *(T+273.15)*log((T+273.15)/ 344.05 )
GCA_002929305.EFG:Delta G(T) = -206.9 *(1-(T+273.15)/ 342.16 )+ 5.19 *( 69 -T)+ 5.19 *(T+273.15)*log((T+273.15)/ 342.16 )
GCA_002929335.EFG:Delta G(T) = -183.3 *(1-(T+273.15)/ 346.63 )+ 4.62 *( 73.5 -T)+ 4.62 *(T+273.15)*log((T+273.15)/ 346.63 )
GCA_002929355.EFG:Delta G(T) = -191 *(1-(T+273.15)/ 341.82 )+ 4.8 *( 68.7 -T)+ 4.8 *(T+273.15)*log((T+273.15)/ 341.82 )
GCA_002929375.EFG:Delta G(T) = -130.8 *(1-(T+273.15)/ 342.43 )+ 3.51 *( 69.3 -T)+ 3.51 *(T+273.15)*log((T+273.15)/ 342.43 )
GCA_002929385.EFG:Delta G(T) = -164.1 *(1-(T+273.15)/ 338.48 )+ 4.69 *( 65.3 -T)+ 4.69 *(T+273.15)*log((T+273.15)/ 338.48 )
GCA_002929455.EFG:Delta G(T) = -147.7 *(1-(T+273.15)/ 341.53 )+ 4.02 *( 68.4 -T)+ 4.02 *(T+273.15)*log((T+273.15)/ 341.53 )
GCA_002929705.EFG:Delta G(T) = -179.5 *(1-(T+273.15)/ 342.54 )+ 4.81 *( 69.4 -T)+ 4.81 *(T+273.15)*log((T+273.15)/ 342.54 )
GCA_002929745.EFG:Delta G(T) = -155.5 *(1-(T+273.15)/ 341.34 )+ 4.25 *( 68.2 -T)+ 4.25 *(T+273.15)*log((T+273.15)/ 341.34 )
GCA_002929755.EFG:Delta G(T) = -118.5 *(1-(T+273.15)/ 338.66 )+ 3.38 *( 65.5 -T)+ 3.38 *(T+273.15)*log((T+273.15)/ 338.66 )
GCA_002934405.EFG:Delta G(T) = -129.1 *(1-(T+273.15)/ 338.39 )+ 3.69 *( 65.2 -T)+ 3.69 *(T+273.15)*log((T+273.15)/ 338.39 )
GCA_002953935.EFG:Delta G(T) = -202.6 *(1-(T+273.15)/ 345.24 )+ 5.21 *( 72.1 -T)+ 5.21 *(T+273.15)*log((T+273.15)/ 345.24 )
GCA_002954225.EFG:Delta G(T) = -189.8 *(1-(T+273.15)/ 343.89 )+ 4.99 *( 70.7 -T)+ 4.99 *(T+273.15)*log((T+273.15)/ 343.89 )
GCA_003097355.EFG:Delta G(T) = -124.8 *(1-(T+273.15)/ 339.14 )+ 3.53 *( 66 -T)+ 3.53 *(T+273.15)*log((T+273.15)/ 339.14 )
GCA_003116525.EFG:Delta G(T) = -184.5 *(1-(T+273.15)/ 345.01 )+ 4.76 *( 71.9 -T)+ 4.76 *(T+273.15)*log((T+273.15)/ 345.01 )
GCA_003185915.EFG:Delta G(T) = -143.9 *(1-(T+273.15)/ 338.35 )+ 4.12 *( 65.2 -T)+ 4.12 *(T+273.15)*log((T+273.15)/ 338.35 )
GCA_003208335.EFG:Delta G(T) = -168.6 *(1-(T+273.15)/ 336.35 )+ 4.93 *( 63.2 -T)+ 4.93 *(T+273.15)*log((T+273.15)/ 336.35 )
GCA_003219795.EFG:Delta G(T) = -142.6 *(1-(T+273.15)/ 334.02 )+ 3.94 *( 60.9 -T)+ 3.94 *(T+273.15)*log((T+273.15)/ 334.02 )
GCA_003219815.EFG:Delta G(T) = -200.3 *(1-(T+273.15)/ 342.68 )+ 5.36 *( 69.5 -T)+ 5.36 *(T+273.15)*log((T+273.15)/ 342.68 )
GCA_003268655.EFG:Delta G(T) = -197.7 *(1-(T+273.15)/ 342.04 )+ 5.34 *( 68.9 -T)+ 5.34 *(T+273.15)*log((T+273.15)/ 342.04 )
GCA_003287955.EFG:Delta G(T) = -123.1 *(1-(T+273.15)/ 339.22 )+ 3.48 *( 66.1 -T)+ 3.48 *(T+273.15)*log((T+273.15)/ 339.22 )
GCA_900016675.EFG:Delta G(T) = -167 *(1-(T+273.15)/ 338.16 )+ 4.78 *( 65 -T)+ 4.78 *(T+273.15)*log((T+273.15)/ 338.16 )
GCA_900099735.EFG:Delta G(T) = -193.8 *(1-(T+273.15)/ 336.62 )+ 4.98 *( 63.5 -T)+ 4.98 *(T+273.15)*log((T+273.15)/ 336.62 )
GCA_900099975.EFG:Delta G(T) = -180 *(1-(T+273.15)/ 340.05 )+ 5.02 *( 66.9 -T)+ 5.02 *(T+273.15)*log((T+273.15)/ 340.05 )
GCA_900102785.EFG:Delta G(T) = -126.8 *(1-(T+273.15)/ 342.02 )+ 3.43 *( 68.9 -T)+ 3.43 *(T+273.15)*log((T+273.15)/ 342.02 )
GCA_900102805.EFG:Delta G(T) = -127.8 *(1-(T+273.15)/ 336.7 )+ 3.76 *( 63.5 -T)+ 3.76 *(T+273.15)*log((T+273.15)/ 336.7 )
GCA_900102895.EFG:Delta G(T) = -190.5 *(1-(T+273.15)/ 343.11 )+ 5.06 *( 70 -T)+ 5.06 *(T+273.15)*log((T+273.15)/ 343.11 )
GCA_900104405.EFG:Delta G(T) = -182.6 *(1-(T+273.15)/ 342.31 )+ 4.91 *( 69.2 -T)+ 4.91 *(T+273.15)*log((T+273.15)/ 342.31 )
GCA_900105345.EFG:Delta G(T) = -185.7 *(1-(T+273.15)/ 335.55 )+ 5 *( 62.4 -T)+ 5 *(T+273.15)*log((T+273.15)/ 335.55 )
GCA_900105535.EFG:Delta G(T) = -136.5 *(1-(T+273.15)/ 338.77 )+ 3.88 *( 65.6 -T)+ 3.88 *(T+273.15)*log((T+273.15)/ 338.77 )
GCA_900105965.EFG:Delta G(T) = -190.8 *(1-(T+273.15)/ 341.94 )+ 4.9 *( 68.8 -T)+ 4.9 *(T+273.15)*log((T+273.15)/ 341.94 )
GCA_900106835.EFG:Delta G(T) = -189.4 *(1-(T+273.15)/ 343.24 )+ 5.02 *( 70.1 -T)+ 5.02 *(T+273.15)*log((T+273.15)/ 343.24 )
GCA_900110595.EFG:Delta G(T) = -182.5 *(1-(T+273.15)/ 344.94 )+ 4.72 *( 71.8 -T)+ 4.72 *(T+273.15)*log((T+273.15)/ 344.94 )
GCA_900116495.EFG:Delta G(T) = -193.1 *(1-(T+273.15)/ 334.99 )+ 5.11 *( 61.8 -T)+ 5.11 *(T+273.15)*log((T+273.15)/ 334.99 )
GCA_900168135.EFG:Delta G(T) = -115.9 *(1-(T+273.15)/ 340.53 )+ 3.21 *( 67.4 -T)+ 3.21 *(T+273.15)*log((T+273.15)/ 340.53 )
GCA_900168225.EFG:Delta G(T) = -186.7 *(1-(T+273.15)/ 342.85 )+ 4.98 *( 69.7 -T)+ 4.98 *(T+273.15)*log((T+273.15)/ 342.85 )
GCA_000014925.faa_MRF1.pdbA:Delta G(T) = -95.6 *(1-(T+273.15)/ 329.14 )+ 3.22 *( 56 -T)+ 3.22 *(T+273.15)*log((T+273.15)/ 329.14 )
GCA_000022025.faa_MRF1.pdbA:Delta G(T) = -109.2 *(1-(T+273.15)/ 330.29 )+ 3.6 *( 57.1 -T)+ 3.6 *(T+273.15)*log((T+273.15)/ 330.29 )
GCA_000189535.faa_MRF1.pdbA:Delta G(T) = -110.9 *(1-(T+273.15)/ 329.09 )+ 3.73 *( 55.9 -T)+ 3.73 *(T+273.15)*log((T+273.15)/ 329.09 )
GCA_000196235.faa_MRF1.pdbA:Delta G(T) = -106 *(1-(T+273.15)/ 328.31 )+ 3.62 *( 55.2 -T)+ 3.62 *(T+273.15)*log((T+273.15)/ 328.31 )
GCA_000238915.faa_MRF1.pdbA:Delta G(T) = -110 *(1-(T+273.15)/ 328.12 )+ 3.77 *( 55 -T)+ 3.77 *(T+273.15)*log((T+273.15)/ 328.12 )
GCA_000281065.faa_MRF1.pdbA:Delta G(T) = -95.6 *(1-(T+273.15)/ 329.14 )+ 3.22 *( 56 -T)+ 3.22 *(T+273.15)*log((T+273.15)/ 329.14 )
GCA_000294595.faa_MRF1.pdbA:Delta G(T) = -88.3 *(1-(T+273.15)/ 326.07 )+ 3.15 *( 52.9 -T)+ 3.15 *(T+273.15)*log((T+273.15)/ 326.07 )
GCA_000294695.faa_MRF1.pdbA:Delta G(T) = -95.6 *(1-(T+273.15)/ 329.14 )+ 3.22 *( 56 -T)+ 3.22 *(T+273.15)*log((T+273.15)/ 329.14 )
GCA_000332815.faa_MRF1.pdbA:Delta G(T) = -85.6 *(1-(T+273.15)/ 323.29 )+ 3.23 *( 50.1 -T)+ 3.23 *(T+273.15)*log((T+273.15)/ 323.29 )
GCA_000374865.faa_MRF1.pdbA:Delta G(T) = -112.1 *(1-(T+273.15)/ 329.33 )+ 3.76 *( 56.2 -T)+ 3.76 *(T+273.15)*log((T+273.15)/ 329.33 )
GCA_000374905.faa_MRF1.pdbA:Delta G(T) = -109.5 *(1-(T+273.15)/ 330.28 )+ 3.6 *( 57.1 -T)+ 3.6 *(T+273.15)*log((T+273.15)/ 330.28 )
GCA_000374925.faa_MRF1.pdbA:Delta G(T) = -75.2 *(1-(T+273.15)/ 324.97 )+ 2.74 *( 51.8 -T)+ 2.74 *(T+273.15)*log((T+273.15)/ 324.97 )
GCA_000374945.faa_MRF1.pdbA:Delta G(T) = -95.8 *(1-(T+273.15)/ 329.25 )+ 3.22 *( 56.1 -T)+ 3.22 *(T+273.15)*log((T+273.15)/ 329.25 )
GCA_000468215.faa_MRF1.pdbA:Delta G(T) = -88.7 *(1-(T+273.15)/ 326.66 )+ 3.13 *( 53.5 -T)+ 3.13 *(T+273.15)*log((T+273.15)/ 326.66 )
GCA_000482545.faa_MRF1.pdbA:Delta G(T) = -72.1 *(1-(T+273.15)/ 332.35 )+ 2.29 *( 59.2 -T)+ 2.29 *(T+273.15)*log((T+273.15)/ 332.35 )
GCA_000514015.faa_MRF1.pdbA:Delta G(T) = -95.6 *(1-(T+273.15)/ 329.14 )+ 3.22 *( 56 -T)+ 3.22 *(T+273.15)*log((T+273.15)/ 329.14 )
GCA_000514155.faa_MRF1.pdbA:Delta G(T) = -95.6 *(1-(T+273.15)/ 329.14 )+ 3.22 *( 56 -T)+ 3.22 *(T+273.15)*log((T+273.15)/ 329.14 )
GCA_000517125.faa_MRF1.pdbA:Delta G(T) = -105 *(1-(T+273.15)/ 330.14 )+ 3.47 *( 57 -T)+ 3.47 *(T+273.15)*log((T+273.15)/ 330.14 )
GCA_000520555.faa_MRF1.pdbA:Delta G(T) = -78.3 *(1-(T+273.15)/ 327.91 )+ 2.69 *( 54.8 -T)+ 2.69 *(T+273.15)*log((T+273.15)/ 327.91 )
GCA_000520575.faa_MRF1.pdbA:Delta G(T) = -78.3 *(1-(T+273.15)/ 327.91 )+ 2.69 *( 54.8 -T)+ 2.69 *(T+273.15)*log((T+273.15)/ 327.91 )
GCA_000520595.faa_MRF1.pdbA:Delta G(T) = -64 *(1-(T+273.15)/ 332.55 )+ 2.02 *( 59.4 -T)+ 2.02 *(T+273.15)*log((T+273.15)/ 332.55 )
GCA_000620385.faa_MRF1.pdbA:Delta G(T) = -107.9 *(1-(T+273.15)/ 327.52 )+ 3.74 *( 54.4 -T)+ 3.74 *(T+273.15)*log((T+273.15)/ 327.52 )
GCA_000685965.faa_MRF1.pdbA:Delta G(T) = -71.3 *(1-(T+273.15)/ 324.03 )+ 2.65 *( 50.9 -T)+ 2.65 *(T+273.15)*log((T+273.15)/ 324.03 )
GCA_000755585.faa_MRF1.pdbA:Delta G(T) = -67.3 *(1-(T+273.15)/ 325.74 )+ 2.42 *( 52.6 -T)+ 2.42 *(T+273.15)*log((T+273.15)/ 325.74 )
GCA_000785535.faa_MRF1.pdbA:Delta G(T) = -79.4 *(1-(T+273.15)/ 325.72 )+ 2.85 *( 52.6 -T)+ 2.85 *(T+273.15)*log((T+273.15)/ 325.72 )
GCA_000813845.faa_MRF1.pdbA:Delta G(T) = -109.4 *(1-(T+273.15)/ 329.28 )+ 3.67 *( 56.1 -T)+ 3.67 *(T+273.15)*log((T+273.15)/ 329.28 )
GCA_000816565.faa_MRF1.pdbA:Delta G(T) = -94.2 *(1-(T+273.15)/ 329.64 )+ 3.14 *( 56.5 -T)+ 3.14 *(T+273.15)*log((T+273.15)/ 329.64 )
GCA_000876655.faa_MRF1.pdbA:Delta G(T) = -97.2 *(1-(T+273.15)/ 328.75 )+ 3.29 *( 55.6 -T)+ 3.29 *(T+273.15)*log((T+273.15)/ 328.75 )
GCA_000962805.faa_MRF1.pdbA:Delta G(T) = -107.1 *(1-(T+273.15)/ 330.41 )+ 3.52 *( 57.3 -T)+ 3.52 *(T+273.15)*log((T+273.15)/ 330.41 )
GCA_001046895.faa_MRF1.pdbA:Delta G(T) = -105 *(1-(T+273.15)/ 329.14 )+ 3.53 *( 56 -T)+ 3.53 *(T+273.15)*log((T+273.15)/ 329.14 )
GCA_001187915.faa_MRF1.pdbA:Delta G(T) = -73.8 *(1-(T+273.15)/ 329 )+ 2.49 *( 55.9 -T)+ 2.49 *(T+273.15)*log((T+273.15)/ 329 )
GCA_001238605.faa_MRF1.pdbA:Delta G(T) = -112.7 *(1-(T+273.15)/ 330.75 )+ 3.68 *( 57.6 -T)+ 3.68 *(T+273.15)*log((T+273.15)/ 330.75 )
GCA_001281315.faa_MRF1.pdbA:Delta G(T) = -88.4 *(1-(T+273.15)/ 324.63 )+ 3.25 *( 51.5 -T)+ 3.25 *(T+273.15)*log((T+273.15)/ 324.63 )
GCA_001294625.faa_MRF1.pdbA:Delta G(T) = -111.2 *(1-(T+273.15)/ 330.59 )+ 3.64 *( 57.4 -T)+ 3.64 *(T+273.15)*log((T+273.15)/ 330.59 )
GCA_001307035.faa_MRF1.pdbA:Delta G(T) = -70.2 *(1-(T+273.15)/ 328.49 )+ 2.39 *( 55.3 -T)+ 2.39 *(T+273.15)*log((T+273.15)/ 328.49 )
GCA_001373495.faa_MRF1.pdbA:Delta G(T) = -65.3 *(1-(T+273.15)/ 328.86 )+ 2.21 *( 55.7 -T)+ 2.21 *(T+273.15)*log((T+273.15)/ 328.86 )
GCA_001422645.faa_MRF1.pdbA:Delta G(T) = -72.3 *(1-(T+273.15)/ 325.1 )+ 2.63 *( 51.9 -T)+ 2.63 *(T+273.15)*log((T+273.15)/ 325.1 )
GCA_001422665.faa_MRF1.pdbA:Delta G(T) = -81.1 *(1-(T+273.15)/ 326.96 )+ 2.84 *( 53.8 -T)+ 2.84 *(T+273.15)*log((T+273.15)/ 326.96 )
GCA_001423525.faa_MRF1.pdbA:Delta G(T) = -110 *(1-(T+273.15)/ 330.07 )+ 3.64 *( 56.9 -T)+ 3.64 *(T+273.15)*log((T+273.15)/ 330.07 )
GCA_001423745.faa_MRF1.pdbA:Delta G(T) = -99.2 *(1-(T+273.15)/ 329.07 )+ 3.34 *( 55.9 -T)+ 3.34 *(T+273.15)*log((T+273.15)/ 329.07 )
GCA_001424565.faa_MRF1.pdbA:Delta G(T) = -112.7 *(1-(T+273.15)/ 330.75 )+ 3.68 *( 57.6 -T)+ 3.68 *(T+273.15)*log((T+273.15)/ 330.75 )
GCA_001428005.faa_MRF1.pdbA:Delta G(T) = -110.7 *(1-(T+273.15)/ 330.71 )+ 3.62 *( 57.6 -T)+ 3.62 *(T+273.15)*log((T+273.15)/ 330.71 )
GCA_001428075.faa_MRF1.pdbA:Delta G(T) = -62 *(1-(T+273.15)/ 324.63 )+ 2.28 *( 51.5 -T)+ 2.28 *(T+273.15)*log((T+273.15)/ 324.63 )
GCA_001428325.faa_MRF1.pdbA:Delta G(T) = -109.5 *(1-(T+273.15)/ 330.28 )+ 3.6 *( 57.1 -T)+ 3.6 *(T+273.15)*log((T+273.15)/ 330.28 )
GCA_001428335.faa_MRF1.pdbA:Delta G(T) = -112.6 *(1-(T+273.15)/ 331.98 )+ 3.59 *( 58.8 -T)+ 3.59 *(T+273.15)*log((T+273.15)/ 331.98 )
GCA_001428365.faa_MRF1.pdbA:Delta G(T) = -109 *(1-(T+273.15)/ 326.9 )+ 3.83 *( 53.8 -T)+ 3.83 *(T+273.15)*log((T+273.15)/ 326.9 )
GCA_001428435.faa_MRF1.pdbA:Delta G(T) = -106.9 *(1-(T+273.15)/ 334.48 )+ 3.27 *( 61.3 -T)+ 3.27 *(T+273.15)*log((T+273.15)/ 334.48 )
GCA_001445575.faa_MRF1.pdbA:Delta G(T) = -72.4 *(1-(T+273.15)/ 323.55 )+ 2.72 *( 50.4 -T)+ 2.72 *(T+273.15)*log((T+273.15)/ 323.55 )
GCA_001457025.faa_MRF1.pdbA:Delta G(T) = -107.4 *(1-(T+273.15)/ 329.78 )+ 3.57 *( 56.6 -T)+ 3.57 *(T+273.15)*log((T+273.15)/ 329.78 )
GCA_001512285.faa_MRF1.pdbA:Delta G(T) = -95.6 *(1-(T+273.15)/ 329.14 )+ 3.22 *( 56 -T)+ 3.22 *(T+273.15)*log((T+273.15)/ 329.14 )
GCA_001512305.faa_MRF1.pdbA:Delta G(T) = -102.5 *(1-(T+273.15)/ 328.21 )+ 3.51 *( 55.1 -T)+ 3.51 *(T+273.15)*log((T+273.15)/ 328.21 )
GCA_001542565.faa_MRF1.pdbA:Delta G(T) = -100.8 *(1-(T+273.15)/ 329.99 )+ 3.34 *( 56.8 -T)+ 3.34 *(T+273.15)*log((T+273.15)/ 329.99 )
GCA_001552075.faa_MRF1.pdbA:Delta G(T) = -67.2 *(1-(T+273.15)/ 327 )+ 2.36 *( 53.9 -T)+ 2.36 *(T+273.15)*log((T+273.15)/ 327 )
GCA_001641125.faa_MRF1.pdbA:Delta G(T) = -109.7 *(1-(T+273.15)/ 328.55 )+ 3.73 *( 55.4 -T)+ 3.73 *(T+273.15)*log((T+273.15)/ 328.55 )
GCA_001663775.faa_MRF1.pdbA:Delta G(T) = -111.3 *(1-(T+273.15)/ 330.62 )+ 3.64 *( 57.5 -T)+ 3.64 *(T+273.15)*log((T+273.15)/ 330.62 )
GCA_001766675.faa_MRF1.pdbA:Delta G(T) = -77.9 *(1-(T+273.15)/ 325.79 )+ 2.79 *( 52.6 -T)+ 2.79 *(T+273.15)*log((T+273.15)/ 325.79 )
GCA_001854365.faa_MRF1.pdbA:Delta G(T) = -100.8 *(1-(T+273.15)/ 329.99 )+ 3.34 *( 56.8 -T)+ 3.34 *(T+273.15)*log((T+273.15)/ 329.99 )
GCA_001969265.faa_MRF1.pdbA:Delta G(T) = -103.6 *(1-(T+273.15)/ 329.04 )+ 3.49 *( 55.9 -T)+ 3.49 *(T+273.15)*log((T+273.15)/ 329.04 )
GCA_002008315.faa_MRF1.pdbA:Delta G(T) = -70.5 *(1-(T+273.15)/ 324.53 )+ 2.6 *( 51.4 -T)+ 2.6 *(T+273.15)*log((T+273.15)/ 324.53 )
GCA_002157505.faa_MRF1.pdbA:Delta G(T) = -66.7 *(1-(T+273.15)/ 334.9 )+ 2.02 *( 61.8 -T)+ 2.02 *(T+273.15)*log((T+273.15)/ 334.9 )
GCA_002157565.faa_MRF1.pdbA:Delta G(T) = -67.1 *(1-(T+273.15)/ 334.34 )+ 2.05 *( 61.2 -T)+ 2.05 *(T+273.15)*log((T+273.15)/ 334.34 )
GCA_002224285.faa_MRF1.pdbA:Delta G(T) = -72.9 *(1-(T+273.15)/ 326.49 )+ 2.58 *( 53.3 -T)+ 2.58 *(T+273.15)*log((T+273.15)/ 326.49 )
GCA_002849715.faa_MRF1.pdbA:Delta G(T) = -80.3 *(1-(T+273.15)/ 329.49 )+ 2.68 *( 56.3 -T)+ 2.68 *(T+273.15)*log((T+273.15)/ 329.49 )
GCA_002892795.faa_MRF1.pdbA:Delta G(T) = -108.6 *(1-(T+273.15)/ 329.56 )+ 3.62 *( 56.4 -T)+ 3.62 *(T+273.15)*log((T+273.15)/ 329.56 )
GCA_002892835.faa_MRF1.pdbA:Delta G(T) = -108.4 *(1-(T+273.15)/ 328.33 )+ 3.7 *( 55.2 -T)+ 3.7 *(T+273.15)*log((T+273.15)/ 328.33 )
GCA_002909415.faa_MRF1.pdbA:Delta G(T) = -74.2 *(1-(T+273.15)/ 324.32 )+ 2.74 *( 51.2 -T)+ 2.74 *(T+273.15)*log((T+273.15)/ 324.32 )
GCA_002929215.faa_MRF1.pdbA:Delta G(T) = -102.9 *(1-(T+273.15)/ 328.89 )+ 3.48 *( 55.7 -T)+ 3.48 *(T+273.15)*log((T+273.15)/ 328.89 )
GCA_002929255.faa_MRF1.pdbA:Delta G(T) = -74 *(1-(T+273.15)/ 328.74 )+ 2.51 *( 55.6 -T)+ 2.51 *(T+273.15)*log((T+273.15)/ 328.74 )
GCA_002929275.faa_MRF1.pdbA:Delta G(T) = -74 *(1-(T+273.15)/ 328.74 )+ 2.51 *( 55.6 -T)+ 2.51 *(T+273.15)*log((T+273.15)/ 328.74 )
GCA_002929295.faa_MRF1.pdbA:Delta G(T) = -103.5 *(1-(T+273.15)/ 335.33 )+ 3.12 *( 62.2 -T)+ 3.12 *(T+273.15)*log((T+273.15)/ 335.33 )
GCA_002929305.faa_MRF1.pdbA:Delta G(T) = -90 *(1-(T+273.15)/ 326.19 )+ 3.2 *( 53 -T)+ 3.2 *(T+273.15)*log((T+273.15)/ 326.19 )
GCA_002929335.faa_MRF1.pdbA:Delta G(T) = -111.4 *(1-(T+273.15)/ 330.13 )+ 3.68 *( 57 -T)+ 3.68 *(T+273.15)*log((T+273.15)/ 330.13 )
GCA_002929355.faa_MRF1.pdbA:Delta G(T) = -65 *(1-(T+273.15)/ 333.57 )+ 2.02 *( 60.4 -T)+ 2.02 *(T+273.15)*log((T+273.15)/ 333.57 )
GCA_002929375.faa_MRF1.pdbA:Delta G(T) = -69.5 *(1-(T+273.15)/ 335.08 )+ 2.1 *( 61.9 -T)+ 2.1 *(T+273.15)*log((T+273.15)/ 335.08 )
GCA_002929385.faa_MRF1.pdbA:Delta G(T) = -74 *(1-(T+273.15)/ 328.74 )+ 2.51 *( 55.6 -T)+ 2.51 *(T+273.15)*log((T+273.15)/ 328.74 )
GCA_002929455.faa_MRF1.pdbA:Delta G(T) = -74 *(1-(T+273.15)/ 328.74 )+ 2.51 *( 55.6 -T)+ 2.51 *(T+273.15)*log((T+273.15)/ 328.74 )
GCA_002929705.faa_MRF1.pdbA:Delta G(T) = -59.4 *(1-(T+273.15)/ 333.44 )+ 1.85 *( 60.3 -T)+ 1.85 *(T+273.15)*log((T+273.15)/ 333.44 )
GCA_002929745.faa_MRF1.pdbA:Delta G(T) = -78.1 *(1-(T+273.15)/ 327.68 )+ 2.7 *( 54.5 -T)+ 2.7 *(T+273.15)*log((T+273.15)/ 327.68 )
GCA_002929755.faa_MRF1.pdbA:Delta G(T) = -116.1 *(1-(T+273.15)/ 331.55 )+ 3.74 *( 58.4 -T)+ 3.74 *(T+273.15)*log((T+273.15)/ 331.55 )
GCA_002934405.faa_MRF1.pdbA:Delta G(T) = -111.4 *(1-(T+273.15)/ 328.54 )+ 3.79 *( 55.4 -T)+ 3.79 *(T+273.15)*log((T+273.15)/ 328.54 )
GCA_002953935.faa_MRF1.pdbA:Delta G(T) = -111.3 *(1-(T+273.15)/ 328.26 )+ 3.81 *( 55.1 -T)+ 3.81 *(T+273.15)*log((T+273.15)/ 328.26 )
GCA_002954225.faa_MRF1.pdbA:Delta G(T) = -105.3 *(1-(T+273.15)/ 333.14 )+ 3.29 *( 60 -T)+ 3.29 *(T+273.15)*log((T+273.15)/ 333.14 )
GCA_003097355.faa_MRF1.pdbA:Delta G(T) = -111.5 *(1-(T+273.15)/ 327.74 )+ 3.85 *( 54.6 -T)+ 3.85 *(T+273.15)*log((T+273.15)/ 327.74 )
GCA_003116525.faa_MRF1.pdbA:Delta G(T) = -112.1 *(1-(T+273.15)/ 329.33 )+ 3.76 *( 56.2 -T)+ 3.76 *(T+273.15)*log((T+273.15)/ 329.33 )
GCA_003185915.faa_MRF1.pdbA:Delta G(T) = -86.2 *(1-(T+273.15)/ 323.97 )+ 3.21 *( 50.8 -T)+ 3.21 *(T+273.15)*log((T+273.15)/ 323.97 )
GCA_003208335.faa_MRF1.pdbA:Delta G(T) = -80.7 *(1-(T+273.15)/ 324.02 )+ 3 *( 50.9 -T)+ 3 *(T+273.15)*log((T+273.15)/ 324.02 )
GCA_003219795.faa_MRF1.pdbA:Delta G(T) = -111.2 *(1-(T+273.15)/ 332.96 )+ 3.49 *( 59.8 -T)+ 3.49 *(T+273.15)*log((T+273.15)/ 332.96 )
GCA_003219815.faa_MRF1.pdbA:Delta G(T) = -61.4 *(1-(T+273.15)/ 333.04 )+ 1.92 *( 59.9 -T)+ 1.92 *(T+273.15)*log((T+273.15)/ 333.04 )
GCA_003268655.faa_MRF1.pdbA:Delta G(T) = -68.8 *(1-(T+273.15)/ 326.13 )+ 2.45 *( 53 -T)+ 2.45 *(T+273.15)*log((T+273.15)/ 326.13 )
GCA_003287955.faa_MRF1.pdbA:Delta G(T) = -114.7 *(1-(T+273.15)/ 330.84 )+ 3.74 *( 57.7 -T)+ 3.74 *(T+273.15)*log((T+273.15)/ 330.84 )
GCA_900016675.faa_MRF1.pdbA:Delta G(T) = -70.8 *(1-(T+273.15)/ 327.21 )+ 2.47 *( 54.1 -T)+ 2.47 *(T+273.15)*log((T+273.15)/ 327.21 )
GCA_900099735.faa_MRF1.pdbA:Delta G(T) = -71.4 *(1-(T+273.15)/ 329.32 )+ 2.39 *( 56.2 -T)+ 2.39 *(T+273.15)*log((T+273.15)/ 329.32 )
GCA_900099975.faa_MRF1.pdbA:Delta G(T) = -107.6 *(1-(T+273.15)/ 329.72 )+ 3.58 *( 56.6 -T)+ 3.58 *(T+273.15)*log((T+273.15)/ 329.72 )
GCA_900102785.faa_MRF1.pdbA:Delta G(T) = -113.6 *(1-(T+273.15)/ 326.35 )+ 4.03 *( 53.2 -T)+ 4.03 *(T+273.15)*log((T+273.15)/ 326.35 )
GCA_900102805.faa_MRF1.pdbA:Delta G(T) = -95.6 *(1-(T+273.15)/ 329.14 )+ 3.22 *( 56 -T)+ 3.22 *(T+273.15)*log((T+273.15)/ 329.14 )
GCA_900102895.faa_MRF1.pdbA:Delta G(T) = -110.3 *(1-(T+273.15)/ 327.65 )+ 3.82 *( 54.5 -T)+ 3.82 *(T+273.15)*log((T+273.15)/ 327.65 )
GCA_900104405.faa_MRF1.pdbA:Delta G(T) = -111.5 *(1-(T+273.15)/ 327.74 )+ 3.85 *( 54.6 -T)+ 3.85 *(T+273.15)*log((T+273.15)/ 327.74 )
GCA_900105345.faa_MRF1.pdbA:Delta G(T) = -104.1 *(1-(T+273.15)/ 329.26 )+ 3.49 *( 56.1 -T)+ 3.49 *(T+273.15)*log((T+273.15)/ 329.26 )
GCA_900105535.faa_MRF1.pdbA:Delta G(T) = -104.6 *(1-(T+273.15)/ 330.38 )+ 3.44 *( 57.2 -T)+ 3.44 *(T+273.15)*log((T+273.15)/ 330.38 )
GCA_900105965.faa_MRF1.pdbA:Delta G(T) = -78.5 *(1-(T+273.15)/ 328.29 )+ 2.68 *( 55.1 -T)+ 2.68 *(T+273.15)*log((T+273.15)/ 328.29 )
GCA_900106835.faa_MRF1.pdbA:Delta G(T) = -95.6 *(1-(T+273.15)/ 329.14 )+ 3.22 *( 56 -T)+ 3.22 *(T+273.15)*log((T+273.15)/ 329.14 )
GCA_900110595.faa_MRF1.pdbA:Delta G(T) = -63.2 *(1-(T+273.15)/ 324.63 )+ 2.32 *( 51.5 -T)+ 2.32 *(T+273.15)*log((T+273.15)/ 324.63 )
GCA_900116495.faa_MRF1.pdbA:Delta G(T) = -113.1 *(1-(T+273.15)/ 328.12 )+ 3.88 *( 55 -T)+ 3.88 *(T+273.15)*log((T+273.15)/ 328.12 )
GCA_900168135.faa_MRF1.pdbA:Delta G(T) = -105.9 *(1-(T+273.15)/ 328.12 )+ 3.63 *( 55 -T)+ 3.63 *(T+273.15)*log((T+273.15)/ 328.12 )
GCA_900168225.faa_MRF1.pdbA:Delta G(T) = -95.6 *(1-(T+273.15)/ 329.14 )+ 3.22 *( 56 -T)+ 3.22 *(T+273.15)*log((T+273.15)/ 329.14 )
GCA_000374945PPIA.pdbA:Delta G(T) = -105.6 *(1-(T+273.15)/ 337.21 )+ 2.42 *( 64.1 -T)+ 2.42 *(T+273.15)*log((T+273.15)/ 337.21 )
GCA_000468215PPIA.pdbA:Delta G(T) = -114 *(1-(T+273.15)/ 336.31 )+ 2.7 *( 63.2 -T)+ 2.7 *(T+273.15)*log((T+273.15)/ 336.31 )
GCA_000482545PPIA.pdbA:Delta G(T) = -110 *(1-(T+273.15)/ 337 )+ 2.41 *( 63.9 -T)+ 2.41 *(T+273.15)*log((T+273.15)/ 337 )
GCA_000514015PPIA.pdbA:Delta G(T) = -105.5 *(1-(T+273.15)/ 336.99 )+ 2.45 *( 63.8 -T)+ 2.45 *(T+273.15)*log((T+273.15)/ 336.99 )
GCA_000514155PPIA.pdbA:Delta G(T) = -105.5 *(1-(T+273.15)/ 336.99 )+ 2.45 *( 63.8 -T)+ 2.45 *(T+273.15)*log((T+273.15)/ 336.99 )
GCA_000517125PPIA.pdbA:Delta G(T) = -111.8 *(1-(T+273.15)/ 337.92 )+ 2.38 *( 64.8 -T)+ 2.38 *(T+273.15)*log((T+273.15)/ 337.92 )
GCA_000520555PPIA.pdbA:Delta G(T) = -107.7 *(1-(T+273.15)/ 335.75 )+ 2.32 *( 62.6 -T)+ 2.32 *(T+273.15)*log((T+273.15)/ 335.75 )
GCA_000520575PPIA.pdbA:Delta G(T) = -107.7 *(1-(T+273.15)/ 335.75 )+ 2.32 *( 62.6 -T)+ 2.32 *(T+273.15)*log((T+273.15)/ 335.75 )
GCA_000520595PPIA.pdbA:Delta G(T) = -110.4 *(1-(T+273.15)/ 335.52 )+ 2.39 *( 62.4 -T)+ 2.39 *(T+273.15)*log((T+273.15)/ 335.52 )
GCA_000620385PPIA.pdbA:Delta G(T) = -109.5 *(1-(T+273.15)/ 338.65 )+ 2.12 *( 65.5 -T)+ 2.12 *(T+273.15)*log((T+273.15)/ 338.65 )
GCA_000685965PPIA.pdbA:Delta G(T) = -106.3 *(1-(T+273.15)/ 338.48 )+ 2.17 *( 65.3 -T)+ 2.17 *(T+273.15)*log((T+273.15)/ 338.48 )
GCA_000755585PPIA.pdbA:Delta G(T) = -105.8 *(1-(T+273.15)/ 340.9 )+ 1.89 *( 67.7 -T)+ 1.89 *(T+273.15)*log((T+273.15)/ 340.9 )
GCA_000785535PPIA.pdbA:Delta G(T) = -112.1 *(1-(T+273.15)/ 340.62 )+ 2.4 *( 67.5 -T)+ 2.4 *(T+273.15)*log((T+273.15)/ 340.62 )
GCA_000813845PPIA.pdbA:Delta G(T) = -106.9 *(1-(T+273.15)/ 336.95 )+ 2.25 *( 63.8 -T)+ 2.25 *(T+273.15)*log((T+273.15)/ 336.95 )
GCA_000816565PPIA.pdbA:Delta G(T) = -108.9 *(1-(T+273.15)/ 335.71 )+ 2.35 *( 62.6 -T)+ 2.35 *(T+273.15)*log((T+273.15)/ 335.71 )
GCA_000876655PPIA.pdbA:Delta G(T) = -104.3 *(1-(T+273.15)/ 337.54 )+ 2.25 *( 64.4 -T)+ 2.25 *(T+273.15)*log((T+273.15)/ 337.54 )
GCA_000962805PPIA.pdbA:Delta G(T) = -108.1 *(1-(T+273.15)/ 339.17 )+ 2.1 *( 66 -T)+ 2.1 *(T+273.15)*log((T+273.15)/ 339.17 )
GCA_001046895PPIA.pdbA:Delta G(T) = -105.8 *(1-(T+273.15)/ 337.52 )+ 2.09 *( 64.4 -T)+ 2.09 *(T+273.15)*log((T+273.15)/ 337.52 )
GCA_001187915PPIA.pdbA:Delta G(T) = -113.2 *(1-(T+273.15)/ 339.14 )+ 2.56 *( 66 -T)+ 2.56 *(T+273.15)*log((T+273.15)/ 339.14 )
GCA_001238605PPIA.pdbA:Delta G(T) = -108.4 *(1-(T+273.15)/ 336.94 )+ 2.21 *( 63.8 -T)+ 2.21 *(T+273.15)*log((T+273.15)/ 336.94 )
GCA_001281315PPIA.pdbA:Delta G(T) = -111.3 *(1-(T+273.15)/ 339.41 )+ 2.58 *( 66.3 -T)+ 2.58 *(T+273.15)*log((T+273.15)/ 339.41 )
GCA_001294625PPIA.pdbA:Delta G(T) = -112.2 *(1-(T+273.15)/ 337.16 )+ 2.75 *( 64 -T)+ 2.75 *(T+273.15)*log((T+273.15)/ 337.16 )
GCA_001307035PPIA.pdbA:Delta G(T) = -111.2 *(1-(T+273.15)/ 338.14 )+ 2.52 *( 65 -T)+ 2.52 *(T+273.15)*log((T+273.15)/ 338.14 )
GCA_001373495PPIA.pdbA:Delta G(T) = -109.3 *(1-(T+273.15)/ 336.71 )+ 2.46 *( 63.6 -T)+ 2.46 *(T+273.15)*log((T+273.15)/ 336.71 )
GCA_001422645PPIA.pdbA:Delta G(T) = -110.6 *(1-(T+273.15)/ 339.14 )+ 2.21 *( 66 -T)+ 2.21 *(T+273.15)*log((T+273.15)/ 339.14 )
GCA_001422665PPIA.pdbA:Delta G(T) = -109.4 *(1-(T+273.15)/ 337.19 )+ 2.3 *( 64 -T)+ 2.3 *(T+273.15)*log((T+273.15)/ 337.19 )
GCA_001423525PPIA.pdbA:Delta G(T) = -107.1 *(1-(T+273.15)/ 338.21 )+ 2.1 *( 65.1 -T)+ 2.1 *(T+273.15)*log((T+273.15)/ 338.21 )
GCA_001423745PPIA.pdbA:Delta G(T) = -106.3 *(1-(T+273.15)/ 338.48 )+ 2.17 *( 65.3 -T)+ 2.17 *(T+273.15)*log((T+273.15)/ 338.48 )
GCA_001424565PPIA.pdbA:Delta G(T) = -110.2 *(1-(T+273.15)/ 338.31 )+ 2.28 *( 65.2 -T)+ 2.28 *(T+273.15)*log((T+273.15)/ 338.31 )
GCA_001428005PPIA.pdbA:Delta G(T) = -108.1 *(1-(T+273.15)/ 337.84 )+ 2.12 *( 64.7 -T)+ 2.12 *(T+273.15)*log((T+273.15)/ 337.84 )
GCA_001428075PPIA.pdbA:Delta G(T) = -106.9 *(1-(T+273.15)/ 337.05 )+ 2.24 *( 63.9 -T)+ 2.24 *(T+273.15)*log((T+273.15)/ 337.05 )
GCA_001428325PPIA.pdbA:Delta G(T) = -106.7 *(1-(T+273.15)/ 336.73 )+ 2.34 *( 63.6 -T)+ 2.34 *(T+273.15)*log((T+273.15)/ 336.73 )
GCA_001428335PPIA.pdbA:Delta G(T) = -110.8 *(1-(T+273.15)/ 339.47 )+ 2.42 *( 66.3 -T)+ 2.42 *(T+273.15)*log((T+273.15)/ 339.47 )
GCA_001428365PPIA.pdbA:Delta G(T) = -109 *(1-(T+273.15)/ 338.67 )+ 2.17 *( 65.5 -T)+ 2.17 *(T+273.15)*log((T+273.15)/ 338.67 )
GCA_001428435PPIA.pdbA:Delta G(T) = -107.7 *(1-(T+273.15)/ 335.4 )+ 2.38 *( 62.3 -T)+ 2.38 *(T+273.15)*log((T+273.15)/ 335.4 )
GCA_001445575PPIA.pdbA:Delta G(T) = -113 *(1-(T+273.15)/ 339.25 )+ 2.53 *( 66.1 -T)+ 2.53 *(T+273.15)*log((T+273.15)/ 339.25 )
GCA_001457025PPIA.pdbA:Delta G(T) = -107.4 *(1-(T+273.15)/ 337.54 )+ 2.13 *( 64.4 -T)+ 2.13 *(T+273.15)*log((T+273.15)/ 337.54 )
GCA_001512285PPIA.pdbA:Delta G(T) = -110.7 *(1-(T+273.15)/ 337.99 )+ 2.35 *( 64.8 -T)+ 2.35 *(T+273.15)*log((T+273.15)/ 337.99 )
GCA_001512305PPIA.pdbA:Delta G(T) = -108.8 *(1-(T+273.15)/ 339.47 )+ 2.3 *( 66.3 -T)+ 2.3 *(T+273.15)*log((T+273.15)/ 339.47 )
GCA_001542565PPIA.pdbA:Delta G(T) = -109.6 *(1-(T+273.15)/ 338.53 )+ 2.37 *( 65.4 -T)+ 2.37 *(T+273.15)*log((T+273.15)/ 338.53 )
GCA_001552075PPIA.pdbA:Delta G(T) = -110.9 *(1-(T+273.15)/ 335.89 )+ 2.65 *( 62.7 -T)+ 2.65 *(T+273.15)*log((T+273.15)/ 335.89 )
GCA_001641125PPIA.pdbA:Delta G(T) = -107.2 *(1-(T+273.15)/ 337.33 )+ 2.03 *( 64.2 -T)+ 2.03 *(T+273.15)*log((T+273.15)/ 337.33 )
GCA_001663775PPIA.pdbA:Delta G(T) = -107.3 *(1-(T+273.15)/ 337.95 )+ 2.25 *( 64.8 -T)+ 2.25 *(T+273.15)*log((T+273.15)/ 337.95 )
GCA_001750145PPIA.pdbA:Delta G(T) = -110.2 *(1-(T+273.15)/ 338.83 )+ 2.17 *( 65.7 -T)+ 2.17 *(T+273.15)*log((T+273.15)/ 338.83 )
GCA_001766675PPIA.pdbA:Delta G(T) = -111.4 *(1-(T+273.15)/ 339.09 )+ 2.28 *( 65.9 -T)+ 2.28 *(T+273.15)*log((T+273.15)/ 339.09 )
GCA_001854365PPIA.pdbA:Delta G(T) = -109.8 *(1-(T+273.15)/ 339.71 )+ 2.33 *( 66.6 -T)+ 2.33 *(T+273.15)*log((T+273.15)/ 339.71 )
GCA_001969265PPIA.pdbA:Delta G(T) = -106.6 *(1-(T+273.15)/ 337.16 )+ 2.17 *( 64 -T)+ 2.17 *(T+273.15)*log((T+273.15)/ 337.16 )
GCA_002008315PPIA.pdbA:Delta G(T) = -108.1 *(1-(T+273.15)/ 337.76 )+ 1.92 *( 64.6 -T)+ 1.92 *(T+273.15)*log((T+273.15)/ 337.76 )
GCA_002157505PPIA.pdbA:Delta G(T) = -107.9 *(1-(T+273.15)/ 337.62 )+ 2.23 *( 64.5 -T)+ 2.23 *(T+273.15)*log((T+273.15)/ 337.62 )
GCA_002157565PPIA.pdbA:Delta G(T) = -108.7 *(1-(T+273.15)/ 337.33 )+ 2.42 *( 64.2 -T)+ 2.42 *(T+273.15)*log((T+273.15)/ 337.33 )
GCA_002224285PPIA.pdbA:Delta G(T) = -105.5 *(1-(T+273.15)/ 336.99 )+ 2.45 *( 63.8 -T)+ 2.45 *(T+273.15)*log((T+273.15)/ 336.99 )
GCA_002849715PPIA.pdbA:Delta G(T) = -106 *(1-(T+273.15)/ 335.59 )+ 2.5 *( 62.4 -T)+ 2.5 *(T+273.15)*log((T+273.15)/ 335.59 )
GCA_002892795PPIA.pdbA:Delta G(T) = -108.8 *(1-(T+273.15)/ 339.25 )+ 2.22 *( 66.1 -T)+ 2.22 *(T+273.15)*log((T+273.15)/ 339.25 )
GCA_002892835PPIA.pdbA:Delta G(T) = -108.7 *(1-(T+273.15)/ 337.9 )+ 2.33 *( 64.7 -T)+ 2.33 *(T+273.15)*log((T+273.15)/ 337.9 )
GCA_002909415PPIA.pdbA:Delta G(T) = -112.6 *(1-(T+273.15)/ 340.13 )+ 2.48 *( 67 -T)+ 2.48 *(T+273.15)*log((T+273.15)/ 340.13 )
GCA_002929215PPIA.pdbA:Delta G(T) = -107.3 *(1-(T+273.15)/ 337.84 )+ 2.09 *( 64.7 -T)+ 2.09 *(T+273.15)*log((T+273.15)/ 337.84 )
GCA_002929255PPIA.pdbA:Delta G(T) = -105 *(1-(T+273.15)/ 336.03 )+ 2.08 *( 62.9 -T)+ 2.08 *(T+273.15)*log((T+273.15)/ 336.03 )
GCA_002929275PPIA.pdbA:Delta G(T) = -105 *(1-(T+273.15)/ 336.03 )+ 2.08 *( 62.9 -T)+ 2.08 *(T+273.15)*log((T+273.15)/ 336.03 )
GCA_002929295PPIA.pdbA:Delta G(T) = -109.4 *(1-(T+273.15)/ 336.04 )+ 2.51 *( 62.9 -T)+ 2.51 *(T+273.15)*log((T+273.15)/ 336.04 )
GCA_002929305PPIA.pdbA:Delta G(T) = -111.6 *(1-(T+273.15)/ 337.02 )+ 2.73 *( 63.9 -T)+ 2.73 *(T+273.15)*log((T+273.15)/ 337.02 )
GCA_002929335PPIA.pdbA:Delta G(T) = -106.1 *(1-(T+273.15)/ 338.12 )+ 2.16 *( 65 -T)+ 2.16 *(T+273.15)*log((T+273.15)/ 338.12 )
GCA_002929355PPIA.pdbA:Delta G(T) = -108.4 *(1-(T+273.15)/ 337.39 )+ 2.41 *( 64.2 -T)+ 2.41 *(T+273.15)*log((T+273.15)/ 337.39 )
GCA_002929375PPIA.pdbA:Delta G(T) = -109 *(1-(T+273.15)/ 337.45 )+ 2.38 *( 64.3 -T)+ 2.38 *(T+273.15)*log((T+273.15)/ 337.45 )
GCA_002929385PPIA.pdbA:Delta G(T) = -105 *(1-(T+273.15)/ 336.03 )+ 2.08 *( 62.9 -T)+ 2.08 *(T+273.15)*log((T+273.15)/ 336.03 )
GCA_002929455PPIA.pdbA:Delta G(T) = -105 *(1-(T+273.15)/ 336.03 )+ 2.08 *( 62.9 -T)+ 2.08 *(T+273.15)*log((T+273.15)/ 336.03 )
GCA_002929705PPIA.pdbA:Delta G(T) = -113 *(1-(T+273.15)/ 339.25 )+ 2.53 *( 66.1 -T)+ 2.53 *(T+273.15)*log((T+273.15)/ 339.25 )
GCA_002929745PPIA.pdbA:Delta G(T) = -105.4 *(1-(T+273.15)/ 335.32 )+ 2.19 *( 62.2 -T)+ 2.19 *(T+273.15)*log((T+273.15)/ 335.32 )
GCA_002929755PPIA.pdbA:Delta G(T) = -111.9 *(1-(T+273.15)/ 340.04 )+ 2.45 *( 66.9 -T)+ 2.45 *(T+273.15)*log((T+273.15)/ 340.04 )
GCA_002934405PPIA.pdbA:Delta G(T) = -105.5 *(1-(T+273.15)/ 336.22 )+ 2.33 *( 63.1 -T)+ 2.33 *(T+273.15)*log((T+273.15)/ 336.22 )
GCA_002953935PPIA.pdbA:Delta G(T) = -106.8 *(1-(T+273.15)/ 337.6 )+ 2.24 *( 64.5 -T)+ 2.24 *(T+273.15)*log((T+273.15)/ 337.6 )
GCA_002954225PPIA.pdbA:Delta G(T) = -108.9 *(1-(T+273.15)/ 337.58 )+ 2.34 *( 64.4 -T)+ 2.34 *(T+273.15)*log((T+273.15)/ 337.58 )
GCA_003097355PPIA.pdbA:Delta G(T) = -109.8 *(1-(T+273.15)/ 338.88 )+ 2.12 *( 65.7 -T)+ 2.12 *(T+273.15)*log((T+273.15)/ 338.88 )
GCA_003116525PPIA.pdbA:Delta G(T) = -106 *(1-(T+273.15)/ 337.58 )+ 2.2 *( 64.4 -T)+ 2.2 *(T+273.15)*log((T+273.15)/ 337.58 )
GCA_003185915PPIA.pdbA:Delta G(T) = -111.5 *(1-(T+273.15)/ 340.08 )+ 2.56 *( 66.9 -T)+ 2.56 *(T+273.15)*log((T+273.15)/ 340.08 )
GCA_003208335PPIA.pdbA:Delta G(T) = -106.9 *(1-(T+273.15)/ 335.75 )+ 2.33 *( 62.6 -T)+ 2.33 *(T+273.15)*log((T+273.15)/ 335.75 )
GCA_003219795PPIA.pdbA:Delta G(T) = -113.4 *(1-(T+273.15)/ 340.37 )+ 2.61 *( 67.2 -T)+ 2.61 *(T+273.15)*log((T+273.15)/ 340.37 )
GCA_003219815PPIA.pdbA:Delta G(T) = -112.7 *(1-(T+273.15)/ 337.67 )+ 2.43 *( 64.5 -T)+ 2.43 *(T+273.15)*log((T+273.15)/ 337.67 )
GCA_003268655PPIA.pdbA:Delta G(T) = -108.8 *(1-(T+273.15)/ 338.7 )+ 2.28 *( 65.5 -T)+ 2.28 *(T+273.15)*log((T+273.15)/ 338.7 )
GCA_003287955PPIA.pdbA:Delta G(T) = -110.9 *(1-(T+273.15)/ 339.19 )+ 2.43 *( 66 -T)+ 2.43 *(T+273.15)*log((T+273.15)/ 339.19 )
GCA_900016675PPIA.pdbA:Delta G(T) = -108.5 *(1-(T+273.15)/ 337.33 )+ 2.52 *( 64.2 -T)+ 2.52 *(T+273.15)*log((T+273.15)/ 337.33 )
GCA_900099735PPIA.pdbA:Delta G(T) = -107.1 *(1-(T+273.15)/ 336.16 )+ 2.43 *( 63 -T)+ 2.43 *(T+273.15)*log((T+273.15)/ 336.16 )
GCA_900099975PPIA.pdbA:Delta G(T) = -108.9 *(1-(T+273.15)/ 338.08 )+ 2.37 *( 64.9 -T)+ 2.37 *(T+273.15)*log((T+273.15)/ 338.08 )
GCA_900102785PPIA.pdbA:Delta G(T) = -110.4 *(1-(T+273.15)/ 339.07 )+ 2.12 *( 65.9 -T)+ 2.12 *(T+273.15)*log((T+273.15)/ 339.07 )
GCA_900102805PPIA.pdbA:Delta G(T) = -105.5 *(1-(T+273.15)/ 336.99 )+ 2.45 *( 63.8 -T)+ 2.45 *(T+273.15)*log((T+273.15)/ 336.99 )
GCA_900102895PPIA.pdbA:Delta G(T) = -109.6 *(1-(T+273.15)/ 338.71 )+ 2.1 *( 65.6 -T)+ 2.1 *(T+273.15)*log((T+273.15)/ 338.71 )
GCA_900104405PPIA.pdbA:Delta G(T) = -109.6 *(1-(T+273.15)/ 338.59 )+ 2.16 *( 65.4 -T)+ 2.16 *(T+273.15)*log((T+273.15)/ 338.59 )
GCA_900105345PPIA.pdbA:Delta G(T) = -108.3 *(1-(T+273.15)/ 336.98 )+ 2.16 *( 63.8 -T)+ 2.16 *(T+273.15)*log((T+273.15)/ 336.98 )
GCA_900105535PPIA.pdbA:Delta G(T) = -107.8 *(1-(T+273.15)/ 339.46 )+ 2.12 *( 66.3 -T)+ 2.12 *(T+273.15)*log((T+273.15)/ 339.46 )
GCA_900105965PPIA.pdbA:Delta G(T) = -112.3 *(1-(T+273.15)/ 341.96 )+ 2.57 *( 68.8 -T)+ 2.57 *(T+273.15)*log((T+273.15)/ 341.96 )
GCA_900106835PPIA.pdbA:Delta G(T) = -105.9 *(1-(T+273.15)/ 336.74 )+ 2.47 *( 63.6 -T)+ 2.47 *(T+273.15)*log((T+273.15)/ 336.74 )
GCA_900110595PPIA.pdbA:Delta G(T) = -107.9 *(1-(T+273.15)/ 337.79 )+ 2.23 *( 64.6 -T)+ 2.23 *(T+273.15)*log((T+273.15)/ 337.79 )
GCA_900116495PPIA.pdbA:Delta G(T) = -109 *(1-(T+273.15)/ 338.07 )+ 2.24 *( 64.9 -T)+ 2.24 *(T+273.15)*log((T+273.15)/ 338.07 )
GCA_900168135PPIA.pdbA:Delta G(T) = -109.5 *(1-(T+273.15)/ 338.65 )+ 2.12 *( 65.5 -T)+ 2.12 *(T+273.15)*log((T+273.15)/ 338.65 )
GCA_900168225PPIA.pdbA:Delta G(T) = -105.6 *(1-(T+273.15)/ 337.21 )+ 2.42 *( 64.1 -T)+ 2.42 *(T+273.15)*log((T+273.15)/ 337.21 )
GCA_000014925PPIA.pdbA:Delta G(T) = -110.1 *(1-(T+273.15)/ 338.51 )+ 2.36 *( 65.4 -T)+ 2.36 *(T+273.15)*log((T+273.15)/ 338.51 )
GCA_000022025PPIA.pdbA:Delta G(T) = -108.1 *(1-(T+273.15)/ 339.17 )+ 2.1 *( 66 -T)+ 2.1 *(T+273.15)*log((T+273.15)/ 339.17 )
GCA_000189535PPIA.pdbA:Delta G(T) = -106.9 *(1-(T+273.15)/ 337.05 )+ 2.24 *( 63.9 -T)+ 2.24 *(T+273.15)*log((T+273.15)/ 337.05 )
GCA_000196235PPIA.pdbA:Delta G(T) = -107 *(1-(T+273.15)/ 338.24 )+ 2.25 *( 65.1 -T)+ 2.25 *(T+273.15)*log((T+273.15)/ 338.24 )
GCA_000238915PPIA.pdbA:Delta G(T) = -108 *(1-(T+273.15)/ 338.97 )+ 2.15 *( 65.8 -T)+ 2.15 *(T+273.15)*log((T+273.15)/ 338.97 )
GCA_000281065PPIA.pdbA:Delta G(T) = -110 *(1-(T+273.15)/ 339.26 )+ 2.32 *( 66.1 -T)+ 2.32 *(T+273.15)*log((T+273.15)/ 339.26 )
GCA_000294595PPIA.pdbA:Delta G(T) = -114 *(1-(T+273.15)/ 336.31 )+ 2.7 *( 63.2 -T)+ 2.7 *(T+273.15)*log((T+273.15)/ 336.31 )
GCA_000294695PPIA.pdbA:Delta G(T) = -110.1 *(1-(T+273.15)/ 338.51 )+ 2.36 *( 65.4 -T)+ 2.36 *(T+273.15)*log((T+273.15)/ 338.51 )
GCA_000332815PPIA.pdbA:Delta G(T) = -106.4 *(1-(T+273.15)/ 336.84 )+ 2.25 *( 63.7 -T)+ 2.25 *(T+273.15)*log((T+273.15)/ 336.84 )
GCA_000374865PPIA.pdbA:Delta G(T) = -106 *(1-(T+273.15)/ 337.58 )+ 2.2 *( 64.4 -T)+ 2.2 *(T+273.15)*log((T+273.15)/ 337.58 )
GCA_000374905PPIA.pdbA:Delta G(T) = -107.1 *(1-(T+273.15)/ 337.05 )+ 2.21 *( 63.9 -T)+ 2.21 *(T+273.15)*log((T+273.15)/ 337.05 )
GCA_000374925PPIA.pdbA:Delta G(T) = -110.7 *(1-(T+273.15)/ 338.43 )+ 2.14 *( 65.3 -T)+ 2.14 *(T+273.15)*log((T+273.15)/ 338.43 )
GCA_000374865SCO5184.pdbA:Delta G(T) = 83.4 *(1-(T+273.15)/ 332.7 )+ -2.63 *( 59.6 -T)+ -2.63 *(T+273.15)*log((T+273.15)/ 332.7 )
GCA_000374945SCO5184.pdbA:Delta G(T) = 81.4 *(1-(T+273.15)/ 348.42 )+ -2 *( 75.3 -T)+ -2 *(T+273.15)*log((T+273.15)/ 348.42 )
GCA_000468215SCO5184.pdbA:Delta G(T) = 108.4 *(1-(T+273.15)/ 346.33 )+ -2.75 *( 73.2 -T)+ -2.75 *(T+273.15)*log((T+273.15)/ 346.33 )
GCA_000482545SCO5184.pdbA:Delta G(T) = 71.3 *(1-(T+273.15)/ 339.13 )+ -2.02 *( 66 -T)+ -2.02 *(T+273.15)*log((T+273.15)/ 339.13 )
GCA_000514015SCO5184.pdbA:Delta G(T) = 122.2 *(1-(T+273.15)/ 347.84 )+ -3.03 *( 74.7 -T)+ -3.03 *(T+273.15)*log((T+273.15)/ 347.84 )
GCA_000514155SCO5184.pdbA:Delta G(T) = 110.1 *(1-(T+273.15)/ 349.22 )+ -2.68 *( 76.1 -T)+ -2.68 *(T+273.15)*log((T+273.15)/ 349.22 )
GCA_000517125SCO5184.pdbA:Delta G(T) = 67.5 *(1-(T+273.15)/ 334.29 )+ -2.07 *( 61.1 -T)+ -2.07 *(T+273.15)*log((T+273.15)/ 334.29 )
GCA_000520555SCO5184.pdbA:Delta G(T) = -48.5 *(1-(T+273.15)/ 343.58 )+ 1.28 *( 70.4 -T)+ 1.28 *(T+273.15)*log((T+273.15)/ 343.58 )
GCA_000520575SCO5184.pdbA:Delta G(T) = -48.5 *(1-(T+273.15)/ 343.58 )+ 1.28 *( 70.4 -T)+ 1.28 *(T+273.15)*log((T+273.15)/ 343.58 )
GCA_000520595SCO5184.pdbA:Delta G(T) = -12.9 *(1-(T+273.15)/ 338.67 )+ 0.37 *( 65.5 -T)+ 0.37 *(T+273.15)*log((T+273.15)/ 338.67 )
GCA_000620385SCO5184.pdbA:Delta G(T) = -7.1 *(1-(T+273.15)/ 334.67 )+ 0.22 *( 61.5 -T)+ 0.22 *(T+273.15)*log((T+273.15)/ 334.67 )
GCA_000685965SCO5184.pdbA:Delta G(T) = 59.4 *(1-(T+273.15)/ 333.55 )+ -1.85 *( 60.4 -T)+ -1.85 *(T+273.15)*log((T+273.15)/ 333.55 )
GCA_000755585SCO5184.pdbA:Delta G(T) = -12.4 *(1-(T+273.15)/ 323.23 )+ 0.47 *( 50.1 -T)+ 0.47 *(T+273.15)*log((T+273.15)/ 323.23 )
GCA_000785535SCO5184.pdbA:Delta G(T) = 166.2 *(1-(T+273.15)/ 338.87 )+ -4.72 *( 65.7 -T)+ -4.72 *(T+273.15)*log((T+273.15)/ 338.87 )
GCA_000813845SCO5184.pdbA:Delta G(T) = 47.3 *(1-(T+273.15)/ 335.13 )+ -1.43 *( 62 -T)+ -1.43 *(T+273.15)*log((T+273.15)/ 335.13 )
GCA_000816565SCO5184.pdbA:Delta G(T) = 121.2 *(1-(T+273.15)/ 339.78 )+ -3.39 *( 66.6 -T)+ -3.39 *(T+273.15)*log((T+273.15)/ 339.78 )
GCA_000876655SCO5184.pdbA:Delta G(T) = -206.1 *(1-(T+273.15)/ 350.28 )+ 4.94 *( 77.1 -T)+ 4.94 *(T+273.15)*log((T+273.15)/ 350.28 )
GCA_000962805SCO5184.pdbA:Delta G(T) = 42.2 *(1-(T+273.15)/ 335.37 )+ -1.27 *( 62.2 -T)+ -1.27 *(T+273.15)*log((T+273.15)/ 335.37 )
GCA_001046895SCO5184.pdbA:Delta G(T) = 86.3 *(1-(T+273.15)/ 331.05 )+ -2.8 *( 57.9 -T)+ -2.8 *(T+273.15)*log((T+273.15)/ 331.05 )
GCA_001187915SCO5184.pdbA:Delta G(T) = 111.4 *(1-(T+273.15)/ 330.05 )+ -3.68 *( 56.9 -T)+ -3.68 *(T+273.15)*log((T+273.15)/ 330.05 )
GCA_001238605SCO5184.pdbA:Delta G(T) = -93.2 *(1-(T+273.15)/ 343.17 )+ 0.9 *( 70 -T)+ 0.9 *(T+273.15)*log((T+273.15)/ 343.17 )
GCA_001281315SCO5184.pdbA:Delta G(T) = 99.4 *(1-(T+273.15)/ 331.85 )+ -3.18 *( 58.7 -T)+ -3.18 *(T+273.15)*log((T+273.15)/ 331.85 )
GCA_001294625SCO5184.pdbA:Delta G(T) = -20.7 *(1-(T+273.15)/ 337.43 )+ 0.6 *( 64.3 -T)+ 0.6 *(T+273.15)*log((T+273.15)/ 337.43 )
GCA_001307035SCO5184.pdbA:Delta G(T) = 89.7 *(1-(T+273.15)/ 335.35 )+ -2.7 *( 62.2 -T)+ -2.7 *(T+273.15)*log((T+273.15)/ 335.35 )
GCA_001373495SCO5184.pdbA:Delta G(T) = 57.7 *(1-(T+273.15)/ 328.35 )+ -1.97 *( 55.2 -T)+ -1.97 *(T+273.15)*log((T+273.15)/ 328.35 )
GCA_001422645SCO5184.pdbA:Delta G(T) = 23.2 *(1-(T+273.15)/ 339.63 )+ -0.65 *( 66.5 -T)+ -0.65 *(T+273.15)*log((T+273.15)/ 339.63 )
GCA_001422665SCO5184.pdbA:Delta G(T) = 93.7 *(1-(T+273.15)/ 339.23 )+ -2.64 *( 66.1 -T)+ -2.64 *(T+273.15)*log((T+273.15)/ 339.23 )
GCA_001423525SCO5184.pdbA:Delta G(T) = 45.2 *(1-(T+273.15)/ 337.23 )+ -1.32 *( 64.1 -T)+ -1.32 *(T+273.15)*log((T+273.15)/ 337.23 )
GCA_001423745SCO5184.pdbA:Delta G(T) = 74.5 *(1-(T+273.15)/ 337.72 )+ -2.16 *( 64.6 -T)+ -2.16 *(T+273.15)*log((T+273.15)/ 337.72 )
GCA_001424565SCO5184.pdbA:Delta G(T) = 110.6 *(1-(T+273.15)/ 338.07 )+ -3.18 *( 64.9 -T)+ -3.18 *(T+273.15)*log((T+273.15)/ 338.07 )
GCA_001428005SCO5184.pdbA:Delta G(T) = 80 *(1-(T+273.15)/ 334.78 )+ -2.43 *( 61.6 -T)+ -2.43 *(T+273.15)*log((T+273.15)/ 334.78 )
GCA_001428075SCO5184.pdbA:Delta G(T) = 81.4 *(1-(T+273.15)/ 328.92 )+ -2.75 *( 55.8 -T)+ -2.75 *(T+273.15)*log((T+273.15)/ 328.92 )
GCA_001428325SCO5184.pdbA:Delta G(T) = 24.3 *(1-(T+273.15)/ 337.54 )+ -0.7 *( 64.4 -T)+ -0.7 *(T+273.15)*log((T+273.15)/ 337.54 )
GCA_001428335SCO5184.pdbA:Delta G(T) = -24.4 *(1-(T+273.15)/ 333.19 )+ 0.76 *( 60 -T)+ 0.76 *(T+273.15)*log((T+273.15)/ 333.19 )
GCA_001428365SCO5184.pdbA:Delta G(T) = 13.9 *(1-(T+273.15)/ 336.08 )+ -0.41 *( 62.9 -T)+ -0.41 *(T+273.15)*log((T+273.15)/ 336.08 )
GCA_001428435SCO5184.pdbA:Delta G(T) = 96.9 *(1-(T+273.15)/ 336.35 )+ -2.87 *( 63.2 -T)+ -2.87 *(T+273.15)*log((T+273.15)/ 336.35 )
GCA_001445575SCO5184.pdbA:Delta G(T) = 112.2 *(1-(T+273.15)/ 339.89 )+ -3.13 *( 66.7 -T)+ -3.13 *(T+273.15)*log((T+273.15)/ 339.89 )
GCA_001457025SCO5184.pdbA:Delta G(T) = 48.8 *(1-(T+273.15)/ 338.22 )+ -1.4 *( 65.1 -T)+ -1.4 *(T+273.15)*log((T+273.15)/ 338.22 )
GCA_001512285SCO5184.pdbA:Delta G(T) = 149 *(1-(T+273.15)/ 338.03 )+ -4.29 *( 64.9 -T)+ -4.29 *(T+273.15)*log((T+273.15)/ 338.03 )
GCA_001512305SCO5184.pdbA:Delta G(T) = 20.9 *(1-(T+273.15)/ 336.27 )+ -0.62 *( 63.1 -T)+ -0.62 *(T+273.15)*log((T+273.15)/ 336.27 )
GCA_001542565SCO5184.pdbA:Delta G(T) = 138.1 *(1-(T+273.15)/ 341.95 )+ -3.73 *( 68.8 -T)+ -3.73 *(T+273.15)*log((T+273.15)/ 341.95 )
GCA_001552075SCO5184.pdbA:Delta G(T) = 65 *(1-(T+273.15)/ 343.71 )+ -1.71 *( 70.6 -T)+ -1.71 *(T+273.15)*log((T+273.15)/ 343.71 )
GCA_001641125SCO5184.pdbA:Delta G(T) = 62 *(1-(T+273.15)/ 336.43 )+ -1.83 *( 63.3 -T)+ -1.83 *(T+273.15)*log((T+273.15)/ 336.43 )
GCA_001663775SCO5184.pdbA:Delta G(T) = 63 *(1-(T+273.15)/ 321.54 )+ -2.47 *( 48.4 -T)+ -2.47 *(T+273.15)*log((T+273.15)/ 321.54 )
GCA_001750145SCO5184.pdbA:Delta G(T) = 105.9 *(1-(T+273.15)/ 338.44 )+ -3.03 *( 65.3 -T)+ -3.03 *(T+273.15)*log((T+273.15)/ 338.44 )
GCA_001766675SCO5184.pdbA:Delta G(T) = 41.5 *(1-(T+273.15)/ 335.41 )+ -1.25 *( 62.3 -T)+ -1.25 *(T+273.15)*log((T+273.15)/ 335.41 )
GCA_001854365SCO5184.pdbA:Delta G(T) = 143 *(1-(T+273.15)/ 339.12 )+ -4.05 *( 66 -T)+ -4.05 *(T+273.15)*log((T+273.15)/ 339.12 )
GCA_001969265SCO5184.pdbA:Delta G(T) = 63.1 *(1-(T+273.15)/ 344.69 )+ -1.64 *( 71.5 -T)+ -1.64 *(T+273.15)*log((T+273.15)/ 344.69 )
GCA_002008315SCO5184.pdbA:Delta G(T) = 86.6 *(1-(T+273.15)/ 325.38 )+ -3.14 *( 52.2 -T)+ -3.14 *(T+273.15)*log((T+273.15)/ 325.38 )
GCA_002157505SCO5184.pdbA:Delta G(T) = 28.6 *(1-(T+273.15)/ 335.71 )+ -0.86 *( 62.6 -T)+ -0.86 *(T+273.15)*log((T+273.15)/ 335.71 )
GCA_002157565SCO5184.pdbA:Delta G(T) = 83 *(1-(T+273.15)/ 334.74 )+ -2.52 *( 61.6 -T)+ -2.52 *(T+273.15)*log((T+273.15)/ 334.74 )
GCA_002224285SCO5184.pdbA:Delta G(T) = 76.6 *(1-(T+273.15)/ 344.62 )+ -1.99 *( 71.5 -T)+ -1.99 *(T+273.15)*log((T+273.15)/ 344.62 )
GCA_002849715SCO5184.pdbA:Delta G(T) = 90 *(1-(T+273.15)/ 334.06 )+ -2.77 *( 60.9 -T)+ -2.77 *(T+273.15)*log((T+273.15)/ 334.06 )
GCA_002892795SCO5184.pdbA:Delta G(T) = 149.6 *(1-(T+273.15)/ 335.85 )+ -4.46 *( 62.7 -T)+ -4.46 *(T+273.15)*log((T+273.15)/ 335.85 )
GCA_002892835SCO5184.pdbA:Delta G(T) = 2.7 *(1-(T+273.15)/ 337.61 )+ -0.08 *( 64.5 -T)+ -0.08 *(T+273.15)*log((T+273.15)/ 337.61 )
GCA_002909415SCO5184.pdbA:Delta G(T) = 45.2 *(1-(T+273.15)/ 338.18 )+ -1.3 *( 65 -T)+ -1.3 *(T+273.15)*log((T+273.15)/ 338.18 )
GCA_002929215SCO5184.pdbA:Delta G(T) = 110.6 *(1-(T+273.15)/ 339.86 )+ -3.09 *( 66.7 -T)+ -3.09 *(T+273.15)*log((T+273.15)/ 339.86 )
GCA_002929255SCO5184.pdbA:Delta G(T) = 37.2 *(1-(T+273.15)/ 341.19 )+ -1.02 *( 68 -T)+ -1.02 *(T+273.15)*log((T+273.15)/ 341.19 )
GCA_002929275SCO5184.pdbA:Delta G(T) = 37.2 *(1-(T+273.15)/ 341.19 )+ -1.02 *( 68 -T)+ -1.02 *(T+273.15)*log((T+273.15)/ 341.19 )
GCA_002929295SCO5184.pdbA:Delta G(T) = 173.3 *(1-(T+273.15)/ 336.8 )+ -5.09 *( 63.6 -T)+ -5.09 *(T+273.15)*log((T+273.15)/ 336.8 )
GCA_002929305SCO5184.pdbA:Delta G(T) = 127.5 *(1-(T+273.15)/ 330.91 )+ -4.15 *( 57.8 -T)+ -4.15 *(T+273.15)*log((T+273.15)/ 330.91 )
GCA_002929335SCO5184.pdbA:Delta G(T) = -8.6 *(1-(T+273.15)/ 328.75 )+ 0.29 *( 55.6 -T)+ 0.29 *(T+273.15)*log((T+273.15)/ 328.75 )
GCA_002929355SCO5184.pdbA:Delta G(T) = 62.1 *(1-(T+273.15)/ 325.41 )+ -2.25 *( 52.3 -T)+ -2.25 *(T+273.15)*log((T+273.15)/ 325.41 )
GCA_002929375SCO5184.pdbA:Delta G(T) = 155.3 *(1-(T+273.15)/ 344.2 )+ -4.06 *( 71.1 -T)+ -4.06 *(T+273.15)*log((T+273.15)/ 344.2 )
GCA_002929385SCO5184.pdbA:Delta G(T) = 87.5 *(1-(T+273.15)/ 345.36 )+ -2.25 *( 72.2 -T)+ -2.25 *(T+273.15)*log((T+273.15)/ 345.36 )
GCA_002929455SCO5184.pdbA:Delta G(T) = 72.8 *(1-(T+273.15)/ 342.43 )+ -1.96 *( 69.3 -T)+ -1.96 *(T+273.15)*log((T+273.15)/ 342.43 )
GCA_002929705SCO5184.pdbA:Delta G(T) = 127.7 *(1-(T+273.15)/ 350.8 )+ -3.04 *( 77.6 -T)+ -3.04 *(T+273.15)*log((T+273.15)/ 350.8 )
GCA_002929745SCO5184.pdbA:Delta G(T) = 78.6 *(1-(T+273.15)/ 333.91 )+ -2.43 *( 60.8 -T)+ -2.43 *(T+273.15)*log((T+273.15)/ 333.91 )
GCA_002929755SCO5184.pdbA:Delta G(T) = 2.8 *(1-(T+273.15)/ 335.92 )+ -0.08 *( 62.8 -T)+ -0.08 *(T+273.15)*log((T+273.15)/ 335.92 )
GCA_002934405SCO5184.pdbA:Delta G(T) = 24.7 *(1-(T+273.15)/ 328.5 )+ -0.84 *( 55.4 -T)+ -0.84 *(T+273.15)*log((T+273.15)/ 328.5 )
GCA_002953935SCO5184.pdbA:Delta G(T) = 59.6 *(1-(T+273.15)/ 340.01 )+ -1.66 *( 66.9 -T)+ -1.66 *(T+273.15)*log((T+273.15)/ 340.01 )
GCA_002954225SCO5184.pdbA:Delta G(T) = 113.6 *(1-(T+273.15)/ 332.35 )+ -3.6 *( 59.2 -T)+ -3.6 *(T+273.15)*log((T+273.15)/ 332.35 )
GCA_003097355SCO5184.pdbA:Delta G(T) = 95.1 *(1-(T+273.15)/ 329.09 )+ -3.2 *( 55.9 -T)+ -3.2 *(T+273.15)*log((T+273.15)/ 329.09 )
GCA_003116525SCO5184.pdbA:Delta G(T) = 33.5 *(1-(T+273.15)/ 336.91 )+ -0.98 *( 63.8 -T)+ -0.98 *(T+273.15)*log((T+273.15)/ 336.91 )
GCA_003185915SCO5184.pdbA:Delta G(T) = 50.2 *(1-(T+273.15)/ 340.55 )+ -1.39 *( 67.4 -T)+ -1.39 *(T+273.15)*log((T+273.15)/ 340.55 )
GCA_003208335SCO5184.pdbA:Delta G(T) = 115 *(1-(T+273.15)/ 337.14 )+ -3.36 *( 64 -T)+ -3.36 *(T+273.15)*log((T+273.15)/ 337.14 )
GCA_003219795SCO5184.pdbA:Delta G(T) = 68.7 *(1-(T+273.15)/ 335.65 )+ -2.06 *( 62.5 -T)+ -2.06 *(T+273.15)*log((T+273.15)/ 335.65 )
GCA_003219815SCO5184.pdbA:Delta G(T) = 96.1 *(1-(T+273.15)/ 336.79 )+ -2.82 *( 63.6 -T)+ -2.82 *(T+273.15)*log((T+273.15)/ 336.79 )
GCA_003268655SCO5184.pdbA:Delta G(T) = 1.2 *(1-(T+273.15)/ 328.23 )+ -0.04 *( 55.1 -T)+ -0.04 *(T+273.15)*log((T+273.15)/ 328.23 )
GCA_003287955SCO5184.pdbA:Delta G(T) = 54.2 *(1-(T+273.15)/ 339.99 )+ -1.51 *( 66.8 -T)+ -1.51 *(T+273.15)*log((T+273.15)/ 339.99 )
GCA_900016675SCO5184.pdbA:Delta G(T) = 40.9 *(1-(T+273.15)/ 349.14 )+ -0.99 *( 76 -T)+ -0.99 *(T+273.15)*log((T+273.15)/ 349.14 )
GCA_900099735SCO5184.pdbA:Delta G(T) = 170 *(1-(T+273.15)/ 355.99 )+ -3.77 *( 82.8 -T)+ -3.77 *(T+273.15)*log((T+273.15)/ 355.99 )
GCA_900099975SCO5184.pdbA:Delta G(T) = 13.7 *(1-(T+273.15)/ 321.56 )+ -0.54 *( 48.4 -T)+ -0.54 *(T+273.15)*log((T+273.15)/ 321.56 )
GCA_900102785SCO5184.pdbA:Delta G(T) = 53.2 *(1-(T+273.15)/ 335.63 )+ -1.59 *( 62.5 -T)+ -1.59 *(T+273.15)*log((T+273.15)/ 335.63 )
GCA_900102805SCO5184.pdbA:Delta G(T) = 121.9 *(1-(T+273.15)/ 350.37 )+ -2.92 *( 77.2 -T)+ -2.92 *(T+273.15)*log((T+273.15)/ 350.37 )
GCA_900102895SCO5184.pdbA:Delta G(T) = 86.9 *(1-(T+273.15)/ 329.69 )+ -2.89 *( 56.5 -T)+ -2.89 *(T+273.15)*log((T+273.15)/ 329.69 )
GCA_900104405SCO5184.pdbA:Delta G(T) = 132.9 *(1-(T+273.15)/ 337.59 )+ -3.85 *( 64.4 -T)+ -3.85 *(T+273.15)*log((T+273.15)/ 337.59 )
GCA_900105345SCO5184.pdbA:Delta G(T) = 55.2 *(1-(T+273.15)/ 325.74 )+ -1.98 *( 52.6 -T)+ -1.98 *(T+273.15)*log((T+273.15)/ 325.74 )
GCA_900105535SCO5184.pdbA:Delta G(T) = -16.1 *(1-(T+273.15)/ 339.3 )+ 0.45 *( 66.2 -T)+ 0.45 *(T+273.15)*log((T+273.15)/ 339.3 )
GCA_900105965SCO5184.pdbA:Delta G(T) = 54.6 *(1-(T+273.15)/ 338.43 )+ -1.56 *( 65.3 -T)+ -1.56 *(T+273.15)*log((T+273.15)/ 338.43 )
GCA_900106835SCO5184.pdbA:Delta G(T) = 105.5 *(1-(T+273.15)/ 343.97 )+ -2.77 *( 70.8 -T)+ -2.77 *(T+273.15)*log((T+273.15)/ 343.97 )
GCA_900110595SCO5184.pdbA:Delta G(T) = 29.9 *(1-(T+273.15)/ 339.49 )+ -0.84 *( 66.3 -T)+ -0.84 *(T+273.15)*log((T+273.15)/ 339.49 )
GCA_900116495SCO5184.pdbA:Delta G(T) = 88.9 *(1-(T+273.15)/ 330.07 )+ -2.94 *( 56.9 -T)+ -2.94 *(T+273.15)*log((T+273.15)/ 330.07 )
GCA_900168135SCO5184.pdbA:Delta G(T) = 113.8 *(1-(T+273.15)/ 334.98 )+ -3.45 *( 61.8 -T)+ -3.45 *(T+273.15)*log((T+273.15)/ 334.98 )
GCA_900168225SCO5184.pdbA:Delta G(T) = 103 *(1-(T+273.15)/ 339.21 )+ -2.91 *( 66.1 -T)+ -2.91 *(T+273.15)*log((T+273.15)/ 339.21 )
GCA_000014925SCO5184.pdbA:Delta G(T) = 91.4 *(1-(T+273.15)/ 338.69 )+ -2.6 *( 65.5 -T)+ -2.6 *(T+273.15)*log((T+273.15)/ 338.69 )
GCA_000022025SCO5184.pdbA:Delta G(T) = -0.2 *(1-(T+273.15)/ 340.41 )+ 0.01 *( 67.3 -T)+ 0.01 *(T+273.15)*log((T+273.15)/ 340.41 )
GCA_000189535SCO5184.pdbA:Delta G(T) = 13.6 *(1-(T+273.15)/ 336.59 )+ -0.4 *( 63.4 -T)+ -0.4 *(T+273.15)*log((T+273.15)/ 336.59 )
GCA_000196235SCO5184.pdbA:Delta G(T) = 106.6 *(1-(T+273.15)/ 330.38 )+ -3.5 *( 57.2 -T)+ -3.5 *(T+273.15)*log((T+273.15)/ 330.38 )
GCA_000238915SCO5184.pdbA:Delta G(T) = -9.6 *(1-(T+273.15)/ 331.12 )+ 0.31 *( 58 -T)+ 0.31 *(T+273.15)*log((T+273.15)/ 331.12 )
GCA_000281065SCO5184.pdbA:Delta G(T) = 37.5 *(1-(T+273.15)/ 342.43 )+ -1.01 *( 69.3 -T)+ -1.01 *(T+273.15)*log((T+273.15)/ 342.43 )
GCA_000294595SCO5184.pdbA:Delta G(T) = 104.9 *(1-(T+273.15)/ 346.15 )+ -2.66 *( 73 -T)+ -2.66 *(T+273.15)*log((T+273.15)/ 346.15 )
GCA_000294695SCO5184.pdbA:Delta G(T) = 47.8 *(1-(T+273.15)/ 340.79 )+ -1.32 *( 67.6 -T)+ -1.32 *(T+273.15)*log((T+273.15)/ 340.79 )
GCA_000332815SCO5184.pdbA:Delta G(T) = -37.3 *(1-(T+273.15)/ 334.31 )+ 1.14 *( 61.2 -T)+ 1.14 *(T+273.15)*log((T+273.15)/ 334.31 )
GCA_000374905SCO5184.pdbA:Delta G(T) = 23 *(1-(T+273.15)/ 337.5 )+ -0.67 *( 64.3 -T)+ -0.67 *(T+273.15)*log((T+273.15)/ 337.5 )
GCA_000374925SCO5184.pdbA:Delta G(T) = -280.4 *(1-(T+273.15)/ 360.7 )+ 1.6 *( 87.6 -T)+ 1.6 *(T+273.15)*log((T+273.15)/ 360.7 )
GCA_000014925.faa_TPS1.pdbA:Delta G(T) = -129.8 *(1-(T+273.15)/ 342.98 )+ 3.46 *( 69.8 -T)+ 3.46 *(T+273.15)*log((T+273.15)/ 342.98 )
GCA_000022025.faa_TPS1.pdbA:Delta G(T) = -92.3 *(1-(T+273.15)/ 343.08 )+ 2.45 *( 69.9 -T)+ 2.45 *(T+273.15)*log((T+273.15)/ 343.08 )
GCA_000189535.faa_TPS1.pdbA:Delta G(T) = -105.3 *(1-(T+273.15)/ 341.71 )+ 2.86 *( 68.6 -T)+ 2.86 *(T+273.15)*log((T+273.15)/ 341.71 )
GCA_000196235.faa_TPS1.pdbA:Delta G(T) = -90.9 *(1-(T+273.15)/ 341.93 )+ 2.46 *( 68.8 -T)+ 2.46 *(T+273.15)*log((T+273.15)/ 341.93 )
GCA_000238915.faa_TPS1.pdbA:Delta G(T) = -133.9 *(1-(T+273.15)/ 341.36 )+ 3.65 *( 68.2 -T)+ 3.65 *(T+273.15)*log((T+273.15)/ 341.36 )
GCA_000281065.faa_TPS1.pdbA:Delta G(T) = -123.8 *(1-(T+273.15)/ 345.51 )+ 3.17 *( 72.4 -T)+ 3.17 *(T+273.15)*log((T+273.15)/ 345.51 )
GCA_000294595.faa_TPS1.pdbA:Delta G(T) = -133.3 *(1-(T+273.15)/ 340.31 )+ 3.7 *( 67.2 -T)+ 3.7 *(T+273.15)*log((T+273.15)/ 340.31 )
GCA_000294695.faa_TPS1.pdbA:Delta G(T) = -129.8 *(1-(T+273.15)/ 342.98 )+ 3.46 *( 69.8 -T)+ 3.46 *(T+273.15)*log((T+273.15)/ 342.98 )
GCA_000332815.faa_TPS1.pdbA:Delta G(T) = -125.8 *(1-(T+273.15)/ 338.06 )+ 2.43 *( 64.9 -T)+ 2.43 *(T+273.15)*log((T+273.15)/ 338.06 )
GCA_000374865.faa_TPS1.pdbA:Delta G(T) = -128.7 *(1-(T+273.15)/ 340 )+ 3.51 *( 66.9 -T)+ 3.51 *(T+273.15)*log((T+273.15)/ 340 )
GCA_000374905.faa_TPS1.pdbA:Delta G(T) = -108.2 *(1-(T+273.15)/ 340.7 )+ 2.98 *( 67.6 -T)+ 2.98 *(T+273.15)*log((T+273.15)/ 340.7 )
GCA_000374925.faa_TPS1.pdbA:Delta G(T) = -113.7 *(1-(T+273.15)/ 341.75 )+ 3.08 *( 68.6 -T)+ 3.08 *(T+273.15)*log((T+273.15)/ 341.75 )
GCA_000374945.faa_TPS1.pdbA:Delta G(T) = -98 *(1-(T+273.15)/ 341.65 )+ 2.66 *( 68.5 -T)+ 2.66 *(T+273.15)*log((T+273.15)/ 341.65 )
GCA_000468215.faa_TPS1.pdbA:Delta G(T) = -133.3 *(1-(T+273.15)/ 340.31 )+ 3.7 *( 67.2 -T)+ 3.7 *(T+273.15)*log((T+273.15)/ 340.31 )
GCA_000482545.faa_TPS1.pdbA:Delta G(T) = -113.1 *(1-(T+273.15)/ 338.19 )+ 3.25 *( 65 -T)+ 3.25 *(T+273.15)*log((T+273.15)/ 338.19 )
GCA_000514015.faa_TPS1.pdbA:Delta G(T) = -113.2 *(1-(T+273.15)/ 340.01 )+ 3.16 *( 66.9 -T)+ 3.16 *(T+273.15)*log((T+273.15)/ 340.01 )
GCA_000514155.faa_TPS1.pdbA:Delta G(T) = -113.2 *(1-(T+273.15)/ 340.01 )+ 3.16 *( 66.9 -T)+ 3.16 *(T+273.15)*log((T+273.15)/ 340.01 )
GCA_000517125.faa_TPS1.pdbA:Delta G(T) = -111.4 *(1-(T+273.15)/ 345.76 )+ 2.85 *( 72.6 -T)+ 2.85 *(T+273.15)*log((T+273.15)/ 345.76 )
GCA_000520555.faa_TPS1.pdbA:Delta G(T) = -130.7 *(1-(T+273.15)/ 344.02 )+ 3.26 *( 70.9 -T)+ 3.26 *(T+273.15)*log((T+273.15)/ 344.02 )
GCA_000520575.faa_TPS1.pdbA:Delta G(T) = -130.7 *(1-(T+273.15)/ 344.02 )+ 3.26 *( 70.9 -T)+ 3.26 *(T+273.15)*log((T+273.15)/ 344.02 )
GCA_000520595.faa_TPS1.pdbA:Delta G(T) = -141.1 *(1-(T+273.15)/ 338.73 )+ 3.96 *( 65.6 -T)+ 3.96 *(T+273.15)*log((T+273.15)/ 338.73 )
GCA_000620385.faa_TPS1.pdbA:Delta G(T) = -113.7 *(1-(T+273.15)/ 341.75 )+ 3.08 *( 68.6 -T)+ 3.08 *(T+273.15)*log((T+273.15)/ 341.75 )
GCA_000685965.faa_TPS1.pdbA:Delta G(T) = -109.5 *(1-(T+273.15)/ 343.5 )+ 2.89 *( 70.3 -T)+ 2.89 *(T+273.15)*log((T+273.15)/ 343.5 )
GCA_000755585.faa_TPS1.pdbA:Delta G(T) = -134.9 *(1-(T+273.15)/ 341.79 )+ 3.28 *( 68.6 -T)+ 3.28 *(T+273.15)*log((T+273.15)/ 341.79 )
GCA_000785535.faa_TPS1.pdbA:Delta G(T) = -125.2 *(1-(T+273.15)/ 341.03 )+ 3.44 *( 67.9 -T)+ 3.44 *(T+273.15)*log((T+273.15)/ 341.03 )
GCA_000813845.faa_TPS1.pdbA:Delta G(T) = -124.1 *(1-(T+273.15)/ 341.02 )+ 3.41 *( 67.9 -T)+ 3.41 *(T+273.15)*log((T+273.15)/ 341.02 )
GCA_000816565.faa_TPS1.pdbA:Delta G(T) = -143.6 *(1-(T+273.15)/ 342.21 )+ 3.86 *( 69.1 -T)+ 3.86 *(T+273.15)*log((T+273.15)/ 342.21 )
GCA_000876655.faa_TPS1.pdbA:Delta G(T) = -115.9 *(1-(T+273.15)/ 345.15 )+ 2.99 *( 72 -T)+ 2.99 *(T+273.15)*log((T+273.15)/ 345.15 )
GCA_000962805.faa_TPS1.pdbA:Delta G(T) = -97.1 *(1-(T+273.15)/ 343.45 )+ 2.57 *( 70.3 -T)+ 2.57 *(T+273.15)*log((T+273.15)/ 343.45 )
GCA_001046895.faa_TPS1.pdbA:Delta G(T) = -104.7 *(1-(T+273.15)/ 339.84 )+ 2.93 *( 66.7 -T)+ 2.93 *(T+273.15)*log((T+273.15)/ 339.84 )
GCA_001187915.faa_TPS1.pdbA:Delta G(T) = -132.4 *(1-(T+273.15)/ 340.81 )+ 3.65 *( 67.7 -T)+ 3.65 *(T+273.15)*log((T+273.15)/ 340.81 )
GCA_001238605.faa_TPS1.pdbA:Delta G(T) = -109.4 *(1-(T+273.15)/ 339.33 )+ 3.08 *( 66.2 -T)+ 3.08 *(T+273.15)*log((T+273.15)/ 339.33 )
GCA_001281315.faa_TPS1.pdbA:Delta G(T) = -135.6 *(1-(T+273.15)/ 345.71 )+ 3.47 *( 72.6 -T)+ 3.47 *(T+273.15)*log((T+273.15)/ 345.71 )
GCA_001294625.faa_TPS1.pdbA:Delta G(T) = -121.3 *(1-(T+273.15)/ 340.5 )+ 3.36 *( 67.3 -T)+ 3.36 *(T+273.15)*log((T+273.15)/ 340.5 )
GCA_001307035.faa_TPS1.pdbA:Delta G(T) = -112.8 *(1-(T+273.15)/ 336.42 )+ 3.17 *( 63.3 -T)+ 3.17 *(T+273.15)*log((T+273.15)/ 336.42 )
GCA_001373495.faa_TPS1.pdbA:Delta G(T) = -108.2 *(1-(T+273.15)/ 337.93 )+ 3.12 *( 64.8 -T)+ 3.12 *(T+273.15)*log((T+273.15)/ 337.93 )
GCA_001422645.faa_TPS1.pdbA:Delta G(T) = -101.4 *(1-(T+273.15)/ 339.33 )+ 2.86 *( 66.2 -T)+ 2.86 *(T+273.15)*log((T+273.15)/ 339.33 )
GCA_001422665.faa_TPS1.pdbA:Delta G(T) = -115.3 *(1-(T+273.15)/ 341.16 )+ 3.16 *( 68 -T)+ 3.16 *(T+273.15)*log((T+273.15)/ 341.16 )
GCA_001423525.faa_TPS1.pdbA:Delta G(T) = -105.3 *(1-(T+273.15)/ 343.74 )+ 2.77 *( 70.6 -T)+ 2.77 *(T+273.15)*log((T+273.15)/ 343.74 )
GCA_001423745.faa_TPS1.pdbA:Delta G(T) = -92.4 *(1-(T+273.15)/ 344.1 )+ 2.42 *( 71 -T)+ 2.42 *(T+273.15)*log((T+273.15)/ 344.1 )
GCA_001424565.faa_TPS1.pdbA:Delta G(T) = -109.4 *(1-(T+273.15)/ 339.33 )+ 3.08 *( 66.2 -T)+ 3.08 *(T+273.15)*log((T+273.15)/ 339.33 )
GCA_001428005.faa_TPS1.pdbA:Delta G(T) = -123.3 *(1-(T+273.15)/ 341.1 )+ 3.38 *( 68 -T)+ 3.38 *(T+273.15)*log((T+273.15)/ 341.1 )
GCA_001428075.faa_TPS1.pdbA:Delta G(T) = -120.7 *(1-(T+273.15)/ 343.55 )+ 3.19 *( 70.4 -T)+ 3.19 *(T+273.15)*log((T+273.15)/ 343.55 )
GCA_001428325.faa_TPS1.pdbA:Delta G(T) = -108.2 *(1-(T+273.15)/ 340.7 )+ 2.98 *( 67.6 -T)+ 2.98 *(T+273.15)*log((T+273.15)/ 340.7 )
GCA_001428335.faa_TPS1.pdbA:Delta G(T) = -101.2 *(1-(T+273.15)/ 343.65 )+ 2.67 *( 70.5 -T)+ 2.67 *(T+273.15)*log((T+273.15)/ 343.65 )
GCA_001428365.faa_TPS1.pdbA:Delta G(T) = -107.4 *(1-(T+273.15)/ 342.02 )+ 2.9 *( 68.9 -T)+ 2.9 *(T+273.15)*log((T+273.15)/ 342.02 )
GCA_001428435.faa_TPS1.pdbA:Delta G(T) = -149.5 *(1-(T+273.15)/ 343.75 )+ 3.93 *( 70.6 -T)+ 3.93 *(T+273.15)*log((T+273.15)/ 343.75 )
GCA_001445575.faa_TPS1.pdbA:Delta G(T) = -110 *(1-(T+273.15)/ 342.53 )+ 2.95 *( 69.4 -T)+ 2.95 *(T+273.15)*log((T+273.15)/ 342.53 )
GCA_001457025.faa_TPS1.pdbA:Delta G(T) = -106.5 *(1-(T+273.15)/ 340.2 )+ 2.96 *( 67.1 -T)+ 2.96 *(T+273.15)*log((T+273.15)/ 340.2 )
GCA_001512285.faa_TPS1.pdbA:Delta G(T) = -94.5 *(1-(T+273.15)/ 339.79 )+ 2.64 *( 66.6 -T)+ 2.64 *(T+273.15)*log((T+273.15)/ 339.79 )
GCA_001512305.faa_TPS1.pdbA:Delta G(T) = -111.8 *(1-(T+273.15)/ 342.91 )+ 2.98 *( 69.8 -T)+ 2.98 *(T+273.15)*log((T+273.15)/ 342.91 )
GCA_001542565.faa_TPS1.pdbA:Delta G(T) = -139.2 *(1-(T+273.15)/ 343.73 )+ 3.66 *( 70.6 -T)+ 3.66 *(T+273.15)*log((T+273.15)/ 343.73 )
GCA_001552075.faa_TPS1.pdbA:Delta G(T) = -114.8 *(1-(T+273.15)/ 338.55 )+ 3.28 *( 65.4 -T)+ 3.28 *(T+273.15)*log((T+273.15)/ 338.55 )
GCA_001641125.faa_TPS1.pdbA:Delta G(T) = -124.5 *(1-(T+273.15)/ 342.75 )+ 3.33 *( 69.6 -T)+ 3.33 *(T+273.15)*log((T+273.15)/ 342.75 )
GCA_001663775.faa_TPS1.pdbA:Delta G(T) = -92.5 *(1-(T+273.15)/ 344.13 )+ 2.42 *( 71 -T)+ 2.42 *(T+273.15)*log((T+273.15)/ 344.13 )
GCA_001766675.faa_TPS1.pdbA:Delta G(T) = -110.7 *(1-(T+273.15)/ 341.78 )+ 3 *( 68.6 -T)+ 3 *(T+273.15)*log((T+273.15)/ 341.78 )
GCA_001854365.faa_TPS1.pdbA:Delta G(T) = -139.2 *(1-(T+273.15)/ 343.73 )+ 3.66 *( 70.6 -T)+ 3.66 *(T+273.15)*log((T+273.15)/ 343.73 )
GCA_001969265.faa_TPS1.pdbA:Delta G(T) = -126.8 *(1-(T+273.15)/ 342.33 )+ 3.41 *( 69.2 -T)+ 3.41 *(T+273.15)*log((T+273.15)/ 342.33 )
GCA_002008315.faa_TPS1.pdbA:Delta G(T) = -91.8 *(1-(T+273.15)/ 341.37 )+ 2.51 *( 68.2 -T)+ 2.51 *(T+273.15)*log((T+273.15)/ 341.37 )
GCA_002157505.faa_TPS1.pdbA:Delta G(T) = -131.4 *(1-(T+273.15)/ 341.6 )+ 3.57 *( 68.4 -T)+ 3.57 *(T+273.15)*log((T+273.15)/ 341.6 )
GCA_002157565.faa_TPS1.pdbA:Delta G(T) = -129.6 *(1-(T+273.15)/ 341.07 )+ 3.55 *( 67.9 -T)+ 3.55 *(T+273.15)*log((T+273.15)/ 341.07 )
GCA_002224285.faa_TPS1.pdbA:Delta G(T) = -107.8 *(1-(T+273.15)/ 339.08 )+ 3.05 *( 65.9 -T)+ 3.05 *(T+273.15)*log((T+273.15)/ 339.08 )
GCA_002849715.faa_TPS1.pdbA:Delta G(T) = -103.1 *(1-(T+273.15)/ 337.6 )+ 2.99 *( 64.4 -T)+ 2.99 *(T+273.15)*log((T+273.15)/ 337.6 )
GCA_002892795.faa_TPS1.pdbA:Delta G(T) = -126.8 *(1-(T+273.15)/ 342.5 )+ 3.4 *( 69.4 -T)+ 3.4 *(T+273.15)*log((T+273.15)/ 342.5 )
GCA_002892835.faa_TPS1.pdbA:Delta G(T) = -127.7 *(1-(T+273.15)/ 341.23 )+ 3.49 *( 68.1 -T)+ 3.49 *(T+273.15)*log((T+273.15)/ 341.23 )
GCA_002909415.faa_TPS1.pdbA:Delta G(T) = -114.2 *(1-(T+273.15)/ 339.09 )+ 3.23 *( 65.9 -T)+ 3.23 *(T+273.15)*log((T+273.15)/ 339.09 )
GCA_002929215.faa_TPS1.pdbA:Delta G(T) = -131.5 *(1-(T+273.15)/ 339.97 )+ 3.67 *( 66.8 -T)+ 3.67 *(T+273.15)*log((T+273.15)/ 339.97 )
GCA_002929255.faa_TPS1.pdbA:Delta G(T) = -115 *(1-(T+273.15)/ 339.65 )+ 3.22 *( 66.5 -T)+ 3.22 *(T+273.15)*log((T+273.15)/ 339.65 )
GCA_002929275.faa_TPS1.pdbA:Delta G(T) = -115 *(1-(T+273.15)/ 339.65 )+ 3.22 *( 66.5 -T)+ 3.22 *(T+273.15)*log((T+273.15)/ 339.65 )
GCA_002929295.faa_TPS1.pdbA:Delta G(T) = -132.7 *(1-(T+273.15)/ 340.93 )+ 3.55 *( 67.8 -T)+ 3.55 *(T+273.15)*log((T+273.15)/ 340.93 )
GCA_002929305.faa_TPS1.pdbA:Delta G(T) = -114.8 *(1-(T+273.15)/ 337.66 )+ 2.8 *( 64.5 -T)+ 2.8 *(T+273.15)*log((T+273.15)/ 337.66 )
GCA_002929335.faa_TPS1.pdbA:Delta G(T) = -110.2 *(1-(T+273.15)/ 342.24 )+ 2.97 *( 69.1 -T)+ 2.97 *(T+273.15)*log((T+273.15)/ 342.24 )
GCA_002929355.faa_TPS1.pdbA:Delta G(T) = -126.8 *(1-(T+273.15)/ 344.43 )+ 3.3 *( 71.3 -T)+ 3.3 *(T+273.15)*log((T+273.15)/ 344.43 )
GCA_002929375.faa_TPS1.pdbA:Delta G(T) = -107.9 *(1-(T+273.15)/ 336.56 )+ 3.18 *( 63.4 -T)+ 3.18 *(T+273.15)*log((T+273.15)/ 336.56 )
GCA_002929385.faa_TPS1.pdbA:Delta G(T) = -115 *(1-(T+273.15)/ 339.65 )+ 3.22 *( 66.5 -T)+ 3.22 *(T+273.15)*log((T+273.15)/ 339.65 )
GCA_002929455.faa_TPS1.pdbA:Delta G(T) = -115 *(1-(T+273.15)/ 339.65 )+ 3.22 *( 66.5 -T)+ 3.22 *(T+273.15)*log((T+273.15)/ 339.65 )
GCA_002929705.faa_TPS1.pdbA:Delta G(T) = -110.3 *(1-(T+273.15)/ 343 )+ 2.94 *( 69.9 -T)+ 2.94 *(T+273.15)*log((T+273.15)/ 343 )
GCA_002929745.faa_TPS1.pdbA:Delta G(T) = -140.7 *(1-(T+273.15)/ 339.5 )+ 3.77 *( 66.3 -T)+ 3.77 *(T+273.15)*log((T+273.15)/ 339.5 )
GCA_002929755.faa_TPS1.pdbA:Delta G(T) = -110.5 *(1-(T+273.15)/ 340.57 )+ 3.05 *( 67.4 -T)+ 3.05 *(T+273.15)*log((T+273.15)/ 340.57 )
GCA_002934405.faa_TPS1.pdbA:Delta G(T) = -97 *(1-(T+273.15)/ 343.02 )+ 2.58 *( 69.9 -T)+ 2.58 *(T+273.15)*log((T+273.15)/ 343.02 )
GCA_002953935.faa_TPS1.pdbA:Delta G(T) = -121.1 *(1-(T+273.15)/ 338.08 )+ 3.48 *( 64.9 -T)+ 3.48 *(T+273.15)*log((T+273.15)/ 338.08 )
GCA_002954225.faa_TPS1.pdbA:Delta G(T) = -132 *(1-(T+273.15)/ 339.42 )+ 3.7 *( 66.3 -T)+ 3.7 *(T+273.15)*log((T+273.15)/ 339.42 )
GCA_003097355.faa_TPS1.pdbA:Delta G(T) = -119.5 *(1-(T+273.15)/ 344.75 )+ 3.1 *( 71.6 -T)+ 3.1 *(T+273.15)*log((T+273.15)/ 344.75 )
GCA_003116525.faa_TPS1.pdbA:Delta G(T) = -128.7 *(1-(T+273.15)/ 340 )+ 3.51 *( 66.9 -T)+ 3.51 *(T+273.15)*log((T+273.15)/ 340 )
GCA_003185915.faa_TPS1.pdbA:Delta G(T) = -123.1 *(1-(T+273.15)/ 341.17 )+ 3.37 *( 68 -T)+ 3.37 *(T+273.15)*log((T+273.15)/ 341.17 )
GCA_003208335.faa_TPS1.pdbA:Delta G(T) = -96.9 *(1-(T+273.15)/ 341.89 )+ 2.62 *( 68.7 -T)+ 2.62 *(T+273.15)*log((T+273.15)/ 341.89 )
GCA_003219795.faa_TPS1.pdbA:Delta G(T) = -126.6 *(1-(T+273.15)/ 342.28 )+ 3.41 *( 69.1 -T)+ 3.41 *(T+273.15)*log((T+273.15)/ 342.28 )
GCA_003219815.faa_TPS1.pdbA:Delta G(T) = -100.3 *(1-(T+273.15)/ 336.4 )+ 2.97 *( 63.3 -T)+ 2.97 *(T+273.15)*log((T+273.15)/ 336.4 )
GCA_003268655.faa_TPS1.pdbA:Delta G(T) = -130.9 *(1-(T+273.15)/ 339.59 )+ 3.63 *( 66.4 -T)+ 3.63 *(T+273.15)*log((T+273.15)/ 339.59 )
GCA_003287955.faa_TPS1.pdbA:Delta G(T) = -123 *(1-(T+273.15)/ 339.17 )+ 3.48 *( 66 -T)+ 3.48 *(T+273.15)*log((T+273.15)/ 339.17 )
GCA_900016675.faa_TPS1.pdbA:Delta G(T) = -112.6 *(1-(T+273.15)/ 346.03 )+ 2.86 *( 72.9 -T)+ 2.86 *(T+273.15)*log((T+273.15)/ 346.03 )
GCA_900099735.faa_TPS1.pdbA:Delta G(T) = -148 *(1-(T+273.15)/ 342.49 )+ 3.97 *( 69.3 -T)+ 3.97 *(T+273.15)*log((T+273.15)/ 342.49 )
GCA_900099975.faa_TPS1.pdbA:Delta G(T) = -76.4 *(1-(T+273.15)/ 342.23 )+ 2.06 *( 69.1 -T)+ 2.06 *(T+273.15)*log((T+273.15)/ 342.23 )
GCA_900102785.faa_TPS1.pdbA:Delta G(T) = -105.7 *(1-(T+273.15)/ 343.29 )+ 2.8 *( 70.1 -T)+ 2.8 *(T+273.15)*log((T+273.15)/ 343.29 )
GCA_900102805.faa_TPS1.pdbA:Delta G(T) = -113.2 *(1-(T+273.15)/ 340.01 )+ 3.16 *( 66.9 -T)+ 3.16 *(T+273.15)*log((T+273.15)/ 340.01 )
GCA_900102895.faa_TPS1.pdbA:Delta G(T) = -112.4 *(1-(T+273.15)/ 343.49 )+ 2.97 *( 70.3 -T)+ 2.97 *(T+273.15)*log((T+273.15)/ 343.49 )
GCA_900104405.faa_TPS1.pdbA:Delta G(T) = -98.8 *(1-(T+273.15)/ 342.15 )+ 2.67 *( 69 -T)+ 2.67 *(T+273.15)*log((T+273.15)/ 342.15 )
GCA_900105345.faa_TPS1.pdbA:Delta G(T) = -101.5 *(1-(T+273.15)/ 346.93 )+ 2.55 *( 73.8 -T)+ 2.55 *(T+273.15)*log((T+273.15)/ 346.93 )
GCA_900105535.faa_TPS1.pdbA:Delta G(T) = -103.5 *(1-(T+273.15)/ 343.24 )+ 2.74 *( 70.1 -T)+ 2.74 *(T+273.15)*log((T+273.15)/ 343.24 )
GCA_900105965.faa_TPS1.pdbA:Delta G(T) = -132 *(1-(T+273.15)/ 342.78 )+ 3.24 *( 69.6 -T)+ 3.24 *(T+273.15)*log((T+273.15)/ 342.78 )
GCA_900106835.faa_TPS1.pdbA:Delta G(T) = -100.3 *(1-(T+273.15)/ 339.55 )+ 2.82 *( 66.4 -T)+ 2.82 *(T+273.15)*log((T+273.15)/ 339.55 )
GCA_900110595.faa_TPS1.pdbA:Delta G(T) = -133.9 *(1-(T+273.15)/ 341.08 )+ 3.67 *( 67.9 -T)+ 3.67 *(T+273.15)*log((T+273.15)/ 341.08 )
GCA_900116495.faa_TPS1.pdbA:Delta G(T) = -100.9 *(1-(T+273.15)/ 341.42 )+ 2.75 *( 68.3 -T)+ 2.75 *(T+273.15)*log((T+273.15)/ 341.42 )
GCA_900168135.faa_TPS1.pdbA:Delta G(T) = -110.4 *(1-(T+273.15)/ 344.18 )+ 2.89 *( 71 -T)+ 2.89 *(T+273.15)*log((T+273.15)/ 344.18 )
GCA_900168225.faa_TPS1.pdbA:Delta G(T) = -104.1 *(1-(T+273.15)/ 342.23 )+ 2.8 *( 69.1 -T)+ 2.8 *(T+273.15)*log((T+273.15)/ 342.23 )
GCA_000374945acpS.pdbA:Delta G(T) = -102.8 *(1-(T+273.15)/ 337.1 )+ 1.51 *( 64 -T)+ 1.51 *(T+273.15)*log((T+273.15)/ 337.1 )
GCA_000468215acpS.pdbA:Delta G(T) = -103.1 *(1-(T+273.15)/ 332.42 )+ 1.77 *( 59.3 -T)+ 1.77 *(T+273.15)*log((T+273.15)/ 332.42 )
GCA_000482545acpS.pdbA:Delta G(T) = -103.5 *(1-(T+273.15)/ 335.94 )+ 1.62 *( 62.8 -T)+ 1.62 *(T+273.15)*log((T+273.15)/ 335.94 )
GCA_000514015acpS.pdbA:Delta G(T) = -102.5 *(1-(T+273.15)/ 336.9 )+ 1.51 *( 63.7 -T)+ 1.51 *(T+273.15)*log((T+273.15)/ 336.9 )
GCA_000514155acpS.pdbA:Delta G(T) = -102.5 *(1-(T+273.15)/ 336.9 )+ 1.51 *( 63.7 -T)+ 1.51 *(T+273.15)*log((T+273.15)/ 336.9 )
GCA_000517125acpS.pdbA:Delta G(T) = -104.5 *(1-(T+273.15)/ 335.89 )+ 1.45 *( 62.7 -T)+ 1.45 *(T+273.15)*log((T+273.15)/ 335.89 )
GCA_000520555acpS.pdbA:Delta G(T) = -108 *(1-(T+273.15)/ 339.78 )+ 1.45 *( 66.6 -T)+ 1.45 *(T+273.15)*log((T+273.15)/ 339.78 )
GCA_000520575acpS.pdbA:Delta G(T) = -108 *(1-(T+273.15)/ 339.78 )+ 1.45 *( 66.6 -T)+ 1.45 *(T+273.15)*log((T+273.15)/ 339.78 )
GCA_000520595acpS.pdbA:Delta G(T) = -103.7 *(1-(T+273.15)/ 333.55 )+ 1.58 *( 60.4 -T)+ 1.58 *(T+273.15)*log((T+273.15)/ 333.55 )
GCA_000620385acpS.pdbA:Delta G(T) = -103.2 *(1-(T+273.15)/ 337.43 )+ 1.49 *( 64.3 -T)+ 1.49 *(T+273.15)*log((T+273.15)/ 337.43 )
GCA_000685965acpS.pdbA:Delta G(T) = -102.4 *(1-(T+273.15)/ 337.57 )+ 1.49 *( 64.4 -T)+ 1.49 *(T+273.15)*log((T+273.15)/ 337.57 )
GCA_000755585acpS.pdbA:Delta G(T) = -105.5 *(1-(T+273.15)/ 333.88 )+ 1.62 *( 60.7 -T)+ 1.62 *(T+273.15)*log((T+273.15)/ 333.88 )
GCA_000785535acpS.pdbA:Delta G(T) = -104.6 *(1-(T+273.15)/ 332.42 )+ 1.68 *( 59.3 -T)+ 1.68 *(T+273.15)*log((T+273.15)/ 332.42 )
GCA_000813845acpS.pdbA:Delta G(T) = -101.1 *(1-(T+273.15)/ 332.67 )+ 1.61 *( 59.5 -T)+ 1.61 *(T+273.15)*log((T+273.15)/ 332.67 )
GCA_000816565acpS.pdbA:Delta G(T) = -108.5 *(1-(T+273.15)/ 340.75 )+ 1.34 *( 67.6 -T)+ 1.34 *(T+273.15)*log((T+273.15)/ 340.75 )
GCA_000876655acpS.pdbA:Delta G(T) = -102.2 *(1-(T+273.15)/ 337.31 )+ 1.49 *( 64.2 -T)+ 1.49 *(T+273.15)*log((T+273.15)/ 337.31 )
GCA_000962805acpS.pdbA:Delta G(T) = -101.2 *(1-(T+273.15)/ 333.99 )+ 1.56 *( 60.8 -T)+ 1.56 *(T+273.15)*log((T+273.15)/ 333.99 )
GCA_001046895acpS.pdbA:Delta G(T) = -102.2 *(1-(T+273.15)/ 335.18 )+ 1.55 *( 62 -T)+ 1.55 *(T+273.15)*log((T+273.15)/ 335.18 )
GCA_001187915acpS.pdbA:Delta G(T) = -106.7 *(1-(T+273.15)/ 340.26 )+ 1.47 *( 67.1 -T)+ 1.47 *(T+273.15)*log((T+273.15)/ 340.26 )
GCA_001238605acpS.pdbA:Delta G(T) = -104.5 *(1-(T+273.15)/ 337.89 )+ 1.43 *( 64.7 -T)+ 1.43 *(T+273.15)*log((T+273.15)/ 337.89 )
GCA_001281315acpS.pdbA:Delta G(T) = -104.7 *(1-(T+273.15)/ 332.19 )+ 1.69 *( 59 -T)+ 1.69 *(T+273.15)*log((T+273.15)/ 332.19 )
GCA_001294625acpS.pdbA:Delta G(T) = -104.1 *(1-(T+273.15)/ 333.66 )+ 1.6 *( 60.5 -T)+ 1.6 *(T+273.15)*log((T+273.15)/ 333.66 )
GCA_001307035acpS.pdbA:Delta G(T) = -100.9 *(1-(T+273.15)/ 339.56 )+ 1.54 *( 66.4 -T)+ 1.54 *(T+273.15)*log((T+273.15)/ 339.56 )
GCA_001373495acpS.pdbA:Delta G(T) = -101.2 *(1-(T+273.15)/ 341.7 )+ 1.51 *( 68.5 -T)+ 1.51 *(T+273.15)*log((T+273.15)/ 341.7 )
GCA_001422645acpS.pdbA:Delta G(T) = -103.5 *(1-(T+273.15)/ 337.08 )+ 1.5 *( 63.9 -T)+ 1.5 *(T+273.15)*log((T+273.15)/ 337.08 )
GCA_001422665acpS.pdbA:Delta G(T) = -108.4 *(1-(T+273.15)/ 342.69 )+ 1.42 *( 69.5 -T)+ 1.42 *(T+273.15)*log((T+273.15)/ 342.69 )
GCA_001423525acpS.pdbA:Delta G(T) = -101.2 *(1-(T+273.15)/ 333.99 )+ 1.56 *( 60.8 -T)+ 1.56 *(T+273.15)*log((T+273.15)/ 333.99 )
GCA_001423745acpS.pdbA:Delta G(T) = -102.4 *(1-(T+273.15)/ 337.57 )+ 1.49 *( 64.4 -T)+ 1.49 *(T+273.15)*log((T+273.15)/ 337.57 )
GCA_001424565acpS.pdbA:Delta G(T) = -104.5 *(1-(T+273.15)/ 337.89 )+ 1.43 *( 64.7 -T)+ 1.43 *(T+273.15)*log((T+273.15)/ 337.89 )
GCA_001428005acpS.pdbA:Delta G(T) = -102.8 *(1-(T+273.15)/ 337.1 )+ 1.51 *( 64 -T)+ 1.51 *(T+273.15)*log((T+273.15)/ 337.1 )
GCA_001428075acpS.pdbA:Delta G(T) = -101.1 *(1-(T+273.15)/ 332.67 )+ 1.61 *( 59.5 -T)+ 1.61 *(T+273.15)*log((T+273.15)/ 332.67 )
GCA_001428325acpS.pdbA:Delta G(T) = -101.2 *(1-(T+273.15)/ 333.99 )+ 1.56 *( 60.8 -T)+ 1.56 *(T+273.15)*log((T+273.15)/ 333.99 )
GCA_001428335acpS.pdbA:Delta G(T) = -103.2 *(1-(T+273.15)/ 335.51 )+ 1.52 *( 62.4 -T)+ 1.52 *(T+273.15)*log((T+273.15)/ 335.51 )
GCA_001428365acpS.pdbA:Delta G(T) = -104.5 *(1-(T+273.15)/ 337.92 )+ 1.46 *( 64.8 -T)+ 1.46 *(T+273.15)*log((T+273.15)/ 337.92 )
GCA_001428435acpS.pdbA:Delta G(T) = -106.6 *(1-(T+273.15)/ 332.16 )+ 1.71 *( 59 -T)+ 1.71 *(T+273.15)*log((T+273.15)/ 332.16 )
GCA_001445575acpS.pdbA:Delta G(T) = -103.5 *(1-(T+273.15)/ 335.91 )+ 1.54 *( 62.8 -T)+ 1.54 *(T+273.15)*log((T+273.15)/ 335.91 )
GCA_001457025acpS.pdbA:Delta G(T) = -101.9 *(1-(T+273.15)/ 335.8 )+ 1.5 *( 62.6 -T)+ 1.5 *(T+273.15)*log((T+273.15)/ 335.8 )
GCA_001512285acpS.pdbA:Delta G(T) = -102.5 *(1-(T+273.15)/ 336.9 )+ 1.51 *( 63.7 -T)+ 1.51 *(T+273.15)*log((T+273.15)/ 336.9 )
GCA_001512305acpS.pdbA:Delta G(T) = -106.5 *(1-(T+273.15)/ 338.81 )+ 1.48 *( 65.7 -T)+ 1.48 *(T+273.15)*log((T+273.15)/ 338.81 )
GCA_001542565acpS.pdbA:Delta G(T) = -102.5 *(1-(T+273.15)/ 336.9 )+ 1.51 *( 63.7 -T)+ 1.51 *(T+273.15)*log((T+273.15)/ 336.9 )
GCA_001552075acpS.pdbA:Delta G(T) = -101.2 *(1-(T+273.15)/ 333.38 )+ 1.54 *( 60.2 -T)+ 1.54 *(T+273.15)*log((T+273.15)/ 333.38 )
GCA_001641125acpS.pdbA:Delta G(T) = -102.6 *(1-(T+273.15)/ 336.89 )+ 1.51 *( 63.7 -T)+ 1.51 *(T+273.15)*log((T+273.15)/ 336.89 )
GCA_001663775acpS.pdbA:Delta G(T) = -102.4 *(1-(T+273.15)/ 337.57 )+ 1.49 *( 64.4 -T)+ 1.49 *(T+273.15)*log((T+273.15)/ 337.57 )
GCA_001750145acpS.pdbA:Delta G(T) = -103.8 *(1-(T+273.15)/ 338.12 )+ 1.46 *( 65 -T)+ 1.46 *(T+273.15)*log((T+273.15)/ 338.12 )
GCA_001766675acpS.pdbA:Delta G(T) = -105.4 *(1-(T+273.15)/ 338.16 )+ 1.5 *( 65 -T)+ 1.5 *(T+273.15)*log((T+273.15)/ 338.16 )
GCA_001854365acpS.pdbA:Delta G(T) = -101.4 *(1-(T+273.15)/ 335.88 )+ 1.54 *( 62.7 -T)+ 1.54 *(T+273.15)*log((T+273.15)/ 335.88 )
GCA_001969265acpS.pdbA:Delta G(T) = -102.4 *(1-(T+273.15)/ 337.57 )+ 1.49 *( 64.4 -T)+ 1.49 *(T+273.15)*log((T+273.15)/ 337.57 )
GCA_002008315acpS.pdbA:Delta G(T) = -99.6 *(1-(T+273.15)/ 336.49 )+ 1.2 *( 63.3 -T)+ 1.2 *(T+273.15)*log((T+273.15)/ 336.49 )
GCA_002157505acpS.pdbA:Delta G(T) = -108.6 *(1-(T+273.15)/ 338.21 )+ 1.52 *( 65.1 -T)+ 1.52 *(T+273.15)*log((T+273.15)/ 338.21 )
GCA_002157565acpS.pdbA:Delta G(T) = -107.9 *(1-(T+273.15)/ 339.61 )+ 1.51 *( 66.5 -T)+ 1.51 *(T+273.15)*log((T+273.15)/ 339.61 )
GCA_002224285acpS.pdbA:Delta G(T) = -102.5 *(1-(T+273.15)/ 336.9 )+ 1.51 *( 63.7 -T)+ 1.51 *(T+273.15)*log((T+273.15)/ 336.9 )
GCA_002849715acpS.pdbA:Delta G(T) = -106.2 *(1-(T+273.15)/ 335.57 )+ 1.47 *( 62.4 -T)+ 1.47 *(T+273.15)*log((T+273.15)/ 335.57 )
GCA_002892795acpS.pdbA:Delta G(T) = -102.2 *(1-(T+273.15)/ 337.31 )+ 1.49 *( 64.2 -T)+ 1.49 *(T+273.15)*log((T+273.15)/ 337.31 )
GCA_002892835acpS.pdbA:Delta G(T) = -99.3 *(1-(T+273.15)/ 331.9 )+ 1.45 *( 58.8 -T)+ 1.45 *(T+273.15)*log((T+273.15)/ 331.9 )
GCA_002909415acpS.pdbA:Delta G(T) = -105.8 *(1-(T+273.15)/ 334.55 )+ 1.59 *( 61.4 -T)+ 1.59 *(T+273.15)*log((T+273.15)/ 334.55 )
GCA_002929215acpS.pdbA:Delta G(T) = -100.9 *(1-(T+273.15)/ 334.19 )+ 1.55 *( 61 -T)+ 1.55 *(T+273.15)*log((T+273.15)/ 334.19 )
GCA_002929255acpS.pdbA:Delta G(T) = -98.9 *(1-(T+273.15)/ 335.03 )+ 1.58 *( 61.9 -T)+ 1.58 *(T+273.15)*log((T+273.15)/ 335.03 )
GCA_002929275acpS.pdbA:Delta G(T) = -98.9 *(1-(T+273.15)/ 335.03 )+ 1.58 *( 61.9 -T)+ 1.58 *(T+273.15)*log((T+273.15)/ 335.03 )
GCA_002929295acpS.pdbA:Delta G(T) = -109.2 *(1-(T+273.15)/ 340.35 )+ 1.43 *( 67.2 -T)+ 1.43 *(T+273.15)*log((T+273.15)/ 340.35 )
GCA_002929305acpS.pdbA:Delta G(T) = -104.9 *(1-(T+273.15)/ 334.46 )+ 1.61 *( 61.3 -T)+ 1.61 *(T+273.15)*log((T+273.15)/ 334.46 )
GCA_002929335acpS.pdbA:Delta G(T) = -102.4 *(1-(T+273.15)/ 337.57 )+ 1.49 *( 64.4 -T)+ 1.49 *(T+273.15)*log((T+273.15)/ 337.57 )
GCA_002929355acpS.pdbA:Delta G(T) = -107.8 *(1-(T+273.15)/ 342.14 )+ 1.42 *( 69 -T)+ 1.42 *(T+273.15)*log((T+273.15)/ 342.14 )
GCA_002929375acpS.pdbA:Delta G(T) = -109.2 *(1-(T+273.15)/ 338.66 )+ 1.58 *( 65.5 -T)+ 1.58 *(T+273.15)*log((T+273.15)/ 338.66 )
GCA_002929385acpS.pdbA:Delta G(T) = -98.9 *(1-(T+273.15)/ 335.03 )+ 1.58 *( 61.9 -T)+ 1.58 *(T+273.15)*log((T+273.15)/ 335.03 )
GCA_002929455acpS.pdbA:Delta G(T) = -98.9 *(1-(T+273.15)/ 335.03 )+ 1.58 *( 61.9 -T)+ 1.58 *(T+273.15)*log((T+273.15)/ 335.03 )
GCA_002929705acpS.pdbA:Delta G(T) = -103.2 *(1-(T+273.15)/ 335.24 )+ 1.55 *( 62.1 -T)+ 1.55 *(T+273.15)*log((T+273.15)/ 335.24 )
GCA_002929745acpS.pdbA:Delta G(T) = -106.3 *(1-(T+273.15)/ 338.08 )+ 1.53 *( 64.9 -T)+ 1.53 *(T+273.15)*log((T+273.15)/ 338.08 )
GCA_002929755acpS.pdbA:Delta G(T) = -103.2 *(1-(T+273.15)/ 335.51 )+ 1.52 *( 62.4 -T)+ 1.52 *(T+273.15)*log((T+273.15)/ 335.51 )
GCA_002934405acpS.pdbA:Delta G(T) = -101.9 *(1-(T+273.15)/ 335.8 )+ 1.5 *( 62.6 -T)+ 1.5 *(T+273.15)*log((T+273.15)/ 335.8 )
GCA_002953935acpS.pdbA:Delta G(T) = -101.2 *(1-(T+273.15)/ 333.99 )+ 1.56 *( 60.8 -T)+ 1.56 *(T+273.15)*log((T+273.15)/ 333.99 )
GCA_002954225acpS.pdbA:Delta G(T) = -108.2 *(1-(T+273.15)/ 339.46 )+ 1.49 *( 66.3 -T)+ 1.49 *(T+273.15)*log((T+273.15)/ 339.46 )
GCA_003097355acpS.pdbA:Delta G(T) = -103.8 *(1-(T+273.15)/ 338.12 )+ 1.46 *( 65 -T)+ 1.46 *(T+273.15)*log((T+273.15)/ 338.12 )
GCA_003116525acpS.pdbA:Delta G(T) = -101.9 *(1-(T+273.15)/ 335.8 )+ 1.5 *( 62.6 -T)+ 1.5 *(T+273.15)*log((T+273.15)/ 335.8 )
GCA_003185915acpS.pdbA:Delta G(T) = -103.4 *(1-(T+273.15)/ 331.66 )+ 1.64 *( 58.5 -T)+ 1.64 *(T+273.15)*log((T+273.15)/ 331.66 )
GCA_003208335acpS.pdbA:Delta G(T) = -101.1 *(1-(T+273.15)/ 332.67 )+ 1.61 *( 59.5 -T)+ 1.61 *(T+273.15)*log((T+273.15)/ 332.67 )
GCA_003219795acpS.pdbA:Delta G(T) = -102.7 *(1-(T+273.15)/ 335.95 )+ 1.5 *( 62.8 -T)+ 1.5 *(T+273.15)*log((T+273.15)/ 335.95 )
GCA_003219815acpS.pdbA:Delta G(T) = -105 *(1-(T+273.15)/ 332.8 )+ 1.8 *( 59.6 -T)+ 1.8 *(T+273.15)*log((T+273.15)/ 332.8 )
GCA_003268655acpS.pdbA:Delta G(T) = -101.5 *(1-(T+273.15)/ 334.46 )+ 1.62 *( 61.3 -T)+ 1.62 *(T+273.15)*log((T+273.15)/ 334.46 )
GCA_003287955acpS.pdbA:Delta G(T) = -104 *(1-(T+273.15)/ 336.33 )+ 1.39 *( 63.2 -T)+ 1.39 *(T+273.15)*log((T+273.15)/ 336.33 )
GCA_900016675acpS.pdbA:Delta G(T) = -100.2 *(1-(T+273.15)/ 338.2 )+ 1.45 *( 65.1 -T)+ 1.45 *(T+273.15)*log((T+273.15)/ 338.2 )
GCA_900099735acpS.pdbA:Delta G(T) = -103.1 *(1-(T+273.15)/ 336.92 )+ 1.48 *( 63.8 -T)+ 1.48 *(T+273.15)*log((T+273.15)/ 336.92 )
GCA_900099975acpS.pdbA:Delta G(T) = -104.5 *(1-(T+273.15)/ 336.54 )+ 1.47 *( 63.4 -T)+ 1.47 *(T+273.15)*log((T+273.15)/ 336.54 )
GCA_900102785acpS.pdbA:Delta G(T) = -103 *(1-(T+273.15)/ 334.62 )+ 1.55 *( 61.5 -T)+ 1.55 *(T+273.15)*log((T+273.15)/ 334.62 )
GCA_900102805acpS.pdbA:Delta G(T) = -102.5 *(1-(T+273.15)/ 336.9 )+ 1.51 *( 63.7 -T)+ 1.51 *(T+273.15)*log((T+273.15)/ 336.9 )
GCA_900102895acpS.pdbA:Delta G(T) = -102.8 *(1-(T+273.15)/ 336.94 )+ 1.49 *( 63.8 -T)+ 1.49 *(T+273.15)*log((T+273.15)/ 336.94 )
GCA_900104405acpS.pdbA:Delta G(T) = -103.8 *(1-(T+273.15)/ 338.12 )+ 1.46 *( 65 -T)+ 1.46 *(T+273.15)*log((T+273.15)/ 338.12 )
GCA_900105345acpS.pdbA:Delta G(T) = -101.9 *(1-(T+273.15)/ 336.56 )+ 1.49 *( 63.4 -T)+ 1.49 *(T+273.15)*log((T+273.15)/ 336.56 )
GCA_900105535acpS.pdbA:Delta G(T) = -103.1 *(1-(T+273.15)/ 333.88 )+ 1.57 *( 60.7 -T)+ 1.57 *(T+273.15)*log((T+273.15)/ 333.88 )
GCA_900105965acpS.pdbA:Delta G(T) = -105.5 *(1-(T+273.15)/ 333.88 )+ 1.62 *( 60.7 -T)+ 1.62 *(T+273.15)*log((T+273.15)/ 333.88 )
GCA_900106835acpS.pdbA:Delta G(T) = -101.9 *(1-(T+273.15)/ 335.8 )+ 1.5 *( 62.6 -T)+ 1.5 *(T+273.15)*log((T+273.15)/ 335.8 )
GCA_900110595acpS.pdbA:Delta G(T) = -101.2 *(1-(T+273.15)/ 333.99 )+ 1.56 *( 60.8 -T)+ 1.56 *(T+273.15)*log((T+273.15)/ 333.99 )
GCA_900116495acpS.pdbA:Delta G(T) = -103.5 *(1-(T+273.15)/ 335.93 )+ 1.51 *( 62.8 -T)+ 1.51 *(T+273.15)*log((T+273.15)/ 335.93 )
GCA_900168135acpS.pdbA:Delta G(T) = -103.2 *(1-(T+273.15)/ 337.43 )+ 1.49 *( 64.3 -T)+ 1.49 *(T+273.15)*log((T+273.15)/ 337.43 )
GCA_900168225acpS.pdbA:Delta G(T) = -102.8 *(1-(T+273.15)/ 337.1 )+ 1.51 *( 64 -T)+ 1.51 *(T+273.15)*log((T+273.15)/ 337.1 )
GCA_000014925acpS.pdbA:Delta G(T) = -102.5 *(1-(T+273.15)/ 336.9 )+ 1.51 *( 63.7 -T)+ 1.51 *(T+273.15)*log((T+273.15)/ 336.9 )
GCA_000022025acpS.pdbA:Delta G(T) = -93.7 *(1-(T+273.15)/ 335.4 )+ 0.77 *( 62.3 -T)+ 0.77 *(T+273.15)*log((T+273.15)/ 335.4 )
GCA_000189535acpS.pdbA:Delta G(T) = -101.2 *(1-(T+273.15)/ 333.99 )+ 1.56 *( 60.8 -T)+ 1.56 *(T+273.15)*log((T+273.15)/ 333.99 )
GCA_000196235acpS.pdbA:Delta G(T) = -102.4 *(1-(T+273.15)/ 337.57 )+ 1.49 *( 64.4 -T)+ 1.49 *(T+273.15)*log((T+273.15)/ 337.57 )
GCA_000238915acpS.pdbA:Delta G(T) = -102.7 *(1-(T+273.15)/ 336.71 )+ 1.53 *( 63.6 -T)+ 1.53 *(T+273.15)*log((T+273.15)/ 336.71 )
GCA_000281065acpS.pdbA:Delta G(T) = -102.5 *(1-(T+273.15)/ 336.9 )+ 1.51 *( 63.7 -T)+ 1.51 *(T+273.15)*log((T+273.15)/ 336.9 )
GCA_000294595acpS.pdbA:Delta G(T) = -103.1 *(1-(T+273.15)/ 332.42 )+ 1.77 *( 59.3 -T)+ 1.77 *(T+273.15)*log((T+273.15)/ 332.42 )
GCA_000294695acpS.pdbA:Delta G(T) = -102.5 *(1-(T+273.15)/ 336.9 )+ 1.51 *( 63.7 -T)+ 1.51 *(T+273.15)*log((T+273.15)/ 336.9 )
GCA_000332815acpS.pdbA:Delta G(T) = -102.9 *(1-(T+273.15)/ 334.42 )+ 1.56 *( 61.3 -T)+ 1.56 *(T+273.15)*log((T+273.15)/ 334.42 )
GCA_000374865acpS.pdbA:Delta G(T) = -101.9 *(1-(T+273.15)/ 335.8 )+ 1.5 *( 62.6 -T)+ 1.5 *(T+273.15)*log((T+273.15)/ 335.8 )
GCA_000374905acpS.pdbA:Delta G(T) = -101.4 *(1-(T+273.15)/ 332.87 )+ 1.54 *( 59.7 -T)+ 1.54 *(T+273.15)*log((T+273.15)/ 332.87 )
GCA_000374925acpS.pdbA:Delta G(T) = -103.2 *(1-(T+273.15)/ 337.43 )+ 1.49 *( 64.3 -T)+ 1.49 *(T+273.15)*log((T+273.15)/ 337.43 )
GCA_000014925.faa_adhB.pdbA:Delta G(T) = -102.3 *(1-(T+273.15)/ 344.22 )+ 1.23 *( 71.1 -T)+ 1.23 *(T+273.15)*log((T+273.15)/ 344.22 )
GCA_000022025.faa_adhB.pdbA:Delta G(T) = -102.2 *(1-(T+273.15)/ 342.98 )+ 1.2 *( 69.8 -T)+ 1.2 *(T+273.15)*log((T+273.15)/ 342.98 )
GCA_000189535.faa_adhB.pdbA:Delta G(T) = -101.5 *(1-(T+273.15)/ 340.94 )+ 1.06 *( 67.8 -T)+ 1.06 *(T+273.15)*log((T+273.15)/ 340.94 )
GCA_000196235.faa_adhB.pdbA:Delta G(T) = -100.1 *(1-(T+273.15)/ 345.92 )+ 1.39 *( 72.8 -T)+ 1.39 *(T+273.15)*log((T+273.15)/ 345.92 )
GCA_000238915.faa_adhB.pdbA:Delta G(T) = -99.6 *(1-(T+273.15)/ 343.71 )+ 1.19 *( 70.6 -T)+ 1.19 *(T+273.15)*log((T+273.15)/ 343.71 )
GCA_000281065.faa_adhB.pdbA:Delta G(T) = -103 *(1-(T+273.15)/ 343.92 )+ 1.16 *( 70.8 -T)+ 1.16 *(T+273.15)*log((T+273.15)/ 343.92 )
GCA_000294595.faa_adhB.pdbA:Delta G(T) = -92.6 *(1-(T+273.15)/ 343.98 )+ 0.8 *( 70.8 -T)+ 0.8 *(T+273.15)*log((T+273.15)/ 343.98 )
GCA_000294695.faa_adhB.pdbA:Delta G(T) = -102.3 *(1-(T+273.15)/ 344.22 )+ 1.23 *( 71.1 -T)+ 1.23 *(T+273.15)*log((T+273.15)/ 344.22 )
GCA_000332815.faa_adhB.pdbA:Delta G(T) = -98.7 *(1-(T+273.15)/ 340.61 )+ 1.36 *( 67.5 -T)+ 1.36 *(T+273.15)*log((T+273.15)/ 340.61 )
GCA_000374865.faa_adhB.pdbA:Delta G(T) = -98.8 *(1-(T+273.15)/ 343.01 )+ 1.03 *( 69.9 -T)+ 1.03 *(T+273.15)*log((T+273.15)/ 343.01 )
GCA_000374905.faa_adhB.pdbA:Delta G(T) = -102 *(1-(T+273.15)/ 343.09 )+ 1.22 *( 69.9 -T)+ 1.22 *(T+273.15)*log((T+273.15)/ 343.09 )
GCA_000374925.faa_adhB.pdbA:Delta G(T) = -99 *(1-(T+273.15)/ 342.2 )+ 0.95 *( 69.1 -T)+ 0.95 *(T+273.15)*log((T+273.15)/ 342.2 )
GCA_000374945.faa_adhB.pdbA:Delta G(T) = -97.4 *(1-(T+273.15)/ 343.33 )+ 1.19 *( 70.2 -T)+ 1.19 *(T+273.15)*log((T+273.15)/ 343.33 )
GCA_000468215.faa_adhB.pdbA:Delta G(T) = -92.6 *(1-(T+273.15)/ 343.98 )+ 0.8 *( 70.8 -T)+ 0.8 *(T+273.15)*log((T+273.15)/ 343.98 )
GCA_000482545.faa_adhB.pdbA:Delta G(T) = -101.5 *(1-(T+273.15)/ 342.33 )+ 1.33 *( 69.2 -T)+ 1.33 *(T+273.15)*log((T+273.15)/ 342.33 )
GCA_000514015.faa_adhB.pdbA:Delta G(T) = -96.8 *(1-(T+273.15)/ 343.22 )+ 1.23 *( 70.1 -T)+ 1.23 *(T+273.15)*log((T+273.15)/ 343.22 )
GCA_000514155.faa_adhB.pdbA:Delta G(T) = -96.8 *(1-(T+273.15)/ 343.22 )+ 1.23 *( 70.1 -T)+ 1.23 *(T+273.15)*log((T+273.15)/ 343.22 )
GCA_000517125.faa_adhB.pdbA:Delta G(T) = -93.6 *(1-(T+273.15)/ 341.88 )+ 1.16 *( 68.7 -T)+ 1.16 *(T+273.15)*log((T+273.15)/ 341.88 )
GCA_000520555.faa_adhB.pdbA:Delta G(T) = -83 *(1-(T+273.15)/ 342.24 )+ 0.85 *( 69.1 -T)+ 0.85 *(T+273.15)*log((T+273.15)/ 342.24 )
GCA_000520575.faa_adhB.pdbA:Delta G(T) = -83 *(1-(T+273.15)/ 342.24 )+ 0.85 *( 69.1 -T)+ 0.85 *(T+273.15)*log((T+273.15)/ 342.24 )
GCA_000520595.faa_adhB.pdbA:Delta G(T) = -91.2 *(1-(T+273.15)/ 341.36 )+ 1.07 *( 68.2 -T)+ 1.07 *(T+273.15)*log((T+273.15)/ 341.36 )
GCA_000620385.faa_adhB.pdbA:Delta G(T) = -99.2 *(1-(T+273.15)/ 342.43 )+ 0.96 *( 69.3 -T)+ 0.96 *(T+273.15)*log((T+273.15)/ 342.43 )
GCA_000685965.faa_adhB.pdbA:Delta G(T) = -100.9 *(1-(T+273.15)/ 346.14 )+ 1.37 *( 73 -T)+ 1.37 *(T+273.15)*log((T+273.15)/ 346.14 )
GCA_000755585.faa_adhB.pdbA:Delta G(T) = -100.5 *(1-(T+273.15)/ 341.4 )+ 1.06 *( 68.2 -T)+ 1.06 *(T+273.15)*log((T+273.15)/ 341.4 )
GCA_000785535.faa_adhB.pdbA:Delta G(T) = -96.9 *(1-(T+273.15)/ 342.38 )+ 0.94 *( 69.2 -T)+ 0.94 *(T+273.15)*log((T+273.15)/ 342.38 )
GCA_000813845.faa_adhB.pdbA:Delta G(T) = -99 *(1-(T+273.15)/ 343.7 )+ 1.09 *( 70.6 -T)+ 1.09 *(T+273.15)*log((T+273.15)/ 343.7 )
GCA_000816565.faa_adhB.pdbA:Delta G(T) = -81.2 *(1-(T+273.15)/ 341.47 )+ 0.62 *( 68.3 -T)+ 0.62 *(T+273.15)*log((T+273.15)/ 341.47 )
GCA_000876655.faa_adhB.pdbA:Delta G(T) = -100.1 *(1-(T+273.15)/ 346.34 )+ 1.33 *( 73.2 -T)+ 1.33 *(T+273.15)*log((T+273.15)/ 346.34 )
GCA_000962805.faa_adhB.pdbA:Delta G(T) = -102.2 *(1-(T+273.15)/ 342.98 )+ 1.2 *( 69.8 -T)+ 1.2 *(T+273.15)*log((T+273.15)/ 342.98 )
GCA_001046895.faa_adhB.pdbA:Delta G(T) = -94.9 *(1-(T+273.15)/ 342.12 )+ 0.87 *( 69 -T)+ 0.87 *(T+273.15)*log((T+273.15)/ 342.12 )
GCA_001187915.faa_adhB.pdbA:Delta G(T) = -89.5 *(1-(T+273.15)/ 338.37 )+ 0.59 *( 65.2 -T)+ 0.59 *(T+273.15)*log((T+273.15)/ 338.37 )
GCA_001238605.faa_adhB.pdbA:Delta G(T) = -98.9 *(1-(T+273.15)/ 340.64 )+ 1.34 *( 67.5 -T)+ 1.34 *(T+273.15)*log((T+273.15)/ 340.64 )
GCA_001281315.faa_adhB.pdbA:Delta G(T) = -90.1 *(1-(T+273.15)/ 341.76 )+ 1.04 *( 68.6 -T)+ 1.04 *(T+273.15)*log((T+273.15)/ 341.76 )
GCA_001294625.faa_adhB.pdbA:Delta G(T) = -89.3 *(1-(T+273.15)/ 341.67 )+ 1.15 *( 68.5 -T)+ 1.15 *(T+273.15)*log((T+273.15)/ 341.67 )
GCA_001307035.faa_adhB.pdbA:Delta G(T) = -93.5 *(1-(T+273.15)/ 343.09 )+ 0.82 *( 69.9 -T)+ 0.82 *(T+273.15)*log((T+273.15)/ 343.09 )
GCA_001373495.faa_adhB.pdbA:Delta G(T) = -96.8 *(1-(T+273.15)/ 343.78 )+ 0.63 *( 70.6 -T)+ 0.63 *(T+273.15)*log((T+273.15)/ 343.78 )
GCA_001422645.faa_adhB.pdbA:Delta G(T) = -103.6 *(1-(T+273.15)/ 345.14 )+ 1.11 *( 72 -T)+ 1.11 *(T+273.15)*log((T+273.15)/ 345.14 )
GCA_001422665.faa_adhB.pdbA:Delta G(T) = -88.3 *(1-(T+273.15)/ 341.08 )+ 0.82 *( 67.9 -T)+ 0.82 *(T+273.15)*log((T+273.15)/ 341.08 )
GCA_001423525.faa_adhB.pdbA:Delta G(T) = -102.2 *(1-(T+273.15)/ 342.98 )+ 1.2 *( 69.8 -T)+ 1.2 *(T+273.15)*log((T+273.15)/ 342.98 )
GCA_001423745.faa_adhB.pdbA:Delta G(T) = -100.9 *(1-(T+273.15)/ 346.14 )+ 1.37 *( 73 -T)+ 1.37 *(T+273.15)*log((T+273.15)/ 346.14 )
GCA_001424565.faa_adhB.pdbA:Delta G(T) = -98.9 *(1-(T+273.15)/ 340.64 )+ 1.34 *( 67.5 -T)+ 1.34 *(T+273.15)*log((T+273.15)/ 340.64 )
GCA_001428005.faa_adhB.pdbA:Delta G(T) = -105.1 *(1-(T+273.15)/ 346.19 )+ 1.04 *( 73 -T)+ 1.04 *(T+273.15)*log((T+273.15)/ 346.19 )
GCA_001428075.faa_adhB.pdbA:Delta G(T) = -103.1 *(1-(T+273.15)/ 343.64 )+ 1.34 *( 70.5 -T)+ 1.34 *(T+273.15)*log((T+273.15)/ 343.64 )
GCA_001428325.faa_adhB.pdbA:Delta G(T) = -102 *(1-(T+273.15)/ 343.09 )+ 1.22 *( 69.9 -T)+ 1.22 *(T+273.15)*log((T+273.15)/ 343.09 )
GCA_001428335.faa_adhB.pdbA:Delta G(T) = -97.2 *(1-(T+273.15)/ 341.73 )+ 1.23 *( 68.6 -T)+ 1.23 *(T+273.15)*log((T+273.15)/ 341.73 )
GCA_001428365.faa_adhB.pdbA:Delta G(T) = -98.5 *(1-(T+273.15)/ 342.94 )+ 1.08 *( 69.8 -T)+ 1.08 *(T+273.15)*log((T+273.15)/ 342.94 )
GCA_001428435.faa_adhB.pdbA:Delta G(T) = -87.2 *(1-(T+273.15)/ 342.87 )+ 0.55 *( 69.7 -T)+ 0.55 *(T+273.15)*log((T+273.15)/ 342.87 )
GCA_001445575.faa_adhB.pdbA:Delta G(T) = -92.7 *(1-(T+273.15)/ 342.98 )+ 1.25 *( 69.8 -T)+ 1.25 *(T+273.15)*log((T+273.15)/ 342.98 )
GCA_001457025.faa_adhB.pdbA:Delta G(T) = -92.4 *(1-(T+273.15)/ 344.45 )+ 1 *( 71.3 -T)+ 1 *(T+273.15)*log((T+273.15)/ 344.45 )
GCA_001512285.faa_adhB.pdbA:Delta G(T) = -99.1 *(1-(T+273.15)/ 342.79 )+ 1.29 *( 69.6 -T)+ 1.29 *(T+273.15)*log((T+273.15)/ 342.79 )
GCA_001512305.faa_adhB.pdbA:Delta G(T) = -98.7 *(1-(T+273.15)/ 346.12 )+ 1.14 *( 73 -T)+ 1.14 *(T+273.15)*log((T+273.15)/ 346.12 )
GCA_001542565.faa_adhB.pdbA:Delta G(T) = -98.9 *(1-(T+273.15)/ 342.48 )+ 1.18 *( 69.3 -T)+ 1.18 *(T+273.15)*log((T+273.15)/ 342.48 )
GCA_001552075.faa_adhB.pdbA:Delta G(T) = -99 *(1-(T+273.15)/ 342.78 )+ 0.94 *( 69.6 -T)+ 0.94 *(T+273.15)*log((T+273.15)/ 342.78 )
GCA_001641125.faa_adhB.pdbA:Delta G(T) = -94.7 *(1-(T+273.15)/ 341.78 )+ 0.88 *( 68.6 -T)+ 0.88 *(T+273.15)*log((T+273.15)/ 341.78 )
GCA_001663775.faa_adhB.pdbA:Delta G(T) = -98.7 *(1-(T+273.15)/ 343.9 )+ 1.34 *( 70.7 -T)+ 1.34 *(T+273.15)*log((T+273.15)/ 343.9 )
GCA_001766675.faa_adhB.pdbA:Delta G(T) = -92.3 *(1-(T+273.15)/ 343.82 )+ 1.05 *( 70.7 -T)+ 1.05 *(T+273.15)*log((T+273.15)/ 343.82 )
GCA_001854365.faa_adhB.pdbA:Delta G(T) = -98.9 *(1-(T+273.15)/ 342.48 )+ 1.18 *( 69.3 -T)+ 1.18 *(T+273.15)*log((T+273.15)/ 342.48 )
GCA_001969265.faa_adhB.pdbA:Delta G(T) = -101.7 *(1-(T+273.15)/ 343.65 )+ 0.74 *( 70.5 -T)+ 0.74 *(T+273.15)*log((T+273.15)/ 343.65 )
GCA_002008315.faa_adhB.pdbA:Delta G(T) = -97.7 *(1-(T+273.15)/ 342.95 )+ 1.17 *( 69.8 -T)+ 1.17 *(T+273.15)*log((T+273.15)/ 342.95 )
GCA_002157505.faa_adhB.pdbA:Delta G(T) = -89.5 *(1-(T+273.15)/ 342.33 )+ 0.82 *( 69.2 -T)+ 0.82 *(T+273.15)*log((T+273.15)/ 342.33 )
GCA_002157565.faa_adhB.pdbA:Delta G(T) = -90.1 *(1-(T+273.15)/ 340.38 )+ 0.83 *( 67.2 -T)+ 0.83 *(T+273.15)*log((T+273.15)/ 340.38 )
GCA_002224285.faa_adhB.pdbA:Delta G(T) = -92.8 *(1-(T+273.15)/ 342.35 )+ 1.19 *( 69.2 -T)+ 1.19 *(T+273.15)*log((T+273.15)/ 342.35 )
GCA_002849715.faa_adhB.pdbA:Delta G(T) = -96.1 *(1-(T+273.15)/ 339.94 )+ 0.95 *( 66.8 -T)+ 0.95 *(T+273.15)*log((T+273.15)/ 339.94 )
GCA_002892795.faa_adhB.pdbA:Delta G(T) = -94.8 *(1-(T+273.15)/ 343.95 )+ 0.9 *( 70.8 -T)+ 0.9 *(T+273.15)*log((T+273.15)/ 343.95 )
GCA_002892835.faa_adhB.pdbA:Delta G(T) = -102.1 *(1-(T+273.15)/ 340.86 )+ 1.09 *( 67.7 -T)+ 1.09 *(T+273.15)*log((T+273.15)/ 340.86 )
GCA_002909415.faa_adhB.pdbA:Delta G(T) = -92.2 *(1-(T+273.15)/ 341.01 )+ 1.1 *( 67.9 -T)+ 1.1 *(T+273.15)*log((T+273.15)/ 341.01 )
GCA_002929215.faa_adhB.pdbA:Delta G(T) = -107.6 *(1-(T+273.15)/ 344.48 )+ 1.34 *( 71.3 -T)+ 1.34 *(T+273.15)*log((T+273.15)/ 344.48 )
GCA_002929255.faa_adhB.pdbA:Delta G(T) = -91.2 *(1-(T+273.15)/ 341.85 )+ 1.08 *( 68.7 -T)+ 1.08 *(T+273.15)*log((T+273.15)/ 341.85 )
GCA_002929275.faa_adhB.pdbA:Delta G(T) = -91.2 *(1-(T+273.15)/ 341.85 )+ 1.08 *( 68.7 -T)+ 1.08 *(T+273.15)*log((T+273.15)/ 341.85 )
GCA_002929295.faa_adhB.pdbA:Delta G(T) = -88 *(1-(T+273.15)/ 342.11 )+ 0.73 *( 69 -T)+ 0.73 *(T+273.15)*log((T+273.15)/ 342.11 )
GCA_002929305.faa_adhB.pdbA:Delta G(T) = -92.5 *(1-(T+273.15)/ 340.34 )+ 0.98 *( 67.2 -T)+ 0.98 *(T+273.15)*log((T+273.15)/ 340.34 )
GCA_002929335.faa_adhB.pdbA:Delta G(T) = -100 *(1-(T+273.15)/ 345.49 )+ 1.05 *( 72.3 -T)+ 1.05 *(T+273.15)*log((T+273.15)/ 345.49 )
GCA_002929355.faa_adhB.pdbA:Delta G(T) = -92 *(1-(T+273.15)/ 342.79 )+ 0.8 *( 69.6 -T)+ 0.8 *(T+273.15)*log((T+273.15)/ 342.79 )
GCA_002929375.faa_adhB.pdbA:Delta G(T) = -93.2 *(1-(T+273.15)/ 342.32 )+ 0.71 *( 69.2 -T)+ 0.71 *(T+273.15)*log((T+273.15)/ 342.32 )
GCA_002929385.faa_adhB.pdbA:Delta G(T) = -91.2 *(1-(T+273.15)/ 341.85 )+ 1.08 *( 68.7 -T)+ 1.08 *(T+273.15)*log((T+273.15)/ 341.85 )
GCA_002929455.faa_adhB.pdbA:Delta G(T) = -96.4 *(1-(T+273.15)/ 342 )+ 1.21 *( 68.9 -T)+ 1.21 *(T+273.15)*log((T+273.15)/ 342 )
GCA_002929705.faa_adhB.pdbA:Delta G(T) = -93.9 *(1-(T+273.15)/ 343.36 )+ 1.3 *( 70.2 -T)+ 1.3 *(T+273.15)*log((T+273.15)/ 343.36 )
GCA_002929745.faa_adhB.pdbA:Delta G(T) = -86.8 *(1-(T+273.15)/ 343.95 )+ 0.71 *( 70.8 -T)+ 0.71 *(T+273.15)*log((T+273.15)/ 343.95 )
GCA_002929755.faa_adhB.pdbA:Delta G(T) = -96.4 *(1-(T+273.15)/ 341.16 )+ 1.39 *( 68 -T)+ 1.39 *(T+273.15)*log((T+273.15)/ 341.16 )
GCA_002934405.faa_adhB.pdbA:Delta G(T) = -95.7 *(1-(T+273.15)/ 342.68 )+ 1.3 *( 69.5 -T)+ 1.3 *(T+273.15)*log((T+273.15)/ 342.68 )
GCA_002953935.faa_adhB.pdbA:Delta G(T) = -101.9 *(1-(T+273.15)/ 342.3 )+ 1.02 *( 69.2 -T)+ 1.02 *(T+273.15)*log((T+273.15)/ 342.3 )
GCA_002954225.faa_adhB.pdbA:Delta G(T) = -86.6 *(1-(T+273.15)/ 342.16 )+ 0.66 *( 69 -T)+ 0.66 *(T+273.15)*log((T+273.15)/ 342.16 )
GCA_003097355.faa_adhB.pdbA:Delta G(T) = -99.9 *(1-(T+273.15)/ 342.26 )+ 0.94 *( 69.1 -T)+ 0.94 *(T+273.15)*log((T+273.15)/ 342.26 )
GCA_003116525.faa_adhB.pdbA:Delta G(T) = -100.9 *(1-(T+273.15)/ 340.72 )+ 1.05 *( 67.6 -T)+ 1.05 *(T+273.15)*log((T+273.15)/ 340.72 )
GCA_003185915.faa_adhB.pdbA:Delta G(T) = -95 *(1-(T+273.15)/ 340.52 )+ 1.07 *( 67.4 -T)+ 1.07 *(T+273.15)*log((T+273.15)/ 340.52 )
GCA_003208335.faa_adhB.pdbA:Delta G(T) = -101.5 *(1-(T+273.15)/ 343.48 )+ 1.04 *( 70.3 -T)+ 1.04 *(T+273.15)*log((T+273.15)/ 343.48 )
GCA_003219795.faa_adhB.pdbA:Delta G(T) = -98.3 *(1-(T+273.15)/ 339.63 )+ 1.06 *( 66.5 -T)+ 1.06 *(T+273.15)*log((T+273.15)/ 339.63 )
GCA_003219815.faa_adhB.pdbA:Delta G(T) = -92.8 *(1-(T+273.15)/ 343.11 )+ 1.07 *( 70 -T)+ 1.07 *(T+273.15)*log((T+273.15)/ 343.11 )
GCA_003268655.faa_adhB.pdbA:Delta G(T) = -98.7 *(1-(T+273.15)/ 342.45 )+ 0.88 *( 69.3 -T)+ 0.88 *(T+273.15)*log((T+273.15)/ 342.45 )
GCA_003287955.faa_adhB.pdbA:Delta G(T) = -96.4 *(1-(T+273.15)/ 343.08 )+ 1.32 *( 69.9 -T)+ 1.32 *(T+273.15)*log((T+273.15)/ 343.08 )
GCA_900016675.faa_adhB.pdbA:Delta G(T) = -92.5 *(1-(T+273.15)/ 343.38 )+ 1.16 *( 70.2 -T)+ 1.16 *(T+273.15)*log((T+273.15)/ 343.38 )
GCA_900099735.faa_adhB.pdbA:Delta G(T) = -88.3 *(1-(T+273.15)/ 342.71 )+ 0.6 *( 69.6 -T)+ 0.6 *(T+273.15)*log((T+273.15)/ 342.71 )
GCA_900099975.faa_adhB.pdbA:Delta G(T) = -94.7 *(1-(T+273.15)/ 344.22 )+ 1.25 *( 71.1 -T)+ 1.25 *(T+273.15)*log((T+273.15)/ 344.22 )
GCA_900102785.faa_adhB.pdbA:Delta G(T) = -97.6 *(1-(T+273.15)/ 341.89 )+ 0.85 *( 68.7 -T)+ 0.85 *(T+273.15)*log((T+273.15)/ 341.89 )
GCA_900102805.faa_adhB.pdbA:Delta G(T) = -96.8 *(1-(T+273.15)/ 343.22 )+ 1.23 *( 70.1 -T)+ 1.23 *(T+273.15)*log((T+273.15)/ 343.22 )
GCA_900102895.faa_adhB.pdbA:Delta G(T) = -92.6 *(1-(T+273.15)/ 344.66 )+ 0.91 *( 71.5 -T)+ 0.91 *(T+273.15)*log((T+273.15)/ 344.66 )
GCA_900104405.faa_adhB.pdbA:Delta G(T) = -99.7 *(1-(T+273.15)/ 341.71 )+ 0.98 *( 68.6 -T)+ 0.98 *(T+273.15)*log((T+273.15)/ 341.71 )
GCA_900105345.faa_adhB.pdbA:Delta G(T) = -93.8 *(1-(T+273.15)/ 345.15 )+ 1.42 *( 72 -T)+ 1.42 *(T+273.15)*log((T+273.15)/ 345.15 )
GCA_900105535.faa_adhB.pdbA:Delta G(T) = -104.3 *(1-(T+273.15)/ 342.79 )+ 1.19 *( 69.6 -T)+ 1.19 *(T+273.15)*log((T+273.15)/ 342.79 )
GCA_900105965.faa_adhB.pdbA:Delta G(T) = -100.5 *(1-(T+273.15)/ 341.4 )+ 1.06 *( 68.2 -T)+ 1.06 *(T+273.15)*log((T+273.15)/ 341.4 )
GCA_900106835.faa_adhB.pdbA:Delta G(T) = -95.3 *(1-(T+273.15)/ 342.51 )+ 1.28 *( 69.4 -T)+ 1.28 *(T+273.15)*log((T+273.15)/ 342.51 )
GCA_900110595.faa_adhB.pdbA:Delta G(T) = -103.2 *(1-(T+273.15)/ 343.99 )+ 1.34 *( 70.8 -T)+ 1.34 *(T+273.15)*log((T+273.15)/ 343.99 )
GCA_900116495.faa_adhB.pdbA:Delta G(T) = -99.9 *(1-(T+273.15)/ 341.99 )+ 0.95 *( 68.8 -T)+ 0.95 *(T+273.15)*log((T+273.15)/ 341.99 )
GCA_900168135.faa_adhB.pdbA:Delta G(T) = -99.4 *(1-(T+273.15)/ 342.4 )+ 0.99 *( 69.2 -T)+ 0.99 *(T+273.15)*log((T+273.15)/ 342.4 )
GCA_900168225.faa_adhB.pdbA:Delta G(T) = -97.4 *(1-(T+273.15)/ 343.33 )+ 1.19 *( 70.2 -T)+ 1.19 *(T+273.15)*log((T+273.15)/ 343.33 )
GCA_000014925.amylase:Delta G(T) = -205.6 *(1-(T+273.15)/ 329.98 )+ 4.07 *( 56.8 -T)+ 4.07 *(T+273.15)*log((T+273.15)/ 329.98 )
GCA_000022025.amylase:Delta G(T) = -199.2 *(1-(T+273.15)/ 327.33 )+ 3.04 *( 54.2 -T)+ 3.04 *(T+273.15)*log((T+273.15)/ 327.33 )
GCA_000189535.amylase:Delta G(T) = -208.4 *(1-(T+273.15)/ 324.99 )+ 3.32 *( 51.8 -T)+ 3.32 *(T+273.15)*log((T+273.15)/ 324.99 )
GCA_000196235.amylase:Delta G(T) = -183.9 *(1-(T+273.15)/ 329.01 )+ 3.54 *( 55.9 -T)+ 3.54 *(T+273.15)*log((T+273.15)/ 329.01 )
GCA_000238915.amylase:Delta G(T) = -190.8 *(1-(T+273.15)/ 324.68 )+ 2.39 *( 51.5 -T)+ 2.39 *(T+273.15)*log((T+273.15)/ 324.68 )
GCA_000281065.amylase:Delta G(T) = -187.2 *(1-(T+273.15)/ 335.33 )+ 4.04 *( 62.2 -T)+ 4.04 *(T+273.15)*log((T+273.15)/ 335.33 )
GCA_000294595.amylase:Delta G(T) = -164.3 *(1-(T+273.15)/ 321.99 )+ 1.49 *( 48.8 -T)+ 1.49 *(T+273.15)*log((T+273.15)/ 321.99 )
GCA_000294695.amylase:Delta G(T) = -205.2 *(1-(T+273.15)/ 329.83 )+ 3.88 *( 56.7 -T)+ 3.88 *(T+273.15)*log((T+273.15)/ 329.83 )
GCA_000332815.amylase:Delta G(T) = -186.1 *(1-(T+273.15)/ 322.39 )+ 2.66 *( 49.2 -T)+ 2.66 *(T+273.15)*log((T+273.15)/ 322.39 )
GCA_000374865.amylase:Delta G(T) = -195.4 *(1-(T+273.15)/ 321.87 )+ 2.58 *( 48.7 -T)+ 2.58 *(T+273.15)*log((T+273.15)/ 321.87 )
GCA_000374905.amylase:Delta G(T) = -210.2 *(1-(T+273.15)/ 326.24 )+ 2.82 *( 53.1 -T)+ 2.82 *(T+273.15)*log((T+273.15)/ 326.24 )
GCA_000374925.amylase:Delta G(T) = -182.8 *(1-(T+273.15)/ 334.67 )+ 3.33 *( 61.5 -T)+ 3.33 *(T+273.15)*log((T+273.15)/ 334.67 )
GCA_000374945.amylase:Delta G(T) = -181.7 *(1-(T+273.15)/ 336.33 )+ 3.78 *( 63.2 -T)+ 3.78 *(T+273.15)*log((T+273.15)/ 336.33 )
GCA_000468215.amylase:Delta G(T) = -164.3 *(1-(T+273.15)/ 321.99 )+ 1.49 *( 48.8 -T)+ 1.49 *(T+273.15)*log((T+273.15)/ 321.99 )
GCA_000482545.amylase:Delta G(T) = -222.4 *(1-(T+273.15)/ 335.43 )+ 5.23 *( 62.3 -T)+ 5.23 *(T+273.15)*log((T+273.15)/ 335.43 )
GCA_000514015.amylase:Delta G(T) = -174.1 *(1-(T+273.15)/ 333.52 )+ 3.06 *( 60.4 -T)+ 3.06 *(T+273.15)*log((T+273.15)/ 333.52 )
GCA_000514155.amylase:Delta G(T) = -167.1 *(1-(T+273.15)/ 331.83 )+ 3.04 *( 58.7 -T)+ 3.04 *(T+273.15)*log((T+273.15)/ 331.83 )
GCA_000517125.amylase:Delta G(T) = -214.3 *(1-(T+273.15)/ 332.12 )+ 2.94 *( 59 -T)+ 2.94 *(T+273.15)*log((T+273.15)/ 332.12 )
GCA_000520555.amylase:Delta G(T) = -208.9 *(1-(T+273.15)/ 324.77 )+ 2.64 *( 51.6 -T)+ 2.64 *(T+273.15)*log((T+273.15)/ 324.77 )
GCA_000520575.amylase:Delta G(T) = -208.9 *(1-(T+273.15)/ 324.77 )+ 2.64 *( 51.6 -T)+ 2.64 *(T+273.15)*log((T+273.15)/ 324.77 )
GCA_000520595.amylase:Delta G(T) = -186.7 *(1-(T+273.15)/ 325.63 )+ 3.11 *( 52.5 -T)+ 3.11 *(T+273.15)*log((T+273.15)/ 325.63 )
GCA_000620385.amylase:Delta G(T) = -187.1 *(1-(T+273.15)/ 330.26 )+ 2.8 *( 57.1 -T)+ 2.8 *(T+273.15)*log((T+273.15)/ 330.26 )
GCA_000685965.amylase:Delta G(T) = -117.1 *(1-(T+273.15)/ 329.38 )+ 1.1 *( 56.2 -T)+ 1.1 *(T+273.15)*log((T+273.15)/ 329.38 )
GCA_000755585.amylase:Delta G(T) = -210.2 *(1-(T+273.15)/ 334.14 )+ 4.8 *( 61 -T)+ 4.8 *(T+273.15)*log((T+273.15)/ 334.14 )
GCA_000785535.amylase:Delta G(T) = -202.8 *(1-(T+273.15)/ 336.32 )+ 5.39 *( 63.2 -T)+ 5.39 *(T+273.15)*log((T+273.15)/ 336.32 )
GCA_000813845.amylase:Delta G(T) = -228.3 *(1-(T+273.15)/ 330.42 )+ 3.57 *( 57.3 -T)+ 3.57 *(T+273.15)*log((T+273.15)/ 330.42 )
GCA_000816565.amylase:Delta G(T) = -179.4 *(1-(T+273.15)/ 328.74 )+ 3.37 *( 55.6 -T)+ 3.37 *(T+273.15)*log((T+273.15)/ 328.74 )
GCA_000876655.amylase:Delta G(T) = -118.8 *(1-(T+273.15)/ 332.47 )+ 1.84 *( 59.3 -T)+ 1.84 *(T+273.15)*log((T+273.15)/ 332.47 )
GCA_000962805.amylase:Delta G(T) = -200.8 *(1-(T+273.15)/ 322.67 )+ 2.98 *( 49.5 -T)+ 2.98 *(T+273.15)*log((T+273.15)/ 322.67 )
GCA_001046895.amylase:Delta G(T) = -219.2 *(1-(T+273.15)/ 320.64 )+ 3.45 *( 47.5 -T)+ 3.45 *(T+273.15)*log((T+273.15)/ 320.64 )
GCA_001187915.amylase:Delta G(T) = -179.1 *(1-(T+273.15)/ 331.06 )+ 3.16 *( 57.9 -T)+ 3.16 *(T+273.15)*log((T+273.15)/ 331.06 )
GCA_001238605.amylase:Delta G(T) = -156 *(1-(T+273.15)/ 327.29 )+ 2.09 *( 54.1 -T)+ 2.09 *(T+273.15)*log((T+273.15)/ 327.29 )
GCA_001281315.amylase:Delta G(T) = -216.3 *(1-(T+273.15)/ 337.99 )+ 4.63 *( 64.8 -T)+ 4.63 *(T+273.15)*log((T+273.15)/ 337.99 )
GCA_001294625.amylase:Delta G(T) = -205.1 *(1-(T+273.15)/ 336.59 )+ 4.74 *( 63.4 -T)+ 4.74 *(T+273.15)*log((T+273.15)/ 336.59 )
GCA_001307035.amylase:Delta G(T) = -171 *(1-(T+273.15)/ 329.59 )+ 3 *( 56.4 -T)+ 3 *(T+273.15)*log((T+273.15)/ 329.59 )
GCA_001373495.amylase:Delta G(T) = -159.4 *(1-(T+273.15)/ 329.54 )+ 3.37 *( 56.4 -T)+ 3.37 *(T+273.15)*log((T+273.15)/ 329.54 )
GCA_001422645.amylase:Delta G(T) = -186.7 *(1-(T+273.15)/ 326.76 )+ 2.55 *( 53.6 -T)+ 2.55 *(T+273.15)*log((T+273.15)/ 326.76 )
GCA_001422665.amylase:Delta G(T) = -203.5 *(1-(T+273.15)/ 331.71 )+ 3.46 *( 58.6 -T)+ 3.46 *(T+273.15)*log((T+273.15)/ 331.71 )
GCA_001423525.amylase:Delta G(T) = -209.8 *(1-(T+273.15)/ 328.02 )+ 3.19 *( 54.9 -T)+ 3.19 *(T+273.15)*log((T+273.15)/ 328.02 )
GCA_001423745.amylase:Delta G(T) = -179.5 *(1-(T+273.15)/ 329.25 )+ 2.62 *( 56.1 -T)+ 2.62 *(T+273.15)*log((T+273.15)/ 329.25 )
GCA_001424565.amylase:Delta G(T) = -227.5 *(1-(T+273.15)/ 327.8 )+ 4.18 *( 54.6 -T)+ 4.18 *(T+273.15)*log((T+273.15)/ 327.8 )
GCA_001428005.amylase:Delta G(T) = -227.2 *(1-(T+273.15)/ 331.94 )+ 4.3 *( 58.8 -T)+ 4.3 *(T+273.15)*log((T+273.15)/ 331.94 )
GCA_001428075.amylase:Delta G(T) = -197.9 *(1-(T+273.15)/ 326.38 )+ 2.36 *( 53.2 -T)+ 2.36 *(T+273.15)*log((T+273.15)/ 326.38 )
GCA_001428325.amylase:Delta G(T) = -185.2 *(1-(T+273.15)/ 323.2 )+ 2.21 *( 50.1 -T)+ 2.21 *(T+273.15)*log((T+273.15)/ 323.2 )
GCA_001428335.amylase:Delta G(T) = -226.8 *(1-(T+273.15)/ 329.13 )+ 3.9 *( 56 -T)+ 3.9 *(T+273.15)*log((T+273.15)/ 329.13 )
GCA_001428365.amylase:Delta G(T) = -190.6 *(1-(T+273.15)/ 333.13 )+ 3.92 *( 60 -T)+ 3.92 *(T+273.15)*log((T+273.15)/ 333.13 )
GCA_001428435.amylase:Delta G(T) = -214.1 *(1-(T+273.15)/ 325.53 )+ 2.73 *( 52.4 -T)+ 2.73 *(T+273.15)*log((T+273.15)/ 325.53 )
GCA_001445575.amylase:Delta G(T) = -201.2 *(1-(T+273.15)/ 332.69 )+ 3.82 *( 59.5 -T)+ 3.82 *(T+273.15)*log((T+273.15)/ 332.69 )
GCA_001457025.amylase:Delta G(T) = -192 *(1-(T+273.15)/ 326.72 )+ 2.5 *( 53.6 -T)+ 2.5 *(T+273.15)*log((T+273.15)/ 326.72 )
GCA_001512285.amylase:Delta G(T) = -200.2 *(1-(T+273.15)/ 334.26 )+ 4.07 *( 61.1 -T)+ 4.07 *(T+273.15)*log((T+273.15)/ 334.26 )
GCA_001512305.amylase:Delta G(T) = -191.1 *(1-(T+273.15)/ 325.86 )+ 2.82 *( 52.7 -T)+ 2.82 *(T+273.15)*log((T+273.15)/ 325.86 )
GCA_001542565.amylase:Delta G(T) = -200.6 *(1-(T+273.15)/ 332.07 )+ 3.51 *( 58.9 -T)+ 3.51 *(T+273.15)*log((T+273.15)/ 332.07 )
GCA_001552075.amylase:Delta G(T) = -176 *(1-(T+273.15)/ 329.84 )+ 3.92 *( 56.7 -T)+ 3.92 *(T+273.15)*log((T+273.15)/ 329.84 )
GCA_001641125.amylase:Delta G(T) = -203.5 *(1-(T+273.15)/ 327.82 )+ 3.51 *( 54.7 -T)+ 3.51 *(T+273.15)*log((T+273.15)/ 327.82 )
GCA_001663775.amylase:Delta G(T) = -212.9 *(1-(T+273.15)/ 323.54 )+ 2.77 *( 50.4 -T)+ 2.77 *(T+273.15)*log((T+273.15)/ 323.54 )
GCA_001750145.amylase:Delta G(T) = -200.2 *(1-(T+273.15)/ 325.12 )+ 2.83 *( 52 -T)+ 2.83 *(T+273.15)*log((T+273.15)/ 325.12 )
GCA_001766675.amylase:Delta G(T) = -178.7 *(1-(T+273.15)/ 322.97 )+ 1.98 *( 49.8 -T)+ 1.98 *(T+273.15)*log((T+273.15)/ 322.97 )
GCA_001854365.amylase:Delta G(T) = -199.8 *(1-(T+273.15)/ 331.49 )+ 3.52 *( 58.3 -T)+ 3.52 *(T+273.15)*log((T+273.15)/ 331.49 )
GCA_001969265.amylase:Delta G(T) = -191.3 *(1-(T+273.15)/ 326.92 )+ 2.71 *( 53.8 -T)+ 2.71 *(T+273.15)*log((T+273.15)/ 326.92 )
GCA_002008315.amylase:Delta G(T) = -236.7 *(1-(T+273.15)/ 329.53 )+ 4.08 *( 56.4 -T)+ 4.08 *(T+273.15)*log((T+273.15)/ 329.53 )
GCA_002157505.amylase:Delta G(T) = -194.6 *(1-(T+273.15)/ 334.26 )+ 3.43 *( 61.1 -T)+ 3.43 *(T+273.15)*log((T+273.15)/ 334.26 )
GCA_002157565.amylase:Delta G(T) = -182.4 *(1-(T+273.15)/ 330.22 )+ 2.79 *( 57.1 -T)+ 2.79 *(T+273.15)*log((T+273.15)/ 330.22 )
GCA_002224285.amylase:Delta G(T) = -183.1 *(1-(T+273.15)/ 331.48 )+ 3.03 *( 58.3 -T)+ 3.03 *(T+273.15)*log((T+273.15)/ 331.48 )
GCA_002849715.amylase:Delta G(T) = -209.5 *(1-(T+273.15)/ 328.4 )+ 4.26 *( 55.2 -T)+ 4.26 *(T+273.15)*log((T+273.15)/ 328.4 )
GCA_002892795.amylase:Delta G(T) = -174.4 *(1-(T+273.15)/ 324.11 )+ 2.1 *( 51 -T)+ 2.1 *(T+273.15)*log((T+273.15)/ 324.11 )
GCA_002892835.amylase:Delta G(T) = -185.3 *(1-(T+273.15)/ 325.2 )+ 2.55 *( 52.1 -T)+ 2.55 *(T+273.15)*log((T+273.15)/ 325.2 )
GCA_002909415.amylase:Delta G(T) = -184.8 *(1-(T+273.15)/ 332.82 )+ 4.54 *( 59.7 -T)+ 4.54 *(T+273.15)*log((T+273.15)/ 332.82 )
GCA_002929215.amylase:Delta G(T) = -204.1 *(1-(T+273.15)/ 329.21 )+ 4.41 *( 56.1 -T)+ 4.41 *(T+273.15)*log((T+273.15)/ 329.21 )
GCA_002929255.amylase:Delta G(T) = -189.1 *(1-(T+273.15)/ 328.36 )+ 4.22 *( 55.2 -T)+ 4.22 *(T+273.15)*log((T+273.15)/ 328.36 )
GCA_002929275.amylase:Delta G(T) = -189.1 *(1-(T+273.15)/ 328.36 )+ 4.22 *( 55.2 -T)+ 4.22 *(T+273.15)*log((T+273.15)/ 328.36 )
GCA_002929295.amylase:Delta G(T) = -183.8 *(1-(T+273.15)/ 333.24 )+ 3.68 *( 60.1 -T)+ 3.68 *(T+273.15)*log((T+273.15)/ 333.24 )
GCA_002929305.amylase:Delta G(T) = -192.4 *(1-(T+273.15)/ 337.42 )+ 4.51 *( 64.3 -T)+ 4.51 *(T+273.15)*log((T+273.15)/ 337.42 )
GCA_002929335.amylase:Delta G(T) = -197.6 *(1-(T+273.15)/ 332.26 )+ 3.73 *( 59.1 -T)+ 3.73 *(T+273.15)*log((T+273.15)/ 332.26 )
GCA_002929375.amylase:Delta G(T) = -198.8 *(1-(T+273.15)/ 331.6 )+ 3.36 *( 58.5 -T)+ 3.36 *(T+273.15)*log((T+273.15)/ 331.6 )
GCA_002929385.amylase:Delta G(T) = -189.1 *(1-(T+273.15)/ 328.36 )+ 4.22 *( 55.2 -T)+ 4.22 *(T+273.15)*log((T+273.15)/ 328.36 )
GCA_002929455.amylase:Delta G(T) = -191.2 *(1-(T+273.15)/ 329.25 )+ 4.26 *( 56.1 -T)+ 4.26 *(T+273.15)*log((T+273.15)/ 329.25 )
GCA_002929705.amylase:Delta G(T) = -192.8 *(1-(T+273.15)/ 336.72 )+ 4.11 *( 63.6 -T)+ 4.11 *(T+273.15)*log((T+273.15)/ 336.72 )
GCA_002929745.amylase:Delta G(T) = -187 *(1-(T+273.15)/ 326 )+ 2.81 *( 52.8 -T)+ 2.81 *(T+273.15)*log((T+273.15)/ 326 )
GCA_002929755.amylase:Delta G(T) = -213.5 *(1-(T+273.15)/ 326.56 )+ 3.18 *( 53.4 -T)+ 3.18 *(T+273.15)*log((T+273.15)/ 326.56 )
GCA_002934405.amylase:Delta G(T) = -213.8 *(1-(T+273.15)/ 324.22 )+ 3.29 *( 51.1 -T)+ 3.29 *(T+273.15)*log((T+273.15)/ 324.22 )
GCA_002953935.amylase:Delta G(T) = -207.1 *(1-(T+273.15)/ 328.82 )+ 3.12 *( 55.7 -T)+ 3.12 *(T+273.15)*log((T+273.15)/ 328.82 )
GCA_002954225.amylase:Delta G(T) = -172.4 *(1-(T+273.15)/ 333.38 )+ 3.36 *( 60.2 -T)+ 3.36 *(T+273.15)*log((T+273.15)/ 333.38 )
GCA_003097355.amylase:Delta G(T) = -211.8 *(1-(T+273.15)/ 329.08 )+ 2.92 *( 55.9 -T)+ 2.92 *(T+273.15)*log((T+273.15)/ 329.08 )
GCA_003116525.amylase:Delta G(T) = -183.5 *(1-(T+273.15)/ 322.73 )+ 2.55 *( 49.6 -T)+ 2.55 *(T+273.15)*log((T+273.15)/ 322.73 )
GCA_003185915.amylase:Delta G(T) = -173.5 *(1-(T+273.15)/ 334.42 )+ 3.72 *( 61.3 -T)+ 3.72 *(T+273.15)*log((T+273.15)/ 334.42 )
GCA_003208335.amylase:Delta G(T) = -197.8 *(1-(T+273.15)/ 325.96 )+ 2.79 *( 52.8 -T)+ 2.79 *(T+273.15)*log((T+273.15)/ 325.96 )
GCA_003219795.amylase:Delta G(T) = -213.7 *(1-(T+273.15)/ 338.25 )+ 4.85 *( 65.1 -T)+ 4.85 *(T+273.15)*log((T+273.15)/ 338.25 )
GCA_003219815.amylase:Delta G(T) = -218.2 *(1-(T+273.15)/ 334.35 )+ 3.95 *( 61.2 -T)+ 3.95 *(T+273.15)*log((T+273.15)/ 334.35 )
GCA_003268655.amylase:Delta G(T) = -190.5 *(1-(T+273.15)/ 337.35 )+ 5.05 *( 64.2 -T)+ 5.05 *(T+273.15)*log((T+273.15)/ 337.35 )
GCA_003287955.amylase:Delta G(T) = -217.1 *(1-(T+273.15)/ 327.15 )+ 3.41 *( 54 -T)+ 3.41 *(T+273.15)*log((T+273.15)/ 327.15 )
GCA_900016675.amylase:Delta G(T) = -198.2 *(1-(T+273.15)/ 318.1 )+ 2.89 *( 45 -T)+ 2.89 *(T+273.15)*log((T+273.15)/ 318.1 )
GCA_900099735.amylase:Delta G(T) = -202.6 *(1-(T+273.15)/ 330.79 )+ 4.13 *( 57.6 -T)+ 4.13 *(T+273.15)*log((T+273.15)/ 330.79 )
GCA_900099975.amylase:Delta G(T) = -134.4 *(1-(T+273.15)/ 325.97 )+ 1.1 *( 52.8 -T)+ 1.1 *(T+273.15)*log((T+273.15)/ 325.97 )
GCA_900102785.amylase:Delta G(T) = -197 *(1-(T+273.15)/ 327.92 )+ 2.88 *( 54.8 -T)+ 2.88 *(T+273.15)*log((T+273.15)/ 327.92 )
GCA_900102805.amylase:Delta G(T) = -176.4 *(1-(T+273.15)/ 333.45 )+ 3.01 *( 60.3 -T)+ 3.01 *(T+273.15)*log((T+273.15)/ 333.45 )
GCA_900102895.amylase:Delta G(T) = -197.7 *(1-(T+273.15)/ 331.14 )+ 2.93 *( 58 -T)+ 2.93 *(T+273.15)*log((T+273.15)/ 331.14 )
GCA_900104405.amylase:Delta G(T) = -118.4 *(1-(T+273.15)/ 329.68 )+ 0.79 *( 56.5 -T)+ 0.79 *(T+273.15)*log((T+273.15)/ 329.68 )
GCA_900105345.amylase:Delta G(T) = -187.5 *(1-(T+273.15)/ 326.41 )+ 3.47 *( 53.3 -T)+ 3.47 *(T+273.15)*log((T+273.15)/ 326.41 )
GCA_900105535.amylase:Delta G(T) = -211.2 *(1-(T+273.15)/ 328 )+ 3.6 *( 54.9 -T)+ 3.6 *(T+273.15)*log((T+273.15)/ 328 )
GCA_900105965.amylase:Delta G(T) = -212.7 *(1-(T+273.15)/ 335.25 )+ 4.97 *( 62.1 -T)+ 4.97 *(T+273.15)*log((T+273.15)/ 335.25 )
GCA_900106835.amylase:Delta G(T) = -204.9 *(1-(T+273.15)/ 331.83 )+ 4.09 *( 58.7 -T)+ 4.09 *(T+273.15)*log((T+273.15)/ 331.83 )
GCA_900110595.amylase:Delta G(T) = -208.7 *(1-(T+273.15)/ 323.48 )+ 3.4 *( 50.3 -T)+ 3.4 *(T+273.15)*log((T+273.15)/ 323.48 )
GCA_900116495.amylase:Delta G(T) = -187.2 *(1-(T+273.15)/ 330.66 )+ 3.54 *( 57.5 -T)+ 3.54 *(T+273.15)*log((T+273.15)/ 330.66 )
GCA_900168135.amylase:Delta G(T) = -195.1 *(1-(T+273.15)/ 331.28 )+ 3.34 *( 58.1 -T)+ 3.34 *(T+273.15)*log((T+273.15)/ 331.28 )
GCA_900168225.amylase:Delta G(T) = -182.3 *(1-(T+273.15)/ 334.57 )+ 3.64 *( 61.4 -T)+ 3.64 *(T+273.15)*log((T+273.15)/ 334.57 )
GCA_000374945apn1.pdbA:Delta G(T) = -92.5 *(1-(T+273.15)/ 340.59 )+ 1.26 *( 67.4 -T)+ 1.26 *(T+273.15)*log((T+273.15)/ 340.59 )
GCA_000468215apn1.pdbA:Delta G(T) = -83.2 *(1-(T+273.15)/ 339.73 )+ 1.26 *( 66.6 -T)+ 1.26 *(T+273.15)*log((T+273.15)/ 339.73 )
GCA_000482545apn1.pdbA:Delta G(T) = -89.4 *(1-(T+273.15)/ 339.77 )+ 1.15 *( 66.6 -T)+ 1.15 *(T+273.15)*log((T+273.15)/ 339.77 )
GCA_000514015apn1.pdbA:Delta G(T) = -88.7 *(1-(T+273.15)/ 341.44 )+ 1.35 *( 68.3 -T)+ 1.35 *(T+273.15)*log((T+273.15)/ 341.44 )
GCA_000514155apn1.pdbA:Delta G(T) = -88.7 *(1-(T+273.15)/ 341.44 )+ 1.35 *( 68.3 -T)+ 1.35 *(T+273.15)*log((T+273.15)/ 341.44 )
GCA_000517125apn1.pdbA:Delta G(T) = -85 *(1-(T+273.15)/ 339.74 )+ 1.34 *( 66.6 -T)+ 1.34 *(T+273.15)*log((T+273.15)/ 339.74 )
GCA_000520555apn1.pdbA:Delta G(T) = -86.2 *(1-(T+273.15)/ 340.79 )+ 1.29 *( 67.6 -T)+ 1.29 *(T+273.15)*log((T+273.15)/ 340.79 )
GCA_000520575apn1.pdbA:Delta G(T) = -86.2 *(1-(T+273.15)/ 340.79 )+ 1.29 *( 67.6 -T)+ 1.29 *(T+273.15)*log((T+273.15)/ 340.79 )
GCA_000520595apn1.pdbA:Delta G(T) = -83.2 *(1-(T+273.15)/ 342.33 )+ 1.1 *( 69.2 -T)+ 1.1 *(T+273.15)*log((T+273.15)/ 342.33 )
GCA_000620385apn1.pdbA:Delta G(T) = -86.5 *(1-(T+273.15)/ 339.4 )+ 1.54 *( 66.2 -T)+ 1.54 *(T+273.15)*log((T+273.15)/ 339.4 )
GCA_000685965apn1.pdbA:Delta G(T) = -83.6 *(1-(T+273.15)/ 338 )+ 1.28 *( 64.8 -T)+ 1.28 *(T+273.15)*log((T+273.15)/ 338 )
GCA_000755585apn1.pdbA:Delta G(T) = -88 *(1-(T+273.15)/ 341.17 )+ 1.34 *( 68 -T)+ 1.34 *(T+273.15)*log((T+273.15)/ 341.17 )
GCA_000785535apn1.pdbA:Delta G(T) = -76.6 *(1-(T+273.15)/ 341.73 )+ 0.2 *( 68.6 -T)+ 0.2 *(T+273.15)*log((T+273.15)/ 341.73 )
GCA_000813845apn1.pdbA:Delta G(T) = -84 *(1-(T+273.15)/ 339.89 )+ 1.37 *( 66.7 -T)+ 1.37 *(T+273.15)*log((T+273.15)/ 339.89 )
GCA_000816565apn1.pdbA:Delta G(T) = -84.1 *(1-(T+273.15)/ 340.7 )+ 1.34 *( 67.5 -T)+ 1.34 *(T+273.15)*log((T+273.15)/ 340.7 )
GCA_000876655apn1.pdbA:Delta G(T) = -82.7 *(1-(T+273.15)/ 337.26 )+ 1.3 *( 64.1 -T)+ 1.3 *(T+273.15)*log((T+273.15)/ 337.26 )
GCA_000962805apn1.pdbA:Delta G(T) = -87.5 *(1-(T+273.15)/ 340.01 )+ 1.16 *( 66.9 -T)+ 1.16 *(T+273.15)*log((T+273.15)/ 340.01 )
GCA_001046895apn1.pdbA:Delta G(T) = -87.8 *(1-(T+273.15)/ 337.84 )+ 1.26 *( 64.7 -T)+ 1.26 *(T+273.15)*log((T+273.15)/ 337.84 )
GCA_001187915apn1.pdbA:Delta G(T) = -83.7 *(1-(T+273.15)/ 344.62 )+ 1.49 *( 71.5 -T)+ 1.49 *(T+273.15)*log((T+273.15)/ 344.62 )
GCA_001238605apn1.pdbA:Delta G(T) = -87.3 *(1-(T+273.15)/ 339.39 )+ 0.98 *( 66.2 -T)+ 0.98 *(T+273.15)*log((T+273.15)/ 339.39 )
GCA_001281315apn1.pdbA:Delta G(T) = -92 *(1-(T+273.15)/ 340.38 )+ 1.29 *( 67.2 -T)+ 1.29 *(T+273.15)*log((T+273.15)/ 340.38 )
GCA_001294625apn1.pdbA:Delta G(T) = -86.2 *(1-(T+273.15)/ 340.97 )+ 1.55 *( 67.8 -T)+ 1.55 *(T+273.15)*log((T+273.15)/ 340.97 )
GCA_001307035apn1.pdbA:Delta G(T) = -85.6 *(1-(T+273.15)/ 339.43 )+ 1.69 *( 66.3 -T)+ 1.69 *(T+273.15)*log((T+273.15)/ 339.43 )
GCA_001373495apn1.pdbA:Delta G(T) = -86.6 *(1-(T+273.15)/ 338.33 )+ 1.52 *( 65.2 -T)+ 1.52 *(T+273.15)*log((T+273.15)/ 338.33 )
GCA_001422645apn1.pdbA:Delta G(T) = -78.6 *(1-(T+273.15)/ 340.93 )+ 1.24 *( 67.8 -T)+ 1.24 *(T+273.15)*log((T+273.15)/ 340.93 )
GCA_001422665apn1.pdbA:Delta G(T) = -76.3 *(1-(T+273.15)/ 340.05 )+ 0.87 *( 66.9 -T)+ 0.87 *(T+273.15)*log((T+273.15)/ 340.05 )
GCA_001423525apn1.pdbA:Delta G(T) = -86.9 *(1-(T+273.15)/ 339.98 )+ 1.19 *( 66.8 -T)+ 1.19 *(T+273.15)*log((T+273.15)/ 339.98 )
GCA_001423745apn1.pdbA:Delta G(T) = -83.4 *(1-(T+273.15)/ 337.69 )+ 1.25 *( 64.5 -T)+ 1.25 *(T+273.15)*log((T+273.15)/ 337.69 )
GCA_001424565apn1.pdbA:Delta G(T) = -87.9 *(1-(T+273.15)/ 340.05 )+ 1.21 *( 66.9 -T)+ 1.21 *(T+273.15)*log((T+273.15)/ 340.05 )
GCA_001428005apn1.pdbA:Delta G(T) = -86.8 *(1-(T+273.15)/ 342.62 )+ 1.65 *( 69.5 -T)+ 1.65 *(T+273.15)*log((T+273.15)/ 342.62 )
GCA_001428075apn1.pdbA:Delta G(T) = -84.4 *(1-(T+273.15)/ 339.32 )+ 1.35 *( 66.2 -T)+ 1.35 *(T+273.15)*log((T+273.15)/ 339.32 )
GCA_001428325apn1.pdbA:Delta G(T) = -83.1 *(1-(T+273.15)/ 339.52 )+ 1.26 *( 66.4 -T)+ 1.26 *(T+273.15)*log((T+273.15)/ 339.52 )
GCA_001428335apn1.pdbA:Delta G(T) = -86.5 *(1-(T+273.15)/ 341.87 )+ 1.39 *( 68.7 -T)+ 1.39 *(T+273.15)*log((T+273.15)/ 341.87 )
GCA_001428365apn1.pdbA:Delta G(T) = -84 *(1-(T+273.15)/ 340.97 )+ 1.23 *( 67.8 -T)+ 1.23 *(T+273.15)*log((T+273.15)/ 340.97 )
GCA_001428435apn1.pdbA:Delta G(T) = -85.5 *(1-(T+273.15)/ 341.24 )+ 1.24 *( 68.1 -T)+ 1.24 *(T+273.15)*log((T+273.15)/ 341.24 )
GCA_001445575apn1.pdbA:Delta G(T) = -90.9 *(1-(T+273.15)/ 339.62 )+ 1.24 *( 66.5 -T)+ 1.24 *(T+273.15)*log((T+273.15)/ 339.62 )
GCA_001457025apn1.pdbA:Delta G(T) = -87.4 *(1-(T+273.15)/ 341.26 )+ 1.19 *( 68.1 -T)+ 1.19 *(T+273.15)*log((T+273.15)/ 341.26 )
GCA_001512285apn1.pdbA:Delta G(T) = -90.2 *(1-(T+273.15)/ 340.61 )+ 1.43 *( 67.5 -T)+ 1.43 *(T+273.15)*log((T+273.15)/ 340.61 )
GCA_001512305apn1.pdbA:Delta G(T) = -86.2 *(1-(T+273.15)/ 339.67 )+ 1.33 *( 66.5 -T)+ 1.33 *(T+273.15)*log((T+273.15)/ 339.67 )
GCA_001542565apn1.pdbA:Delta G(T) = -88.9 *(1-(T+273.15)/ 340.66 )+ 1.5 *( 67.5 -T)+ 1.5 *(T+273.15)*log((T+273.15)/ 340.66 )
GCA_001552075apn1.pdbA:Delta G(T) = -85 *(1-(T+273.15)/ 337.51 )+ 1.48 *( 64.4 -T)+ 1.48 *(T+273.15)*log((T+273.15)/ 337.51 )
GCA_001641125apn1.pdbA:Delta G(T) = -90.4 *(1-(T+273.15)/ 338.92 )+ 1.48 *( 65.8 -T)+ 1.48 *(T+273.15)*log((T+273.15)/ 338.92 )
GCA_001663775apn1.pdbA:Delta G(T) = -88 *(1-(T+273.15)/ 341.06 )+ 1.36 *( 67.9 -T)+ 1.36 *(T+273.15)*log((T+273.15)/ 341.06 )
GCA_001750145apn1.pdbA:Delta G(T) = -87.3 *(1-(T+273.15)/ 339.58 )+ 1.53 *( 66.4 -T)+ 1.53 *(T+273.15)*log((T+273.15)/ 339.58 )
GCA_001766675apn1.pdbA:Delta G(T) = -86.5 *(1-(T+273.15)/ 343.28 )+ 1.34 *( 70.1 -T)+ 1.34 *(T+273.15)*log((T+273.15)/ 343.28 )
GCA_001854365apn1.pdbA:Delta G(T) = -88.9 *(1-(T+273.15)/ 340.66 )+ 1.5 *( 67.5 -T)+ 1.5 *(T+273.15)*log((T+273.15)/ 340.66 )
GCA_001969265apn1.pdbA:Delta G(T) = -84.3 *(1-(T+273.15)/ 343.57 )+ 1.41 *( 70.4 -T)+ 1.41 *(T+273.15)*log((T+273.15)/ 343.57 )
GCA_002008315apn1.pdbA:Delta G(T) = -87.5 *(1-(T+273.15)/ 342.6 )+ 1.4 *( 69.5 -T)+ 1.4 *(T+273.15)*log((T+273.15)/ 342.6 )
GCA_002157505apn1.pdbA:Delta G(T) = -83.1 *(1-(T+273.15)/ 342.19 )+ 1.15 *( 69 -T)+ 1.15 *(T+273.15)*log((T+273.15)/ 342.19 )
GCA_002157565apn1.pdbA:Delta G(T) = -77 *(1-(T+273.15)/ 340.5 )+ 1.14 *( 67.3 -T)+ 1.14 *(T+273.15)*log((T+273.15)/ 340.5 )
GCA_002224285apn1.pdbA:Delta G(T) = -87.8 *(1-(T+273.15)/ 341.62 )+ 1.39 *( 68.5 -T)+ 1.39 *(T+273.15)*log((T+273.15)/ 341.62 )
GCA_002849715apn1.pdbA:Delta G(T) = -85 *(1-(T+273.15)/ 342.21 )+ 0.95 *( 69.1 -T)+ 0.95 *(T+273.15)*log((T+273.15)/ 342.21 )
GCA_002892795apn1.pdbA:Delta G(T) = -85.3 *(1-(T+273.15)/ 342.54 )+ 1.47 *( 69.4 -T)+ 1.47 *(T+273.15)*log((T+273.15)/ 342.54 )
GCA_002892835apn1.pdbA:Delta G(T) = -83.3 *(1-(T+273.15)/ 339.44 )+ 1.3 *( 66.3 -T)+ 1.3 *(T+273.15)*log((T+273.15)/ 339.44 )
GCA_002909415apn1.pdbA:Delta G(T) = -92.1 *(1-(T+273.15)/ 342.13 )+ 1.53 *( 69 -T)+ 1.53 *(T+273.15)*log((T+273.15)/ 342.13 )
GCA_002929215apn1.pdbA:Delta G(T) = -87.6 *(1-(T+273.15)/ 338.33 )+ 1.44 *( 65.2 -T)+ 1.44 *(T+273.15)*log((T+273.15)/ 338.33 )
GCA_002929255apn1.pdbA:Delta G(T) = -86.8 *(1-(T+273.15)/ 338.33 )+ 1.25 *( 65.2 -T)+ 1.25 *(T+273.15)*log((T+273.15)/ 338.33 )
GCA_002929275apn1.pdbA:Delta G(T) = -86.8 *(1-(T+273.15)/ 338.33 )+ 1.25 *( 65.2 -T)+ 1.25 *(T+273.15)*log((T+273.15)/ 338.33 )
GCA_002929295apn1.pdbA:Delta G(T) = -85 *(1-(T+273.15)/ 341.36 )+ 1.24 *( 68.2 -T)+ 1.24 *(T+273.15)*log((T+273.15)/ 341.36 )
GCA_002929305apn1.pdbA:Delta G(T) = -83.5 *(1-(T+273.15)/ 341.15 )+ 1.26 *( 68 -T)+ 1.26 *(T+273.15)*log((T+273.15)/ 341.15 )
GCA_002929335apn1.pdbA:Delta G(T) = -84.7 *(1-(T+273.15)/ 336.5 )+ 1.3 *( 63.4 -T)+ 1.3 *(T+273.15)*log((T+273.15)/ 336.5 )
GCA_002929355apn1.pdbA:Delta G(T) = -77.1 *(1-(T+273.15)/ 342.96 )+ 0.94 *( 69.8 -T)+ 0.94 *(T+273.15)*log((T+273.15)/ 342.96 )
GCA_002929375apn1.pdbA:Delta G(T) = -78.8 *(1-(T+273.15)/ 342.71 )+ 1.05 *( 69.6 -T)+ 1.05 *(T+273.15)*log((T+273.15)/ 342.71 )
GCA_002929385apn1.pdbA:Delta G(T) = -86.8 *(1-(T+273.15)/ 338.33 )+ 1.25 *( 65.2 -T)+ 1.25 *(T+273.15)*log((T+273.15)/ 338.33 )
GCA_002929455apn1.pdbA:Delta G(T) = -85.9 *(1-(T+273.15)/ 338.15 )+ 1.27 *( 65 -T)+ 1.27 *(T+273.15)*log((T+273.15)/ 338.15 )
GCA_002929705apn1.pdbA:Delta G(T) = -88.7 *(1-(T+273.15)/ 339.56 )+ 1.23 *( 66.4 -T)+ 1.23 *(T+273.15)*log((T+273.15)/ 339.56 )
GCA_002929745apn1.pdbA:Delta G(T) = -82.2 *(1-(T+273.15)/ 342.4 )+ 1.3 *( 69.2 -T)+ 1.3 *(T+273.15)*log((T+273.15)/ 342.4 )
GCA_002929755apn1.pdbA:Delta G(T) = -91 *(1-(T+273.15)/ 340.77 )+ 1.58 *( 67.6 -T)+ 1.58 *(T+273.15)*log((T+273.15)/ 340.77 )
GCA_002934405apn1.pdbA:Delta G(T) = -84.1 *(1-(T+273.15)/ 338.96 )+ 1.14 *( 65.8 -T)+ 1.14 *(T+273.15)*log((T+273.15)/ 338.96 )
GCA_002953935apn1.pdbA:Delta G(T) = -89.7 *(1-(T+273.15)/ 338.82 )+ 1.47 *( 65.7 -T)+ 1.47 *(T+273.15)*log((T+273.15)/ 338.82 )
GCA_002954225apn1.pdbA:Delta G(T) = -84.6 *(1-(T+273.15)/ 340.77 )+ 1.26 *( 67.6 -T)+ 1.26 *(T+273.15)*log((T+273.15)/ 340.77 )
GCA_003097355apn1.pdbA:Delta G(T) = -84.6 *(1-(T+273.15)/ 339.92 )+ 1.1 *( 66.8 -T)+ 1.1 *(T+273.15)*log((T+273.15)/ 339.92 )
GCA_003116525apn1.pdbA:Delta G(T) = -80.8 *(1-(T+273.15)/ 340.18 )+ 1.37 *( 67 -T)+ 1.37 *(T+273.15)*log((T+273.15)/ 340.18 )
GCA_003185915apn1.pdbA:Delta G(T) = -89.4 *(1-(T+273.15)/ 340.84 )+ 1.28 *( 67.7 -T)+ 1.28 *(T+273.15)*log((T+273.15)/ 340.84 )
GCA_003208335apn1.pdbA:Delta G(T) = -83.3 *(1-(T+273.15)/ 339.4 )+ 1.24 *( 66.3 -T)+ 1.24 *(T+273.15)*log((T+273.15)/ 339.4 )
GCA_003219795apn1.pdbA:Delta G(T) = -87.7 *(1-(T+273.15)/ 341.34 )+ 1.26 *( 68.2 -T)+ 1.26 *(T+273.15)*log((T+273.15)/ 341.34 )
GCA_003219815apn1.pdbA:Delta G(T) = -91.3 *(1-(T+273.15)/ 339.54 )+ 1.68 *( 66.4 -T)+ 1.68 *(T+273.15)*log((T+273.15)/ 339.54 )
GCA_003268655apn1.pdbA:Delta G(T) = -89.8 *(1-(T+273.15)/ 336.06 )+ 1.52 *( 62.9 -T)+ 1.52 *(T+273.15)*log((T+273.15)/ 336.06 )
GCA_003287955apn1.pdbA:Delta G(T) = -90.5 *(1-(T+273.15)/ 341.09 )+ 1.49 *( 67.9 -T)+ 1.49 *(T+273.15)*log((T+273.15)/ 341.09 )
GCA_900016675apn1.pdbA:Delta G(T) = -82.6 *(1-(T+273.15)/ 337.61 )+ 1.27 *( 64.5 -T)+ 1.27 *(T+273.15)*log((T+273.15)/ 337.61 )
GCA_900099735apn1.pdbA:Delta G(T) = -84.9 *(1-(T+273.15)/ 341.79 )+ 1.24 *( 68.6 -T)+ 1.24 *(T+273.15)*log((T+273.15)/ 341.79 )
GCA_900099975apn1.pdbA:Delta G(T) = -87.4 *(1-(T+273.15)/ 342.59 )+ 1.45 *( 69.4 -T)+ 1.45 *(T+273.15)*log((T+273.15)/ 342.59 )
GCA_900102785apn1.pdbA:Delta G(T) = -82.6 *(1-(T+273.15)/ 339.39 )+ 1.27 *( 66.2 -T)+ 1.27 *(T+273.15)*log((T+273.15)/ 339.39 )
GCA_900102805apn1.pdbA:Delta G(T) = -88.2 *(1-(T+273.15)/ 341.48 )+ 1.36 *( 68.3 -T)+ 1.36 *(T+273.15)*log((T+273.15)/ 341.48 )
GCA_900102895apn1.pdbA:Delta G(T) = -83 *(1-(T+273.15)/ 339.94 )+ 1.31 *( 66.8 -T)+ 1.31 *(T+273.15)*log((T+273.15)/ 339.94 )
GCA_900104405apn1.pdbA:Delta G(T) = -84.2 *(1-(T+273.15)/ 340.02 )+ 1.25 *( 66.9 -T)+ 1.25 *(T+273.15)*log((T+273.15)/ 340.02 )
GCA_900105345apn1.pdbA:Delta G(T) = -78.7 *(1-(T+273.15)/ 340 )+ 1.12 *( 66.9 -T)+ 1.12 *(T+273.15)*log((T+273.15)/ 340 )
GCA_900105535apn1.pdbA:Delta G(T) = -88 *(1-(T+273.15)/ 339.83 )+ 1.18 *( 66.7 -T)+ 1.18 *(T+273.15)*log((T+273.15)/ 339.83 )
GCA_900105965apn1.pdbA:Delta G(T) = -91.1 *(1-(T+273.15)/ 342.03 )+ 1.53 *( 68.9 -T)+ 1.53 *(T+273.15)*log((T+273.15)/ 342.03 )
GCA_900106835apn1.pdbA:Delta G(T) = -90.2 *(1-(T+273.15)/ 340.34 )+ 1.33 *( 67.2 -T)+ 1.33 *(T+273.15)*log((T+273.15)/ 340.34 )
GCA_900110595apn1.pdbA:Delta G(T) = -90.7 *(1-(T+273.15)/ 338.11 )+ 1.47 *( 65 -T)+ 1.47 *(T+273.15)*log((T+273.15)/ 338.11 )
GCA_900116495apn1.pdbA:Delta G(T) = -84.4 *(1-(T+273.15)/ 339.15 )+ 1.35 *( 66 -T)+ 1.35 *(T+273.15)*log((T+273.15)/ 339.15 )
GCA_900168135apn1.pdbA:Delta G(T) = -81.9 *(1-(T+273.15)/ 339.01 )+ 1.27 *( 65.9 -T)+ 1.27 *(T+273.15)*log((T+273.15)/ 339.01 )
GCA_900168225apn1.pdbA:Delta G(T) = -92.5 *(1-(T+273.15)/ 340.59 )+ 1.26 *( 67.4 -T)+ 1.26 *(T+273.15)*log((T+273.15)/ 340.59 )
GCA_000014925apn1.pdbA:Delta G(T) = -89 *(1-(T+273.15)/ 341.19 )+ 1.46 *( 68 -T)+ 1.46 *(T+273.15)*log((T+273.15)/ 341.19 )
GCA_000022025apn1.pdbA:Delta G(T) = -88.4 *(1-(T+273.15)/ 339.51 )+ 1.19 *( 66.4 -T)+ 1.19 *(T+273.15)*log((T+273.15)/ 339.51 )
GCA_000189535apn1.pdbA:Delta G(T) = -87.4 *(1-(T+273.15)/ 339.02 )+ 1.26 *( 65.9 -T)+ 1.26 *(T+273.15)*log((T+273.15)/ 339.02 )
GCA_000196235apn1.pdbA:Delta G(T) = -84.7 *(1-(T+273.15)/ 337.24 )+ 1.2 *( 64.1 -T)+ 1.2 *(T+273.15)*log((T+273.15)/ 337.24 )
GCA_000238915apn1.pdbA:Delta G(T) = -85.2 *(1-(T+273.15)/ 343.25 )+ 1.47 *( 70.1 -T)+ 1.47 *(T+273.15)*log((T+273.15)/ 343.25 )
GCA_000281065apn1.pdbA:Delta G(T) = -89.8 *(1-(T+273.15)/ 340.49 )+ 1.38 *( 67.3 -T)+ 1.38 *(T+273.15)*log((T+273.15)/ 340.49 )
GCA_000294595apn1.pdbA:Delta G(T) = -83.6 *(1-(T+273.15)/ 340.19 )+ 1.21 *( 67 -T)+ 1.21 *(T+273.15)*log((T+273.15)/ 340.19 )
GCA_000294695apn1.pdbA:Delta G(T) = -89 *(1-(T+273.15)/ 341.19 )+ 1.46 *( 68 -T)+ 1.46 *(T+273.15)*log((T+273.15)/ 341.19 )
GCA_000332815apn1.pdbA:Delta G(T) = -88.1 *(1-(T+273.15)/ 340.02 )+ 1.39 *( 66.9 -T)+ 1.39 *(T+273.15)*log((T+273.15)/ 340.02 )
GCA_000374865apn1.pdbA:Delta G(T) = -81.2 *(1-(T+273.15)/ 340.14 )+ 1.34 *( 67 -T)+ 1.34 *(T+273.15)*log((T+273.15)/ 340.14 )
GCA_000374905apn1.pdbA:Delta G(T) = -82.3 *(1-(T+273.15)/ 338.81 )+ 1.11 *( 65.7 -T)+ 1.11 *(T+273.15)*log((T+273.15)/ 338.81 )
GCA_000374925apn1.pdbA:Delta G(T) = -85.8 *(1-(T+273.15)/ 339.49 )+ 1.57 *( 66.3 -T)+ 1.57 *(T+273.15)*log((T+273.15)/ 339.49 )
GCA_000374945aspS.pdbA:Delta G(T) = -173.8 *(1-(T+273.15)/ 338.03 )+ 2.14 *( 64.9 -T)+ 2.14 *(T+273.15)*log((T+273.15)/ 338.03 )
GCA_000468215aspS.pdbA:Delta G(T) = -165.4 *(1-(T+273.15)/ 332.75 )+ 2.22 *( 59.6 -T)+ 2.22 *(T+273.15)*log((T+273.15)/ 332.75 )
GCA_000482545aspS.pdbA:Delta G(T) = -176.8 *(1-(T+273.15)/ 335.07 )+ 2.56 *( 61.9 -T)+ 2.56 *(T+273.15)*log((T+273.15)/ 335.07 )
GCA_000514015aspS.pdbA:Delta G(T) = -170.2 *(1-(T+273.15)/ 337.91 )+ 2.14 *( 64.8 -T)+ 2.14 *(T+273.15)*log((T+273.15)/ 337.91 )
GCA_000514155aspS.pdbA:Delta G(T) = -170.2 *(1-(T+273.15)/ 338.04 )+ 2.14 *( 64.9 -T)+ 2.14 *(T+273.15)*log((T+273.15)/ 338.04 )
GCA_000517125aspS.pdbA:Delta G(T) = -172.6 *(1-(T+273.15)/ 337.9 )+ 2.19 *( 64.7 -T)+ 2.19 *(T+273.15)*log((T+273.15)/ 337.9 )
GCA_000520555aspS.pdbA:Delta G(T) = -130.4 *(1-(T+273.15)/ 344.37 )+ 2.37 *( 71.2 -T)+ 2.37 *(T+273.15)*log((T+273.15)/ 344.37 )
GCA_000520575aspS.pdbA:Delta G(T) = -130.4 *(1-(T+273.15)/ 344.37 )+ 2.37 *( 71.2 -T)+ 2.37 *(T+273.15)*log((T+273.15)/ 344.37 )
GCA_000520595aspS.pdbA:Delta G(T) = -83.4 *(1-(T+273.15)/ 340.09 )+ 2.32 *( 66.9 -T)+ 2.32 *(T+273.15)*log((T+273.15)/ 340.09 )
GCA_000620385aspS.pdbA:Delta G(T) = -155.8 *(1-(T+273.15)/ 330.94 )+ 1.16 *( 57.8 -T)+ 1.16 *(T+273.15)*log((T+273.15)/ 330.94 )
GCA_000685965aspS.pdbA:Delta G(T) = -188.3 *(1-(T+273.15)/ 340.77 )+ 2.82 *( 67.6 -T)+ 2.82 *(T+273.15)*log((T+273.15)/ 340.77 )
GCA_000755585aspS.pdbA:Delta G(T) = -160.7 *(1-(T+273.15)/ 336.17 )+ 2.59 *( 63 -T)+ 2.59 *(T+273.15)*log((T+273.15)/ 336.17 )
GCA_000785535aspS.pdbA:Delta G(T) = -178.2 *(1-(T+273.15)/ 336.16 )+ 2.52 *( 63 -T)+ 2.52 *(T+273.15)*log((T+273.15)/ 336.16 )
GCA_000813845aspS.pdbA:Delta G(T) = -179.4 *(1-(T+273.15)/ 334.65 )+ 1.56 *( 61.5 -T)+ 1.56 *(T+273.15)*log((T+273.15)/ 334.65 )
GCA_000816565aspS.pdbA:Delta G(T) = -174.6 *(1-(T+273.15)/ 336.86 )+ 2 *( 63.7 -T)+ 2 *(T+273.15)*log((T+273.15)/ 336.86 )
GCA_000876655aspS.pdbA:Delta G(T) = -128.6 *(1-(T+273.15)/ 339.24 )+ 1.61 *( 66.1 -T)+ 1.61 *(T+273.15)*log((T+273.15)/ 339.24 )
GCA_000962805aspS.pdbA:Delta G(T) = -189.1 *(1-(T+273.15)/ 336.8 )+ 2.27 *( 63.6 -T)+ 2.27 *(T+273.15)*log((T+273.15)/ 336.8 )
GCA_001046895aspS.pdbA:Delta G(T) = -167.5 *(1-(T+273.15)/ 340.89 )+ 2.6 *( 67.7 -T)+ 2.6 *(T+273.15)*log((T+273.15)/ 340.89 )
GCA_001187915aspS.pdbA:Delta G(T) = -181.9 *(1-(T+273.15)/ 337.51 )+ 2.31 *( 64.4 -T)+ 2.31 *(T+273.15)*log((T+273.15)/ 337.51 )
GCA_001238605aspS.pdbA:Delta G(T) = -122.6 *(1-(T+273.15)/ 341.95 )+ 2.25 *( 68.8 -T)+ 2.25 *(T+273.15)*log((T+273.15)/ 341.95 )
GCA_001281315aspS.pdbA:Delta G(T) = -117.1 *(1-(T+273.15)/ 341.53 )+ 1.8 *( 68.4 -T)+ 1.8 *(T+273.15)*log((T+273.15)/ 341.53 )
GCA_001294625aspS.pdbA:Delta G(T) = -174.8 *(1-(T+273.15)/ 337.3 )+ 2.83 *( 64.2 -T)+ 2.83 *(T+273.15)*log((T+273.15)/ 337.3 )
GCA_001307035aspS.pdbA:Delta G(T) = -173.6 *(1-(T+273.15)/ 334.28 )+ 2.22 *( 61.1 -T)+ 2.22 *(T+273.15)*log((T+273.15)/ 334.28 )
GCA_001373495aspS.pdbA:Delta G(T) = -173.1 *(1-(T+273.15)/ 335.19 )+ 2.41 *( 62 -T)+ 2.41 *(T+273.15)*log((T+273.15)/ 335.19 )
GCA_001422645aspS.pdbA:Delta G(T) = -122.4 *(1-(T+273.15)/ 341.86 )+ 1.73 *( 68.7 -T)+ 1.73 *(T+273.15)*log((T+273.15)/ 341.86 )
GCA_001422665aspS.pdbA:Delta G(T) = -182.6 *(1-(T+273.15)/ 337.43 )+ 1.86 *( 64.3 -T)+ 1.86 *(T+273.15)*log((T+273.15)/ 337.43 )
GCA_001423525aspS.pdbA:Delta G(T) = -193.5 *(1-(T+273.15)/ 335.61 )+ 2.26 *( 62.5 -T)+ 2.26 *(T+273.15)*log((T+273.15)/ 335.61 )
GCA_001423745aspS.pdbA:Delta G(T) = -185.2 *(1-(T+273.15)/ 341.09 )+ 2.82 *( 67.9 -T)+ 2.82 *(T+273.15)*log((T+273.15)/ 341.09 )
GCA_001424565aspS.pdbA:Delta G(T) = -168.2 *(1-(T+273.15)/ 340.99 )+ 2.97 *( 67.8 -T)+ 2.97 *(T+273.15)*log((T+273.15)/ 340.99 )
GCA_001428005aspS.pdbA:Delta G(T) = -195.3 *(1-(T+273.15)/ 338.4 )+ 2.54 *( 65.3 -T)+ 2.54 *(T+273.15)*log((T+273.15)/ 338.4 )
GCA_001428075aspS.pdbA:Delta G(T) = -186.6 *(1-(T+273.15)/ 336.62 )+ 2.32 *( 63.5 -T)+ 2.32 *(T+273.15)*log((T+273.15)/ 336.62 )
GCA_001428325aspS.pdbA:Delta G(T) = -138.2 *(1-(T+273.15)/ 339.5 )+ 1.76 *( 66.3 -T)+ 1.76 *(T+273.15)*log((T+273.15)/ 339.5 )
GCA_001428335aspS.pdbA:Delta G(T) = -164 *(1-(T+273.15)/ 339.86 )+ 2.32 *( 66.7 -T)+ 2.32 *(T+273.15)*log((T+273.15)/ 339.86 )
GCA_001428365aspS.pdbA:Delta G(T) = -174 *(1-(T+273.15)/ 337.17 )+ 1.88 *( 64 -T)+ 1.88 *(T+273.15)*log((T+273.15)/ 337.17 )
GCA_001428435aspS.pdbA:Delta G(T) = -121.2 *(1-(T+273.15)/ 344.3 )+ 2.47 *( 71.1 -T)+ 2.47 *(T+273.15)*log((T+273.15)/ 344.3 )
GCA_001445575aspS.pdbA:Delta G(T) = -154.5 *(1-(T+273.15)/ 336.6 )+ 2.26 *( 63.4 -T)+ 2.26 *(T+273.15)*log((T+273.15)/ 336.6 )
GCA_001457025aspS.pdbA:Delta G(T) = -134.2 *(1-(T+273.15)/ 341.78 )+ 1.73 *( 68.6 -T)+ 1.73 *(T+273.15)*log((T+273.15)/ 341.78 )
GCA_001512285aspS.pdbA:Delta G(T) = -164.4 *(1-(T+273.15)/ 338.35 )+ 2.34 *( 65.2 -T)+ 2.34 *(T+273.15)*log((T+273.15)/ 338.35 )
GCA_001512305aspS.pdbA:Delta G(T) = -182.7 *(1-(T+273.15)/ 337.46 )+ 2.22 *( 64.3 -T)+ 2.22 *(T+273.15)*log((T+273.15)/ 337.46 )
GCA_001542565aspS.pdbA:Delta G(T) = -176.2 *(1-(T+273.15)/ 337.83 )+ 1.82 *( 64.7 -T)+ 1.82 *(T+273.15)*log((T+273.15)/ 337.83 )
GCA_001552075aspS.pdbA:Delta G(T) = -161.8 *(1-(T+273.15)/ 336.7 )+ 2.06 *( 63.6 -T)+ 2.06 *(T+273.15)*log((T+273.15)/ 336.7 )
GCA_001641125aspS.pdbA:Delta G(T) = -149.9 *(1-(T+273.15)/ 339.66 )+ 2.62 *( 66.5 -T)+ 2.62 *(T+273.15)*log((T+273.15)/ 339.66 )
GCA_001663775aspS.pdbA:Delta G(T) = -167.9 *(1-(T+273.15)/ 339.24 )+ 2.15 *( 66.1 -T)+ 2.15 *(T+273.15)*log((T+273.15)/ 339.24 )
GCA_001750145aspS.pdbA:Delta G(T) = -172.7 *(1-(T+273.15)/ 337.39 )+ 2.32 *( 64.2 -T)+ 2.32 *(T+273.15)*log((T+273.15)/ 337.39 )
GCA_001766675aspS.pdbA:Delta G(T) = -113.4 *(1-(T+273.15)/ 340.92 )+ 1.35 *( 67.8 -T)+ 1.35 *(T+273.15)*log((T+273.15)/ 340.92 )
GCA_001854365aspS.pdbA:Delta G(T) = -178.6 *(1-(T+273.15)/ 338.08 )+ 1.87 *( 64.9 -T)+ 1.87 *(T+273.15)*log((T+273.15)/ 338.08 )
GCA_001969265aspS.pdbA:Delta G(T) = -188.1 *(1-(T+273.15)/ 336.29 )+ 2.36 *( 63.1 -T)+ 2.36 *(T+273.15)*log((T+273.15)/ 336.29 )
GCA_002008315aspS.pdbA:Delta G(T) = -163.8 *(1-(T+273.15)/ 336.39 )+ 1.24 *( 63.2 -T)+ 1.24 *(T+273.15)*log((T+273.15)/ 336.39 )
GCA_002157505aspS.pdbA:Delta G(T) = -183.1 *(1-(T+273.15)/ 337.47 )+ 2.69 *( 64.3 -T)+ 2.69 *(T+273.15)*log((T+273.15)/ 337.47 )
GCA_002157565aspS.pdbA:Delta G(T) = -181.3 *(1-(T+273.15)/ 338.42 )+ 2.29 *( 65.3 -T)+ 2.29 *(T+273.15)*log((T+273.15)/ 338.42 )
GCA_002224285aspS.pdbA:Delta G(T) = -166.3 *(1-(T+273.15)/ 338.43 )+ 1.97 *( 65.3 -T)+ 1.97 *(T+273.15)*log((T+273.15)/ 338.43 )
GCA_002849715aspS.pdbA:Delta G(T) = -127.3 *(1-(T+273.15)/ 342.65 )+ 1.88 *( 69.5 -T)+ 1.88 *(T+273.15)*log((T+273.15)/ 342.65 )
GCA_002892795aspS.pdbA:Delta G(T) = -185.3 *(1-(T+273.15)/ 336.45 )+ 2.46 *( 63.3 -T)+ 2.46 *(T+273.15)*log((T+273.15)/ 336.45 )
GCA_002892835aspS.pdbA:Delta G(T) = -161.6 *(1-(T+273.15)/ 340.66 )+ 2.51 *( 67.5 -T)+ 2.51 *(T+273.15)*log((T+273.15)/ 340.66 )
GCA_002909415aspS.pdbA:Delta G(T) = -159.9 *(1-(T+273.15)/ 340.26 )+ 2.4 *( 67.1 -T)+ 2.4 *(T+273.15)*log((T+273.15)/ 340.26 )
GCA_002929215aspS.pdbA:Delta G(T) = -160.9 *(1-(T+273.15)/ 339.71 )+ 2.26 *( 66.6 -T)+ 2.26 *(T+273.15)*log((T+273.15)/ 339.71 )
GCA_002929255aspS.pdbA:Delta G(T) = -112.4 *(1-(T+273.15)/ 337.76 )+ 1.6 *( 64.6 -T)+ 1.6 *(T+273.15)*log((T+273.15)/ 337.76 )
GCA_002929275aspS.pdbA:Delta G(T) = -112.4 *(1-(T+273.15)/ 337.76 )+ 1.6 *( 64.6 -T)+ 1.6 *(T+273.15)*log((T+273.15)/ 337.76 )
GCA_002929295aspS.pdbA:Delta G(T) = -127.6 *(1-(T+273.15)/ 343.97 )+ 1.89 *( 70.8 -T)+ 1.89 *(T+273.15)*log((T+273.15)/ 343.97 )
GCA_002929305aspS.pdbA:Delta G(T) = -154.9 *(1-(T+273.15)/ 338.86 )+ 2.48 *( 65.7 -T)+ 2.48 *(T+273.15)*log((T+273.15)/ 338.86 )
GCA_002929335aspS.pdbA:Delta G(T) = -183.2 *(1-(T+273.15)/ 337.03 )+ 2.27 *( 63.9 -T)+ 2.27 *(T+273.15)*log((T+273.15)/ 337.03 )
GCA_002929355aspS.pdbA:Delta G(T) = -175.5 *(1-(T+273.15)/ 336.01 )+ 1.68 *( 62.9 -T)+ 1.68 *(T+273.15)*log((T+273.15)/ 336.01 )
GCA_002929375aspS.pdbA:Delta G(T) = -165.2 *(1-(T+273.15)/ 337.47 )+ 1.44 *( 64.3 -T)+ 1.44 *(T+273.15)*log((T+273.15)/ 337.47 )
GCA_002929385aspS.pdbA:Delta G(T) = -171.6 *(1-(T+273.15)/ 335.27 )+ 2.4 *( 62.1 -T)+ 2.4 *(T+273.15)*log((T+273.15)/ 335.27 )
GCA_002929455aspS.pdbA:Delta G(T) = -171.6 *(1-(T+273.15)/ 335.27 )+ 2.4 *( 62.1 -T)+ 2.4 *(T+273.15)*log((T+273.15)/ 335.27 )
GCA_002929705aspS.pdbA:Delta G(T) = -157.7 *(1-(T+273.15)/ 336.24 )+ 2 *( 63.1 -T)+ 2 *(T+273.15)*log((T+273.15)/ 336.24 )
GCA_002929745aspS.pdbA:Delta G(T) = -171.8 *(1-(T+273.15)/ 337.62 )+ 1.63 *( 64.5 -T)+ 1.63 *(T+273.15)*log((T+273.15)/ 337.62 )
GCA_002929755aspS.pdbA:Delta G(T) = -163.3 *(1-(T+273.15)/ 338.76 )+ 2.06 *( 65.6 -T)+ 2.06 *(T+273.15)*log((T+273.15)/ 338.76 )
GCA_002934405aspS.pdbA:Delta G(T) = -140.6 *(1-(T+273.15)/ 340.06 )+ 2.23 *( 66.9 -T)+ 2.23 *(T+273.15)*log((T+273.15)/ 340.06 )
GCA_002953935aspS.pdbA:Delta G(T) = -167.6 *(1-(T+273.15)/ 339.15 )+ 1.99 *( 66 -T)+ 1.99 *(T+273.15)*log((T+273.15)/ 339.15 )
GCA_002954225aspS.pdbA:Delta G(T) = -180.9 *(1-(T+273.15)/ 339.25 )+ 2.23 *( 66.1 -T)+ 2.23 *(T+273.15)*log((T+273.15)/ 339.25 )
GCA_003097355aspS.pdbA:Delta G(T) = -100.5 *(1-(T+273.15)/ 336.61 )+ 0.33 *( 63.5 -T)+ 0.33 *(T+273.15)*log((T+273.15)/ 336.61 )
GCA_003116525aspS.pdbA:Delta G(T) = -193.2 *(1-(T+273.15)/ 336.06 )+ 2.26 *( 62.9 -T)+ 2.26 *(T+273.15)*log((T+273.15)/ 336.06 )
GCA_003185915aspS.pdbA:Delta G(T) = -176.6 *(1-(T+273.15)/ 336.34 )+ 2.57 *( 63.2 -T)+ 2.57 *(T+273.15)*log((T+273.15)/ 336.34 )
GCA_003208335aspS.pdbA:Delta G(T) = -182.3 *(1-(T+273.15)/ 334.22 )+ 2.11 *( 61.1 -T)+ 2.11 *(T+273.15)*log((T+273.15)/ 334.22 )
GCA_003219795aspS.pdbA:Delta G(T) = -156 *(1-(T+273.15)/ 337.55 )+ 2.42 *( 64.4 -T)+ 2.42 *(T+273.15)*log((T+273.15)/ 337.55 )
GCA_003219815aspS.pdbA:Delta G(T) = -179.1 *(1-(T+273.15)/ 337.57 )+ 2.78 *( 64.4 -T)+ 2.78 *(T+273.15)*log((T+273.15)/ 337.57 )
GCA_003268655aspS.pdbA:Delta G(T) = -190.8 *(1-(T+273.15)/ 338.28 )+ 2.44 *( 65.1 -T)+ 2.44 *(T+273.15)*log((T+273.15)/ 338.28 )
GCA_003287955aspS.pdbA:Delta G(T) = -163.5 *(1-(T+273.15)/ 338.41 )+ 2.11 *( 65.3 -T)+ 2.11 *(T+273.15)*log((T+273.15)/ 338.41 )
GCA_900016675aspS.pdbA:Delta G(T) = -177 *(1-(T+273.15)/ 334.03 )+ 2.43 *( 60.9 -T)+ 2.43 *(T+273.15)*log((T+273.15)/ 334.03 )
GCA_900099735aspS.pdbA:Delta G(T) = -182.6 *(1-(T+273.15)/ 337.97 )+ 2.66 *( 64.8 -T)+ 2.66 *(T+273.15)*log((T+273.15)/ 337.97 )
GCA_900099975aspS.pdbA:Delta G(T) = -164.7 *(1-(T+273.15)/ 336.86 )+ 2.18 *( 63.7 -T)+ 2.18 *(T+273.15)*log((T+273.15)/ 336.86 )
GCA_900102785aspS.pdbA:Delta G(T) = -181.4 *(1-(T+273.15)/ 336.54 )+ 2.11 *( 63.4 -T)+ 2.11 *(T+273.15)*log((T+273.15)/ 336.54 )
GCA_900102805aspS.pdbA:Delta G(T) = -170.2 *(1-(T+273.15)/ 338.04 )+ 2.14 *( 64.9 -T)+ 2.14 *(T+273.15)*log((T+273.15)/ 338.04 )
GCA_900102895aspS.pdbA:Delta G(T) = -186 *(1-(T+273.15)/ 336.14 )+ 2.35 *( 63 -T)+ 2.35 *(T+273.15)*log((T+273.15)/ 336.14 )
GCA_900104405aspS.pdbA:Delta G(T) = -184.3 *(1-(T+273.15)/ 337.87 )+ 2.47 *( 64.7 -T)+ 2.47 *(T+273.15)*log((T+273.15)/ 337.87 )
GCA_900105345aspS.pdbA:Delta G(T) = -172.9 *(1-(T+273.15)/ 338.32 )+ 1.89 *( 65.2 -T)+ 1.89 *(T+273.15)*log((T+273.15)/ 338.32 )
GCA_900105535aspS.pdbA:Delta G(T) = -192.9 *(1-(T+273.15)/ 336.5 )+ 2.36 *( 63.3 -T)+ 2.36 *(T+273.15)*log((T+273.15)/ 336.5 )
GCA_900105965aspS.pdbA:Delta G(T) = -118.2 *(1-(T+273.15)/ 339.59 )+ 1.58 *( 66.4 -T)+ 1.58 *(T+273.15)*log((T+273.15)/ 339.59 )
GCA_900106835aspS.pdbA:Delta G(T) = -169.4 *(1-(T+273.15)/ 336.81 )+ 1.91 *( 63.7 -T)+ 1.91 *(T+273.15)*log((T+273.15)/ 336.81 )
GCA_900110595aspS.pdbA:Delta G(T) = -161.5 *(1-(T+273.15)/ 337.63 )+ 1.36 *( 64.5 -T)+ 1.36 *(T+273.15)*log((T+273.15)/ 337.63 )
GCA_900116495aspS.pdbA:Delta G(T) = -117 *(1-(T+273.15)/ 338.72 )+ 0.25 *( 65.6 -T)+ 0.25 *(T+273.15)*log((T+273.15)/ 338.72 )
GCA_900168135aspS.pdbA:Delta G(T) = -129.3 *(1-(T+273.15)/ 338.79 )+ 1.66 *( 65.6 -T)+ 1.66 *(T+273.15)*log((T+273.15)/ 338.79 )
GCA_900168225aspS.pdbA:Delta G(T) = -173.8 *(1-(T+273.15)/ 338.03 )+ 2.14 *( 64.9 -T)+ 2.14 *(T+273.15)*log((T+273.15)/ 338.03 )
GCA_000014925aspS.pdbA:Delta G(T) = -167.7 *(1-(T+273.15)/ 338.77 )+ 1.88 *( 65.6 -T)+ 1.88 *(T+273.15)*log((T+273.15)/ 338.77 )
GCA_000022025aspS.pdbA:Delta G(T) = -136.2 *(1-(T+273.15)/ 338.51 )+ 1.86 *( 65.4 -T)+ 1.86 *(T+273.15)*log((T+273.15)/ 338.51 )
GCA_000189535aspS.pdbA:Delta G(T) = -154.1 *(1-(T+273.15)/ 341.62 )+ 2.47 *( 68.5 -T)+ 2.47 *(T+273.15)*log((T+273.15)/ 341.62 )
GCA_000196235aspS.pdbA:Delta G(T) = -178 *(1-(T+273.15)/ 338.36 )+ 2.2 *( 65.2 -T)+ 2.2 *(T+273.15)*log((T+273.15)/ 338.36 )
GCA_000238915aspS.pdbA:Delta G(T) = -130.6 *(1-(T+273.15)/ 339.34 )+ 1.67 *( 66.2 -T)+ 1.67 *(T+273.15)*log((T+273.15)/ 339.34 )
GCA_000281065aspS.pdbA:Delta G(T) = -113.2 *(1-(T+273.15)/ 340.44 )+ 0.9 *( 67.3 -T)+ 0.9 *(T+273.15)*log((T+273.15)/ 340.44 )
GCA_000294595aspS.pdbA:Delta G(T) = -165.4 *(1-(T+273.15)/ 332.75 )+ 2.22 *( 59.6 -T)+ 2.22 *(T+273.15)*log((T+273.15)/ 332.75 )
GCA_000294695aspS.pdbA:Delta G(T) = -170.7 *(1-(T+273.15)/ 337.8 )+ 1.79 *( 64.6 -T)+ 1.79 *(T+273.15)*log((T+273.15)/ 337.8 )
GCA_000332815aspS.pdbA:Delta G(T) = -139.3 *(1-(T+273.15)/ 343.13 )+ 2.12 *( 70 -T)+ 2.12 *(T+273.15)*log((T+273.15)/ 343.13 )
GCA_000374865aspS.pdbA:Delta G(T) = -194.9 *(1-(T+273.15)/ 335.52 )+ 1.96 *( 62.4 -T)+ 1.96 *(T+273.15)*log((T+273.15)/ 335.52 )
GCA_000374905aspS.pdbA:Delta G(T) = -138.2 *(1-(T+273.15)/ 339.5 )+ 1.76 *( 66.3 -T)+ 1.76 *(T+273.15)*log((T+273.15)/ 339.5 )
GCA_000374925aspS.pdbA:Delta G(T) = -151.7 *(1-(T+273.15)/ 331.25 )+ 1.34 *( 58.1 -T)+ 1.34 *(T+273.15)*log((T+273.15)/ 331.25 )
GCA_000014925.cdsA:Delta
GCA_000022025.cdsA:Delta
GCA_000189535.cdsA:Delta
GCA_000196235.cdsA:Delta
GCA_000238915.cdsA:Delta
GCA_000281065.cdsA:Delta
GCA_000294595.cdsA:Delta
GCA_000294695.cdsA:Delta
GCA_000332815.cdsA:Delta
GCA_000374865.cdsA:Delta
GCA_000374905.cdsA:Delta
GCA_000374925.cdsA:Delta
GCA_000374945.cdsA:Delta
GCA_000468215.cdsA:Delta
GCA_000482545.cdsA:Delta
GCA_000514015.cdsA:Delta
GCA_000514155.cdsA:Delta
GCA_000517125.cdsA:Delta
GCA_000520595.cdsA:Delta
GCA_000620385.cdsA:Delta
GCA_000685965.cdsA:Delta
GCA_000755585.cdsA:Delta
GCA_000785535.cdsA:Delta
GCA_000813845.cdsA:Delta
GCA_000816565.cdsA:Delta
GCA_000876655.cdsA:Delta
GCA_000962805.cdsA:Delta
GCA_001046895.cdsA:Delta
GCA_001187915.cdsA:Delta
GCA_001238605.cdsA:Delta
GCA_001281315.cdsA:Delta
GCA_001307035.cdsA:Delta
GCA_001373495.cdsA:Delta
GCA_001422645.cdsA:Delta
GCA_001422665.cdsA:Delta
GCA_001423525.cdsA:Delta
GCA_001423745.cdsA:Delta
GCA_001424565.cdsA:Delta
GCA_001428005.cdsA:Delta
GCA_001428075.cdsA:Delta
GCA_001428325.cdsA:Delta
GCA_001428335.cdsA:Delta
GCA_001428365.cdsA:Delta
GCA_001428435.cdsA:Delta
GCA_001445575.cdsA:Delta
GCA_001457025.cdsA:Delta
GCA_001512285.cdsA:Delta
GCA_001512305.cdsA:Delta
GCA_001542565.cdsA:Delta
GCA_001552075.cdsA:Delta
GCA_001641125.cdsA:Delta
GCA_001663775.cdsA:Delta
GCA_001750145.cdsA:Delta
GCA_001766675.cdsA:Delta
GCA_001854365.cdsA:Delta
GCA_001969265.cdsA:Delta
GCA_002008315.cdsA:Delta
GCA_002157505.cdsA:Delta
GCA_002157565.cdsA:Delta
GCA_002224285.cdsA:Delta
GCA_002849715.cdsA:Delta
GCA_002892795.cdsA:Delta
GCA_002892835.cdsA:Delta
GCA_002909415.cdsA:Delta
GCA_002929215.cdsA:Delta
GCA_002929255.cdsA:Delta
GCA_002929275.cdsA:Delta
GCA_002929295.cdsA:Delta
GCA_002929305.cdsA:Delta
GCA_002929335.cdsA:Delta
GCA_002929355.cdsA:Delta
GCA_002929375.cdsA:Delta
GCA_002929385.cdsA:Delta
GCA_002929455.cdsA:Delta
GCA_002929705.cdsA:Delta
GCA_002929745.cdsA:Delta
GCA_002929755.cdsA:Delta
GCA_002934405.cdsA:Delta
GCA_002953935.cdsA:Delta
GCA_002954225.cdsA:Delta
GCA_003097355.cdsA:Delta
GCA_003116525.cdsA:Delta
GCA_003185915.cdsA:Delta
GCA_003208335.cdsA:Delta
GCA_003219795.cdsA:Delta
GCA_003219815.cdsA:Delta
GCA_003268655.cdsA:Delta
GCA_003287955.cdsA:Delta
GCA_900016675.cdsA:Delta
GCA_900099735.cdsA:Delta
GCA_900099975.cdsA:Delta
GCA_900102785.cdsA:Delta
GCA_900102805.cdsA:Delta
GCA_900102895.cdsA:Delta
GCA_900104405.cdsA:Delta
GCA_900105345.cdsA:Delta
GCA_900105535.cdsA:Delta
GCA_900105965.cdsA:Delta
GCA_900106835.cdsA:Delta
GCA_900110595.cdsA:Delta
GCA_900116495.cdsA:Delta
GCA_900168135.cdsA:Delta
GCA_900168225.cdsA:Delta
GCA_000374945clpS.pdbA:Delta G(T) = -98.5 *(1-(T+273.15)/ 343.79 )+ 0.79 *( 70.6 -T)+ 0.79 *(T+273.15)*log((T+273.15)/ 343.79 )
GCA_000468215clpS.pdbA:Delta G(T) = -99.2 *(1-(T+273.15)/ 346.77 )+ 1.11 *( 73.6 -T)+ 1.11 *(T+273.15)*log((T+273.15)/ 346.77 )
GCA_000482545clpS.pdbA:Delta G(T) = -100.8 *(1-(T+273.15)/ 337.9 )+ 0.97 *( 64.7 -T)+ 0.97 *(T+273.15)*log((T+273.15)/ 337.9 )
GCA_000514015clpS.pdbA:Delta G(T) = -103.6 *(1-(T+273.15)/ 345.18 )+ 0.98 *( 72 -T)+ 0.98 *(T+273.15)*log((T+273.15)/ 345.18 )
GCA_000514155clpS.pdbA:Delta G(T) = -103.6 *(1-(T+273.15)/ 345.18 )+ 0.98 *( 72 -T)+ 0.98 *(T+273.15)*log((T+273.15)/ 345.18 )
GCA_000517125clpS.pdbA:Delta G(T) = -92.2 *(1-(T+273.15)/ 347.96 )+ 0.8 *( 74.8 -T)+ 0.8 *(T+273.15)*log((T+273.15)/ 347.96 )
GCA_000520555clpS.pdbA:Delta G(T) = -96.8 *(1-(T+273.15)/ 344.75 )+ 0.83 *( 71.6 -T)+ 0.83 *(T+273.15)*log((T+273.15)/ 344.75 )
GCA_000520575clpS.pdbA:Delta G(T) = -96.8 *(1-(T+273.15)/ 344.75 )+ 0.83 *( 71.6 -T)+ 0.83 *(T+273.15)*log((T+273.15)/ 344.75 )
GCA_000520595clpS.pdbA:Delta G(T) = -102.5 *(1-(T+273.15)/ 345.67 )+ 0.74 *( 72.5 -T)+ 0.74 *(T+273.15)*log((T+273.15)/ 345.67 )
GCA_000620385clpS.pdbA:Delta G(T) = -96.3 *(1-(T+273.15)/ 341.33 )+ 1.11 *( 68.2 -T)+ 1.11 *(T+273.15)*log((T+273.15)/ 341.33 )
GCA_000685965clpS.pdbA:Delta G(T) = -98.9 *(1-(T+273.15)/ 344.39 )+ 1.04 *( 71.2 -T)+ 1.04 *(T+273.15)*log((T+273.15)/ 344.39 )
GCA_000755585clpS.pdbA:Delta G(T) = -95.3 *(1-(T+273.15)/ 341.33 )+ 0.9 *( 68.2 -T)+ 0.9 *(T+273.15)*log((T+273.15)/ 341.33 )
GCA_000785535clpS.pdbA:Delta G(T) = -96.2 *(1-(T+273.15)/ 339.01 )+ 0.85 *( 65.9 -T)+ 0.85 *(T+273.15)*log((T+273.15)/ 339.01 )
GCA_000813845clpS.pdbA:Delta G(T) = -98.8 *(1-(T+273.15)/ 343.68 )+ 1.02 *( 70.5 -T)+ 1.02 *(T+273.15)*log((T+273.15)/ 343.68 )
GCA_000816565clpS.pdbA:Delta G(T) = -98.6 *(1-(T+273.15)/ 344.07 )+ 0.97 *( 70.9 -T)+ 0.97 *(T+273.15)*log((T+273.15)/ 344.07 )
GCA_000876655clpS.pdbA:Delta G(T) = -98.9 *(1-(T+273.15)/ 344.39 )+ 1.04 *( 71.2 -T)+ 1.04 *(T+273.15)*log((T+273.15)/ 344.39 )
GCA_000962805clpS.pdbA:Delta G(T) = -100 *(1-(T+273.15)/ 345.48 )+ 0.78 *( 72.3 -T)+ 0.78 *(T+273.15)*log((T+273.15)/ 345.48 )
GCA_001046895clpS.pdbA:Delta G(T) = -99.7 *(1-(T+273.15)/ 345.69 )+ 0.72 *( 72.5 -T)+ 0.72 *(T+273.15)*log((T+273.15)/ 345.69 )
GCA_001187915clpS.pdbA:Delta G(T) = -96.1 *(1-(T+273.15)/ 342.5 )+ 1.01 *( 69.4 -T)+ 1.01 *(T+273.15)*log((T+273.15)/ 342.5 )
GCA_001238605clpS.pdbA:Delta G(T) = -101.4 *(1-(T+273.15)/ 341.08 )+ 1.19 *( 67.9 -T)+ 1.19 *(T+273.15)*log((T+273.15)/ 341.08 )
GCA_001281315clpS.pdbA:Delta G(T) = -99.9 *(1-(T+273.15)/ 341.5 )+ 0.94 *( 68.3 -T)+ 0.94 *(T+273.15)*log((T+273.15)/ 341.5 )
GCA_001294625clpS.pdbA:Delta G(T) = -95.7 *(1-(T+273.15)/ 338.59 )+ 0.89 *( 65.4 -T)+ 0.89 *(T+273.15)*log((T+273.15)/ 338.59 )
GCA_001307035clpS.pdbA:Delta G(T) = -97.5 *(1-(T+273.15)/ 340.52 )+ 0.96 *( 67.4 -T)+ 0.96 *(T+273.15)*log((T+273.15)/ 340.52 )
GCA_001373495clpS.pdbA:Delta G(T) = -101.1 *(1-(T+273.15)/ 341.05 )+ 0.92 *( 67.9 -T)+ 0.92 *(T+273.15)*log((T+273.15)/ 341.05 )
GCA_001422645clpS.pdbA:Delta G(T) = -96.6 *(1-(T+273.15)/ 344.17 )+ 1.08 *( 71 -T)+ 1.08 *(T+273.15)*log((T+273.15)/ 344.17 )
GCA_001422665clpS.pdbA:Delta G(T) = -96.9 *(1-(T+273.15)/ 342.16 )+ 0.85 *( 69 -T)+ 0.85 *(T+273.15)*log((T+273.15)/ 342.16 )
GCA_001423525clpS.pdbA:Delta G(T) = -99.7 *(1-(T+273.15)/ 341.75 )+ 1.11 *( 68.6 -T)+ 1.11 *(T+273.15)*log((T+273.15)/ 341.75 )
GCA_001423745clpS.pdbA:Delta G(T) = -98.9 *(1-(T+273.15)/ 344.39 )+ 1.04 *( 71.2 -T)+ 1.04 *(T+273.15)*log((T+273.15)/ 344.39 )
GCA_001424565clpS.pdbA:Delta G(T) = -101.4 *(1-(T+273.15)/ 341.08 )+ 1.19 *( 67.9 -T)+ 1.19 *(T+273.15)*log((T+273.15)/ 341.08 )
GCA_001428005clpS.pdbA:Delta G(T) = -95.4 *(1-(T+273.15)/ 340.73 )+ 1.15 *( 67.6 -T)+ 1.15 *(T+273.15)*log((T+273.15)/ 340.73 )
GCA_001428075clpS.pdbA:Delta G(T) = -99.3 *(1-(T+273.15)/ 342.75 )+ 1.05 *( 69.6 -T)+ 1.05 *(T+273.15)*log((T+273.15)/ 342.75 )
GCA_001428325clpS.pdbA:Delta G(T) = -92.5 *(1-(T+273.15)/ 341.78 )+ 1.07 *( 68.6 -T)+ 1.07 *(T+273.15)*log((T+273.15)/ 341.78 )
GCA_001428335clpS.pdbA:Delta G(T) = -98.2 *(1-(T+273.15)/ 343.31 )+ 1.03 *( 70.2 -T)+ 1.03 *(T+273.15)*log((T+273.15)/ 343.31 )
GCA_001428365clpS.pdbA:Delta G(T) = -100.6 *(1-(T+273.15)/ 349.46 )+ 0.69 *( 76.3 -T)+ 0.69 *(T+273.15)*log((T+273.15)/ 349.46 )
GCA_001428435clpS.pdbA:Delta G(T) = -102.2 *(1-(T+273.15)/ 344.13 )+ 0.95 *( 71 -T)+ 0.95 *(T+273.15)*log((T+273.15)/ 344.13 )
GCA_001445575clpS.pdbA:Delta G(T) = -96.1 *(1-(T+273.15)/ 341.7 )+ 0.91 *( 68.6 -T)+ 0.91 *(T+273.15)*log((T+273.15)/ 341.7 )
GCA_001457025clpS.pdbA:Delta G(T) = -96.8 *(1-(T+273.15)/ 343.8 )+ 1.05 *( 70.6 -T)+ 1.05 *(T+273.15)*log((T+273.15)/ 343.8 )
GCA_001512285clpS.pdbA:Delta G(T) = -96.4 *(1-(T+273.15)/ 343.46 )+ 0.8 *( 70.3 -T)+ 0.8 *(T+273.15)*log((T+273.15)/ 343.46 )
GCA_001512305clpS.pdbA:Delta G(T) = -94.7 *(1-(T+273.15)/ 342.56 )+ 1.18 *( 69.4 -T)+ 1.18 *(T+273.15)*log((T+273.15)/ 342.56 )
GCA_001542565clpS.pdbA:Delta G(T) = -102.9 *(1-(T+273.15)/ 344.04 )+ 1 *( 70.9 -T)+ 1 *(T+273.15)*log((T+273.15)/ 344.04 )
GCA_001552075clpS.pdbA:Delta G(T) = -98.7 *(1-(T+273.15)/ 342.65 )+ 0.84 *( 69.5 -T)+ 0.84 *(T+273.15)*log((T+273.15)/ 342.65 )
GCA_001641125clpS.pdbA:Delta G(T) = -98.2 *(1-(T+273.15)/ 343.26 )+ 1.11 *( 70.1 -T)+ 1.11 *(T+273.15)*log((T+273.15)/ 343.26 )
GCA_001663775clpS.pdbA:Delta G(T) = -97.3 *(1-(T+273.15)/ 342.36 )+ 1.02 *( 69.2 -T)+ 1.02 *(T+273.15)*log((T+273.15)/ 342.36 )
GCA_001750145clpS.pdbA:Delta G(T) = -97.1 *(1-(T+273.15)/ 349.51 )+ 0.73 *( 76.4 -T)+ 0.73 *(T+273.15)*log((T+273.15)/ 349.51 )
GCA_001766675clpS.pdbA:Delta G(T) = -93.9 *(1-(T+273.15)/ 343.77 )+ 1.19 *( 70.6 -T)+ 1.19 *(T+273.15)*log((T+273.15)/ 343.77 )
GCA_001854365clpS.pdbA:Delta G(T) = -102.9 *(1-(T+273.15)/ 344.04 )+ 1 *( 70.9 -T)+ 1 *(T+273.15)*log((T+273.15)/ 344.04 )
GCA_001969265clpS.pdbA:Delta G(T) = -97.8 *(1-(T+273.15)/ 347.76 )+ 0.65 *( 74.6 -T)+ 0.65 *(T+273.15)*log((T+273.15)/ 347.76 )
GCA_002008315clpS.pdbA:Delta G(T) = -95.4 *(1-(T+273.15)/ 341.08 )+ 1.13 *( 67.9 -T)+ 1.13 *(T+273.15)*log((T+273.15)/ 341.08 )
GCA_002157505clpS.pdbA:Delta G(T) = -97.8 *(1-(T+273.15)/ 342.14 )+ 0.78 *( 69 -T)+ 0.78 *(T+273.15)*log((T+273.15)/ 342.14 )
GCA_002157565clpS.pdbA:Delta G(T) = -94.1 *(1-(T+273.15)/ 338.65 )+ 1 *( 65.5 -T)+ 1 *(T+273.15)*log((T+273.15)/ 338.65 )
GCA_002224285clpS.pdbA:Delta G(T) = -103.6 *(1-(T+273.15)/ 345.18 )+ 0.98 *( 72 -T)+ 0.98 *(T+273.15)*log((T+273.15)/ 345.18 )
GCA_002849715clpS.pdbA:Delta G(T) = -97 *(1-(T+273.15)/ 351.3 )+ 0.76 *( 78.2 -T)+ 0.76 *(T+273.15)*log((T+273.15)/ 351.3 )
GCA_002892795clpS.pdbA:Delta G(T) = -98.2 *(1-(T+273.15)/ 342.65 )+ 1.05 *( 69.5 -T)+ 1.05 *(T+273.15)*log((T+273.15)/ 342.65 )
GCA_002892835clpS.pdbA:Delta G(T) = -98.2 *(1-(T+273.15)/ 345.65 )+ 0.81 *( 72.5 -T)+ 0.81 *(T+273.15)*log((T+273.15)/ 345.65 )
GCA_002909415clpS.pdbA:Delta G(T) = -98.8 *(1-(T+273.15)/ 338.44 )+ 0.76 *( 65.3 -T)+ 0.76 *(T+273.15)*log((T+273.15)/ 338.44 )
GCA_002929215clpS.pdbA:Delta G(T) = -98.5 *(1-(T+273.15)/ 344.27 )+ 1.05 *( 71.1 -T)+ 1.05 *(T+273.15)*log((T+273.15)/ 344.27 )
GCA_002929255clpS.pdbA:Delta G(T) = -96.8 *(1-(T+273.15)/ 339.57 )+ 0.83 *( 66.4 -T)+ 0.83 *(T+273.15)*log((T+273.15)/ 339.57 )
GCA_002929275clpS.pdbA:Delta G(T) = -96.8 *(1-(T+273.15)/ 339.57 )+ 0.83 *( 66.4 -T)+ 0.83 *(T+273.15)*log((T+273.15)/ 339.57 )
GCA_002929295clpS.pdbA:Delta G(T) = -98 *(1-(T+273.15)/ 342.12 )+ 1.05 *( 69 -T)+ 1.05 *(T+273.15)*log((T+273.15)/ 342.12 )
GCA_002929305clpS.pdbA:Delta G(T) = -98.9 *(1-(T+273.15)/ 350.2 )+ 0.37 *( 77 -T)+ 0.37 *(T+273.15)*log((T+273.15)/ 350.2 )
GCA_002929335clpS.pdbA:Delta G(T) = -98.9 *(1-(T+273.15)/ 344.39 )+ 1.04 *( 71.2 -T)+ 1.04 *(T+273.15)*log((T+273.15)/ 344.39 )
GCA_002929355clpS.pdbA:Delta G(T) = -97.7 *(1-(T+273.15)/ 342.55 )+ 0.9 *( 69.4 -T)+ 0.9 *(T+273.15)*log((T+273.15)/ 342.55 )
GCA_002929375clpS.pdbA:Delta G(T) = -97.8 *(1-(T+273.15)/ 342.08 )+ 0.98 *( 68.9 -T)+ 0.98 *(T+273.15)*log((T+273.15)/ 342.08 )
GCA_002929385clpS.pdbA:Delta G(T) = -96.8 *(1-(T+273.15)/ 339.57 )+ 0.83 *( 66.4 -T)+ 0.83 *(T+273.15)*log((T+273.15)/ 339.57 )
GCA_002929455clpS.pdbA:Delta G(T) = -100.3 *(1-(T+273.15)/ 349.25 )+ 0.81 *( 76.1 -T)+ 0.81 *(T+273.15)*log((T+273.15)/ 349.25 )
GCA_002929705clpS.pdbA:Delta G(T) = -96.1 *(1-(T+273.15)/ 341.7 )+ 0.91 *( 68.6 -T)+ 0.91 *(T+273.15)*log((T+273.15)/ 341.7 )
GCA_002929745clpS.pdbA:Delta G(T) = -98.1 *(1-(T+273.15)/ 341.65 )+ 0.77 *( 68.5 -T)+ 0.77 *(T+273.15)*log((T+273.15)/ 341.65 )
GCA_002929755clpS.pdbA:Delta G(T) = -101.2 *(1-(T+273.15)/ 342.51 )+ 1.03 *( 69.4 -T)+ 1.03 *(T+273.15)*log((T+273.15)/ 342.51 )
GCA_002934405clpS.pdbA:Delta G(T) = -99.6 *(1-(T+273.15)/ 342.48 )+ 1.06 *( 69.3 -T)+ 1.06 *(T+273.15)*log((T+273.15)/ 342.48 )
GCA_002953935clpS.pdbA:Delta G(T) = -98.7 *(1-(T+273.15)/ 342.91 )+ 1.13 *( 69.8 -T)+ 1.13 *(T+273.15)*log((T+273.15)/ 342.91 )
GCA_002954225clpS.pdbA:Delta G(T) = -95.8 *(1-(T+273.15)/ 339.79 )+ 0.92 *( 66.6 -T)+ 0.92 *(T+273.15)*log((T+273.15)/ 339.79 )
GCA_003097355clpS.pdbA:Delta G(T) = -97.2 *(1-(T+273.15)/ 343.23 )+ 1.08 *( 70.1 -T)+ 1.08 *(T+273.15)*log((T+273.15)/ 343.23 )
GCA_003116525clpS.pdbA:Delta G(T) = -97.7 *(1-(T+273.15)/ 342.85 )+ 1.16 *( 69.7 -T)+ 1.16 *(T+273.15)*log((T+273.15)/ 342.85 )
GCA_003185915clpS.pdbA:Delta G(T) = -96.7 *(1-(T+273.15)/ 341.09 )+ 0.84 *( 67.9 -T)+ 0.84 *(T+273.15)*log((T+273.15)/ 341.09 )
GCA_003208335clpS.pdbA:Delta G(T) = -98.8 *(1-(T+273.15)/ 343.68 )+ 1.02 *( 70.5 -T)+ 1.02 *(T+273.15)*log((T+273.15)/ 343.68 )
GCA_003219795clpS.pdbA:Delta G(T) = -100.6 *(1-(T+273.15)/ 347.09 )+ 1.04 *( 73.9 -T)+ 1.04 *(T+273.15)*log((T+273.15)/ 347.09 )
GCA_003219815clpS.pdbA:Delta G(T) = -102.8 *(1-(T+273.15)/ 356.1 )+ 0.73 *( 82.9 -T)+ 0.73 *(T+273.15)*log((T+273.15)/ 356.1 )
GCA_003268655clpS.pdbA:Delta G(T) = -101.7 *(1-(T+273.15)/ 336.65 )+ 0.64 *( 63.5 -T)+ 0.64 *(T+273.15)*log((T+273.15)/ 336.65 )
GCA_003287955clpS.pdbA:Delta G(T) = -97.9 *(1-(T+273.15)/ 344.71 )+ 1.01 *( 71.6 -T)+ 1.01 *(T+273.15)*log((T+273.15)/ 344.71 )
GCA_900016675clpS.pdbA:Delta G(T) = -102.7 *(1-(T+273.15)/ 342.65 )+ 0.79 *( 69.5 -T)+ 0.79 *(T+273.15)*log((T+273.15)/ 342.65 )
GCA_900099735clpS.pdbA:Delta G(T) = -96 *(1-(T+273.15)/ 338.4 )+ 1.02 *( 65.2 -T)+ 1.02 *(T+273.15)*log((T+273.15)/ 338.4 )
GCA_900099975clpS.pdbA:Delta G(T) = -93.3 *(1-(T+273.15)/ 345.14 )+ 1.09 *( 72 -T)+ 1.09 *(T+273.15)*log((T+273.15)/ 345.14 )
GCA_900102785clpS.pdbA:Delta G(T) = -97.1 *(1-(T+273.15)/ 341.7 )+ 1.11 *( 68.5 -T)+ 1.11 *(T+273.15)*log((T+273.15)/ 341.7 )
GCA_900102805clpS.pdbA:Delta G(T) = -103.6 *(1-(T+273.15)/ 345.18 )+ 0.98 *( 72 -T)+ 0.98 *(T+273.15)*log((T+273.15)/ 345.18 )
GCA_900102895clpS.pdbA:Delta G(T) = -98.1 *(1-(T+273.15)/ 346.82 )+ 0.73 *( 73.7 -T)+ 0.73 *(T+273.15)*log((T+273.15)/ 346.82 )
GCA_900104405clpS.pdbA:Delta G(T) = -97.2 *(1-(T+273.15)/ 343.23 )+ 1.08 *( 70.1 -T)+ 1.08 *(T+273.15)*log((T+273.15)/ 343.23 )
GCA_900105345clpS.pdbA:Delta G(T) = -101.2 *(1-(T+273.15)/ 342.09 )+ 0.81 *( 68.9 -T)+ 0.81 *(T+273.15)*log((T+273.15)/ 342.09 )
GCA_900105535clpS.pdbA:Delta G(T) = -99.9 *(1-(T+273.15)/ 341.27 )+ 1.1 *( 68.1 -T)+ 1.1 *(T+273.15)*log((T+273.15)/ 341.27 )
GCA_900105965clpS.pdbA:Delta G(T) = -95.3 *(1-(T+273.15)/ 341.33 )+ 0.9 *( 68.2 -T)+ 0.9 *(T+273.15)*log((T+273.15)/ 341.33 )
GCA_900106835clpS.pdbA:Delta G(T) = -96.4 *(1-(T+273.15)/ 343.36 )+ 0.77 *( 70.2 -T)+ 0.77 *(T+273.15)*log((T+273.15)/ 343.36 )
GCA_900110595clpS.pdbA:Delta G(T) = -98.5 *(1-(T+273.15)/ 340.76 )+ 1.14 *( 67.6 -T)+ 1.14 *(T+273.15)*log((T+273.15)/ 340.76 )
GCA_900116495clpS.pdbA:Delta G(T) = -96.9 *(1-(T+273.15)/ 342.8 )+ 1.12 *( 69.7 -T)+ 1.12 *(T+273.15)*log((T+273.15)/ 342.8 )
GCA_900168135clpS.pdbA:Delta G(T) = -97.8 *(1-(T+273.15)/ 341.83 )+ 1.09 *( 68.7 -T)+ 1.09 *(T+273.15)*log((T+273.15)/ 341.83 )
GCA_900168225clpS.pdbA:Delta G(T) = -98.5 *(1-(T+273.15)/ 343.79 )+ 0.79 *( 70.6 -T)+ 0.79 *(T+273.15)*log((T+273.15)/ 343.79 )
GCA_000014925clpS.pdbA:Delta G(T) = -99.7 *(1-(T+273.15)/ 343.39 )+ 0.83 *( 70.2 -T)+ 0.83 *(T+273.15)*log((T+273.15)/ 343.39 )
GCA_000022025clpS.pdbA:Delta G(T) = -99.2 *(1-(T+273.15)/ 342.29 )+ 1.07 *( 69.1 -T)+ 1.07 *(T+273.15)*log((T+273.15)/ 342.29 )
GCA_000189535clpS.pdbA:Delta G(T) = -91.8 *(1-(T+273.15)/ 341.72 )+ 1.1 *( 68.6 -T)+ 1.1 *(T+273.15)*log((T+273.15)/ 341.72 )
GCA_000196235clpS.pdbA:Delta G(T) = -98.9 *(1-(T+273.15)/ 344.39 )+ 1.04 *( 71.2 -T)+ 1.04 *(T+273.15)*log((T+273.15)/ 344.39 )
GCA_000238915clpS.pdbA:Delta G(T) = -98.2 *(1-(T+273.15)/ 342.65 )+ 1.05 *( 69.5 -T)+ 1.05 *(T+273.15)*log((T+273.15)/ 342.65 )
GCA_000281065clpS.pdbA:Delta G(T) = -99.7 *(1-(T+273.15)/ 343.39 )+ 0.83 *( 70.2 -T)+ 0.83 *(T+273.15)*log((T+273.15)/ 343.39 )
GCA_000294595clpS.pdbA:Delta G(T) = -99.2 *(1-(T+273.15)/ 346.77 )+ 1.11 *( 73.6 -T)+ 1.11 *(T+273.15)*log((T+273.15)/ 346.77 )
GCA_000294695clpS.pdbA:Delta G(T) = -99.7 *(1-(T+273.15)/ 343.39 )+ 0.83 *( 70.2 -T)+ 0.83 *(T+273.15)*log((T+273.15)/ 343.39 )
GCA_000332815clpS.pdbA:Delta G(T) = -100.2 *(1-(T+273.15)/ 342.39 )+ 0.93 *( 69.2 -T)+ 0.93 *(T+273.15)*log((T+273.15)/ 342.39 )
GCA_000374865clpS.pdbA:Delta G(T) = -92.1 *(1-(T+273.15)/ 341.63 )+ 1.12 *( 68.5 -T)+ 1.12 *(T+273.15)*log((T+273.15)/ 341.63 )
GCA_000374905clpS.pdbA:Delta G(T) = -92.5 *(1-(T+273.15)/ 341.78 )+ 1.07 *( 68.6 -T)+ 1.07 *(T+273.15)*log((T+273.15)/ 341.78 )
GCA_000374925clpS.pdbA:Delta G(T) = -96.3 *(1-(T+273.15)/ 341.33 )+ 1.11 *( 68.2 -T)+ 1.11 *(T+273.15)*log((T+273.15)/ 341.33 )
GCA_000374945
GCA_000468215
GCA_000482545
GCA_000514015
GCA_000514155
GCA_000517125
GCA_000520555
GCA_000520575
GCA_000520595
GCA_000620385
GCA_000685965
GCA_000755585
GCA_000785535
GCA_000813845
GCA_000816565
GCA_000876655
GCA_000962805
GCA_001046895
GCA_001187915
GCA_001238605
GCA_001281315
GCA_001294625
GCA_001307035
GCA_001373495
GCA_001422645
GCA_001422665
GCA_001423525
GCA_001423745
GCA_001424565
GCA_001428005
GCA_001428075
GCA_001428325
GCA_001428335
GCA_001428365
GCA_001428435
GCA_001445575
GCA_001457025
GCA_001512285
GCA_001512305
GCA_001542565
GCA_001552075
GCA_001641125
GCA_001663775
GCA_001750145
GCA_001766675
GCA_001854365
GCA_001969265
GCA_002008315
GCA_002157505
GCA_002157565
GCA_002224285
GCA_002849715
GCA_002892795
GCA_002892835
GCA_002909415
GCA_002929215
GCA_002929255
GCA_002929275
GCA_002929295
GCA_002929305
GCA_002929335
GCA_002929355
GCA_002929375
GCA_002929385
GCA_002929455
GCA_002929705
GCA_002929745
GCA_002929755
GCA_002934405
GCA_002953935
GCA_002954225
GCA_003097355
GCA_003116525
GCA_003185915
GCA_003208335
GCA_003219795
GCA_003219815
GCA_003268655
GCA_003287955
GCA_900016675
GCA_900099735
GCA_900099975
GCA_900102785
GCA_900102805
GCA_900102895
GCA_900104405
GCA_900105345
GCA_900105535
GCA_900105965
GCA_900106835
GCA_900110595
GCA_900116495
GCA_900168135
GCA_900168225
GCA_000014925
GCA_000022025
GCA_000189535
GCA_000196235
GCA_000238915
GCA_000281065
GCA_000294595
GCA_000294695
GCA_000332815
GCA_000374865
GCA_000374905
GCA_000374925
GCA_000014925.faa_coaB.pdbA:Delta G(T) = -117.9 *(1-(T+273.15)/ 334.04 )+ 2.9 *( 60.9 -T)+ 2.9 *(T+273.15)*log((T+273.15)/ 334.04 )
GCA_000022025.faa_coaB.pdbA:Delta G(T) = -115 *(1-(T+273.15)/ 337.46 )+ 2.47 *( 64.3 -T)+ 2.47 *(T+273.15)*log((T+273.15)/ 337.46 )
GCA_000189535.faa_coaB.pdbA:Delta G(T) = -106.5 *(1-(T+273.15)/ 334.88 )+ 2.58 *( 61.7 -T)+ 2.58 *(T+273.15)*log((T+273.15)/ 334.88 )
GCA_000196235.faa_coaB.pdbA:Delta G(T) = -104.9 *(1-(T+273.15)/ 333.99 )+ 2.94 *( 60.8 -T)+ 2.94 *(T+273.15)*log((T+273.15)/ 333.99 )
GCA_000238915.faa_coaB.pdbA:Delta G(T) = -95.8 *(1-(T+273.15)/ 334.54 )+ 2.43 *( 61.4 -T)+ 2.43 *(T+273.15)*log((T+273.15)/ 334.54 )
GCA_000281065.faa_coaB.pdbA:Delta G(T) = -114.6 *(1-(T+273.15)/ 331.34 )+ 2.83 *( 58.2 -T)+ 2.83 *(T+273.15)*log((T+273.15)/ 331.34 )
GCA_000294595.faa_coaB.pdbA:Delta G(T) = -122.6 *(1-(T+273.15)/ 331.75 )+ 2.4 *( 58.6 -T)+ 2.4 *(T+273.15)*log((T+273.15)/ 331.75 )
GCA_000294695.faa_coaB.pdbA:Delta G(T) = -117.9 *(1-(T+273.15)/ 334.04 )+ 2.9 *( 60.9 -T)+ 2.9 *(T+273.15)*log((T+273.15)/ 334.04 )
GCA_000332815.faa_coaB.pdbA:Delta G(T) = -109.2 *(1-(T+273.15)/ 335.03 )+ 2.41 *( 61.9 -T)+ 2.41 *(T+273.15)*log((T+273.15)/ 335.03 )
GCA_000374865.faa_coaB.pdbA:Delta G(T) = -103.7 *(1-(T+273.15)/ 333.52 )+ 2.33 *( 60.4 -T)+ 2.33 *(T+273.15)*log((T+273.15)/ 333.52 )
GCA_000374905.faa_coaB.pdbA:Delta G(T) = -104.6 *(1-(T+273.15)/ 334.19 )+ 2.1 *( 61 -T)+ 2.1 *(T+273.15)*log((T+273.15)/ 334.19 )
GCA_000374925.faa_coaB.pdbA:Delta G(T) = -108.9 *(1-(T+273.15)/ 335.72 )+ 2.59 *( 62.6 -T)+ 2.59 *(T+273.15)*log((T+273.15)/ 335.72 )
GCA_000374945.faa_coaB.pdbA:Delta G(T) = -113.6 *(1-(T+273.15)/ 333.3 )+ 2.43 *( 60.1 -T)+ 2.43 *(T+273.15)*log((T+273.15)/ 333.3 )
GCA_000482545.faa_coaB.pdbA:Delta G(T) = -113.8 *(1-(T+273.15)/ 331.58 )+ 2.77 *( 58.4 -T)+ 2.77 *(T+273.15)*log((T+273.15)/ 331.58 )
GCA_000514015.faa_coaB.pdbA:Delta G(T) = -111.7 *(1-(T+273.15)/ 334.2 )+ 2.43 *( 61.1 -T)+ 2.43 *(T+273.15)*log((T+273.15)/ 334.2 )
GCA_000514155.faa_coaB.pdbA:Delta G(T) = -114.5 *(1-(T+273.15)/ 333.97 )+ 2.43 *( 60.8 -T)+ 2.43 *(T+273.15)*log((T+273.15)/ 333.97 )
GCA_000517125.faa_coaB.pdbA:Delta G(T) = -112.2 *(1-(T+273.15)/ 335.84 )+ 2.83 *( 62.7 -T)+ 2.83 *(T+273.15)*log((T+273.15)/ 335.84 )
GCA_000520555.faa_coaB.pdbA:Delta G(T) = -120.6 *(1-(T+273.15)/ 330.06 )+ 2.61 *( 56.9 -T)+ 2.61 *(T+273.15)*log((T+273.15)/ 330.06 )
GCA_000520575.faa_coaB.pdbA:Delta G(T) = -120.6 *(1-(T+273.15)/ 330.06 )+ 2.61 *( 56.9 -T)+ 2.61 *(T+273.15)*log((T+273.15)/ 330.06 )
GCA_000520595.faa_coaB.pdbA:Delta G(T) = -111.8 *(1-(T+273.15)/ 328.81 )+ 2.67 *( 55.7 -T)+ 2.67 *(T+273.15)*log((T+273.15)/ 328.81 )
GCA_000620385.faa_coaB.pdbA:Delta G(T) = -108.9 *(1-(T+273.15)/ 335.27 )+ 2.52 *( 62.1 -T)+ 2.52 *(T+273.15)*log((T+273.15)/ 335.27 )
GCA_000685965.faa_coaB.pdbA:Delta G(T) = -99.2 *(1-(T+273.15)/ 333.43 )+ 2.61 *( 60.3 -T)+ 2.61 *(T+273.15)*log((T+273.15)/ 333.43 )
GCA_000755585.faa_coaB.pdbA:Delta G(T) = -107.1 *(1-(T+273.15)/ 338.93 )+ 2.62 *( 65.8 -T)+ 2.62 *(T+273.15)*log((T+273.15)/ 338.93 )
GCA_000785535.faa_coaB.pdbA:Delta G(T) = -108.8 *(1-(T+273.15)/ 333.62 )+ 2.76 *( 60.5 -T)+ 2.76 *(T+273.15)*log((T+273.15)/ 333.62 )
GCA_000813845.faa_coaB.pdbA:Delta G(T) = -114.5 *(1-(T+273.15)/ 335.69 )+ 2.26 *( 62.5 -T)+ 2.26 *(T+273.15)*log((T+273.15)/ 335.69 )
GCA_000816565.faa_coaB.pdbA:Delta G(T) = -104.8 *(1-(T+273.15)/ 334.81 )+ 2.32 *( 61.7 -T)+ 2.32 *(T+273.15)*log((T+273.15)/ 334.81 )
GCA_000876655.faa_coaB.pdbA:Delta G(T) = -105.8 *(1-(T+273.15)/ 332.71 )+ 2.75 *( 59.6 -T)+ 2.75 *(T+273.15)*log((T+273.15)/ 332.71 )
GCA_000962805.faa_coaB.pdbA:Delta G(T) = -117.3 *(1-(T+273.15)/ 339.01 )+ 2.65 *( 65.9 -T)+ 2.65 *(T+273.15)*log((T+273.15)/ 339.01 )
GCA_001046895.faa_coaB.pdbA:Delta G(T) = -103.8 *(1-(T+273.15)/ 334.74 )+ 2.58 *( 61.6 -T)+ 2.58 *(T+273.15)*log((T+273.15)/ 334.74 )
GCA_001187915.faa_coaB.pdbA:Delta G(T) = -105.6 *(1-(T+273.15)/ 332.58 )+ 2.16 *( 59.4 -T)+ 2.16 *(T+273.15)*log((T+273.15)/ 332.58 )
GCA_001238605.faa_coaB.pdbA:Delta G(T) = -103.2 *(1-(T+273.15)/ 335.36 )+ 2.18 *( 62.2 -T)+ 2.18 *(T+273.15)*log((T+273.15)/ 335.36 )
GCA_001281315.faa_coaB.pdbA:Delta G(T) = -105.6 *(1-(T+273.15)/ 335.88 )+ 2.97 *( 62.7 -T)+ 2.97 *(T+273.15)*log((T+273.15)/ 335.88 )
GCA_001294625.faa_coaB.pdbA:Delta G(T) = -105.9 *(1-(T+273.15)/ 336.95 )+ 3.1 *( 63.8 -T)+ 3.1 *(T+273.15)*log((T+273.15)/ 336.95 )
GCA_001307035.faa_coaB.pdbA:Delta G(T) = -111.4 *(1-(T+273.15)/ 333.55 )+ 2.08 *( 60.4 -T)+ 2.08 *(T+273.15)*log((T+273.15)/ 333.55 )
GCA_001373495.faa_coaB.pdbA:Delta G(T) = -121.5 *(1-(T+273.15)/ 334.23 )+ 2.19 *( 61.1 -T)+ 2.19 *(T+273.15)*log((T+273.15)/ 334.23 )
GCA_001422645.faa_coaB.pdbA:Delta G(T) = -101.5 *(1-(T+273.15)/ 336.4 )+ 2.58 *( 63.3 -T)+ 2.58 *(T+273.15)*log((T+273.15)/ 336.4 )
GCA_001422665.faa_coaB.pdbA:Delta G(T) = -112 *(1-(T+273.15)/ 334.43 )+ 2.23 *( 61.3 -T)+ 2.23 *(T+273.15)*log((T+273.15)/ 334.43 )
GCA_001423525.faa_coaB.pdbA:Delta G(T) = -114.6 *(1-(T+273.15)/ 336.3 )+ 2.46 *( 63.2 -T)+ 2.46 *(T+273.15)*log((T+273.15)/ 336.3 )
GCA_001423745.faa_coaB.pdbA:Delta G(T) = -100.2 *(1-(T+273.15)/ 333.62 )+ 2.67 *( 60.5 -T)+ 2.67 *(T+273.15)*log((T+273.15)/ 333.62 )
GCA_001424565.faa_coaB.pdbA:Delta G(T) = -103.2 *(1-(T+273.15)/ 335.36 )+ 2.18 *( 62.2 -T)+ 2.18 *(T+273.15)*log((T+273.15)/ 335.36 )
GCA_001428005.faa_coaB.pdbA:Delta G(T) = -109.4 *(1-(T+273.15)/ 333.59 )+ 2.68 *( 60.4 -T)+ 2.68 *(T+273.15)*log((T+273.15)/ 333.59 )
GCA_001428075.faa_coaB.pdbA:Delta G(T) = -107.9 *(1-(T+273.15)/ 334.49 )+ 2.27 *( 61.3 -T)+ 2.27 *(T+273.15)*log((T+273.15)/ 334.49 )
GCA_001428325.faa_coaB.pdbA:Delta G(T) = -104.6 *(1-(T+273.15)/ 334.19 )+ 2.1 *( 61 -T)+ 2.1 *(T+273.15)*log((T+273.15)/ 334.19 )
GCA_001428335.faa_coaB.pdbA:Delta G(T) = -101.9 *(1-(T+273.15)/ 334.88 )+ 2.33 *( 61.7 -T)+ 2.33 *(T+273.15)*log((T+273.15)/ 334.88 )
GCA_001428365.faa_coaB.pdbA:Delta G(T) = -108.1 *(1-(T+273.15)/ 335.6 )+ 2.18 *( 62.4 -T)+ 2.18 *(T+273.15)*log((T+273.15)/ 335.6 )
GCA_001428435.faa_coaB.pdbA:Delta G(T) = -112.6 *(1-(T+273.15)/ 332.38 )+ 2.84 *( 59.2 -T)+ 2.84 *(T+273.15)*log((T+273.15)/ 332.38 )
GCA_001445575.faa_coaB.pdbA:Delta G(T) = -115.4 *(1-(T+273.15)/ 333.53 )+ 3.08 *( 60.4 -T)+ 3.08 *(T+273.15)*log((T+273.15)/ 333.53 )
GCA_001457025.faa_coaB.pdbA:Delta G(T) = -113.5 *(1-(T+273.15)/ 334.7 )+ 2.58 *( 61.6 -T)+ 2.58 *(T+273.15)*log((T+273.15)/ 334.7 )
GCA_001512285.faa_coaB.pdbA:Delta G(T) = -107.7 *(1-(T+273.15)/ 332.62 )+ 2.75 *( 59.5 -T)+ 2.75 *(T+273.15)*log((T+273.15)/ 332.62 )
GCA_001512305.faa_coaB.pdbA:Delta G(T) = -107.1 *(1-(T+273.15)/ 337.66 )+ 2.8 *( 64.5 -T)+ 2.8 *(T+273.15)*log((T+273.15)/ 337.66 )
GCA_001542565.faa_coaB.pdbA:Delta G(T) = -118.1 *(1-(T+273.15)/ 336.41 )+ 3.14 *( 63.3 -T)+ 3.14 *(T+273.15)*log((T+273.15)/ 336.41 )
GCA_001552075.faa_coaB.pdbA:Delta G(T) = -97.8 *(1-(T+273.15)/ 335.36 )+ 1.74 *( 62.2 -T)+ 1.74 *(T+273.15)*log((T+273.15)/ 335.36 )
GCA_001641125.faa_coaB.pdbA:Delta G(T) = -111.9 *(1-(T+273.15)/ 334.88 )+ 2.8 *( 61.7 -T)+ 2.8 *(T+273.15)*log((T+273.15)/ 334.88 )
GCA_001663775.faa_coaB.pdbA:Delta G(T) = -110 *(1-(T+273.15)/ 338.21 )+ 2.73 *( 65.1 -T)+ 2.73 *(T+273.15)*log((T+273.15)/ 338.21 )
GCA_001750145.faa_coaB.pdbA:Delta G(T) = -101.3 *(1-(T+273.15)/ 336.4 )+ 2.4 *( 63.3 -T)+ 2.4 *(T+273.15)*log((T+273.15)/ 336.4 )
GCA_001766675.faa_coaB.pdbA:Delta G(T) = -111.5 *(1-(T+273.15)/ 329.44 )+ 2.44 *( 56.3 -T)+ 2.44 *(T+273.15)*log((T+273.15)/ 329.44 )
GCA_001854365.faa_coaB.pdbA:Delta G(T) = -118.1 *(1-(T+273.15)/ 336.41 )+ 3.14 *( 63.3 -T)+ 3.14 *(T+273.15)*log((T+273.15)/ 336.41 )
GCA_001969265.faa_coaB.pdbA:Delta G(T) = -106.6 *(1-(T+273.15)/ 335.02 )+ 2.66 *( 61.9 -T)+ 2.66 *(T+273.15)*log((T+273.15)/ 335.02 )
GCA_002008315.faa_coaB.pdbA:Delta G(T) = -105.2 *(1-(T+273.15)/ 334.47 )+ 2.79 *( 61.3 -T)+ 2.79 *(T+273.15)*log((T+273.15)/ 334.47 )
GCA_002157505.faa_coaB.pdbA:Delta G(T) = -114.4 *(1-(T+273.15)/ 332.28 )+ 2.31 *( 59.1 -T)+ 2.31 *(T+273.15)*log((T+273.15)/ 332.28 )
GCA_002157565.faa_coaB.pdbA:Delta G(T) = -113.7 *(1-(T+273.15)/ 334.36 )+ 2.48 *( 61.2 -T)+ 2.48 *(T+273.15)*log((T+273.15)/ 334.36 )
GCA_002224285.faa_coaB.pdbA:Delta G(T) = -113.3 *(1-(T+273.15)/ 333.95 )+ 2.7 *( 60.8 -T)+ 2.7 *(T+273.15)*log((T+273.15)/ 333.95 )
GCA_002849715.faa_coaB.pdbA:Delta G(T) = -103 *(1-(T+273.15)/ 333.13 )+ 2.1 *( 60 -T)+ 2.1 *(T+273.15)*log((T+273.15)/ 333.13 )
GCA_002892795.faa_coaB.pdbA:Delta G(T) = -104.4 *(1-(T+273.15)/ 333.4 )+ 2.77 *( 60.2 -T)+ 2.77 *(T+273.15)*log((T+273.15)/ 333.4 )
GCA_002892835.faa_coaB.pdbA:Delta G(T) = -105.9 *(1-(T+273.15)/ 337.03 )+ 2.6 *( 63.9 -T)+ 2.6 *(T+273.15)*log((T+273.15)/ 337.03 )
GCA_002909415.faa_coaB.pdbA:Delta G(T) = -109.1 *(1-(T+273.15)/ 335.15 )+ 2.66 *( 62 -T)+ 2.66 *(T+273.15)*log((T+273.15)/ 335.15 )
GCA_002929215.faa_coaB.pdbA:Delta G(T) = -107.3 *(1-(T+273.15)/ 334.87 )+ 2.14 *( 61.7 -T)+ 2.14 *(T+273.15)*log((T+273.15)/ 334.87 )
GCA_002929255.faa_coaB.pdbA:Delta G(T) = -109.5 *(1-(T+273.15)/ 336.03 )+ 2.53 *( 62.9 -T)+ 2.53 *(T+273.15)*log((T+273.15)/ 336.03 )
GCA_002929275.faa_coaB.pdbA:Delta G(T) = -109.5 *(1-(T+273.15)/ 336.03 )+ 2.53 *( 62.9 -T)+ 2.53 *(T+273.15)*log((T+273.15)/ 336.03 )
GCA_002929295.faa_coaB.pdbA:Delta G(T) = -113.9 *(1-(T+273.15)/ 332.63 )+ 2.53 *( 59.5 -T)+ 2.53 *(T+273.15)*log((T+273.15)/ 332.63 )
GCA_002929305.faa_coaB.pdbA:Delta G(T) = -105.2 *(1-(T+273.15)/ 334.6 )+ 2.89 *( 61.5 -T)+ 2.89 *(T+273.15)*log((T+273.15)/ 334.6 )
GCA_002929335.faa_coaB.pdbA:Delta G(T) = -103.2 *(1-(T+273.15)/ 333.62 )+ 2.62 *( 60.5 -T)+ 2.62 *(T+273.15)*log((T+273.15)/ 333.62 )
GCA_002929355.faa_coaB.pdbA:Delta G(T) = -105.1 *(1-(T+273.15)/ 334.68 )+ 2.14 *( 61.5 -T)+ 2.14 *(T+273.15)*log((T+273.15)/ 334.68 )
GCA_002929375.faa_coaB.pdbA:Delta G(T) = -111 *(1-(T+273.15)/ 336.91 )+ 2.24 *( 63.8 -T)+ 2.24 *(T+273.15)*log((T+273.15)/ 336.91 )
GCA_002929385.faa_coaB.pdbA:Delta G(T) = -106.9 *(1-(T+273.15)/ 336.02 )+ 2.28 *( 62.9 -T)+ 2.28 *(T+273.15)*log((T+273.15)/ 336.02 )
GCA_002929455.faa_coaB.pdbA:Delta G(T) = -111.8 *(1-(T+273.15)/ 335.52 )+ 2.43 *( 62.4 -T)+ 2.43 *(T+273.15)*log((T+273.15)/ 335.52 )
GCA_002929705.faa_coaB.pdbA:Delta G(T) = -109.1 *(1-(T+273.15)/ 334.69 )+ 3.18 *( 61.5 -T)+ 3.18 *(T+273.15)*log((T+273.15)/ 334.69 )
GCA_002929745.faa_coaB.pdbA:Delta G(T) = -98.1 *(1-(T+273.15)/ 333.99 )+ 2.19 *( 60.8 -T)+ 2.19 *(T+273.15)*log((T+273.15)/ 333.99 )
GCA_002929755.faa_coaB.pdbA:Delta G(T) = -100.5 *(1-(T+273.15)/ 334.93 )+ 2.23 *( 61.8 -T)+ 2.23 *(T+273.15)*log((T+273.15)/ 334.93 )
GCA_002934405.faa_coaB.pdbA:Delta G(T) = -103.6 *(1-(T+273.15)/ 336.47 )+ 2.92 *( 63.3 -T)+ 2.92 *(T+273.15)*log((T+273.15)/ 336.47 )
GCA_002953935.faa_coaB.pdbA:Delta G(T) = -108.4 *(1-(T+273.15)/ 335.07 )+ 2.57 *( 61.9 -T)+ 2.57 *(T+273.15)*log((T+273.15)/ 335.07 )
GCA_002954225.faa_coaB.pdbA:Delta G(T) = -111 *(1-(T+273.15)/ 332.65 )+ 2.51 *( 59.5 -T)+ 2.51 *(T+273.15)*log((T+273.15)/ 332.65 )
GCA_003097355.faa_coaB.pdbA:Delta G(T) = -105.4 *(1-(T+273.15)/ 335.93 )+ 2.68 *( 62.8 -T)+ 2.68 *(T+273.15)*log((T+273.15)/ 335.93 )
GCA_003116525.faa_coaB.pdbA:Delta G(T) = -101.1 *(1-(T+273.15)/ 333.98 )+ 2.35 *( 60.8 -T)+ 2.35 *(T+273.15)*log((T+273.15)/ 333.98 )
GCA_003185915.faa_coaB.pdbA:Delta G(T) = -110.3 *(1-(T+273.15)/ 332.95 )+ 2.87 *( 59.8 -T)+ 2.87 *(T+273.15)*log((T+273.15)/ 332.95 )
GCA_003208335.faa_coaB.pdbA:Delta G(T) = -113.1 *(1-(T+273.15)/ 335.04 )+ 2.48 *( 61.9 -T)+ 2.48 *(T+273.15)*log((T+273.15)/ 335.04 )
GCA_003219795.faa_coaB.pdbA:Delta G(T) = -107.3 *(1-(T+273.15)/ 331.83 )+ 2.66 *( 58.7 -T)+ 2.66 *(T+273.15)*log((T+273.15)/ 331.83 )
GCA_003219815.faa_coaB.pdbA:Delta G(T) = -104.6 *(1-(T+273.15)/ 333.12 )+ 2.93 *( 60 -T)+ 2.93 *(T+273.15)*log((T+273.15)/ 333.12 )
GCA_003268655.faa_coaB.pdbA:Delta G(T) = -111.3 *(1-(T+273.15)/ 335.33 )+ 3.16 *( 62.2 -T)+ 3.16 *(T+273.15)*log((T+273.15)/ 335.33 )
GCA_003287955.faa_coaB.pdbA:Delta G(T) = -103.1 *(1-(T+273.15)/ 335.75 )+ 2.53 *( 62.6 -T)+ 2.53 *(T+273.15)*log((T+273.15)/ 335.75 )
GCA_900016675.faa_coaB.pdbA:Delta G(T) = -113.8 *(1-(T+273.15)/ 337.38 )+ 2.05 *( 64.2 -T)+ 2.05 *(T+273.15)*log((T+273.15)/ 337.38 )
GCA_900099735.faa_coaB.pdbA:Delta G(T) = -115.2 *(1-(T+273.15)/ 333.81 )+ 2.1 *( 60.7 -T)+ 2.1 *(T+273.15)*log((T+273.15)/ 333.81 )
GCA_900099975.faa_coaB.pdbA:Delta G(T) = -119.4 *(1-(T+273.15)/ 330.51 )+ 2.43 *( 57.4 -T)+ 2.43 *(T+273.15)*log((T+273.15)/ 330.51 )
GCA_900102785.faa_coaB.pdbA:Delta G(T) = -104 *(1-(T+273.15)/ 334.37 )+ 2.23 *( 61.2 -T)+ 2.23 *(T+273.15)*log((T+273.15)/ 334.37 )
GCA_900102805.faa_coaB.pdbA:Delta G(T) = -114.5 *(1-(T+273.15)/ 333.97 )+ 2.43 *( 60.8 -T)+ 2.43 *(T+273.15)*log((T+273.15)/ 333.97 )
GCA_900102895.faa_coaB.pdbA:Delta G(T) = -99.9 *(1-(T+273.15)/ 335.3 )+ 2.5 *( 62.1 -T)+ 2.5 *(T+273.15)*log((T+273.15)/ 335.3 )
GCA_900104405.faa_coaB.pdbA:Delta G(T) = -104.4 *(1-(T+273.15)/ 335.42 )+ 2.6 *( 62.3 -T)+ 2.6 *(T+273.15)*log((T+273.15)/ 335.42 )
GCA_900105345.faa_coaB.pdbA:Delta G(T) = -100.9 *(1-(T+273.15)/ 331.12 )+ 1.96 *( 58 -T)+ 1.96 *(T+273.15)*log((T+273.15)/ 331.12 )
GCA_900105535.faa_coaB.pdbA:Delta G(T) = -116.1 *(1-(T+273.15)/ 339.14 )+ 2.7 *( 66 -T)+ 2.7 *(T+273.15)*log((T+273.15)/ 339.14 )
GCA_900105965.faa_coaB.pdbA:Delta G(T) = -90.1 *(1-(T+273.15)/ 336.39 )+ 1.54 *( 63.2 -T)+ 1.54 *(T+273.15)*log((T+273.15)/ 336.39 )
GCA_900106835.faa_coaB.pdbA:Delta G(T) = -119.3 *(1-(T+273.15)/ 333.59 )+ 2.86 *( 60.4 -T)+ 2.86 *(T+273.15)*log((T+273.15)/ 333.59 )
GCA_900110595.faa_coaB.pdbA:Delta G(T) = -110.6 *(1-(T+273.15)/ 336.89 )+ 2.6 *( 63.7 -T)+ 2.6 *(T+273.15)*log((T+273.15)/ 336.89 )
GCA_900116495.faa_coaB.pdbA:Delta G(T) = -105.1 *(1-(T+273.15)/ 334.43 )+ 2.47 *( 61.3 -T)+ 2.47 *(T+273.15)*log((T+273.15)/ 334.43 )
GCA_900168135.faa_coaB.pdbA:Delta G(T) = -106.6 *(1-(T+273.15)/ 335.6 )+ 2.52 *( 62.5 -T)+ 2.52 *(T+273.15)*log((T+273.15)/ 335.6 )
GCA_900168225.faa_coaB.pdbA:Delta G(T) = -113.6 *(1-(T+273.15)/ 333.3 )+ 2.43 *( 60.1 -T)+ 2.43 *(T+273.15)*log((T+273.15)/ 333.3 )
GCA_000374945coaBC.pdbA:Delta G(T) = -113.6 *(1-(T+273.15)/ 333.3 )+ 2.43 *( 60.1 -T)+ 2.43 *(T+273.15)*log((T+273.15)/ 333.3 )
GCA_000482545coaBC.pdbA:Delta G(T) = -113.8 *(1-(T+273.15)/ 331.58 )+ 2.77 *( 58.4 -T)+ 2.77 *(T+273.15)*log((T+273.15)/ 331.58 )
GCA_000514015coaBC.pdbA:Delta G(T) = -111.7 *(1-(T+273.15)/ 334.2 )+ 2.43 *( 61.1 -T)+ 2.43 *(T+273.15)*log((T+273.15)/ 334.2 )
GCA_000514155coaBC.pdbA:Delta G(T) = -114.5 *(1-(T+273.15)/ 333.97 )+ 2.43 *( 60.8 -T)+ 2.43 *(T+273.15)*log((T+273.15)/ 333.97 )
GCA_000517125coaBC.pdbA:Delta G(T) = -112.2 *(1-(T+273.15)/ 335.84 )+ 2.83 *( 62.7 -T)+ 2.83 *(T+273.15)*log((T+273.15)/ 335.84 )
GCA_000520555coaBC.pdbA:Delta G(T) = -120.6 *(1-(T+273.15)/ 330.06 )+ 2.61 *( 56.9 -T)+ 2.61 *(T+273.15)*log((T+273.15)/ 330.06 )
GCA_000520575coaBC.pdbA:Delta G(T) = -120.6 *(1-(T+273.15)/ 330.06 )+ 2.61 *( 56.9 -T)+ 2.61 *(T+273.15)*log((T+273.15)/ 330.06 )
GCA_000520595coaBC.pdbA:Delta G(T) = -111.8 *(1-(T+273.15)/ 328.81 )+ 2.67 *( 55.7 -T)+ 2.67 *(T+273.15)*log((T+273.15)/ 328.81 )
GCA_000620385coaBC.pdbA:Delta G(T) = -108.9 *(1-(T+273.15)/ 335.27 )+ 2.52 *( 62.1 -T)+ 2.52 *(T+273.15)*log((T+273.15)/ 335.27 )
GCA_000685965coaBC.pdbA:Delta G(T) = -99.2 *(1-(T+273.15)/ 333.43 )+ 2.61 *( 60.3 -T)+ 2.61 *(T+273.15)*log((T+273.15)/ 333.43 )
GCA_000755585coaBC.pdbA:Delta G(T) = -107.1 *(1-(T+273.15)/ 338.93 )+ 2.62 *( 65.8 -T)+ 2.62 *(T+273.15)*log((T+273.15)/ 338.93 )
GCA_000785535coaBC.pdbA:Delta G(T) = -108.8 *(1-(T+273.15)/ 333.62 )+ 2.76 *( 60.5 -T)+ 2.76 *(T+273.15)*log((T+273.15)/ 333.62 )
GCA_000813845coaBC.pdbA:Delta G(T) = -114.5 *(1-(T+273.15)/ 335.69 )+ 2.26 *( 62.5 -T)+ 2.26 *(T+273.15)*log((T+273.15)/ 335.69 )
GCA_000816565coaBC.pdbA:Delta G(T) = -104.8 *(1-(T+273.15)/ 334.81 )+ 2.32 *( 61.7 -T)+ 2.32 *(T+273.15)*log((T+273.15)/ 334.81 )
GCA_000876655coaBC.pdbA:Delta G(T) = -105.8 *(1-(T+273.15)/ 332.71 )+ 2.75 *( 59.6 -T)+ 2.75 *(T+273.15)*log((T+273.15)/ 332.71 )
GCA_000962805coaBC.pdbA:Delta G(T) = -117.3 *(1-(T+273.15)/ 339.01 )+ 2.65 *( 65.9 -T)+ 2.65 *(T+273.15)*log((T+273.15)/ 339.01 )
GCA_001046895coaBC.pdbA:Delta G(T) = -103.8 *(1-(T+273.15)/ 334.74 )+ 2.58 *( 61.6 -T)+ 2.58 *(T+273.15)*log((T+273.15)/ 334.74 )
GCA_001187915coaBC.pdbA:Delta G(T) = -105.6 *(1-(T+273.15)/ 332.58 )+ 2.16 *( 59.4 -T)+ 2.16 *(T+273.15)*log((T+273.15)/ 332.58 )
GCA_001238605coaBC.pdbA:Delta G(T) = -103.2 *(1-(T+273.15)/ 335.36 )+ 2.18 *( 62.2 -T)+ 2.18 *(T+273.15)*log((T+273.15)/ 335.36 )
GCA_001281315coaBC.pdbA:Delta G(T) = -105.6 *(1-(T+273.15)/ 335.88 )+ 2.97 *( 62.7 -T)+ 2.97 *(T+273.15)*log((T+273.15)/ 335.88 )
GCA_001294625coaBC.pdbA:Delta G(T) = -105.9 *(1-(T+273.15)/ 336.95 )+ 3.1 *( 63.8 -T)+ 3.1 *(T+273.15)*log((T+273.15)/ 336.95 )
GCA_001307035coaBC.pdbA:Delta G(T) = -111.4 *(1-(T+273.15)/ 333.55 )+ 2.08 *( 60.4 -T)+ 2.08 *(T+273.15)*log((T+273.15)/ 333.55 )
GCA_001373495coaBC.pdbA:Delta G(T) = -121.5 *(1-(T+273.15)/ 334.23 )+ 2.19 *( 61.1 -T)+ 2.19 *(T+273.15)*log((T+273.15)/ 334.23 )
GCA_001422645coaBC.pdbA:Delta G(T) = -101.5 *(1-(T+273.15)/ 336.4 )+ 2.58 *( 63.3 -T)+ 2.58 *(T+273.15)*log((T+273.15)/ 336.4 )
GCA_001422665coaBC.pdbA:Delta G(T) = -112 *(1-(T+273.15)/ 334.43 )+ 2.23 *( 61.3 -T)+ 2.23 *(T+273.15)*log((T+273.15)/ 334.43 )
GCA_001423525coaBC.pdbA:Delta G(T) = -114.6 *(1-(T+273.15)/ 336.3 )+ 2.46 *( 63.2 -T)+ 2.46 *(T+273.15)*log((T+273.15)/ 336.3 )
GCA_001423745coaBC.pdbA:Delta G(T) = -100.2 *(1-(T+273.15)/ 333.62 )+ 2.67 *( 60.5 -T)+ 2.67 *(T+273.15)*log((T+273.15)/ 333.62 )
GCA_001424565coaBC.pdbA:Delta G(T) = -103.2 *(1-(T+273.15)/ 335.36 )+ 2.18 *( 62.2 -T)+ 2.18 *(T+273.15)*log((T+273.15)/ 335.36 )
GCA_001428005coaBC.pdbA:Delta G(T) = -109.4 *(1-(T+273.15)/ 333.59 )+ 2.68 *( 60.4 -T)+ 2.68 *(T+273.15)*log((T+273.15)/ 333.59 )
GCA_001428075coaBC.pdbA:Delta G(T) = -107.9 *(1-(T+273.15)/ 334.49 )+ 2.27 *( 61.3 -T)+ 2.27 *(T+273.15)*log((T+273.15)/ 334.49 )
GCA_001428325coaBC.pdbA:Delta G(T) = -104.6 *(1-(T+273.15)/ 334.19 )+ 2.1 *( 61 -T)+ 2.1 *(T+273.15)*log((T+273.15)/ 334.19 )
GCA_001428335coaBC.pdbA:Delta G(T) = -101.9 *(1-(T+273.15)/ 334.88 )+ 2.33 *( 61.7 -T)+ 2.33 *(T+273.15)*log((T+273.15)/ 334.88 )
GCA_001428365coaBC.pdbA:Delta G(T) = -108.1 *(1-(T+273.15)/ 335.6 )+ 2.18 *( 62.4 -T)+ 2.18 *(T+273.15)*log((T+273.15)/ 335.6 )
GCA_001428435coaBC.pdbA:Delta G(T) = -112.6 *(1-(T+273.15)/ 332.38 )+ 2.84 *( 59.2 -T)+ 2.84 *(T+273.15)*log((T+273.15)/ 332.38 )
GCA_001445575coaBC.pdbA:Delta G(T) = -115.4 *(1-(T+273.15)/ 333.53 )+ 3.08 *( 60.4 -T)+ 3.08 *(T+273.15)*log((T+273.15)/ 333.53 )
GCA_001457025coaBC.pdbA:Delta G(T) = -113.5 *(1-(T+273.15)/ 334.7 )+ 2.58 *( 61.6 -T)+ 2.58 *(T+273.15)*log((T+273.15)/ 334.7 )
GCA_001512285coaBC.pdbA:Delta G(T) = -107.7 *(1-(T+273.15)/ 332.62 )+ 2.75 *( 59.5 -T)+ 2.75 *(T+273.15)*log((T+273.15)/ 332.62 )
GCA_001512305coaBC.pdbA:Delta G(T) = -107.1 *(1-(T+273.15)/ 337.66 )+ 2.8 *( 64.5 -T)+ 2.8 *(T+273.15)*log((T+273.15)/ 337.66 )
GCA_001542565coaBC.pdbA:Delta G(T) = -118.1 *(1-(T+273.15)/ 336.41 )+ 3.14 *( 63.3 -T)+ 3.14 *(T+273.15)*log((T+273.15)/ 336.41 )
GCA_001552075coaBC.pdbA:Delta G(T) = -97.8 *(1-(T+273.15)/ 335.36 )+ 1.74 *( 62.2 -T)+ 1.74 *(T+273.15)*log((T+273.15)/ 335.36 )
GCA_001641125coaBC.pdbA:Delta G(T) = -111.9 *(1-(T+273.15)/ 334.88 )+ 2.8 *( 61.7 -T)+ 2.8 *(T+273.15)*log((T+273.15)/ 334.88 )
GCA_001663775coaBC.pdbA:Delta G(T) = -110 *(1-(T+273.15)/ 338.21 )+ 2.73 *( 65.1 -T)+ 2.73 *(T+273.15)*log((T+273.15)/ 338.21 )
GCA_001750145coaBC.pdbA:Delta G(T) = -101.3 *(1-(T+273.15)/ 336.4 )+ 2.4 *( 63.3 -T)+ 2.4 *(T+273.15)*log((T+273.15)/ 336.4 )
GCA_001766675coaBC.pdbA:Delta G(T) = -111.5 *(1-(T+273.15)/ 329.44 )+ 2.44 *( 56.3 -T)+ 2.44 *(T+273.15)*log((T+273.15)/ 329.44 )
GCA_001854365coaBC.pdbA:Delta G(T) = -118.1 *(1-(T+273.15)/ 336.41 )+ 3.14 *( 63.3 -T)+ 3.14 *(T+273.15)*log((T+273.15)/ 336.41 )
GCA_001969265coaBC.pdbA:Delta G(T) = -106.6 *(1-(T+273.15)/ 335.02 )+ 2.66 *( 61.9 -T)+ 2.66 *(T+273.15)*log((T+273.15)/ 335.02 )
GCA_002008315coaBC.pdbA:Delta G(T) = -105.2 *(1-(T+273.15)/ 334.47 )+ 2.79 *( 61.3 -T)+ 2.79 *(T+273.15)*log((T+273.15)/ 334.47 )
GCA_002157505coaBC.pdbA:Delta G(T) = -114.4 *(1-(T+273.15)/ 332.28 )+ 2.31 *( 59.1 -T)+ 2.31 *(T+273.15)*log((T+273.15)/ 332.28 )
GCA_002157565coaBC.pdbA:Delta G(T) = -113.7 *(1-(T+273.15)/ 334.36 )+ 2.48 *( 61.2 -T)+ 2.48 *(T+273.15)*log((T+273.15)/ 334.36 )
GCA_002224285coaBC.pdbA:Delta G(T) = -113.3 *(1-(T+273.15)/ 333.95 )+ 2.7 *( 60.8 -T)+ 2.7 *(T+273.15)*log((T+273.15)/ 333.95 )
GCA_002849715coaBC.pdbA:Delta G(T) = -103 *(1-(T+273.15)/ 333.13 )+ 2.1 *( 60 -T)+ 2.1 *(T+273.15)*log((T+273.15)/ 333.13 )
GCA_002892795coaBC.pdbA:Delta G(T) = -104.4 *(1-(T+273.15)/ 333.4 )+ 2.77 *( 60.2 -T)+ 2.77 *(T+273.15)*log((T+273.15)/ 333.4 )
GCA_002892835coaBC.pdbA:Delta G(T) = -105.9 *(1-(T+273.15)/ 337.03 )+ 2.6 *( 63.9 -T)+ 2.6 *(T+273.15)*log((T+273.15)/ 337.03 )
GCA_002909415coaBC.pdbA:Delta G(T) = -109.1 *(1-(T+273.15)/ 335.15 )+ 2.66 *( 62 -T)+ 2.66 *(T+273.15)*log((T+273.15)/ 335.15 )
GCA_002929215coaBC.pdbA:Delta G(T) = -107.3 *(1-(T+273.15)/ 334.87 )+ 2.14 *( 61.7 -T)+ 2.14 *(T+273.15)*log((T+273.15)/ 334.87 )
GCA_002929255coaBC.pdbA:Delta G(T) = -109.5 *(1-(T+273.15)/ 336.03 )+ 2.53 *( 62.9 -T)+ 2.53 *(T+273.15)*log((T+273.15)/ 336.03 )
GCA_002929275coaBC.pdbA:Delta G(T) = -109.5 *(1-(T+273.15)/ 336.03 )+ 2.53 *( 62.9 -T)+ 2.53 *(T+273.15)*log((T+273.15)/ 336.03 )
GCA_002929295coaBC.pdbA:Delta G(T) = -113.9 *(1-(T+273.15)/ 332.63 )+ 2.53 *( 59.5 -T)+ 2.53 *(T+273.15)*log((T+273.15)/ 332.63 )
GCA_002929305coaBC.pdbA:Delta G(T) = -105.2 *(1-(T+273.15)/ 334.6 )+ 2.89 *( 61.5 -T)+ 2.89 *(T+273.15)*log((T+273.15)/ 334.6 )
GCA_002929335coaBC.pdbA:Delta G(T) = -103.2 *(1-(T+273.15)/ 333.62 )+ 2.62 *( 60.5 -T)+ 2.62 *(T+273.15)*log((T+273.15)/ 333.62 )
GCA_002929355coaBC.pdbA:Delta G(T) = -105.1 *(1-(T+273.15)/ 334.68 )+ 2.14 *( 61.5 -T)+ 2.14 *(T+273.15)*log((T+273.15)/ 334.68 )
GCA_002929375coaBC.pdbA:Delta G(T) = -111 *(1-(T+273.15)/ 336.91 )+ 2.24 *( 63.8 -T)+ 2.24 *(T+273.15)*log((T+273.15)/ 336.91 )
GCA_002929385coaBC.pdbA:Delta G(T) = -106.9 *(1-(T+273.15)/ 336.02 )+ 2.28 *( 62.9 -T)+ 2.28 *(T+273.15)*log((T+273.15)/ 336.02 )
GCA_002929455coaBC.pdbA:Delta G(T) = -111.8 *(1-(T+273.15)/ 335.52 )+ 2.43 *( 62.4 -T)+ 2.43 *(T+273.15)*log((T+273.15)/ 335.52 )
GCA_002929705coaBC.pdbA:Delta G(T) = -109.1 *(1-(T+273.15)/ 334.69 )+ 3.18 *( 61.5 -T)+ 3.18 *(T+273.15)*log((T+273.15)/ 334.69 )
GCA_002929745coaBC.pdbA:Delta G(T) = -98.1 *(1-(T+273.15)/ 333.99 )+ 2.19 *( 60.8 -T)+ 2.19 *(T+273.15)*log((T+273.15)/ 333.99 )
GCA_002929755coaBC.pdbA:Delta G(T) = -100.5 *(1-(T+273.15)/ 334.93 )+ 2.23 *( 61.8 -T)+ 2.23 *(T+273.15)*log((T+273.15)/ 334.93 )
GCA_002934405coaBC.pdbA:Delta G(T) = -103.6 *(1-(T+273.15)/ 336.47 )+ 2.92 *( 63.3 -T)+ 2.92 *(T+273.15)*log((T+273.15)/ 336.47 )
GCA_002953935coaBC.pdbA:Delta G(T) = -108.4 *(1-(T+273.15)/ 335.07 )+ 2.57 *( 61.9 -T)+ 2.57 *(T+273.15)*log((T+273.15)/ 335.07 )
GCA_002954225coaBC.pdbA:Delta G(T) = -111 *(1-(T+273.15)/ 332.65 )+ 2.51 *( 59.5 -T)+ 2.51 *(T+273.15)*log((T+273.15)/ 332.65 )
GCA_003097355coaBC.pdbA:Delta G(T) = -105.4 *(1-(T+273.15)/ 335.93 )+ 2.68 *( 62.8 -T)+ 2.68 *(T+273.15)*log((T+273.15)/ 335.93 )
GCA_003116525coaBC.pdbA:Delta G(T) = -101.1 *(1-(T+273.15)/ 333.98 )+ 2.35 *( 60.8 -T)+ 2.35 *(T+273.15)*log((T+273.15)/ 333.98 )
GCA_003185915coaBC.pdbA:Delta G(T) = -110.3 *(1-(T+273.15)/ 332.95 )+ 2.87 *( 59.8 -T)+ 2.87 *(T+273.15)*log((T+273.15)/ 332.95 )
GCA_003208335coaBC.pdbA:Delta G(T) = -113.1 *(1-(T+273.15)/ 335.04 )+ 2.48 *( 61.9 -T)+ 2.48 *(T+273.15)*log((T+273.15)/ 335.04 )
GCA_003219795coaBC.pdbA:Delta G(T) = -107.3 *(1-(T+273.15)/ 331.83 )+ 2.66 *( 58.7 -T)+ 2.66 *(T+273.15)*log((T+273.15)/ 331.83 )
GCA_003219815coaBC.pdbA:Delta G(T) = -104.6 *(1-(T+273.15)/ 333.12 )+ 2.93 *( 60 -T)+ 2.93 *(T+273.15)*log((T+273.15)/ 333.12 )
GCA_003268655coaBC.pdbA:Delta G(T) = -111.3 *(1-(T+273.15)/ 335.33 )+ 3.16 *( 62.2 -T)+ 3.16 *(T+273.15)*log((T+273.15)/ 335.33 )
GCA_003287955coaBC.pdbA:Delta G(T) = -103.1 *(1-(T+273.15)/ 335.75 )+ 2.53 *( 62.6 -T)+ 2.53 *(T+273.15)*log((T+273.15)/ 335.75 )
GCA_900016675coaBC.pdbA:Delta G(T) = -113.8 *(1-(T+273.15)/ 337.38 )+ 2.05 *( 64.2 -T)+ 2.05 *(T+273.15)*log((T+273.15)/ 337.38 )
GCA_900099735coaBC.pdbA:Delta G(T) = -115.2 *(1-(T+273.15)/ 333.81 )+ 2.1 *( 60.7 -T)+ 2.1 *(T+273.15)*log((T+273.15)/ 333.81 )
GCA_900099975coaBC.pdbA:Delta G(T) = -119.4 *(1-(T+273.15)/ 330.51 )+ 2.43 *( 57.4 -T)+ 2.43 *(T+273.15)*log((T+273.15)/ 330.51 )
GCA_900102785coaBC.pdbA:Delta G(T) = -104 *(1-(T+273.15)/ 334.37 )+ 2.23 *( 61.2 -T)+ 2.23 *(T+273.15)*log((T+273.15)/ 334.37 )
GCA_900102805coaBC.pdbA:Delta G(T) = -114.5 *(1-(T+273.15)/ 333.97 )+ 2.43 *( 60.8 -T)+ 2.43 *(T+273.15)*log((T+273.15)/ 333.97 )
GCA_900102895coaBC.pdbA:Delta G(T) = -99.9 *(1-(T+273.15)/ 335.3 )+ 2.5 *( 62.1 -T)+ 2.5 *(T+273.15)*log((T+273.15)/ 335.3 )
GCA_900104405coaBC.pdbA:Delta G(T) = -104.4 *(1-(T+273.15)/ 335.42 )+ 2.6 *( 62.3 -T)+ 2.6 *(T+273.15)*log((T+273.15)/ 335.42 )
GCA_900105345coaBC.pdbA:Delta G(T) = -100.9 *(1-(T+273.15)/ 331.12 )+ 1.96 *( 58 -T)+ 1.96 *(T+273.15)*log((T+273.15)/ 331.12 )
GCA_900105535coaBC.pdbA:Delta G(T) = -116.1 *(1-(T+273.15)/ 339.14 )+ 2.7 *( 66 -T)+ 2.7 *(T+273.15)*log((T+273.15)/ 339.14 )
GCA_900106835coaBC.pdbA:Delta G(T) = -119.3 *(1-(T+273.15)/ 333.59 )+ 2.86 *( 60.4 -T)+ 2.86 *(T+273.15)*log((T+273.15)/ 333.59 )
GCA_900110595coaBC.pdbA:Delta G(T) = -110.6 *(1-(T+273.15)/ 336.89 )+ 2.6 *( 63.7 -T)+ 2.6 *(T+273.15)*log((T+273.15)/ 336.89 )
GCA_900116495coaBC.pdbA:Delta G(T) = -105.1 *(1-(T+273.15)/ 334.43 )+ 2.47 *( 61.3 -T)+ 2.47 *(T+273.15)*log((T+273.15)/ 334.43 )
GCA_900168135coaBC.pdbA:Delta G(T) = -106.6 *(1-(T+273.15)/ 335.6 )+ 2.52 *( 62.5 -T)+ 2.52 *(T+273.15)*log((T+273.15)/ 335.6 )
GCA_900168225coaBC.pdbA:Delta G(T) = -113.6 *(1-(T+273.15)/ 333.3 )+ 2.43 *( 60.1 -T)+ 2.43 *(T+273.15)*log((T+273.15)/ 333.3 )
GCA_000014925coaBC.pdbA:Delta G(T) = -117.9 *(1-(T+273.15)/ 334.04 )+ 2.9 *( 60.9 -T)+ 2.9 *(T+273.15)*log((T+273.15)/ 334.04 )
GCA_000022025coaBC.pdbA:Delta G(T) = -115 *(1-(T+273.15)/ 337.46 )+ 2.47 *( 64.3 -T)+ 2.47 *(T+273.15)*log((T+273.15)/ 337.46 )
GCA_000189535coaBC.pdbA:Delta G(T) = -106.5 *(1-(T+273.15)/ 334.88 )+ 2.58 *( 61.7 -T)+ 2.58 *(T+273.15)*log((T+273.15)/ 334.88 )
GCA_000196235coaBC.pdbA:Delta G(T) = -104.9 *(1-(T+273.15)/ 333.99 )+ 2.94 *( 60.8 -T)+ 2.94 *(T+273.15)*log((T+273.15)/ 333.99 )
GCA_000238915coaBC.pdbA:Delta G(T) = -95.8 *(1-(T+273.15)/ 334.54 )+ 2.43 *( 61.4 -T)+ 2.43 *(T+273.15)*log((T+273.15)/ 334.54 )
GCA_000281065coaBC.pdbA:Delta G(T) = -114.6 *(1-(T+273.15)/ 331.34 )+ 2.83 *( 58.2 -T)+ 2.83 *(T+273.15)*log((T+273.15)/ 331.34 )
GCA_000294595coaBC.pdbA:Delta G(T) = -122.6 *(1-(T+273.15)/ 331.75 )+ 2.4 *( 58.6 -T)+ 2.4 *(T+273.15)*log((T+273.15)/ 331.75 )
GCA_000294695coaBC.pdbA:Delta G(T) = -117.9 *(1-(T+273.15)/ 334.04 )+ 2.9 *( 60.9 -T)+ 2.9 *(T+273.15)*log((T+273.15)/ 334.04 )
GCA_000332815coaBC.pdbA:Delta G(T) = -109.2 *(1-(T+273.15)/ 335.03 )+ 2.41 *( 61.9 -T)+ 2.41 *(T+273.15)*log((T+273.15)/ 335.03 )
GCA_000374865coaBC.pdbA:Delta G(T) = -103.7 *(1-(T+273.15)/ 333.52 )+ 2.33 *( 60.4 -T)+ 2.33 *(T+273.15)*log((T+273.15)/ 333.52 )
GCA_000374905coaBC.pdbA:Delta G(T) = -104.6 *(1-(T+273.15)/ 334.19 )+ 2.1 *( 61 -T)+ 2.1 *(T+273.15)*log((T+273.15)/ 334.19 )
GCA_000374925coaBC.pdbA:Delta G(T) = -108.9 *(1-(T+273.15)/ 335.72 )+ 2.59 *( 62.6 -T)+ 2.59 *(T+273.15)*log((T+273.15)/ 335.72 )
GCA_000014925.faa_coaD.pdbA:Delta G(T) = -95.2 *(1-(T+273.15)/ 336.42 )+ 1.17 *( 63.3 -T)+ 1.17 *(T+273.15)*log((T+273.15)/ 336.42 )
GCA_000022025.faa_coaD.pdbA:Delta G(T) = -99.9 *(1-(T+273.15)/ 337.58 )+ 1.25 *( 64.4 -T)+ 1.25 *(T+273.15)*log((T+273.15)/ 337.58 )
GCA_000189535.faa_coaD.pdbA:Delta G(T) = -98.3 *(1-(T+273.15)/ 336.29 )+ 1.44 *( 63.1 -T)+ 1.44 *(T+273.15)*log((T+273.15)/ 336.29 )
GCA_000196235.faa_coaD.pdbA:Delta G(T) = -96.1 *(1-(T+273.15)/ 332.62 )+ 1.31 *( 59.5 -T)+ 1.31 *(T+273.15)*log((T+273.15)/ 332.62 )
GCA_000238915.faa_coaD.pdbA:Delta G(T) = -97.7 *(1-(T+273.15)/ 334.53 )+ 1.29 *( 61.4 -T)+ 1.29 *(T+273.15)*log((T+273.15)/ 334.53 )
GCA_000281065.faa_coaD.pdbA:Delta G(T) = -95.7 *(1-(T+273.15)/ 337.07 )+ 1.2 *( 63.9 -T)+ 1.2 *(T+273.15)*log((T+273.15)/ 337.07 )
GCA_000294595.faa_coaD.pdbA:Delta G(T) = -98.1 *(1-(T+273.15)/ 338.47 )+ 1.36 *( 65.3 -T)+ 1.36 *(T+273.15)*log((T+273.15)/ 338.47 )
GCA_000294695.faa_coaD.pdbA:Delta G(T) = -95.2 *(1-(T+273.15)/ 336.42 )+ 1.17 *( 63.3 -T)+ 1.17 *(T+273.15)*log((T+273.15)/ 336.42 )
GCA_000332815.faa_coaD.pdbA:Delta G(T) = -98.2 *(1-(T+273.15)/ 335.07 )+ 1.44 *( 61.9 -T)+ 1.44 *(T+273.15)*log((T+273.15)/ 335.07 )
GCA_000374865.faa_coaD.pdbA:Delta G(T) = -98.8 *(1-(T+273.15)/ 336.57 )+ 1.35 *( 63.4 -T)+ 1.35 *(T+273.15)*log((T+273.15)/ 336.57 )
GCA_000374905.faa_coaD.pdbA:Delta G(T) = -96.5 *(1-(T+273.15)/ 336.79 )+ 1.26 *( 63.6 -T)+ 1.26 *(T+273.15)*log((T+273.15)/ 336.79 )
GCA_000374925.faa_coaD.pdbA:Delta G(T) = -97.1 *(1-(T+273.15)/ 336.74 )+ 1.18 *( 63.6 -T)+ 1.18 *(T+273.15)*log((T+273.15)/ 336.74 )
GCA_000374945.faa_coaD.pdbA:Delta G(T) = -95.4 *(1-(T+273.15)/ 336.65 )+ 1.19 *( 63.5 -T)+ 1.19 *(T+273.15)*log((T+273.15)/ 336.65 )
GCA_000468215.faa_coaD.pdbA:Delta G(T) = -97 *(1-(T+273.15)/ 339.81 )+ 0.49 *( 66.7 -T)+ 0.49 *(T+273.15)*log((T+273.15)/ 339.81 )
GCA_000482545.faa_coaD.pdbA:Delta G(T) = -95.9 *(1-(T+273.15)/ 337.32 )+ 1.31 *( 64.2 -T)+ 1.31 *(T+273.15)*log((T+273.15)/ 337.32 )
GCA_000514015.faa_coaD.pdbA:Delta G(T) = -90.1 *(1-(T+273.15)/ 340.43 )+ 0.13 *( 67.3 -T)+ 0.13 *(T+273.15)*log((T+273.15)/ 340.43 )
GCA_000514155.faa_coaD.pdbA:Delta G(T) = -90.1 *(1-(T+273.15)/ 340.43 )+ 0.13 *( 67.3 -T)+ 0.13 *(T+273.15)*log((T+273.15)/ 340.43 )
GCA_000517125.faa_coaD.pdbA:Delta G(T) = -94 *(1-(T+273.15)/ 338.44 )+ 1.24 *( 65.3 -T)+ 1.24 *(T+273.15)*log((T+273.15)/ 338.44 )
GCA_000520555.faa_coaD.pdbA:Delta G(T) = -101.5 *(1-(T+273.15)/ 335.99 )+ 1.56 *( 62.8 -T)+ 1.56 *(T+273.15)*log((T+273.15)/ 335.99 )
GCA_000520575.faa_coaD.pdbA:Delta G(T) = -101.5 *(1-(T+273.15)/ 335.99 )+ 1.56 *( 62.8 -T)+ 1.56 *(T+273.15)*log((T+273.15)/ 335.99 )
GCA_000520595.faa_coaD.pdbA:Delta G(T) = -99.6 *(1-(T+273.15)/ 335.58 )+ 1.47 *( 62.4 -T)+ 1.47 *(T+273.15)*log((T+273.15)/ 335.58 )
GCA_000620385.faa_coaD.pdbA:Delta G(T) = -97.1 *(1-(T+273.15)/ 336.74 )+ 1.18 *( 63.6 -T)+ 1.18 *(T+273.15)*log((T+273.15)/ 336.74 )
GCA_000685965.faa_coaD.pdbA:Delta G(T) = -93.7 *(1-(T+273.15)/ 340.47 )+ 0.37 *( 67.3 -T)+ 0.37 *(T+273.15)*log((T+273.15)/ 340.47 )
GCA_000755585.faa_coaD.pdbA:Delta G(T) = -97.3 *(1-(T+273.15)/ 335.53 )+ 1.38 *( 62.4 -T)+ 1.38 *(T+273.15)*log((T+273.15)/ 335.53 )
GCA_000785535.faa_coaD.pdbA:Delta G(T) = -96.1 *(1-(T+273.15)/ 334.18 )+ 1.6 *( 61 -T)+ 1.6 *(T+273.15)*log((T+273.15)/ 334.18 )
GCA_000813845.faa_coaD.pdbA:Delta G(T) = -96.3 *(1-(T+273.15)/ 338.99 )+ 1.29 *( 65.8 -T)+ 1.29 *(T+273.15)*log((T+273.15)/ 338.99 )
GCA_000816565.faa_coaD.pdbA:Delta G(T) = -101.5 *(1-(T+273.15)/ 337.08 )+ 1.37 *( 63.9 -T)+ 1.37 *(T+273.15)*log((T+273.15)/ 337.08 )
GCA_000876655.faa_coaD.pdbA:Delta G(T) = -96.4 *(1-(T+273.15)/ 333.27 )+ 1.25 *( 60.1 -T)+ 1.25 *(T+273.15)*log((T+273.15)/ 333.27 )
GCA_000962805.faa_coaD.pdbA:Delta G(T) = -99.9 *(1-(T+273.15)/ 337.58 )+ 1.25 *( 64.4 -T)+ 1.25 *(T+273.15)*log((T+273.15)/ 337.58 )
GCA_001046895.faa_coaD.pdbA:Delta G(T) = -90 *(1-(T+273.15)/ 337.79 )+ 0.33 *( 64.6 -T)+ 0.33 *(T+273.15)*log((T+273.15)/ 337.79 )
GCA_001187915.faa_coaD.pdbA:Delta G(T) = -106.9 *(1-(T+273.15)/ 336.85 )+ 1.55 *( 63.7 -T)+ 1.55 *(T+273.15)*log((T+273.15)/ 336.85 )
GCA_001238605.faa_coaD.pdbA:Delta G(T) = -99.9 *(1-(T+273.15)/ 336.63 )+ 1.53 *( 63.5 -T)+ 1.53 *(T+273.15)*log((T+273.15)/ 336.63 )
GCA_001281315.faa_coaD.pdbA:Delta G(T) = -96.2 *(1-(T+273.15)/ 337.35 )+ 1.27 *( 64.2 -T)+ 1.27 *(T+273.15)*log((T+273.15)/ 337.35 )
GCA_001294625.faa_coaD.pdbA:Delta G(T) = -93.2 *(1-(T+273.15)/ 339.78 )+ 0.29 *( 66.6 -T)+ 0.29 *(T+273.15)*log((T+273.15)/ 339.78 )
GCA_001307035.faa_coaD.pdbA:Delta G(T) = -98.6 *(1-(T+273.15)/ 343.24 )+ 0.4 *( 70.1 -T)+ 0.4 *(T+273.15)*log((T+273.15)/ 343.24 )
GCA_001373495.faa_coaD.pdbA:Delta G(T) = -99.3 *(1-(T+273.15)/ 340.59 )+ 0.51 *( 67.4 -T)+ 0.51 *(T+273.15)*log((T+273.15)/ 340.59 )
GCA_001422645.faa_coaD.pdbA:Delta G(T) = -96.9 *(1-(T+273.15)/ 335.52 )+ 1.28 *( 62.4 -T)+ 1.28 *(T+273.15)*log((T+273.15)/ 335.52 )
GCA_001422665.faa_coaD.pdbA:Delta G(T) = -100 *(1-(T+273.15)/ 338.17 )+ 1.27 *( 65 -T)+ 1.27 *(T+273.15)*log((T+273.15)/ 338.17 )
GCA_001423525.faa_coaD.pdbA:Delta G(T) = -99.9 *(1-(T+273.15)/ 337.58 )+ 1.25 *( 64.4 -T)+ 1.25 *(T+273.15)*log((T+273.15)/ 337.58 )
GCA_001423745.faa_coaD.pdbA:Delta G(T) = -94.1 *(1-(T+273.15)/ 339.34 )+ 0.52 *( 66.2 -T)+ 0.52 *(T+273.15)*log((T+273.15)/ 339.34 )
GCA_001424565.faa_coaD.pdbA:Delta G(T) = -99.9 *(1-(T+273.15)/ 336.63 )+ 1.53 *( 63.5 -T)+ 1.53 *(T+273.15)*log((T+273.15)/ 336.63 )
GCA_001428005.faa_coaD.pdbA:Delta G(T) = -97.4 *(1-(T+273.15)/ 336.1 )+ 1.19 *( 62.9 -T)+ 1.19 *(T+273.15)*log((T+273.15)/ 336.1 )
GCA_001428075.faa_coaD.pdbA:Delta G(T) = -97.7 *(1-(T+273.15)/ 337.01 )+ 1.26 *( 63.9 -T)+ 1.26 *(T+273.15)*log((T+273.15)/ 337.01 )
GCA_001428325.faa_coaD.pdbA:Delta G(T) = -96.7 *(1-(T+273.15)/ 336.89 )+ 1.2 *( 63.7 -T)+ 1.2 *(T+273.15)*log((T+273.15)/ 336.89 )
GCA_001428335.faa_coaD.pdbA:Delta G(T) = -100.3 *(1-(T+273.15)/ 333.32 )+ 1.47 *( 60.2 -T)+ 1.47 *(T+273.15)*log((T+273.15)/ 333.32 )
GCA_001428365.faa_coaD.pdbA:Delta G(T) = -97.4 *(1-(T+273.15)/ 335.08 )+ 1.09 *( 61.9 -T)+ 1.09 *(T+273.15)*log((T+273.15)/ 335.08 )
GCA_001428435.faa_coaD.pdbA:Delta G(T) = -100.5 *(1-(T+273.15)/ 335.44 )+ 1.3 *( 62.3 -T)+ 1.3 *(T+273.15)*log((T+273.15)/ 335.44 )
GCA_001445575.faa_coaD.pdbA:Delta G(T) = -97.1 *(1-(T+273.15)/ 335.3 )+ 1.43 *( 62.1 -T)+ 1.43 *(T+273.15)*log((T+273.15)/ 335.3 )
GCA_001457025.faa_coaD.pdbA:Delta G(T) = -100.3 *(1-(T+273.15)/ 337.94 )+ 1.32 *( 64.8 -T)+ 1.32 *(T+273.15)*log((T+273.15)/ 337.94 )
GCA_001512285.faa_coaD.pdbA:Delta G(T) = -95.9 *(1-(T+273.15)/ 337.73 )+ 1.2 *( 64.6 -T)+ 1.2 *(T+273.15)*log((T+273.15)/ 337.73 )
GCA_001512305.faa_coaD.pdbA:Delta G(T) = -95.1 *(1-(T+273.15)/ 335.3 )+ 1.17 *( 62.2 -T)+ 1.17 *(T+273.15)*log((T+273.15)/ 335.3 )
GCA_001542565.faa_coaD.pdbA:Delta G(T) = -95.4 *(1-(T+273.15)/ 337.47 )+ 1.13 *( 64.3 -T)+ 1.13 *(T+273.15)*log((T+273.15)/ 337.47 )
GCA_001552075.faa_coaD.pdbA:Delta G(T) = -103.8 *(1-(T+273.15)/ 338.4 )+ 1.39 *( 65.2 -T)+ 1.39 *(T+273.15)*log((T+273.15)/ 338.4 )
GCA_001641125.faa_coaD.pdbA:Delta G(T) = -90.8 *(1-(T+273.15)/ 340.98 )+ 0.24 *( 67.8 -T)+ 0.24 *(T+273.15)*log((T+273.15)/ 340.98 )
GCA_001663775.faa_coaD.pdbA:Delta G(T) = -97 *(1-(T+273.15)/ 335.95 )+ 1.42 *( 62.8 -T)+ 1.42 *(T+273.15)*log((T+273.15)/ 335.95 )
GCA_001750145.faa_coaD.pdbA:Delta G(T) = -95.5 *(1-(T+273.15)/ 333.81 )+ 1.23 *( 60.7 -T)+ 1.23 *(T+273.15)*log((T+273.15)/ 333.81 )
GCA_001766675.faa_coaD.pdbA:Delta G(T) = -95.7 *(1-(T+273.15)/ 335.6 )+ 1.27 *( 62.5 -T)+ 1.27 *(T+273.15)*log((T+273.15)/ 335.6 )
GCA_001854365.faa_coaD.pdbA:Delta G(T) = -95.4 *(1-(T+273.15)/ 337.47 )+ 1.13 *( 64.3 -T)+ 1.13 *(T+273.15)*log((T+273.15)/ 337.47 )
GCA_001969265.faa_coaD.pdbA:Delta G(T) = -90.7 *(1-(T+273.15)/ 342.2 )+ 0.15 *( 69 -T)+ 0.15 *(T+273.15)*log((T+273.15)/ 342.2 )
GCA_002008315.faa_coaD.pdbA:Delta G(T) = -97.5 *(1-(T+273.15)/ 335.8 )+ 1.18 *( 62.7 -T)+ 1.18 *(T+273.15)*log((T+273.15)/ 335.8 )
GCA_002157505.faa_coaD.pdbA:Delta G(T) = -99.4 *(1-(T+273.15)/ 335.48 )+ 1.27 *( 62.3 -T)+ 1.27 *(T+273.15)*log((T+273.15)/ 335.48 )
GCA_002157565.faa_coaD.pdbA:Delta G(T) = -102.2 *(1-(T+273.15)/ 337.91 )+ 1.43 *( 64.8 -T)+ 1.43 *(T+273.15)*log((T+273.15)/ 337.91 )
GCA_002224285.faa_coaD.pdbA:Delta G(T) = -96.9 *(1-(T+273.15)/ 338.86 )+ 1.3 *( 65.7 -T)+ 1.3 *(T+273.15)*log((T+273.15)/ 338.86 )
GCA_002849715.faa_coaD.pdbA:Delta G(T) = -95.1 *(1-(T+273.15)/ 343.94 )+ 0.48 *( 70.8 -T)+ 0.48 *(T+273.15)*log((T+273.15)/ 343.94 )
GCA_002892795.faa_coaD.pdbA:Delta G(T) = -90.1 *(1-(T+273.15)/ 341.69 )+ 0.2 *( 68.5 -T)+ 0.2 *(T+273.15)*log((T+273.15)/ 341.69 )
GCA_002892835.faa_coaD.pdbA:Delta G(T) = -100.3 *(1-(T+273.15)/ 337.91 )+ 1.31 *( 64.8 -T)+ 1.31 *(T+273.15)*log((T+273.15)/ 337.91 )
GCA_002909415.faa_coaD.pdbA:Delta G(T) = -96.9 *(1-(T+273.15)/ 336.32 )+ 1.38 *( 63.2 -T)+ 1.38 *(T+273.15)*log((T+273.15)/ 336.32 )
GCA_002929215.faa_coaD.pdbA:Delta G(T) = -97.3 *(1-(T+273.15)/ 331.94 )+ 1.36 *( 58.8 -T)+ 1.36 *(T+273.15)*log((T+273.15)/ 331.94 )
GCA_002929255.faa_coaD.pdbA:Delta G(T) = -99.6 *(1-(T+273.15)/ 341.54 )+ 0.16 *( 68.4 -T)+ 0.16 *(T+273.15)*log((T+273.15)/ 341.54 )
GCA_002929275.faa_coaD.pdbA:Delta G(T) = -99.6 *(1-(T+273.15)/ 341.54 )+ 0.16 *( 68.4 -T)+ 0.16 *(T+273.15)*log((T+273.15)/ 341.54 )
GCA_002929295.faa_coaD.pdbA:Delta G(T) = -99.1 *(1-(T+273.15)/ 337.54 )+ 1.18 *( 64.4 -T)+ 1.18 *(T+273.15)*log((T+273.15)/ 337.54 )
GCA_002929305.faa_coaD.pdbA:Delta G(T) = -90.3 *(1-(T+273.15)/ 337.48 )+ 0.41 *( 64.3 -T)+ 0.41 *(T+273.15)*log((T+273.15)/ 337.48 )
GCA_002929335.faa_coaD.pdbA:Delta G(T) = -96 *(1-(T+273.15)/ 332.65 )+ 1.39 *( 59.5 -T)+ 1.39 *(T+273.15)*log((T+273.15)/ 332.65 )
GCA_002929355.faa_coaD.pdbA:Delta G(T) = -95 *(1-(T+273.15)/ 336.77 )+ 1.37 *( 63.6 -T)+ 1.37 *(T+273.15)*log((T+273.15)/ 336.77 )
GCA_002929375.faa_coaD.pdbA:Delta G(T) = -99.7 *(1-(T+273.15)/ 338.58 )+ 1.33 *( 65.4 -T)+ 1.33 *(T+273.15)*log((T+273.15)/ 338.58 )
GCA_002929385.faa_coaD.pdbA:Delta G(T) = -99.6 *(1-(T+273.15)/ 341.54 )+ 0.16 *( 68.4 -T)+ 0.16 *(T+273.15)*log((T+273.15)/ 341.54 )
GCA_002929455.faa_coaD.pdbA:Delta G(T) = -99.6 *(1-(T+273.15)/ 341.54 )+ 0.16 *( 68.4 -T)+ 0.16 *(T+273.15)*log((T+273.15)/ 341.54 )
GCA_002929705.faa_coaD.pdbA:Delta G(T) = -91.9 *(1-(T+273.15)/ 338.59 )+ 0.44 *( 65.4 -T)+ 0.44 *(T+273.15)*log((T+273.15)/ 338.59 )
GCA_002929745.faa_coaD.pdbA:Delta G(T) = -92.6 *(1-(T+273.15)/ 339.81 )+ 0.25 *( 66.7 -T)+ 0.25 *(T+273.15)*log((T+273.15)/ 339.81 )
GCA_002929755.faa_coaD.pdbA:Delta G(T) = -99.6 *(1-(T+273.15)/ 333.42 )+ 1.44 *( 60.3 -T)+ 1.44 *(T+273.15)*log((T+273.15)/ 333.42 )
GCA_002934405.faa_coaD.pdbA:Delta G(T) = -97.6 *(1-(T+273.15)/ 334.5 )+ 1.45 *( 61.4 -T)+ 1.45 *(T+273.15)*log((T+273.15)/ 334.5 )
GCA_002953935.faa_coaD.pdbA:Delta G(T) = -101.1 *(1-(T+273.15)/ 335.07 )+ 1.52 *( 61.9 -T)+ 1.52 *(T+273.15)*log((T+273.15)/ 335.07 )
GCA_002954225.faa_coaD.pdbA:Delta G(T) = -95.7 *(1-(T+273.15)/ 337.53 )+ 1.59 *( 64.4 -T)+ 1.59 *(T+273.15)*log((T+273.15)/ 337.53 )
GCA_003097355.faa_coaD.pdbA:Delta G(T) = -95.8 *(1-(T+273.15)/ 336.95 )+ 1.21 *( 63.8 -T)+ 1.21 *(T+273.15)*log((T+273.15)/ 336.95 )
GCA_003116525.faa_coaD.pdbA:Delta G(T) = -98.8 *(1-(T+273.15)/ 336.57 )+ 1.35 *( 63.4 -T)+ 1.35 *(T+273.15)*log((T+273.15)/ 336.57 )
GCA_003185915.faa_coaD.pdbA:Delta G(T) = -91.6 *(1-(T+273.15)/ 337.68 )+ 0.45 *( 64.5 -T)+ 0.45 *(T+273.15)*log((T+273.15)/ 337.68 )
GCA_003208335.faa_coaD.pdbA:Delta G(T) = -99.3 *(1-(T+273.15)/ 336 )+ 1.39 *( 62.9 -T)+ 1.39 *(T+273.15)*log((T+273.15)/ 336 )
GCA_003219795.faa_coaD.pdbA:Delta G(T) = -91.6 *(1-(T+273.15)/ 339.65 )+ 0.34 *( 66.5 -T)+ 0.34 *(T+273.15)*log((T+273.15)/ 339.65 )
GCA_003219815.faa_coaD.pdbA:Delta G(T) = -97.6 *(1-(T+273.15)/ 337.12 )+ 1.34 *( 64 -T)+ 1.34 *(T+273.15)*log((T+273.15)/ 337.12 )
GCA_003268655.faa_coaD.pdbA:Delta G(T) = -97.1 *(1-(T+273.15)/ 337.2 )+ 1.36 *( 64 -T)+ 1.36 *(T+273.15)*log((T+273.15)/ 337.2 )
GCA_003287955.faa_coaD.pdbA:Delta G(T) = -99.2 *(1-(T+273.15)/ 334.05 )+ 1.47 *( 60.9 -T)+ 1.47 *(T+273.15)*log((T+273.15)/ 334.05 )
GCA_900016675.faa_coaD.pdbA:Delta G(T) = -96.5 *(1-(T+273.15)/ 339.33 )+ 1.3 *( 66.2 -T)+ 1.3 *(T+273.15)*log((T+273.15)/ 339.33 )
GCA_900099735.faa_coaD.pdbA:Delta G(T) = -99 *(1-(T+273.15)/ 334.17 )+ 1.33 *( 61 -T)+ 1.33 *(T+273.15)*log((T+273.15)/ 334.17 )
GCA_900099975.faa_coaD.pdbA:Delta G(T) = -95.2 *(1-(T+273.15)/ 339.53 )+ 1.14 *( 66.4 -T)+ 1.14 *(T+273.15)*log((T+273.15)/ 339.53 )
GCA_900102785.faa_coaD.pdbA:Delta G(T) = -95.7 *(1-(T+273.15)/ 336.1 )+ 1.2 *( 63 -T)+ 1.2 *(T+273.15)*log((T+273.15)/ 336.1 )
GCA_900102805.faa_coaD.pdbA:Delta G(T) = -90.1 *(1-(T+273.15)/ 340.43 )+ 0.13 *( 67.3 -T)+ 0.13 *(T+273.15)*log((T+273.15)/ 340.43 )
GCA_900102895.faa_coaD.pdbA:Delta G(T) = -97.2 *(1-(T+273.15)/ 337.96 )+ 1.2 *( 64.8 -T)+ 1.2 *(T+273.15)*log((T+273.15)/ 337.96 )
GCA_900104405.faa_coaD.pdbA:Delta G(T) = -95.9 *(1-(T+273.15)/ 335.76 )+ 1.23 *( 62.6 -T)+ 1.23 *(T+273.15)*log((T+273.15)/ 335.76 )
GCA_900105345.faa_coaD.pdbA:Delta G(T) = -95.5 *(1-(T+273.15)/ 335.03 )+ 1.16 *( 61.9 -T)+ 1.16 *(T+273.15)*log((T+273.15)/ 335.03 )
GCA_900105535.faa_coaD.pdbA:Delta G(T) = -96.8 *(1-(T+273.15)/ 334.11 )+ 1.43 *( 61 -T)+ 1.43 *(T+273.15)*log((T+273.15)/ 334.11 )
GCA_900105965.faa_coaD.pdbA:Delta G(T) = -97.3 *(1-(T+273.15)/ 335.53 )+ 1.38 *( 62.4 -T)+ 1.38 *(T+273.15)*log((T+273.15)/ 335.53 )
GCA_900106835.faa_coaD.pdbA:Delta G(T) = -97.2 *(1-(T+273.15)/ 340.84 )+ 1.25 *( 67.7 -T)+ 1.25 *(T+273.15)*log((T+273.15)/ 340.84 )
GCA_900110595.faa_coaD.pdbA:Delta G(T) = -97.9 *(1-(T+273.15)/ 333.61 )+ 1.39 *( 60.5 -T)+ 1.39 *(T+273.15)*log((T+273.15)/ 333.61 )
GCA_900116495.faa_coaD.pdbA:Delta G(T) = -89.6 *(1-(T+273.15)/ 338.26 )+ 0.09 *( 65.1 -T)+ 0.09 *(T+273.15)*log((T+273.15)/ 338.26 )
GCA_900168135.faa_coaD.pdbA:Delta G(T) = -90 *(1-(T+273.15)/ 340.24 )+ 0.19 *( 67.1 -T)+ 0.19 *(T+273.15)*log((T+273.15)/ 340.24 )
GCA_900168225.faa_coaD.pdbA:Delta G(T) = -95.4 *(1-(T+273.15)/ 336.65 )+ 1.19 *( 63.5 -T)+ 1.19 *(T+273.15)*log((T+273.15)/ 336.65 )
GCA_000014925.faa_coaE.pdbA:Delta G(T) = -108.4 *(1-(T+273.15)/ 334.83 )+ 1.2 *( 61.7 -T)+ 1.2 *(T+273.15)*log((T+273.15)/ 334.83 )
GCA_000022025.faa_coaE.pdbA:Delta G(T) = -156.4 *(1-(T+273.15)/ 332.86 )+ 2.11 *( 59.7 -T)+ 2.11 *(T+273.15)*log((T+273.15)/ 332.86 )
GCA_000189535.faa_coaE.pdbA:Delta G(T) = -136.1 *(1-(T+273.15)/ 333.26 )+ 1.69 *( 60.1 -T)+ 1.69 *(T+273.15)*log((T+273.15)/ 333.26 )
GCA_000196235.faa_coaE.pdbA:Delta G(T) = -129.1 *(1-(T+273.15)/ 331.14 )+ 1.48 *( 58 -T)+ 1.48 *(T+273.15)*log((T+273.15)/ 331.14 )
GCA_000238915.faa_coaE.pdbA:Delta G(T) = -131.2 *(1-(T+273.15)/ 334.57 )+ 1.74 *( 61.4 -T)+ 1.74 *(T+273.15)*log((T+273.15)/ 334.57 )
GCA_000281065.faa_coaE.pdbA:Delta G(T) = -118.5 *(1-(T+273.15)/ 335.59 )+ 1.29 *( 62.4 -T)+ 1.29 *(T+273.15)*log((T+273.15)/ 335.59 )
GCA_000294595.faa_coaE.pdbA:Delta G(T) = -134 *(1-(T+273.15)/ 336.48 )+ 2.11 *( 63.3 -T)+ 2.11 *(T+273.15)*log((T+273.15)/ 336.48 )
GCA_000294695.faa_coaE.pdbA:Delta G(T) = -108.4 *(1-(T+273.15)/ 334.83 )+ 1.2 *( 61.7 -T)+ 1.2 *(T+273.15)*log((T+273.15)/ 334.83 )
GCA_000332815.faa_coaE.pdbA:Delta G(T) = -154.5 *(1-(T+273.15)/ 330.33 )+ 1.17 *( 57.2 -T)+ 1.17 *(T+273.15)*log((T+273.15)/ 330.33 )
GCA_000374865.faa_coaE.pdbA:Delta G(T) = -143 *(1-(T+273.15)/ 333.46 )+ 2.21 *( 60.3 -T)+ 2.21 *(T+273.15)*log((T+273.15)/ 333.46 )
GCA_000374905.faa_coaE.pdbA:Delta G(T) = -136.9 *(1-(T+273.15)/ 331.67 )+ 1.63 *( 58.5 -T)+ 1.63 *(T+273.15)*log((T+273.15)/ 331.67 )
GCA_000374925.faa_coaE.pdbA:Delta G(T) = -138.9 *(1-(T+273.15)/ 333.23 )+ 1.41 *( 60.1 -T)+ 1.41 *(T+273.15)*log((T+273.15)/ 333.23 )
GCA_000374945.faa_coaE.pdbA:Delta G(T) = -119.9 *(1-(T+273.15)/ 336.42 )+ 1.16 *( 63.3 -T)+ 1.16 *(T+273.15)*log((T+273.15)/ 336.42 )
GCA_000468215.faa_coaE.pdbA:Delta G(T) = -140.2 *(1-(T+273.15)/ 335.54 )+ 2.18 *( 62.4 -T)+ 2.18 *(T+273.15)*log((T+273.15)/ 335.54 )
GCA_000482545.faa_coaE.pdbA:Delta G(T) = -103.3 *(1-(T+273.15)/ 334.98 )+ 1.49 *( 61.8 -T)+ 1.49 *(T+273.15)*log((T+273.15)/ 334.98 )
GCA_000514015.faa_coaE.pdbA:Delta G(T) = -124.2 *(1-(T+273.15)/ 335.39 )+ 1.82 *( 62.2 -T)+ 1.82 *(T+273.15)*log((T+273.15)/ 335.39 )
GCA_000514155.faa_coaE.pdbA:Delta G(T) = -113.1 *(1-(T+273.15)/ 335.3 )+ 1.78 *( 62.1 -T)+ 1.78 *(T+273.15)*log((T+273.15)/ 335.3 )
GCA_000517125.faa_coaE.pdbA:Delta G(T) = -104.5 *(1-(T+273.15)/ 330.85 )+ 0.34 *( 57.7 -T)+ 0.34 *(T+273.15)*log((T+273.15)/ 330.85 )
GCA_000520555.faa_coaE.pdbA:Delta G(T) = -120.9 *(1-(T+273.15)/ 336.2 )+ 0.47 *( 63.1 -T)+ 0.47 *(T+273.15)*log((T+273.15)/ 336.2 )
GCA_000520575.faa_coaE.pdbA:Delta G(T) = -120.9 *(1-(T+273.15)/ 336.2 )+ 0.47 *( 63.1 -T)+ 0.47 *(T+273.15)*log((T+273.15)/ 336.2 )
GCA_000520595.faa_coaE.pdbA:Delta G(T) = -134.6 *(1-(T+273.15)/ 340.23 )+ 1.62 *( 67.1 -T)+ 1.62 *(T+273.15)*log((T+273.15)/ 340.23 )
GCA_000620385.faa_coaE.pdbA:Delta G(T) = -144.4 *(1-(T+273.15)/ 333.19 )+ 1.44 *( 60 -T)+ 1.44 *(T+273.15)*log((T+273.15)/ 333.19 )
GCA_000685965.faa_coaE.pdbA:Delta G(T) = -142.2 *(1-(T+273.15)/ 335.73 )+ 1.87 *( 62.6 -T)+ 1.87 *(T+273.15)*log((T+273.15)/ 335.73 )
GCA_000755585.faa_coaE.pdbA:Delta G(T) = -96.3 *(1-(T+273.15)/ 336.77 )+ 0.82 *( 63.6 -T)+ 0.82 *(T+273.15)*log((T+273.15)/ 336.77 )
GCA_000785535.faa_coaE.pdbA:Delta G(T) = -121.9 *(1-(T+273.15)/ 332.49 )+ 1.66 *( 59.3 -T)+ 1.66 *(T+273.15)*log((T+273.15)/ 332.49 )
GCA_000813845.faa_coaE.pdbA:Delta G(T) = -133.4 *(1-(T+273.15)/ 336.75 )+ 1.78 *( 63.6 -T)+ 1.78 *(T+273.15)*log((T+273.15)/ 336.75 )
GCA_000816565.faa_coaE.pdbA:Delta G(T) = -141.8 *(1-(T+273.15)/ 335.84 )+ 0.37 *( 62.7 -T)+ 0.37 *(T+273.15)*log((T+273.15)/ 335.84 )
GCA_000876655.faa_coaE.pdbA:Delta G(T) = -131 *(1-(T+273.15)/ 335.56 )+ 2.17 *( 62.4 -T)+ 2.17 *(T+273.15)*log((T+273.15)/ 335.56 )
GCA_000962805.faa_coaE.pdbA:Delta G(T) = -142 *(1-(T+273.15)/ 334.52 )+ 2.18 *( 61.4 -T)+ 2.18 *(T+273.15)*log((T+273.15)/ 334.52 )
GCA_001046895.faa_coaE.pdbA:Delta G(T) = -150.2 *(1-(T+273.15)/ 333.65 )+ 0.93 *( 60.5 -T)+ 0.93 *(T+273.15)*log((T+273.15)/ 333.65 )
GCA_001187915.faa_coaE.pdbA:Delta G(T) = -117.9 *(1-(T+273.15)/ 335.98 )+ 0.74 *( 62.8 -T)+ 0.74 *(T+273.15)*log((T+273.15)/ 335.98 )
GCA_001238605.faa_coaE.pdbA:Delta G(T) = -127.5 *(1-(T+273.15)/ 329.85 )+ 0.71 *( 56.7 -T)+ 0.71 *(T+273.15)*log((T+273.15)/ 329.85 )
GCA_001281315.faa_coaE.pdbA:Delta G(T) = -127.8 *(1-(T+273.15)/ 342.29 )+ 1.83 *( 69.1 -T)+ 1.83 *(T+273.15)*log((T+273.15)/ 342.29 )
GCA_001294625.faa_coaE.pdbA:Delta G(T) = -124.4 *(1-(T+273.15)/ 334.14 )+ 0.87 *( 61 -T)+ 0.87 *(T+273.15)*log((T+273.15)/ 334.14 )
GCA_001307035.faa_coaE.pdbA:Delta G(T) = -107.4 *(1-(T+273.15)/ 335.94 )+ 0.79 *( 62.8 -T)+ 0.79 *(T+273.15)*log((T+273.15)/ 335.94 )
GCA_001373495.faa_coaE.pdbA:Delta G(T) = -110 *(1-(T+273.15)/ 334.05 )+ 0.91 *( 60.9 -T)+ 0.91 *(T+273.15)*log((T+273.15)/ 334.05 )
GCA_001422645.faa_coaE.pdbA:Delta G(T) = -129 *(1-(T+273.15)/ 338.73 )+ 0.51 *( 65.6 -T)+ 0.51 *(T+273.15)*log((T+273.15)/ 338.73 )
GCA_001422665.faa_coaE.pdbA:Delta G(T) = -126.1 *(1-(T+273.15)/ 330.62 )+ 0.6 *( 57.5 -T)+ 0.6 *(T+273.15)*log((T+273.15)/ 330.62 )
GCA_001423525.faa_coaE.pdbA:Delta G(T) = -133.7 *(1-(T+273.15)/ 331.1 )+ 2.2 *( 57.9 -T)+ 2.2 *(T+273.15)*log((T+273.15)/ 331.1 )
GCA_001423745.faa_coaE.pdbA:Delta G(T) = -138.9 *(1-(T+273.15)/ 335.8 )+ 1.73 *( 62.7 -T)+ 1.73 *(T+273.15)*log((T+273.15)/ 335.8 )
GCA_001424565.faa_coaE.pdbA:Delta G(T) = -132.7 *(1-(T+273.15)/ 329.87 )+ 0.75 *( 56.7 -T)+ 0.75 *(T+273.15)*log((T+273.15)/ 329.87 )
GCA_001428005.faa_coaE.pdbA:Delta G(T) = -128.8 *(1-(T+273.15)/ 334.96 )+ 1.71 *( 61.8 -T)+ 1.71 *(T+273.15)*log((T+273.15)/ 334.96 )
GCA_001428075.faa_coaE.pdbA:Delta G(T) = -133.4 *(1-(T+273.15)/ 330.81 )+ 1.81 *( 57.7 -T)+ 1.81 *(T+273.15)*log((T+273.15)/ 330.81 )
GCA_001428325.faa_coaE.pdbA:Delta G(T) = -138.6 *(1-(T+273.15)/ 331.5 )+ 1.49 *( 58.3 -T)+ 1.49 *(T+273.15)*log((T+273.15)/ 331.5 )
GCA_001428335.faa_coaE.pdbA:Delta G(T) = -151.5 *(1-(T+273.15)/ 335.51 )+ 2.15 *( 62.4 -T)+ 2.15 *(T+273.15)*log((T+273.15)/ 335.51 )
GCA_001428365.faa_coaE.pdbA:Delta G(T) = -128.8 *(1-(T+273.15)/ 334.75 )+ 0.85 *( 61.6 -T)+ 0.85 *(T+273.15)*log((T+273.15)/ 334.75 )
GCA_001428435.faa_coaE.pdbA:Delta G(T) = -132 *(1-(T+273.15)/ 335.14 )+ 1.34 *( 62 -T)+ 1.34 *(T+273.15)*log((T+273.15)/ 335.14 )
GCA_001445575.faa_coaE.pdbA:Delta G(T) = -129.9 *(1-(T+273.15)/ 334.6 )+ 1.09 *( 61.4 -T)+ 1.09 *(T+273.15)*log((T+273.15)/ 334.6 )
GCA_001457025.faa_coaE.pdbA:Delta G(T) = -132.8 *(1-(T+273.15)/ 328.44 )+ 1.03 *( 55.3 -T)+ 1.03 *(T+273.15)*log((T+273.15)/ 328.44 )
GCA_001512285.faa_coaE.pdbA:Delta G(T) = -114.9 *(1-(T+273.15)/ 336.39 )+ 1.59 *( 63.2 -T)+ 1.59 *(T+273.15)*log((T+273.15)/ 336.39 )
GCA_001512305.faa_coaE.pdbA:Delta G(T) = -136.2 *(1-(T+273.15)/ 337.88 )+ 1.67 *( 64.7 -T)+ 1.67 *(T+273.15)*log((T+273.15)/ 337.88 )
GCA_001542565.faa_coaE.pdbA:Delta G(T) = -110.8 *(1-(T+273.15)/ 338.11 )+ 0.8 *( 65 -T)+ 0.8 *(T+273.15)*log((T+273.15)/ 338.11 )
GCA_001552075.faa_coaE.pdbA:Delta G(T) = -110 *(1-(T+273.15)/ 335.49 )+ 0.9 *( 62.3 -T)+ 0.9 *(T+273.15)*log((T+273.15)/ 335.49 )
GCA_001641125.faa_coaE.pdbA:Delta G(T) = -131.7 *(1-(T+273.15)/ 334.76 )+ 1.05 *( 61.6 -T)+ 1.05 *(T+273.15)*log((T+273.15)/ 334.76 )
GCA_001663775.faa_coaE.pdbA:Delta G(T) = -154 *(1-(T+273.15)/ 336.32 )+ 1.88 *( 63.2 -T)+ 1.88 *(T+273.15)*log((T+273.15)/ 336.32 )
GCA_001750145.faa_coaE.pdbA:Delta G(T) = -127.3 *(1-(T+273.15)/ 336.78 )+ 1.35 *( 63.6 -T)+ 1.35 *(T+273.15)*log((T+273.15)/ 336.78 )
GCA_001766675.faa_coaE.pdbA:Delta G(T) = -124.5 *(1-(T+273.15)/ 333.77 )+ 1.11 *( 60.6 -T)+ 1.11 *(T+273.15)*log((T+273.15)/ 333.77 )
GCA_001854365.faa_coaE.pdbA:Delta G(T) = -106.1 *(1-(T+273.15)/ 336.04 )+ 0.57 *( 62.9 -T)+ 0.57 *(T+273.15)*log((T+273.15)/ 336.04 )
GCA_001969265.faa_coaE.pdbA:Delta G(T) = -143.4 *(1-(T+273.15)/ 333.48 )+ 1.48 *( 60.3 -T)+ 1.48 *(T+273.15)*log((T+273.15)/ 333.48 )
GCA_002008315.faa_coaE.pdbA:Delta G(T) = -159.2 *(1-(T+273.15)/ 336.64 )+ 2.1 *( 63.5 -T)+ 2.1 *(T+273.15)*log((T+273.15)/ 336.64 )
GCA_002157505.faa_coaE.pdbA:Delta G(T) = -132.4 *(1-(T+273.15)/ 333.88 )+ 1.21 *( 60.7 -T)+ 1.21 *(T+273.15)*log((T+273.15)/ 333.88 )
GCA_002157565.faa_coaE.pdbA:Delta G(T) = -189.9 *(1-(T+273.15)/ 335.45 )+ 2.87 *( 62.3 -T)+ 2.87 *(T+273.15)*log((T+273.15)/ 335.45 )
GCA_002224285.faa_coaE.pdbA:Delta G(T) = -134.6 *(1-(T+273.15)/ 334.73 )+ 1.41 *( 61.6 -T)+ 1.41 *(T+273.15)*log((T+273.15)/ 334.73 )
GCA_002849715.faa_coaE.pdbA:Delta G(T) = -125.5 *(1-(T+273.15)/ 327.15 )+ 0.22 *( 54 -T)+ 0.22 *(T+273.15)*log((T+273.15)/ 327.15 )
GCA_002892795.faa_coaE.pdbA:Delta G(T) = -125.8 *(1-(T+273.15)/ 337.65 )+ 1.53 *( 64.5 -T)+ 1.53 *(T+273.15)*log((T+273.15)/ 337.65 )
GCA_002892835.faa_coaE.pdbA:Delta G(T) = -116 *(1-(T+273.15)/ 334.84 )+ 0.65 *( 61.7 -T)+ 0.65 *(T+273.15)*log((T+273.15)/ 334.84 )
GCA_002909415.faa_coaE.pdbA:Delta G(T) = -74.5 *(1-(T+273.15)/ 337.53 )+ 2.16 *( 64.4 -T)+ 2.16 *(T+273.15)*log((T+273.15)/ 337.53 )
GCA_002929215.faa_coaE.pdbA:Delta G(T) = -135.8 *(1-(T+273.15)/ 329.86 )+ 4.51 *( 56.7 -T)+ 4.51 *(T+273.15)*log((T+273.15)/ 329.86 )
GCA_002929255.faa_coaE.pdbA:Delta G(T) = -99.6 *(1-(T+273.15)/ 334.4 )+ 3.05 *( 61.2 -T)+ 3.05 *(T+273.15)*log((T+273.15)/ 334.4 )
GCA_002929275.faa_coaE.pdbA:Delta G(T) = -99.6 *(1-(T+273.15)/ 334.4 )+ 3.05 *( 61.2 -T)+ 3.05 *(T+273.15)*log((T+273.15)/ 334.4 )
GCA_002929295.faa_coaE.pdbA:Delta G(T) = -113.7 *(1-(T+273.15)/ 335.68 )+ 0.99 *( 62.5 -T)+ 0.99 *(T+273.15)*log((T+273.15)/ 335.68 )
GCA_002929305.faa_coaE.pdbA:Delta G(T) = -129.8 *(1-(T+273.15)/ 339.16 )+ 1.25 *( 66 -T)+ 1.25 *(T+273.15)*log((T+273.15)/ 339.16 )
GCA_002929335.faa_coaE.pdbA:Delta G(T) = -134.2 *(1-(T+273.15)/ 336.84 )+ 1.67 *( 63.7 -T)+ 1.67 *(T+273.15)*log((T+273.15)/ 336.84 )
GCA_002929355.faa_coaE.pdbA:Delta G(T) = -134.1 *(1-(T+273.15)/ 332.94 )+ 0.67 *( 59.8 -T)+ 0.67 *(T+273.15)*log((T+273.15)/ 332.94 )
GCA_002929375.faa_coaE.pdbA:Delta G(T) = -156.9 *(1-(T+273.15)/ 329.4 )+ 1.59 *( 56.3 -T)+ 1.59 *(T+273.15)*log((T+273.15)/ 329.4 )
GCA_002929385.faa_coaE.pdbA:Delta G(T) = -103.7 *(1-(T+273.15)/ 333.72 )+ 0.66 *( 60.6 -T)+ 0.66 *(T+273.15)*log((T+273.15)/ 333.72 )
GCA_002929455.faa_coaE.pdbA:Delta G(T) = -104.1 *(1-(T+273.15)/ 333.33 )+ 0.71 *( 60.2 -T)+ 0.71 *(T+273.15)*log((T+273.15)/ 333.33 )
GCA_002929705.faa_coaE.pdbA:Delta G(T) = -114.2 *(1-(T+273.15)/ 334.98 )+ 0.93 *( 61.8 -T)+ 0.93 *(T+273.15)*log((T+273.15)/ 334.98 )
GCA_002929745.faa_coaE.pdbA:Delta G(T) = -106.2 *(1-(T+273.15)/ 332.97 )+ 0.26 *( 59.8 -T)+ 0.26 *(T+273.15)*log((T+273.15)/ 332.97 )
GCA_002929755.faa_coaE.pdbA:Delta G(T) = -145.8 *(1-(T+273.15)/ 337.96 )+ 2.4 *( 64.8 -T)+ 2.4 *(T+273.15)*log((T+273.15)/ 337.96 )
GCA_002934405.faa_coaE.pdbA:Delta G(T) = -113.6 *(1-(T+273.15)/ 333.14 )+ 3.55 *( 60 -T)+ 3.55 *(T+273.15)*log((T+273.15)/ 333.14 )
GCA_002953935.faa_coaE.pdbA:Delta G(T) = -157.1 *(1-(T+273.15)/ 334.87 )+ 1.75 *( 61.7 -T)+ 1.75 *(T+273.15)*log((T+273.15)/ 334.87 )
GCA_002954225.faa_coaE.pdbA:Delta G(T) = -130.2 *(1-(T+273.15)/ 336.55 )+ 0.73 *( 63.4 -T)+ 0.73 *(T+273.15)*log((T+273.15)/ 336.55 )
GCA_003097355.faa_coaE.pdbA:Delta G(T) = -120.6 *(1-(T+273.15)/ 332.27 )+ 0.64 *( 59.1 -T)+ 0.64 *(T+273.15)*log((T+273.15)/ 332.27 )
GCA_003116525.faa_coaE.pdbA:Delta G(T) = -141.9 *(1-(T+273.15)/ 333.81 )+ 2.23 *( 60.7 -T)+ 2.23 *(T+273.15)*log((T+273.15)/ 333.81 )
GCA_003185915.faa_coaE.pdbA:Delta G(T) = -121.3 *(1-(T+273.15)/ 334.52 )+ 1.14 *( 61.4 -T)+ 1.14 *(T+273.15)*log((T+273.15)/ 334.52 )
GCA_003208335.faa_coaE.pdbA:Delta G(T) = -133.6 *(1-(T+273.15)/ 336.39 )+ 1.45 *( 63.2 -T)+ 1.45 *(T+273.15)*log((T+273.15)/ 336.39 )
GCA_003219795.faa_coaE.pdbA:Delta G(T) = -95.5 *(1-(T+273.15)/ 338.38 )+ 1.03 *( 65.2 -T)+ 1.03 *(T+273.15)*log((T+273.15)/ 338.38 )
GCA_003219815.faa_coaE.pdbA:Delta G(T) = -148.1 *(1-(T+273.15)/ 337.91 )+ 1.67 *( 64.8 -T)+ 1.67 *(T+273.15)*log((T+273.15)/ 337.91 )
GCA_003268655.faa_coaE.pdbA:Delta G(T) = -168.9 *(1-(T+273.15)/ 334.2 )+ 2.11 *( 61.1 -T)+ 2.11 *(T+273.15)*log((T+273.15)/ 334.2 )
GCA_003287955.faa_coaE.pdbA:Delta G(T) = -129 *(1-(T+273.15)/ 336.96 )+ 1.78 *( 63.8 -T)+ 1.78 *(T+273.15)*log((T+273.15)/ 336.96 )
GCA_900016675.faa_coaE.pdbA:Delta G(T) = -104.3 *(1-(T+273.15)/ 334.22 )+ 1.02 *( 61.1 -T)+ 1.02 *(T+273.15)*log((T+273.15)/ 334.22 )
GCA_900099735.faa_coaE.pdbA:Delta G(T) = -143.2 *(1-(T+273.15)/ 337.23 )+ 2.53 *( 64.1 -T)+ 2.53 *(T+273.15)*log((T+273.15)/ 337.23 )
GCA_900099975.faa_coaE.pdbA:Delta G(T) = -141.4 *(1-(T+273.15)/ 331.81 )+ 1.07 *( 58.7 -T)+ 1.07 *(T+273.15)*log((T+273.15)/ 331.81 )
GCA_900102785.faa_coaE.pdbA:Delta G(T) = -147 *(1-(T+273.15)/ 331.56 )+ 1.5 *( 58.4 -T)+ 1.5 *(T+273.15)*log((T+273.15)/ 331.56 )
GCA_900102805.faa_coaE.pdbA:Delta G(T) = -142.7 *(1-(T+273.15)/ 334.34 )+ 2.52 *( 61.2 -T)+ 2.52 *(T+273.15)*log((T+273.15)/ 334.34 )
GCA_900102895.faa_coaE.pdbA:Delta G(T) = -147.2 *(1-(T+273.15)/ 331.4 )+ 1.43 *( 58.2 -T)+ 1.43 *(T+273.15)*log((T+273.15)/ 331.4 )
GCA_900104405.faa_coaE.pdbA:Delta G(T) = -127.4 *(1-(T+273.15)/ 335.48 )+ 1.3 *( 62.3 -T)+ 1.3 *(T+273.15)*log((T+273.15)/ 335.48 )
GCA_900105345.faa_coaE.pdbA:Delta G(T) = -102.5 *(1-(T+273.15)/ 336.28 )+ 0.57 *( 63.1 -T)+ 0.57 *(T+273.15)*log((T+273.15)/ 336.28 )
GCA_900105535.faa_coaE.pdbA:Delta G(T) = -139 *(1-(T+273.15)/ 333.68 )+ 1.2 *( 60.5 -T)+ 1.2 *(T+273.15)*log((T+273.15)/ 333.68 )
GCA_900105965.faa_coaE.pdbA:Delta G(T) = -103.6 *(1-(T+273.15)/ 338.1 )+ 1.2 *( 64.9 -T)+ 1.2 *(T+273.15)*log((T+273.15)/ 338.1 )
GCA_900106835.faa_coaE.pdbA:Delta G(T) = -122.5 *(1-(T+273.15)/ 334.26 )+ 1.53 *( 61.1 -T)+ 1.53 *(T+273.15)*log((T+273.15)/ 334.26 )
GCA_900110595.faa_coaE.pdbA:Delta G(T) = -140.3 *(1-(T+273.15)/ 333.58 )+ 0.32 *( 60.4 -T)+ 0.32 *(T+273.15)*log((T+273.15)/ 333.58 )
GCA_900116495.faa_coaE.pdbA:Delta G(T) = -132.1 *(1-(T+273.15)/ 333.97 )+ 1.61 *( 60.8 -T)+ 1.61 *(T+273.15)*log((T+273.15)/ 333.97 )
GCA_900168135.faa_coaE.pdbA:Delta G(T) = -135.2 *(1-(T+273.15)/ 331.26 )+ 1.32 *( 58.1 -T)+ 1.32 *(T+273.15)*log((T+273.15)/ 331.26 )
GCA_900168225.faa_coaE.pdbA:Delta G(T) = -119.3 *(1-(T+273.15)/ 337.65 )+ 1.46 *( 64.5 -T)+ 1.46 *(T+273.15)*log((T+273.15)/ 337.65 )
GCA_000014925.cspC:Delta G(T) = -52.4 *(1-(T+273.15)/ 336.15 )+ 1.18 *( 63 -T)+ 1.18 *(T+273.15)*log((T+273.15)/ 336.15 )
GCA_000022025.cspC:Delta G(T) = -48.2 *(1-(T+273.15)/ 323.42 )+ 1.41 *( 50.3 -T)+ 1.41 *(T+273.15)*log((T+273.15)/ 323.42 )
GCA_000189535.cspC:Delta G(T) = -45.9 *(1-(T+273.15)/ 334.95 )+ 1.39 *( 61.8 -T)+ 1.39 *(T+273.15)*log((T+273.15)/ 334.95 )
GCA_000196235.cspC:Delta G(T) = -47.7 *(1-(T+273.15)/ 322.86 )+ 1.32 *( 49.7 -T)+ 1.32 *(T+273.15)*log((T+273.15)/ 322.86 )
GCA_000238915.cspC:Delta G(T) = -44.6 *(1-(T+273.15)/ 332.06 )+ 1.42 *( 58.9 -T)+ 1.42 *(T+273.15)*log((T+273.15)/ 332.06 )
GCA_000281065.cspC:Delta G(T) = -63.6 *(1-(T+273.15)/ 325.87 )+ 1.37 *( 52.7 -T)+ 1.37 *(T+273.15)*log((T+273.15)/ 325.87 )
GCA_000294595.cspC:Delta G(T) = -66.7 *(1-(T+273.15)/ 344.7 )+ 1.73 *( 71.6 -T)+ 1.73 *(T+273.15)*log((T+273.15)/ 344.7 )
GCA_000294695.cspC:Delta G(T) = -114 *(1-(T+273.15)/ 349.99 )+ 0.8 *( 76.8 -T)+ 0.8 *(T+273.15)*log((T+273.15)/ 349.99 )
GCA_000332815.cspC:Delta G(T) = -48.7 *(1-(T+273.15)/ 333.12 )+ 1.39 *( 60 -T)+ 1.39 *(T+273.15)*log((T+273.15)/ 333.12 )
GCA_000374865.cspC:Delta G(T) = -48.7 *(1-(T+273.15)/ 333.12 )+ 1.39 *( 60 -T)+ 1.39 *(T+273.15)*log((T+273.15)/ 333.12 )
GCA_000374905.cspC:Delta G(T) = -48.7 *(1-(T+273.15)/ 333.12 )+ 1.39 *( 60 -T)+ 1.39 *(T+273.15)*log((T+273.15)/ 333.12 )
GCA_000374925.cspC:Delta G(T) = -50.2 *(1-(T+273.15)/ 326.44 )+ 1.46 *( 53.3 -T)+ 1.46 *(T+273.15)*log((T+273.15)/ 326.44 )
GCA_000374945.cspC:Delta G(T) = -63.6 *(1-(T+273.15)/ 325.87 )+ 1.37 *( 52.7 -T)+ 1.37 *(T+273.15)*log((T+273.15)/ 325.87 )
GCA_000468215.cspC:Delta G(T) = -72.5 *(1-(T+273.15)/ 346.95 )+ 1.82 *( 73.8 -T)+ 1.82 *(T+273.15)*log((T+273.15)/ 346.95 )
GCA_000482545.cspC:Delta G(T) = -71.5 *(1-(T+273.15)/ 354.45 )+ 1.62 *( 81.3 -T)+ 1.62 *(T+273.15)*log((T+273.15)/ 354.45 )
GCA_000514015.cspC:Delta G(T) = -57.4 *(1-(T+273.15)/ 332.95 )+ 1.41 *( 59.8 -T)+ 1.41 *(T+273.15)*log((T+273.15)/ 332.95 )
GCA_000514155.cspC:Delta G(T) = -57.4 *(1-(T+273.15)/ 332.95 )+ 1.41 *( 59.8 -T)+ 1.41 *(T+273.15)*log((T+273.15)/ 332.95 )
[truncated: 15,339 more rows]
