# Supplementary material for: Linking Genomic and Physiological Characteristics of Psychrophilic Arthrobacter to Metagenomic Data to Explain Global Environmental Distribution
Source: Research Square preprint supplement (doi:10.21203/rs.3.rs-119482/v1), 2020-12-07
Supplement: Supplementary file 2 [file bd8f94d2fb1b09657107f3dd.xlsx]

## Sheet: gain copies by group C
Table S6 Gene copy number data
					P value	Average number duplicated	GCA_000755585	GCA_000785535	GCA_001294625	GCA_001445575	GCA_002909415	GCA_002929305	GCA_002929705	GCA_003185915	GCA_003219795	GCA_900105965	GCA_000014925	GCA_000022025	GCA_000189535	GCA_000196235	GCA_000238915	GCA_000281065	GCA_000294695	GCA_000332815	GCA_000374865	GCA_000374905	GCA_000374925	GCA_000374945	GCA_000482545	GCA_000514015	GCA_000514155	GCA_000517125	GCA_000620385	GCA_000685965	GCA_000813845	GCA_000876655	GCA_000962805	GCA_001046895	GCA_001187915	GCA_001238605	GCA_001307035	GCA_001373495	GCA_001422645	GCA_001422665	GCA_001423525	GCA_001423745	GCA_001424565	GCA_001428005	GCA_001428075
Category	Subcategory	Subsustem	Gene full name	Gene designation			Group C	Group C	Group C	Group C	Group C	Group C	Group C	Group C	Group C	Group C	Group A	Group A	Group A	Group A	Group A	Group A	Group A	Group A	Group A	Group A	Group A	Group A	Group A	Group A	Group A	Group A	Group A	Group A	Group A	Group A	Group A	Group A	Group A	Group A	Group A	Group A	Group A	Group A	Group A	Group A	Group A	Group A	Group A
Membrane Transport	ABC transporters	ABC transporter oligopeptide (TC 3.A.1.5.1)	Oligopeptide transport system permease protein OppB (TC 3.A.1.5.1)	oppB	0.000219413	4.71667	10	7	8	12	5	14	11	8	13	10	4	6	3	4	5	7	6	4	6	3	4	9	10	9	9	4	4	7	2	4	6	4	4	7	5	5	4	5	6	4	7	6	2
Sulfur Metabolism	Sulfur Metabolism - no subcategory	Galactosylceramide and Sulfatide metabolism	Beta-galactosidase (EC 3.2.1.23)	GLB1	0.00521502	3.80833	8	5	3	10	15	5	10	5	12	8	7	6	4	2	3	4	6	9	9	4	1	6	11	10	10	1	1	5	3	3	7	7	6	15	1	1	1	5	7	4	11	1	5
Membrane Transport	ABC transporters	ABC transporter oligopeptide (TC 3.A.1.5.1)	Oligopeptide ABC transporter, periplasmic oligopeptide-binding protein OppA (TC 3.A.1.5.1)	oppA	0.00149056	2.82708	8	5	4	7	4	11	9	7	6	8	4	4	5	4	3	5	4	4	5	4	3	4	6	6	6	4	3	4	3	4	5	6	4	4	2	2	3	4	5	3	4	5	3
Amino Acids and Derivatives	Lysine, threonine, methionine, and cysteine	Methionine Degradation	Methionine ABC transporter ATP-binding protein	metN	6.05122e-05	2.60625	7	7	5	4	5	8	6	7	5	8	4	2	2	4	1	2	3	1	2	2	4	4	3	3	3	4	4	4	2	3	2	1	4	4	9	9	5	3	2	6	2	3	1
Stress Response	Osmotic stress	Choline and Betaine Uptake and Betaine Biosynthesis	L-proline glycine betaine ABC transport system permease protein ProW (TC 3.A.1.12.1)	proW	5.63536e-57	1.82292	3	3	3	3	3	3	3	3	3	3	1	1	1	1	1	2	2	2	1	1	1	1	1	1	1	1	1	1	1	1	1	1	1	1	1	1	1	1	1	1	1	2	1
Fatty Acids, Lipids, and Isoprenoids	Fatty acids	Fatty acid metabolism cluster	Enoyl-CoA hydratase (EC 4.2.1.17)	ECHS	0.00531589	1.69375	7	7	11	8	8	7	8	9	5	6	6	5	5	6	6	6	8	7	7	5	5	6	8	6	6	11	7	5	5	6	5	8	3	3	4	4	8	3	4	8	4	10	4
Fatty Acids, Lipids, and Isoprenoids	Fatty acids	Fatty acid metabolism cluster	3-hydroxyacyl-CoA dehydrogenase (EC 1.1.1.35)	HSD	0.00253572	0.91875	4	5	5	5	4	3	5	3	4	4	3	2	3	3	4	3	3	2	3	3	3	4	3	3	3	4	4	3	3	3	2	4	2	3	2	2	4	2	2	3	2	4	4
Carbohydrates	Aminosugars	Chitin and N-acetylglucosamine utilization	N-acetylglucosamine kinase of eukaryotic type (EC 2.7.1.59)	NAGK	4.69836e-05	0.610417	2	2	2	2	2	3	2	2	2	2	3	1	1	1	2	3	3	1	1	1	1	3	3	3	2	3	1	1	1	1	1	1	0	1	1	1	1	1	1	1	1	2	1
Carbohydrates	Central carbohydrate metabolism	Pyruvate metabolism II: acetyl-CoA, acetogenesis from pyruvate	Pyruvate dehydrogenase E1 component alpha subunit (EC 1.2.4.1)	aceE	3.42987e-06	1.38125	2	3	3	2	3	3	2	3	2	3	1	1	1	1	1	1	1	1	1	1	1	1	2	1	1	1	1	1	1	1	1	1	2	1	1	2	1	1	1	1	1	1	1
Nucleosides and Nucleotides	Nucleosides and Nucleotides - no subcategory	Ribonucleotide reduction	Glutaredoxin-like protein NrdH, required for reduction of Ribonucleotide reductase class Ib	nrdH	0.0145018	1.37083	3	2	3	4	2	4	5	1	1	6	2	2	3	3	1	2	3	3	2	2	1	2	1	1	1	4	1	1	2	1	2	2	1	2	2	1	1	1	1	3	2	3	1
Regulation and Cell signaling	Regulation and Cell signaling - no subcategory	Cell envelope-associated LytR-CpsA-Psr transcriptional attenuators	Cell envelope-associated transcriptional attenuator LytR-CpsA-Psr, subfamily A1 (as in PMID19099556)		0.0422211	1.24583	1	3	3	3	1	6	3	7	3	1	2	2	3	2	2	1	1	1	2	2	3	2	1	2	2	3	3	2	2	2	3	1	2	2	1	1	3	2	1	2	2	2	2
Protein Metabolism	Protein degradation	Aminopeptidases (EC 3.4.11.-)	Cytosol aminopeptidase PepA (EC 3.4.11.1)	pepA	0.00301172	1.2125	5	2	2	2	2	3	2	1	2	3	1	1	1	1	1	1	1	1	1	1	1	1	1	2	2	1	1	2	1	1	1	1	1	1	2	2	1	1	1	1	1	1	1
Stress Response	Osmotic stress	Choline and Betaine Uptake and Betaine Biosynthesis	L-proline glycine betaine binding ABC transporter protein ProX (TC 3.A.1.12.1)	proX	1.56016e-31	0.760417	2	2	2	2	2	2	2	2	2	2	1	1	1	1	1	2	2	1	1	1	1	1	2	1	1	1	1	1	1	1	1	1	1	1	1	1	1	1	1	1	1	2	1
Stress Response	Osmotic stress	Choline and Betaine Uptake and Betaine Biosynthesis	L-proline glycine betaine ABC transport system permease protein ProV (TC 3.A.1.12.1)	proV	1.40318e-05	0.6625	2	2	2	3	2	2	2	2	2	2	2	1	1	1	1	2	3	2	1	1	1	1	2	1	1	1	1	1	1	1	1	1	1	1	1	1	1	1	1	1	1	2	1
Stress Response	Osmotic stress	Osmoregulation	Glycerol uptake facilitator protein	glpF	0.0199419	0.627083	1	2	3	2	1	1	3	2	1	1	1	1	1	1	1	1	1	0	1	1	1	1	1	1	1	2	1	1	1	1	1	1	1	1	1	1	1	1	1	1	1	2	2
Stress Response	Oxidative stress	Oxidative stress	Ferroxidase (EC 1.16.3.1)		0.00543186	1.0875	1	4	2	2	4	2	3	2	3	1	1	2	2	2	2	1	1	2	1	1	1	1	2	1	1	1	1	2	1	2	2	2	1	1	1	1	1	1	2	2	1	2	1
Amino Acids and Derivatives	Proline and 4-hydroxyproline	Proline, 4-hydroxyproline uptake and utilization	Proline iminopeptidase (EC 3.4.11.5)	pip	0.00316015	1.06042	2	3	4	2	1	3	3	1	2	2	1	1	1	1	2	1	2	3	1	1	1	1	1	2	1	1	1	2	1	2	1	1	1	1	1	1	1	1	1	1	1	1	1
Protein Metabolism	Protein processing and modification	Signal peptidase	Signal peptidase I (EC 3.4.21.89)	lepB	0.00239494	1	5	4	4	5	5	4	4	3	5	6	4	7	2	2	6	3	5	4	4	4	3	4	3	5	4	5	3	3	5	2	6	3	4	4	3	3	3	3	4	2	3	6	3
Carbohydrates	Fermentation	Acetyl-CoA fermentation to Butyrate	Electron transfer flavoprotein, beta subunit	ETFB	0.0219169	0.614583	2	3	3	2	1	2	2	3	1	1	1	1	1	1	1	1	1	1	1	1	2	1	2	1	1	5	2	1	1	1	1	2	1	1	1	1	2	1	1	1	1	1	1
Cell Wall and Capsule	Capsular and extracellular polysacchrides	Sialic Acid Metabolism	N-acetylglucosamine-6-phosphate deacetylase (EC 3.5.1.25)	nagA	0.00625437	0.952083	2	3	2	5	2	2	2	2	2	2	1	2	1	3	1	1	1	1	1	1	1	1	2	1	1	1	1	2	1	1	2	1	3	1	1	1	1	2	2	1	1	2	1
Fatty Acids, Lipids, and Isoprenoids	Fatty acids	Fatty acid metabolism cluster	3-hydroxybutyryl-CoA epimerase (EC 5.1.2.3)	fadB	1.67884e-32	0.791667	2	2	2	2	2	2	2	2	2	2	1	1	1	1	2	1	1	1	1	1	1	2	1	1	1	2	1	1	1	1	1	1	1	1	1	1	1	1	1	1	1	1	1
Fatty Acids, Lipids, and Isoprenoids	Isoprenoids	Isoprenoinds for Quinones	Dimethylallyltransferase (EC 2.5.1.1)	GGPS1	5.55429e-07	0.910417	3	3	3	3	3	3	3	3	2	3	2	2	2	2	2	2	2	3	2	3	2	2	2	2	2	1	2	2	3	2	2	2	2	2	3	2	2	2	2	2	2	2	2
Membrane Transport	Cation transporters	Magnesium transport	Mg/Co/Ni transporter MgtE	mgtE	0.00120578	0.875	2	3	2	2	1	1	2	2	3	2	1	1	1	1	1	1	1	1	1	1	1	1	1	1	1	2	1	1	1	1	1	1	2	1	2	2	1	1	1	1	1	1	1
Amino Acids and Derivatives	Lysine, threonine, methionine, and cysteine	Lysine Biosynthesis DAP Pathway, GJO scratch	Diaminopimelate decarboxylase (EC 4.1.1.20)	lysA	9.44994e-05	0.875	2	2	2	2	2	2	2	2	1	3	1	1	1	1	1	1	1	1	1	1	1	1	1	1	1	1	1	1	1	1	1	1	1	1	1	2	1	1	1	1	1	1	1
Carbohydrates	Fermentation	Acetyl-CoA fermentation to Butyrate	Electron transfer flavoprotein, alpha subunit	ETFA	0.0219169	0.614583	2	3	3	2	1	2	2	3	1	1	1	1	1	1	1	1	1	1	1	1	2	1	2	1	1	5	2	1	1	1	1	2	1	1	1	1	2	1	1	1	1	1	1
Protein Metabolism	Protein degradation	Aminopeptidases (EC 3.4.11.-)	Xaa-Pro aminopeptidase (EC 3.4.11.9)	XPNPEP	0.000517116	0.847917	1	2	2	2	2	2	2	1	2	3	1	1	1	1	1	1	2	2	1	1	1	1	2	1	1	1	1	1	1	1	1	1	1	1	1	1	1	1	1	1	1	1	1
Cofactors, Vitamins, Prosthetic Groups, Pigments	Folate and pterines	Folate biosynthesis cluster	GTP cyclohydrolase I (EC 3.5.4.16) type 1	GCH1	7.62108e-38	0.84375	2	2	2	2	2	2	2	2	2	2	1	1	1	1	1	1	1	1	1	1	1	1	2	1	1	1	1	2	1	1	1	1	1	2	1	1	1	1	1	1	2	1	1
Carbohydrates	Monosaccharides	Fructose utilization	Phosphoenolpyruvate-protein phosphotransferase of PTS system (EC 2.7.3.9)	ptsI	0.00065614	1.40625	3	1	4	2	3	1	3	2	3	3	1	1	1	1	1	1	1	1	1	1	1	1	2	1	1	2	1	1	1	1	1	1	1	1	1	1	1	1	1	1	1	1	1
Cofactors, Vitamins, Prosthetic Groups, Pigments	Quinone cofactors	Menaquinone and Phylloquinone Biosynthesis	O-succinylbenzoic acid--CoA ligase (EC 6.2.1.26)		0.00293002	0.797917	3	4	3	2	2	2	2	2	3	3	1	1	1	3	2	1	1	1	4	1	1	2	3	1	1	3	2	2	1	4	1	1	2	1	4	3	2	1	1	4	1	4	1
Fatty Acids, Lipids, and Isoprenoids	Phospholipids	Cardiolipin synthesis	Cardiolipin synthetase (EC 2.7.8.-)	CRLS	5.84275e-07	1.74583	3	3	4	3	4	3	3	3	2	3	2	1	1	1	1	1	2	2	1	1	2	1	2	2	2	1	2	1	1	1	1	1	2	1	1	1	2	1	1	1	1	1	1
DNA Metabolism	DNA repair	DNA repair, bacterial	Single-stranded DNA-binding protein		0.0494371	0.779167	3	3	2	3	2	5	2	1	2	5	2	3	4	3	1	2	3	2	2	1	1	2	1	1	1	3	1	2	1	2	1	1	2	2	3	1	1	3	1	2	3	4	1
Stress Response	Oxidative stress	Oxidative stress	Non-specific DNA-binding protein Dps	dps	0.00543186	1.0875	1	4	2	2	4	2	3	2	3	1	1	2	2	2	2	1	1	2	1	1	1	1	2	1	1	1	1	2	1	2	2	2	1	1	1	1	1	1	2	2	1	2	1
Cell Wall and Capsule	Capsular and extracellular polysacchrides	Sialic Acid Metabolism	Glucosamine-1-phosphate N-acetyltransferase (EC 2.3.1.157)		3.86482e-06	0.766667	2	2	3	2	2	2	2	2	2	2	2	1	1	1	2	2	2	1	1	1	1	2	1	2	2	1	1	1	1	1	1	1	2	1	2	1	3	1	1	1	1	2	1
Cell Wall and Capsule	Capsular and extracellular polysacchrides	Sialic Acid Metabolism	N-acetylglucosamine-1-phosphate uridyltransferase (EC 2.7.7.23)		3.86482e-06	0.766667	2	2	3	2	2	2	2	2	2	2	2	1	1	1	2	2	2	1	1	1	1	2	1	2	2	1	1	1	1	1	1	1	2	1	2	1	3	1	1	1	1	2	1
Stress Response	Oxidative stress	Oxidative stress	Iron-binding ferritin-like antioxidant protein		0.00543186	1.0875	1	4	2	2	4	2	3	2	3	1	1	2	2	2	2	1	1	2	1	1	1	1	2	1	1	1	1	2	1	2	2	2	1	1	1	1	1	1	2	2	1	2	1
Protein Metabolism	Protein biosynthesis	Translation termination factors bacterial	Protein-N(5)-glutamine methyltransferase PrmC, methylates polypeptide chain release factors RF1 and RF2	prmC	0.000120925	0.727083	4	4	3	4	4	4	4	4	3	4	3	3	2	4	3	3	3	3	4	4	3	3	4	3	3	3	3	4	3	4	3	3	1	4	3	3	4	3	4	3	4	4	3
RNA Metabolism	RNA processing and modification	Ribonucleases in Bacillus	Ribonuclease J2 (endoribonuclease in RNA processing)		3.25669e-28	0.71875	2	2	2	2	2	2	2	2	2	2	1	1	1	1	1	1	1	2	1	1	1	1	1	1	1	2	1	1	1	1	1	1	2	1	1	1	1	2	1	1	1	1	1
Stress Response	Oxidative stress	Oxidative stress	Alkyl hydroperoxide reductase subunit C-like protein		5.4457e-06	1.075	2	3	2	2	2	2	3	2	2	2	1	1	1	1	1	1	1	1	1	1	1	2	2	1	1	1	1	1	1	1	1	1	1	1	1	1	1	1	2	1	1	2	1
Nucleosides and Nucleotides	Purines	Purine conversions	Inosine-5@1-monophosphate dehydrogenase (EC 1.1.1.205)	IMPDH	1.67175e-05	0.6625	3	4	3	3	3	3	3	3	3	3	2	2	2	3	2	2	2	3	2	2	3	2	2	2	2	2	3	3	2	3	2	2	3	2	2	2	3	3	2	3	2	2	2
Stress Response	Oxidative stress	Oxidative stress	Transcriptional regulator, FUR family		5.94093e-06	0.775	2	2	2	2	2	1	2	2	2	2	1	1	1	1	1	1	1	1	1	1	1	1	1	1	1	1	1	1	1	1	1	1	1	1	1	1	1	1	1	1	1	1	1
Protein Metabolism	Protein biosynthesis	tRNA aminoacylation, Pro	Cys-tRNA(Pro) deacylase YbaK	ybaK	0.00210647	0.620833	3	3	3	2	2	3	2	2	3	3	2	2	2	2	1	3	2	2	1	1	4	2	2	2	2	1	4	2	1	2	2	2	2	2	3	2	2	2	2	3	2	2	1
Carbohydrates	Monosaccharides	D-gluconate and ketogluconates metabolism	Gluconokinase (EC 2.7.1.12)	gntK	0.0251026	0.85625	4	3	3	4	4	4	5	1	5	4	3	5	4	3	3	3	3	5	4	5	3	3	3	3	3	5	4	4	5	3	5	3	1	2	2	2	3	1	3	3	4	3	4
Carbohydrates	Monosaccharides	Fructose utilization	1-phosphofructokinase (EC 2.7.1.56)	pfkB	0.000157773	0.810417	2	2	3	3	2	2	2	3	2	2	4	1	2	3	2	4	3	1	1	1	1	1	1	1	1	2	1	2	1	2	1	1	1	1	1	1	2	1	1	2	1	2	1
Phosphorus Metabolism	Phosphorus Metabolism - no subcategory	Polyphosphate	Polyphosphate glucokinase (EC 2.7.1.63)	ppgK	0.0186761	0.6125	2	3	2	1	2	3	1	1	1	2	1	2	1	1	1	2	1	2	1	2	1	1	1	1	1	1	1	1	3	1	2	1	1	1	1	1	1	1	2	1	1	2	1
Carbohydrates	Sugar alcohols	Glycerol and Glycerol-3-phosphate Uptake and Utilization	Glycerophosphoryl diester phosphodiesterase (EC 3.1.4.46)	glpQ	0.00534	1	4	4	4	5	5	6	4	3	6	4	2	2	4	3	4	3	2	5	3	4	6	2	2	2	2	1	8	3	4	2	3	4	3	3	4	4	3	4	2	3	3	6	3
Amino Acids and Derivatives	Arginine; urea cycle, polyamines	Arginine Biosynthesis -- gjo	N-acetylglutamate synthase (EC 2.3.1.1)	NAGS	0.0113163	0.583333	3	3	3	2	3	2	3	3	4	4	2	2	2	2	2	2	2	4	2	2	3	2	3	2	2	3	3	2	2	2	2	2	2	2	3	2	3	3	2	2	2	3	2
Virulence, Disease and Defense	Resistance to antibiotics and toxic compounds	Mercuric reductase	PF00070 family, FAD-dependent NAD(P)-disulphide oxidoreductase		0.000910584	0.570833	2	2	1	2	2	2	2	1	2	2	1	2	1	1	1	1	1	1	1	1	1	1	2	1	1	2	1	3	1	1	1	1	2	1	1	1	1	1	1	1	1	1	1
Protein Metabolism	Protein biosynthesis	tRNAs	tRNA-Gly-GCC		0.0127473	0.539583	3	2	2	3	3	2	3	4	3	3	3	3	2	2	2	3	2	2	2	2	2	3	2	3	3	3	2	2	2	2	2	2	2	2	3	3	2	2	2	2	1	2	2
[truncated: 41 more columns]

## Sheet: lost copies by group C
					P value	Average number reducted	GCA_000755585	GCA_000785535	GCA_001294625	GCA_001445575	GCA_002909415	GCA_002929305	GCA_002929705	GCA_003185915	GCA_003219795	GCA_900105965	GCA_000014925	GCA_000022025	GCA_000189535	GCA_000196235	GCA_000238915	GCA_000281065	GCA_000294695	GCA_000332815	GCA_000374865	GCA_000374905	GCA_000374925	GCA_000374945	GCA_000482545	GCA_000514015	GCA_000514155	GCA_000517125	GCA_000620385	GCA_000685965	GCA_000813845	GCA_000876655	GCA_000962805	GCA_001046895	GCA_001187915	GCA_001238605	GCA_001307035	GCA_001373495	GCA_001422645	GCA_001422665	GCA_001423525	GCA_001423745	GCA_001424565	GCA_001428005	GCA_001428075
Category	Subcategory	Subsustem	Gene full name	Gene designation			Group C	Group C	Group C	Group C	Group C	Group C	Group C	Group C	Group C	Group C	Group A	Group A	Group A	Group A	Group A	Group A	Group A	Group A	Group A	Group A	Group A	Group A	Group A	Group A	Group A	Group A	Group A	Group A	Group A	Group A	Group A	Group A	Group A	Group A	Group A	Group A	Group A	Group A	Group A	Group A	Group A	Group A	Group A
Fatty Acids, Lipids, and Isoprenoids	Fatty acids	Fatty Acid Biosynthesis FASII	3-oxoacyl-[acyl-carrier protein] reductase (EC 1.1.1.100)	fabG	0.000213276	5.34375	7	17	12	11	8	12	9	11	6	7	17	13	12	15	20	16	24	14	22	17	13	24	17	19	19	30	13	20	22	14	12	20	6	5	9	10	11	10	9	22	6	28	14
Amino Acids and Derivatives	Proline and 4-hydroxyproline	Proline, 4-hydroxyproline uptake and utilization	L-Proline/Glycine betaine transporter ProP	proP	3.01693e-09	4.86667	3	4	6	3	2	2	3	2	1	2	14	11	7	8	21	13	11	11	6	6	7	11	6	12	10	6	8	11	6	11	11	10	1	5	7	5	8	1	10	12	7	18	7
Metabolism of Aromatic Compounds	Metabolism of central aromatic intermediates	Salicylate and gentisate catabolism	Fumarylacetoacetate hydrolase family protein	ycgM	1.14711e-08	2.20625	3	3	2	2	2	4	3	2	3	3	3	7	7	5	9	3	4	4	7	7	6	6	3	5	5	8	5	8	6	8	5	5	1	6	1	2	5	1	6	11	6	9	6
Cofactors, Vitamins, Prosthetic Groups, Pigments	Folate and pterines	5-FCL-like protein	Alcohol dehydrogenase (EC 1.1.1.1)	ADH	0.000891453	2.14167	5	6	5	7	3	3	5	3	2	5	8	7	10	7	5	7	8	11	9	6	8	6	4	7	7	11	6	5	6	8	4	5	7	3	8	7	5	6	4	10	3	12	6
Stress Response	Cold shock	Cold shock, CspA family of proteins	Cold shock protein CspA	cspA	1.32391e-09	2.00417	2	1	1	2	2	1	2	2	1	2	4	5	4	4	4	4	4	4	4	4	4	3	3	3	3	5	4	4	4	4	4	4	1	4	4	4	4	1	4	5	4	7	4
Amino Acids and Derivatives	Lysine, threonine, methionine, and cysteine	Threonine degradation	Threonine dehydrogenase and related Zn-dependent dehydrogenases	CC1_08390	0.000350225	1.91458	4	3	3	7	3	4	3	3	3	4	6	5	6	7	5	6	8	5	6	7	4	4	3	7	6	4	4	8	9	6	5	5	5	5	6	4	6	8	7	6	4	5	7
Protein Metabolism	Protein biosynthesis	tRNA aminoacylation, Asp and Asn	Aspartyl-tRNA(Asn) amidotransferase subunit A (EC 6.3.5.6)	gatA	6.99211e-13	1.65	1	1	1	1	2	1	1	1	1	1	4	3	4	2	4	3	3	2	2	2	3	3	2	3	3	2	3	2	2	3	2	3	4	3	2	3	2	5	2	2	2	4	2
Protein Metabolism	Protein biosynthesis	tRNA aminoacylation, Glu and Gln	Glutamyl-tRNA(Gln) amidotransferase subunit A (EC 6.3.5.7)	gatA	6.99211e-13	1.65	1	1	1	1	2	1	1	1	1	1	4	3	4	2	4	3	3	2	2	2	3	3	2	3	3	2	3	2	2	3	2	3	4	3	2	3	2	5	2	2	2	4	2
Amino Acids and Derivatives	Glutamine, glutamate, aspartate, asparagine; ammonia assimilation	Glutamine, Glutamate, Aspartate and Asparagine Biosynthesis	Aspartate aminotransferase (EC 2.6.1.1)	Got2	0.00101734	1.57917	7	7	5	8	7	6	8	6	5	5	9	10	8	10	13	9	9	11	8	8	6	8	8	9	9	7	7	9	9	12	11	9	5	8	8	6	7	5	9	10	10	11	7
Nitrogen Metabolism	Nitrogen Metabolism - no subcategory	Ammonia assimilation	Ammonium transporter	amt	1.79384e-30	1.53125	1	1	1	1	1	1	1	1	1	1	2	3	3	3	4	2	2	4	3	3	3	2	2	2	2	3	3	4	3	3	3	3	1	3	3	3	1	3	3	4	3	3	3
Cofactors, Vitamins, Prosthetic Groups, Pigments	Pyridoxine	Pyridoxin (Vitamin B6) Biosynthesis	D-3-phosphoglycerate dehydrogenase (EC 1.1.1.95)	serA	0.0135338	1.42917	5	9	3	6	4	6	5	6	5	4	7	10	4	6	10	10	11	8	8	6	6	6	12	8	8	7	6	9	4	7	9	6	5	6	5	3	3	5	10	9	8	13	6
Fatty Acids, Lipids, and Isoprenoids	Fatty acids	Fatty Acid Biosynthesis FASII	Biotin carboxylase of acetyl-CoA carboxylase (EC 6.3.4.14)	accC	5.64184e-05	0.979167	2	1	1	1	2	1	2	2	1	2	3	3	2	3	3	2	2	3	3	3	4	3	3	2	2	2	4	3	3	3	3	2	2	2	1	2	5	1	3	4	2	4	3
Metabolism of Aromatic Compounds	Peripheral pathways for catabolism of aromatic compounds	Salicylate ester degradation	Salicylate hydroxylase (EC 1.14.13.1)	nahG	0.00500706	1.26875	3	4	3	2	3	3	1	1	0	2	3	4	3	3	5	2	3	3	4	3	4	5	3	4	4	6	4	5	3	4	4	4	2	3	4	2	5	2	4	3	3	5	3
Fatty Acids, Lipids, and Isoprenoids	Fatty acids	Fatty Acid Biosynthesis FASII	Biotin carboxyl carrier protein of acetyl-CoA carboxylase	accB	0.000136479	0.895833	2	1	1	1	2	1	2	2	1	2	3	3	2	3	3	2	2	3	2	3	5	3	3	2	2	2	5	3	3	3	3	2	2	2	1	2	6	1	3	3	2	3	3
Nucleosides and Nucleotides	Pyrimidines	pyrimidine conversions	Thioredoxin reductase (EC 1.8.1.9)	TXNRD	0.00814159	1.17917	2	4	5	4	4	3	4	1	2	4	6	5	6	4	4	5	5	7	3	3	6	5	5	4	4	3	5	4	3	3	4	8	3	4	3	3	5	4	5	4	4	4	5
Fatty Acids, Lipids, and Isoprenoids	Fatty acids	Fatty Acid Biosynthesis FASII	Acetyl-coenzyme A carboxyl transferase alpha chain (EC 6.4.1.2)	HFA1	1.11878e-22	0.739583	1	1	1	1	1	1	1	1	1	1	1	2	2	2	2	2	1	1	2	2	2	2	1	1	1	1	2	2	2	2	2	2	2	2	1	1	1	2	2	2	2	2	2
Nitrogen Metabolism	Nitrogen Metabolism - no subcategory	Nitrate and nitrite ammonification	Nitrate/nitrite transporter	narU	6.93233e-05	1.16458	1	1	1	2	2	0	2	1	1	1	1	1	3	3	5	1	2	2	3	5	6	1	2	1	1	1	4	5	4	5	1	1	1	1	2	1	4	1	1	5	1	4	4
Carbohydrates	Aminosugars	Chitin and N-acetylglucosamine utilization	Predicted transcriptional regulator of N-Acetylglucosamine utilization, GntR family	gntR	1.63857e-15	0.729167	1	1	1	1	1	1	1	1	1	1	2	1	2	2	2	2	2	2	2	2	1	2	2	2	2	3	1	2	2	1	1	2	0	2	2	2	1	1	1	2	2	3	2
Phosphorus Metabolism	Phosphorus Metabolism - no subcategory	High affinity phosphate transporter and control of PHO regulon	Phosphate regulon transcriptional regulatory protein PhoB (SphR)	phoB	0.00312937	1.04375	1	1	1	3	1	2	2	3	3	1	2	3	3	8	3	2	2	5	3	2	3	2	1	2	2	3	2	4	2	4	3	4	4	3	2	1	2	6	3	7	2	3	3
Regulation and Cell signaling	Regulation and Cell signaling - no subcategory	LysR-family proteins in Escherichia coli	Chromosome initiation inhibitor		0.000642008	1.00417	1	2	2	1	2	3	1	1	2	1	3	4	3	2	5	3	3	4	4	5	5	3	2	3	3	4	3	3	4	2	4	2	1	6	0	1	3	2	4	2	6	3	4
DNA Metabolism	DNA repair	DNA Repair Base Excision	Formamidopyrimidine-DNA glycosylase (EC 3.2.2.23)	FPG1	2.61564e-54	0.979167	3	3	3	3	3	3	3	3	3	3	4	4	4	4	4	4	4	4	4	4	4	4	3	4	4	4	4	4	4	4	4	4	4	4	4	4	4	4	4	4	4	4	4
Fatty Acids, Lipids, and Isoprenoids	Fatty acids	Fatty Acid Biosynthesis FASII	Acetyl-coenzyme A carboxyl transferase beta chain (EC 6.4.1.2)	HFA1	1.11878e-22	0.739583	1	1	1	1	1	1	1	1	1	1	1	2	2	2	2	2	1	1	2	2	2	2	1	1	1	1	2	2	2	2	2	2	2	2	1	1	1	2	2	2	2	2	2
Carbohydrates	Central carbohydrate metabolism	Glycolate, glyoxylate interconversions	Glycolate dehydrogenase (EC 1.1.99.14), subunit GlcD	glcD	1.43814e-09	1.14167	1	1	1	0	1	1	1	1	1	1	1	4	2	2	2	2	2	1	1	2	1	2	1	2	1	1	1	1	1	2	2	1	1	2	4	2	1	1	2	1	2	3	2
RNA Metabolism	RNA processing and modification	Queuosine-Archaeosine Biosynthesis	Inosine-uridine preferring nucleoside hydrolase (EC 3.2.2.1)	rihC	9.46101e-08	0.952083	1	2	1	1	1	1	1	1	1	1	2	2	2	3	2	2	3	2	2	2	1	2	4	2	2	2	1	1	3	1	3	3	1	4	1	1	1	1	3	2	4	2	3
Stress Response	Oxidative stress	Oxidative stress	Catalase (EC 1.11.1.6)	CAT	0.00458103	0.9	1	3	2	3	1	1	1	1	2	1	2	3	3	2	3	2	2	6	2	2	1	2	1	2	2	1	1	0	3	2	3	2	3	2	4	3	1	3	3	1	3	2	3
Fatty Acids, Lipids, and Isoprenoids	Phospholipids	Glycerolipid and Glycerophospholipid Metabolism in Bacteria	Aldehyde dehydrogenase (EC 1.2.1.3)	ALDH	0.0363987	1.2875	6	4	10	6	4	5	4	6	4	5	14	4	6	10	9	7	7	11	11	6	6	7	7	6	6	8	5	7	10	7	4	8	4	3	5	6	6	2	3	8	3	13	6
RNA Metabolism	RNA processing and modification	tRNA processing	tRNA-specific adenosine-34 deaminase (EC 3.5.4.-)	ADAT2	1.13158e-17	0.875	1	1	1	1	1	1	1	1	1	1	2	3	3	2	3	2	2	3	3	3	1	2	2	2	2	2	1	2	3	2	3	3	1	3	1	2	2	1	3	2	3	3	3
Miscellaneous	Plant-Prokaryote DOE project	Iron-sulfur cluster assembly	Ferredoxin, 2Fe-2S	fdx	1.62506e-05	0.872917	1	1	2	2	1	1	1	1	1	1	1	3	3	3	3	1	1	2	2	2	2	1	1	2	1	2	2	4	3	4	3	2	2	2	1	1	2	2	2	2	2	3	3
Membrane Transport	Cation transporters	Magnesium transport	Magnesium and cobalt efflux protein CorC	corC	1.88626e-05	0.8625	2	2	2	2	2	2	3	2	3	2	5	3	4	4	3	3	4	4	4	3	2	2	2	2	2	2	2	3	3	4	3	4	3	3	4	4	2	3	3	3	3	2	3
DNA Metabolism	DNA repair	DNA Repair Base Excision	DNA polymerase I (EC 2.7.7.7)		4.98865e-29	0.854167	2	2	2	2	2	2	2	2	2	2	3	3	3	3	3	3	3	3	3	3	3	3	2	3	3	3	3	3	3	3	3	5	2	3	3	3	3	3	3	3	3	3	3
Cofactors, Vitamins, Prosthetic Groups, Pigments	Coenzyme A	Coenzyme A Biosynthesis	Pantothenate kinase (EC 2.7.1.33)	PANK	1.68884e-24	0.84375	1	1	1	1	1	1	1	1	1	1	1	2	2	2	2	1	1	3	2	2	2	1	2	1	1	1	2	2	2	2	2	2	3	2	1	2	1	2	2	3	2	3	2
Carbohydrates	Central carbohydrate metabolism	Pentose phosphate pathway	Ribose 5-phosphate isomerase B (EC 5.3.1.6)	rpiB	0.0287971	0.604167	3	3	1	2	2	1	2	1	2	3	3	2	2	3	7	2	4	2	5	3	4	3	3	3	3	4	5	4	3	3	2	2	1	1	1	1	2	1	1	5	1	4	3
Cell Wall and Capsule	Capsular and extracellular polysacchrides	Rhamnose containing glycans	UDP-glucose 4-epimerase (EC 5.1.3.2)	galE	0.0181288	0.835417	5	4	4	3	3	5	5	4	2	3	6	5	6	4	5	6	6	2	5	6	4	5	7	7	7	4	3	5	5	4	6	5	4	6	3	3	3	4	4	5	6	6	6
Carbohydrates	Di- and oligosaccharides	Trehalose Biosynthesis	Glucoamylase (EC 3.2.1.3)	GLAA	1.518e-07	0.9625	1	1	1	1	1	1	1	1	2	1	1	2	1	2	4	1	1	2	1	2	3	1	2	2	1	3	3	1	1	1	1	2	2	2	1	1	1	2	1	1	2	6	3
DNA Metabolism	DNA repair	DNA repair, bacterial RecFOR pathway	ATP-dependent DNA helicase RecQ	recQ	1.87129e-25	0.802083	1	1	1	1	1	1	1	1	1	1	2	2	2	2	2	2	2	2	2	2	1	2	1	3	2	1	1	2	2	2	2	2	2	1	2	2	1	2	2	2	2	2	3
Cofactors, Vitamins, Prosthetic Groups, Pigments	Folate and pterines	5-FCL-like protein	Formyltetrahydrofolate deformylase (EC 3.5.1.10)	purU	0.00511028	0.775	2	3	3	3	2	1	2	2	1	2	3	3	3	3	5	4	3	3	3	3	3	3	1	3	3	2	2	4	3	4	3	4	1	3	1	1	3	2	3	4	3	6	3
Fatty Acids, Lipids, and Isoprenoids	Phospholipids	Glycerolipid and Glycerophospholipid Metabolism in Bacteria	Glycerate kinase (EC 2.7.1.31)	glxK	1.44878e-06	1.2	2	1	1	1	2	1	1	2	1	1	3	4	3	2	5	2	3	3	2	2	3	2	2	2	2	2	3	3	2	2	2	2	3	3	1	1	3	2	3	7	3	4	3
Fatty Acids, Lipids, and Isoprenoids	Phospholipids	Glycerolipid and Glycerophospholipid Metabolism in Bacteria	Aldehyde dehydrogenase B (EC 1.2.1.22)	aldB	2.15466e-06	1.17917	2	1	1	2	2	1	1	1	1	1	5	3	1	3	5	4	4	5	2	2	2	2	4	3	2	2	3	4	3	1	3	2	3	1	2	1	2	1	1	3	1	4	2
Potassium metabolism	Potassium metabolism - no subcategory	Potassium homeostasis	Osmosensitive K+ channel histidine kinase KdpD (EC 2.7.3.-)	kdpD	0.00272349	0.7375	4	3	3	3	3	4	4	3	2	3	4	5	4	6	5	5	4	4	5	4	4	5	4	5	5	6	4	4	5	5	4	4	3	4	2	3	4	5	4	4	4	5	4
Carbohydrates	Di- and oligosaccharides	Trehalose Biosynthesis	Trehalose-6-phosphate phosphatase (EC 3.1.3.12)	otsB	0.000205211	0.839583	1	1	2	2	1	1	2	2	1	1	2	4	3	3	2	2	2	4	3	3	3	2	2	2	2	3	3	3	2	3	2	3	2	2	1	1	3	3	3	3	2	3	2
Nucleosides and Nucleotides	Purines	Purine Utilization	Xanthine/uracil/thiamine/ascorbate permease family protein		5.30007e-25	0.729167	1	1	1	1	1	1	1	1	1	1	3	2	2	2	2	2	2	2	2	2	1	2	2	2	2	2	1	2	2	2	2	2	1	2	1	1	2	1	2	2	2	2	2
Protein Metabolism	Protein folding	GroEL GroES	Chaperone protein DnaK	dnaK	2.19334e-16	0.697917	1	1	1	1	1	1	1	1	1	1	3	3	3	1	2	3	3	2	2	2	1	3	1	2	2	1	2	1	2	2	2	4	2	1	1	1	1	1	2	1	1	1	2
Respiration	Respiration - no subcategory	Formate hydrogenase	Putative formate dehydrogenase oxidoreductase protein		0.000207459	0.685417	1	1	2	1	1	2	1	1	1	1	3	2	2	2	3	3	3	5	2	2	2	3	1	2	2	2	1	3	1	1	2	2	2	2	1	1	1	2	2	2	2	2	1
Metabolism of Aromatic Compounds	Metabolism of central aromatic intermediates	Central meta-cleavage pathway of aromatic compound degradation	Catechol 2,3-dioxygenase (EC 1.13.11.2)	catE	1.17464e-05	0.672917	1	1	1	1	1	1	1	1	0	1	3	2	3	1	3	1	3	2	1	1	1	1	1	2	2	4	1	2	2	2	2	3	1	2	1	1	2	1	2	2	3	1	1
Metabolism of Aromatic Compounds	Metabolism of central aromatic intermediates	Catechol branch of beta-ketoadipate pathway	Succinyl-CoA:3-ketoacid-coenzyme A transferase subunit A (EC 2.8.3.5)	OXCT1	1.33214e-05	0.670833	1	2	1	1	1	1	1	1	1	1	2	2	2	2	2	2	2	3	2	2	2	2	1	2	2	2	2	2	2	2	2	2	1	2	1	2	2	1	2	2	2	4	2
Carbohydrates	Di- and oligosaccharides	Maltose and Maltodextrin Utilization	Maltose/maltodextrin ABC transporter, permease protein MalF	malF	0.00734963	0.8125	3	3	1	2	2	1	2	1	2	3	3	4	6	5	2	3	3	3	3	4	3	6	6	1	1	2	4	4	4	5	5	3	4	0	3	2	3	4	4	5	0	4	3
Nucleosides and Nucleotides	Pyrimidines	De Novo Pyrimidine Synthesis	Dihydroorotase (EC 3.5.2.3)	pyrC	3.33812e-12	0.645833	1	1	1	1	1	1	1	1	1	1	1	1	1	3	2	2	1	2	2	2	1	2	4	2	2	1	1	3	2	2	1	1	1	1	1	1	2	1	1	2	1	3	2
Amino Acids and Derivatives	Lysine, threonine, methionine, and cysteine	Lysine Biosynthesis DAP Pathway, GJO scratch	4-hydroxy-tetrahydrodipicolinate synthase (EC 4.3.3.7)	dapA	0.00167252	0.616667	2	2	2	2	3	2	3	3	2	2	4	5	5	3	4	4	4	2	3	2	3	3	3	3	3	4	3	4	2	1	4	3	2	3	3	3	3	3	3	2	3	4	1
Amino Acids and Derivatives	Aromatic amino acids and derivatives	Chorismate Synthesis	Prephenate dehydratase (EC 4.2.1.51)		1.11058e-21	0.614583	1	1	1	1	1	1	1	1	1	1	2	2	2	2	2	2	2	2	2	2	2	2	1	2	2	2	2	2	2	2	2	2	1	2	1	1	1	1	2	2	2	1	2
Cofactors, Vitamins, Prosthetic Groups, Pigments	Folate and pterines	5-FCL-like protein	Pyruvate dehydrogenase E1 component (EC 1.2.4.1)	PDA1	0.0131977	0.610417	2	1	1	1	3	1	1	1	1	2	5	2	3	2	3	2	5	2	2	2	1	2	3	2	2	2	1	2	2	2	2	2	1	2	2	2	3	1	5	3	2	4	5
Carbohydrates	Monosaccharides	Deoxyribose and Deoxynucleoside Catabolism	Ribokinase (EC 2.7.1.15)	rbsK	0.0107554	0.666667	2	2	3	1	1	1	2	1	1	1	2	1	2	3	1	4	2	5	3	5	0	2	6	2	2	2	1	1	3	2	2	3	1	2	2	2	1	2	2	4	2	2	4
Cell Wall and Capsule	Capsular and extracellular polysacchrides	Lipid-linked oligosaccharide synthesis related cluster	Exoenzymes regulatory protein AepA in lipid-linked oligosaccharide synthesis cluster	aepA	0.000743137	0.591667	1	1	1	1	1	1	1	2	1	2	2	2	2	3	2	1	1	1	2	2	3	1	2	1	1	1	3	2	1	2	2	2	2	1	2	1	3	1	2	3	1	3	1
Cell Wall and Capsule	Cell Wall and Capsule - no subcategory	YjeE	NAD(P)HX dehydratase		4.62137e-20	0.583333	1	1	1	1	1	1	1	1	1	1	2	2	2	2	2	2	2	2	2	2	1	2	1	2	2	1	1	1	2	2	2	2	1	1	2	2	2	1	2	1	2	1	2
RNA Metabolism	Transcription	Transcription initiation, bacterial sigma factors	RNA polymerase sigma-70 factor		0.00382649	0.554167	2	2	2	3	2	3	3	2	2	2	4	4	2	2	2	3	3	2	3	3	2	3	2	3	3	3	2	3	2	2	2	4	4	3	5	3	3	7	3	3	3	2	4
Cell Wall and Capsule	Cell Wall and Capsule - no subcategory	Murein Hydrolases	Membrane-bound lytic murein transglycosylase D precursor (EC 3.2.1.-)		1.14614e-09	0.552083	1	1	1	1	1	1	1	1	1	1	1	3	3	1	2	2	1	2	1	2	1	1	1	1	1	2	1	1	2	1	2	2	1	4	1	1	1	2	2	1	1	1	2
Cofactors, Vitamins, Prosthetic Groups, Pigments	Folate and pterines	5-FCL-like protein	Serine hydroxymethyltransferase (EC 2.1.2.1)	SHM1	0.0129176	0.55	2	3	3	3	2	2	2	1	2	2	3	3	3	3	3	3	3	3	3	3	3	3	2	3	3	3	4	4	3	3	3	4	1	2	2	2	5	1	3	3	2	5	3
Regulation and Cell signaling	Regulation and Cell signaling - no subcategory	cAMP signaling in bacteria	Adenylate cyclase (EC 4.6.1.1)	adcy	0.00516248	0.535417	3	2	3	3	3	2	3	2	3	2	3	3	3	3	4	3	3	2	3	3	4	4	2	3	3	3	4	3	3	3	3	3	2	3	2	3	5	2	3	3	3	5	3
Carbohydrates	One-carbon Metabolism	Serine-glyoxylate cycle	Methenyltetrahydrofolate cyclohydrolase (EC 3.5.4.9)	MTHFD	1.54987e-13	0.53125	1	1	1	1	1	1	1	1	1	1	2	2	1	1	2	3	2	3	2	2	1	2	1	2	2	1	1	3	2	1	2	2	1	2	1	1	1	1	2	1	2	1	1
Cofactors, Vitamins, Prosthetic Groups, Pigments	Folate and pterines	5-FCL-like protein	Methylenetetrahydrofolate dehydrogenase (NADP+) (EC 1.5.1.5)	MTHFD2L	1.54987e-13	0.53125	1	1	1	1	1	1	1	1	1	1	2	2	1	1	2	3	2	3	2	2	1	2	1	2	2	1	1	3	2	1	2	2	1	2	1	1	1	1	2	1	2	1	1
Nitrogen Metabolism	Nitrogen Metabolism - no subcategory	Ammonia assimilation	Nitrogen regulatory protein P-II	GLB1	0.001733	0.522917	2	2	2	1	2	2	1	2	2	2	2	3	3	3	2	2	2	2	3	2	4	2	2	2	2	4	4	2	3	3	3	2	2	3	2	2	2	2	2	4	2	3	2
Virulence, Disease and Defense	Resistance to antibiotics and toxic compounds	Cobalt-zinc-cadmium resistance	Cobalt-zinc-cadmium resistance protein CzcD	czcD	0.0264711	0.516667	1	1	1	2	1	1	3	1	1	2	4	1	3	4	2	1	2	3	2	3	2	2	1	1	1	2	2	3	4	3	1	2	1	1	1	1	2	1	3	3	1	3	2
Membrane Transport	ABC transporters	ABC transporter oligopeptide (TC 3.A.1.5.1)	Oligopeptide transport system permease protein OppC (TC 3.A.1.5.1)	oppC	0.031914	0.50625	2	2	2	2	0	3	2	2	2	2	2	3	2	3	2	2	2	3	3	3	3	2	4	2	2	2	3	3	3	3	3	3	3	3	1	1	3	2	3	3	2	3	3
Amino Acids and Derivatives	Lysine, threonine, methionine, and cysteine	Methionine Biosynthesis	Adenosylhomocysteinase (EC 3.3.1.1)	ahcY	0	1	0	0	0	0	0	0	0	0	1	1	1	1	1	1	1	1	1	1	1	1	1	1	1	1	1	1	1	1	1	1	1	1	1	1	1	1	1	1	1	1	1	1	1
Respiration	Electron accepting reactions	Anaerobic respiratory reductases	Flavodoxin reductases (ferredoxin-NADPH reductases) family 1	ophA1_1	0	0	0	0	0	0	0	0	0	0	5	4	3	5	6	4	5	3	4	4	3	6	3	4	4	7	4	6	3	5	4	5	2	4	2	2	3	2	4	5	5	7	4	4	4
RNA Metabolism	RNA processing and modification	Queuosine-Archaeosine Biosynthesis	glutamyl-Q-tRNA synthetase	gluQ	0	0	0	0	0	0	0	0	0	0	1	1	1	1	1	1	1	1	1	1	1	1	0	1	1	1	1	1	1	1	1	1	1	1	1	1	1	1	1	1	1	1	1	1	1
Cofactors, Vitamins, Prosthetic Groups, Pigments	Folate and pterines	5-FCL-like protein	Formate--tetrahydrofolate ligase (EC 6.3.4.3)	THFS	0	0	0	0	0	0	0	0	0	0	1	1	1	1	1	1	1	1	1	1	1	1	0	1	1	1	1	1	1	1	1	1	1	1	1	1	1	1	1	1	1	1	1	1	1
[truncated: 41 more columns]
